# Supplementary material for: Good neighbors, bad neighbors: the frequent network neighborhood mapping of the hippocampus enlightens several structural factors of the human intelligence on a 414-subject cohort
Source: PubMed Central journal article supplement (PMC7371878; doi:10.1038/s41598-020-68914-2), 2020-07-20
Supplement: 41598_2020_68914_MOESM1_ESM.pdf [file 41598_2020_68914_MOESM1_ESM.pdf]

| p-value  | Holm-Bonferroni | frequency_upper | frequency_lower | name                                                                                  |
|----------|-----------------|-----------------|-----------------|---------------------------------------------------------------------------------------|
| 5.00E-05 | 0               | 0.92164         | 0.79327         | (Left-Caudate)(lh.fusiform_7)(lh.inferiorparietal_5)(lh.isthmuscingulate_2)           |
| 7.00E-05 | 0               | 0.94403         | 0.83173         | (Left-Caudate)(lh.inferiorparietal_5)(lh.isthmuscingulate_2)(lh.superiortemporal_3)   |
| 0.00012  | 0               | 0.92537         | 0.80769         | (Left-Caudate)(lh.fusiform_7)(lh.isthmuscingulate_2)(lh.superiortemporal_3)           |
| 0.00012  | 0               | 0.92537         | 0.80769         | (Left-Caudate)(lh.isthmuscingulate_2)(lh.superiortemporal_3)(lh.transversetemporal_2) |
| 0.00013  | 0               | 0.92164         | 0.80288         | (Left-Caudate)(lh.fusiform_7)(lh.inferiorparietal_5)(lh.superiortemporal_3)           |
| 0.00015  | 0               | 0.95522         | 0.85577         | (Left-Caudate)(Left-Putamen)(lh.isthmuscingulate_2)(lh.superiortemporal_3)            |
| 0.00016  | 0               | 0.93657         | 0.82692         | (Left-Caudate)(lh.inferiorparietal_5)(lh.isthmuscingulate_2)(lh.parahippocampal_3)    |
| 0.00017  | 0               | 0.95149         | 0.85096         | (Left-Caudate)(Left-Putamen)(lh.inferiorparietal_5)(lh.superiortemporal_3)            |
| 0.00017  | 0               | 0.95149         | 0.85096         | (Left-Caudate)(Left-Putamen)(lh.inferiorparietal_5)(lh.isthmuscingulate_2)            |
| 0.00018  | 0               | 0.93284         | 0.82212         | (Left-Caudate)(lh.fusiform_7)(lh.isthmuscingulate_2)                                  |
| 0.00018  | 0               | 0.93284         | 0.82212         | (Left-Caudate)(lh.fusiform_7)(lh.isthmuscingulate_2)(lh.superiortemporal_2)           |
| 0.00018  | 0               | 0.93284         | 0.82212         | (Left-Caudate)(Left-Putamen)(lh.fusiform_7)(lh.isthmuscingulate_2)                    |
| 0.00018  | 0               | 0.93284         | 0.82212         | (Left-Caudate)(Left-Thalamus-Proper)(lh.fusiform_7)(lh.isthmuscingulate_2)            |
| 0.00018  | 0               | 0.93284         | 0.82212         | (Left-Caudate)(lh.fusiform_7)(lh.isthmuscingulate_2)(lh.isthmuscingulate_3)           |
| 0.00019  | 0               | 0.9291          | 0.81731         | (Left-Caudate)(lh.fusiform_7)(lh.inferiorparietal_5)(lh.superiortemporal_2)           |
| 0.00021  | 0               | 0.92537         | 0.8125          | (Left-Caudate)(Left-Pallidum)(lh.fusiform_7)(lh.isthmuscingulate_2)                   |
| 0.00022  | 0               | 0.87313         | 0.74074         | (Left-Caudate)(lh.lingual_7)(lh.superiortemporal_3)(lh.transversetemporal_2)          |
| 0.00023  | 0               | 0.92164         | 0.80769         | (Left-Caudate)(lh.inferiorparietal_5)(lh.superiortemporal_3)(lh.transversetemporal_2) |
| 0.00024  | 0               | 0.91791         | 0.80288         | (Left-Caudate)(lh.fusiform_7)(lh.isthmuscingulate_2)(lh.lingual_6)                    |
| 0.00024  | 0               | 0.91791         | 0.80288         | (Left-Caudate)(lh.fusiform_7)(lh.isthmuscingulate_2)(lh.parahippocampal_3)            |
| 0.00025  | 0               | 0.9403          | 0.83654         | (Left-Caudate)(Left-Pallidum)(lh.isthmuscingulate_2)(lh.superiortemporal_3)           |
| 0.00025  | 0               | 0.91418         | 0.79808         | (Left-Caudate)(Left-Pallidum)(lh.isthmuscingulate_2)(lh.transversetemporal_2)         |
| 0.00025  | 0               | 0.91418         | 0.79808         | (Left-Caudate)(lh.isthmuscingulate_2)(lh.parahippocampal_3)(lh.transversetemporal_2)  |
| 0.00026  | 0               | 0.95522         | 0.86058         | (Left-Caudate)(lh.isthmuscingulate_2)(lh.superiortemporal_3)                          |
| 0.00026  | 0               | 0.95522         | 0.86058         | (Left-Caudate)(lh.isthmuscingulate_2)(lh.isthmuscingulate_3)(lh.superiortemporal_3)   |
| 0.00026  | 0               | 0.95522         | 0.86058         | (Left-Caudate)(Left-Thalamus-Proper)(lh.isthmuscingulate_2)(lh.superiortemporal_3)    |
| 0.00026  | 0               | 0.95522         | 0.86058         | (Left-Caudate)(lh.isthmuscingulate_2)(lh.superiortemporal_2)(lh.superiortemporal_3)   |
| 0.00027  | 0               | 0.91045         | 0.79327         | (Left-Caudate)(lh.fusiform_7)(lh.isthmuscingulate_2)(lh.precuneus_11)                 |
| 0.00028  | 0               | 0.93657         | 0.83173         | (Left-Caudate)(Left-Pallidum)(lh.inferiorparietal_5)(lh.superiortemporal_3)           |
| 0.00028  | 0               | 0.90672         | 0.78846         | (Left-Caudate)(lh.fusiform_7)(lh.superiortemporal_2)(lh.transversetemporal_2)         |
| 0.00029  | 0               | 0.90299         | 0.78365         | (Left-Caudate)(Left-Pallidum)(lh.fusiform_7)(lh.transversetemporal_2)                 |
| 0.0003   | 0               | 0.93284         | 0.82692         | (Left-Caudate)(Left-Putamen)(lh.superiortemporal_3)(lh.transversetemporal_2)          |
| 0.0003   | 0               | 0.93284         | 0.82692         | (Left-Caudate)(Left-Pallidum)(lh.inferiorparietal_5)(lh.isthmuscingulate_2)           |

|         |   |         |         |                                                                                       |
|---------|---|---------|---------|---------------------------------------------------------------------------------------|
| 0.0003  | 0 | 0.95149 | 0.85577 | (Left-Caudate)(lh.inferiorparietal_5)(lh.superiortemporal_2)(lh.superiortemporal_3)   |
| 0.0003  | 0 | 0.95149 | 0.85577 | (Left-Caudate)(lh.inferiorparietal_5)(lh.superiortemporal_3)                          |
| 0.0003  | 0 | 0.95149 | 0.85577 | (Left-Caudate)(Left-Thalamus-Proper)(lh.inferiorparietal_5)(lh.superiortemporal_3)    |
| 0.0003  | 0 | 0.95149 | 0.85577 | (Left-Caudate)(lh.inferiorparietal_5)(lh.isthmuscingulate_3)(lh.superiortemporal_3)   |
| 0.00032 | 0 | 0.83209 | 0.69231 | (Left-Accumbens-area)(Left-Caudate)(Left-Pallidum)(lh.transversetemporal_2)           |
| 0.00033 | 0 | 0.9291  | 0.82212 | (Left-Caudate)(lh.fusiform_7)(lh.inferiorparietal_5)(lh.isthmuscingulate_3)           |
| 0.00033 | 0 | 0.9291  | 0.82212 | (Left-Caudate)(lh.fusiform_7)(lh.insula_2)(lh.isthmuscingulate_2)                     |
| 0.00033 | 0 | 0.9291  | 0.82212 | (Left-Caudate)(Left-Putamen)(lh.fusiform_7)(lh.inferiorparietal_5)                    |
| 0.00033 | 0 | 0.9291  | 0.82212 | (Left-Caudate)(Left-Pallidum)(lh.fusiform_7)(lh.superiortemporal_3)                   |
| 0.00033 | 0 | 0.9291  | 0.82212 | (Left-Caudate)(Left-Putamen)(lh.isthmuscingulate_2)(lh.transversetemporal_2)          |
| 0.00033 | 0 | 0.9291  | 0.82212 | (Left-Caudate)(lh.fusiform_7)(lh.inferiorparietal_5)                                  |
| 0.00033 | 0 | 0.9291  | 0.82212 | (Left-Caudate)(Left-Thalamus-Proper)(lh.fusiform_7)(lh.inferiorparietal_5)            |
| 0.00033 | 0 | 0.84328 | 0.70673 | (Left-Accumbens-area)(Left-Caudate)(lh.inferiorparietal_5)(lh.isthmuscingulate_2)     |
| 0.00034 | 0 | 0.94776 | 0.85096 | (Left-Caudate)(Left-Putamen)(lh.isthmuscingulate_2)(lh.parahippocampal_3)             |
| 0.00037 | 0 | 0.92164 | 0.8125  | (Left-Caudate)(Left-Pallidum)(lh.fusiform_7)(lh.inferiorparietal_5)                   |
| 0.00039 | 0 | 0.91791 | 0.80769 | (Left-Caudate)(lh.inferiorparietal_5)(lh.isthmuscingulate_2)(lh.transversetemporal_2) |
| 0.00039 | 0 | 0.91791 | 0.80769 | (Left-Caudate)(Left-Pallidum)(lh.superiortemporal_3)(lh.transversetemporal_2)         |
| 0.00041 | 0 | 0.91418 | 0.80288 | (Left-Caudate)(lh.fusiform_7)(lh.inferiorparietal_5)(lh.lingual_6)                    |
| 0.00041 | 0 | 0.91418 | 0.80288 | (Left-Caudate)(lh.fusiform_7)(lh.inferiorparietal_5)(lh.parahippocampal_3)            |
| 0.00043 | 0 | 0.9403  | 0.84135 | (Left-Caudate)(lh.isthmuscingulate_2)(lh.parahippocampal_3)(lh.superiortemporal_3)    |
| 0.00045 | 0 | 0.90672 | 0.79327 | (Left-Caudate)(lh.fusiform_7)(lh.transversetemporal_2)                                |
| 0.00045 | 0 | 0.90672 | 0.79327 | (Left-Caudate)(lh.fusiform_7)(lh.isthmuscingulate_3)(lh.transversetemporal_2)         |
| 0.00045 | 0 | 0.90672 | 0.79327 | (Left-Caudate)(Left-Putamen)(lh.fusiform_7)(lh.transversetemporal_2)                  |
| 0.00045 | 0 | 0.90672 | 0.79327 | (Left-Caudate)(lh.fusiform_7)(lh.insula_2)(lh.transversetemporal_2)                   |
| 0.00045 | 0 | 0.90672 | 0.79327 | (Left-Caudate)(Left-Thalamus-Proper)(lh.fusiform_7)(lh.transversetemporal_2)          |
| 0.00047 | 0 | 0.93657 | 0.83654 | (Left-Caudate)(lh.inferiorparietal_5)(lh.parahippocampal_3)(lh.superiortemporal_3)    |
| 0.00047 | 0 | 0.90299 | 0.78846 | (Left-Caudate)(lh.fusiform_7)(lh.isthmuscingulate_2)(lh.parahippocampal_1)            |
| 0.00048 | 0 | 0.82836 | 0.69231 | (Left-Accumbens-area)(Left-Caudate)(lh.superiortemporal_3)(lh.transversetemporal_2)   |
| 0.0005  | 0 | 0.83955 | 0.70673 | (Left-Accumbens-area)(Left-Pallidum)(lh.isthmuscingulate_2)(lh.transversetemporal_2)  |
| 0.0005  | 0 | 0.93284 | 0.83173 | (Left-Caudate)(lh.fusiform_7)(lh.superiortemporal_2)(lh.superiortemporal_3)           |
| 0.0005  | 0 | 0.93284 | 0.83173 | (Left-Caudate)(lh.fusiform_7)(lh.isthmuscingulate_3)(lh.superiortemporal_3)           |
| 0.0005  | 0 | 0.93284 | 0.83173 | (Left-Caudate)(lh.fusiform_7)(lh.insula_2)(lh.superiortemporal_3)                     |
| 0.0005  | 0 | 0.93284 | 0.83173 | (Left-Caudate)(lh.superiortemporal_2)(lh.superiortemporal_3)(lh.transversetemporal_2) |
| 0.0005  | 0 | 0.93284 | 0.83173 | (Left-Caudate)(lh.isthmuscingulate_3)(lh.superiortemporal_3)(lh.transversetemporal_2) |
