# Supplementary material for: Good neighbors, bad neighbors: the frequent network neighborhood mapping of the hippocampus enlightens several structural factors of the human intelligence on a 414-subject cohort
Source: PubMed Central journal article supplement (PMC7371878; doi:10.1038/s41598-020-68914-2), 2020-07-20
Supplement: 41598_2020_68914_MOESM2_ESM.pdf [file 41598_2020_68914_MOESM2_ESM.pdf]

| p-value | Holm-Bonferroni | frequency_upper | frequency_lower | name                                                                |
|---------|-----------------|-----------------|-----------------|---------------------------------------------------------------------|
| 0.00446 | 1.00E-05        | 0.76761         | 0.87019         | (lh.bankssts_3)(lh.fusiform_5)(lh.inferiorparietal_4)(lh.insula_1)  |
| 0.00823 | 2.00E-05        | 0.78169         | 0.875           | (lh.bankssts_3)(lh.insula_1)(lh.lateraloccipital_9)(lh.lingual_8)   |
| 0.00966 | 7.00E-05        | 0.79577         | 0.88462         | (lh.bankssts_3)(lh.fusiform_5)(lh.inferiorparietal_4)(lh.lingual_8) |
