# Supplementary material for: Good neighbors, bad neighbors: the frequent network neighborhood mapping of the hippocampus enlightens several structural factors of the human intelligence on a 414-subject cohort
Source: PubMed Central journal article supplement (PMC7371878; doi:10.1038/s41598-020-68914-2), 2020-07-20
Supplement: 41598_2020_68914_MOESM3_ESM.pdf [file 41598_2020_68914_MOESM3_ESM.pdf]

| p-value  | Holm-Bonferroni | frequency_upper | frequency_lower | name                                                                                  |
|----------|-----------------|-----------------|-----------------|---------------------------------------------------------------------------------------|
| 8.00E-05 | 1.00E-05        | 0.83209         | 0.67788         | (rh.fusiform_7)(rh.inferiorparietal_9)(rh.parahippocampal_3)(rh.precuneus_2)          |
| 9.00E-05 | 1.00E-05        | 0.84701         | 0.69712         | (rh.fusiform_7)(rh.inferiorparietal_9)(rh.precuneus_2)(rh.superiortemporal_3)         |
| 9.00E-05 | 1.00E-05        | 0.85075         | 0.70192         | (rh.bankssts_2)(rh.fusiform_7)(rh.inferiorparietal_9)(rh.precuneus_2)                 |
| 9.00E-05 | 1.00E-05        | 0.85075         | 0.70192         | (rh.fusiform_7)(rh.inferiorparietal_9)(rh.lingual_7)(rh.precuneus_2)                  |
| 0.00012  | 1.00E-05        | 0.81343         | 0.65865         | (rh.entorhinal_1)(rh.fusiform_7)(rh.inferiorparietal_9)(rh.precuneus_2)               |
| 0.00014  | 1.00E-05        | 0.84328         | 0.69712         | (rh.fusiform_7)(rh.inferiorparietal_9)(rh.parahippocampal_2)(rh.precuneus_2)          |
| 0.00014  | 1.00E-05        | 0.85075         | 0.70673         | (rh.fusiform_7)(rh.inferiorparietal_9)(rh.insula_2)(rh.precuneus_2)                   |
| 0.00014  | 1.00E-05        | 0.85075         | 0.70673         | (rh.fusiform_7)(rh.inferiorparietal_9)(rh.isthmuscingulate_2)(rh.precuneus_2)         |
| 0.00014  | 1.00E-05        | 0.85075         | 0.70673         | (Right-Thalamus-Proper)(rh.fusiform_7)(rh.inferiorparietal_9)(rh.precuneus_2)         |
| 0.00014  | 1.00E-05        | 0.85075         | 0.70673         | (Right-Putamen)(rh.fusiform_7)(rh.inferiorparietal_9)(rh.precuneus_2)                 |
| 0.00014  | 1.00E-05        | 0.85075         | 0.70673         | (rh.fusiform_7)(rh.inferiorparietal_9)(rh.precuneus_2)                                |
| 0.00018  | 1.00E-05        | 0.89925         | 0.77404         | (rh.inferiorparietal_9)(rh.parahippocampal_2)(rh.precuneus_2)(rh.superiortemporal_3)  |
| 0.00021  | 1.00E-05        | 0.83582         | 0.69231         | (rh.fusiform_7)(rh.inferiorparietal_9)(rh.precuneus_2)(rh.supramarginal_9)            |
| 0.00021  | 1.00E-05        | 0.83955         | 0.69712         | (Right-Caudate)(rh.fusiform_7)(rh.inferiorparietal_9)(rh.precuneus_2)                 |
| 0.00022  | 1.00E-05        | 0.84701         | 0.70673         | (Right-Pallidum)(rh.fusiform_7)(rh.inferiorparietal_9)(rh.precuneus_2)                |
| 0.00028  | 1.00E-05        | 0.90672         | 0.78846         | (rh.inferiorparietal_9)(rh.lingual_7)(rh.precuneus_2)(rh.superiortemporal_3)          |
| 0.00028  | 1.00E-05        | 0.90672         | 0.78846         | (rh.bankssts_2)(rh.inferiorparietal_9)(rh.precuneus_2)(rh.superiortemporal_3)         |
| 0.00032  | 1.00E-05        | 0.83209         | 0.69231         | (rh.fusiform_7)(rh.inferiorparietal_9)(rh.parahippocampal_3)(rh.superiortemporal_3)   |
| 0.00032  | 1.00E-05        | 0.83582         | 0.69712         | (rh.bankssts_2)(rh.fusiform_7)(rh.inferiorparietal_9)(rh.parahippocampal_3)           |
| 0.00032  | 1.00E-05        | 0.83582         | 0.69712         | (rh.fusiform_7)(rh.inferiorparietal_9)(rh.lingual_7)(rh.parahippocampal_3)            |
| 0.00033  | 1.00E-05        | 0.83955         | 0.70192         | (rh.fusiform_7)(rh.inferiorparietal_9)(rh.insula_5)(rh.precuneus_2)                   |
| 0.00033  | 1.00E-05        | 0.84328         | 0.70673         | (rh.fusiform_7)(rh.inferiorparietal_9)(rh.precuneus_2)(rh.superiortemporal_9)         |
| 0.00034  | 1.00E-05        | 0.85075         | 0.71635         | (rh.bankssts_2)(rh.fusiform_7)(rh.inferiorparietal_9)(rh.superiortemporal_3)          |
| 0.00034  | 1.00E-05        | 0.85075         | 0.71635         | (rh.fusiform_7)(rh.inferiorparietal_9)(rh.lingual_7)(rh.superiortemporal_3)           |
| 0.00034  | 1.00E-05        | 0.85448         | 0.72115         | (rh.bankssts_2)(rh.fusiform_7)(rh.inferiorparietal_9)(rh.lingual_7)                   |
| 0.00036  | 1.00E-05        | 0.91045         | 0.7963          | (rh.inferiorparietal_9)(rh.lingual_7)(rh.superiortemporal_3)                          |
| 0.00041  | 1.00E-05        | 0.90299         | 0.78704         | (rh.inferiorparietal_9)(rh.parahippocampal_2)(rh.superiortemporal_3)                  |
| 0.00042  | 1.00E-05        | 0.8097          | 0.66827         | (rh.entorhinal_1)(rh.fusiform_7)(rh.inferiorparietal_9)(rh.parahippocampal_3)         |
| 0.00044  | 1.00E-05        | 0.81343         | 0.67308         | (rh.entorhinal_1)(rh.fusiform_7)(rh.inferiorparietal_9)(rh.superiortemporal_3)        |
| 0.00045  | 1.00E-05        | 0.81716         | 0.67788         | (rh.bankssts_2)(rh.entorhinal_1)(rh.fusiform_7)(rh.inferiorparietal_9)                |
| 0.00045  | 1.00E-05        | 0.81716         | 0.67788         | (rh.fusiform_7)(rh.fusiform_8)(rh.inferiorparietal_9)(rh.parahippocampal_3)           |
| 0.00045  | 1.00E-05        | 0.81716         | 0.67788         | (rh.entorhinal_1)(rh.fusiform_7)(rh.inferiorparietal_9)(rh.lingual_7)                 |
| 0.00045  | 1.00E-05        | 0.90672         | 0.79327         | (rh.inferiorparietal_9)(rh.isthmuscingulate_2)(rh.precuneus_2)(rh.superiortemporal_3) |
| 0.00045  | 1.00E-05        | 0.90672         | 0.79327         | (Right-Putamen)(rh.inferiorparietal_9)(rh.precuneus_2)(rh.superiortemporal_3)         |

|         |          |         |         |                                                                                       |
|---------|----------|---------|---------|---------------------------------------------------------------------------------------|
| 0.00045 | 1.00E-05 | 0.90672 | 0.79327 | (Right-Thalamus-Proper)(rh.inferiorparietal_9)(rh.precuneus_2)(rh.superiortemporal_3) |
| 0.00046 | 1.00E-05 | 0.8209  | 0.68269 | (rh.fusiform_7)(rh.fusiform_8)(rh.inferiorparietal_9)(rh.precuneus_2)                 |
| 0.00047 | 1.00E-05 | 0.90299 | 0.78846 | (rh.bankssts_2)(rh.fusiform_7)(rh.parahippocampal_3)(rh.precuneus_2)                  |
| 0.00047 | 1.00E-05 | 0.90299 | 0.78846 | (rh.fusiform_7)(rh.lingual_7)(rh.parahippocampal_3)(rh.precuneus_2)                   |
| 0.00047 | 1.00E-05 | 0.90299 | 0.78846 | (rh.inferiorparietal_9)(rh.insula_2)(rh.precuneus_2)(rh.superiortemporal_3)           |
| 0.00048 | 1.00E-05 | 0.89925 | 0.78365 | (rh.fusiform_7)(rh.parahippocampal_3)(rh.precuneus_2)(rh.superiortemporal_3)          |
| 0.0005  | 1.00E-05 | 0.83582 | 0.70192 | (rh.fusiform_7)(rh.inferiorparietal_9)(rh.superiortemporal_3)(rh.supramarginal_9)     |
| 0.0005  | 1.00E-05 | 0.83582 | 0.70192 | (Right-Pallidum)(rh.fusiform_7)(rh.inferiorparietal_9)(rh.parahippocampal_3)          |
| 0.0005  | 1.00E-05 | 0.83582 | 0.70192 | (rh.fusiform_7)(rh.inferiorparietal_10)(rh.inferiorparietal_9)(rh.precuneus_2)        |
| 0.0005  | 1.00E-05 | 0.83582 | 0.70192 | (Right-Putamen)(rh.fusiform_7)(rh.inferiorparietal_9)(rh.parahippocampal_3)           |
| 0.0005  | 1.00E-05 | 0.83582 | 0.70192 | (rh.fusiform_7)(rh.inferiorparietal_9)(rh.insula_2)(rh.parahippocampal_3)             |
| 0.0005  | 1.00E-05 | 0.83582 | 0.70192 | (rh.fusiform_7)(rh.inferiorparietal_9)(rh.isthmuscingulate_2)(rh.parahippocampal_3)   |
| 0.0005  | 1.00E-05 | 0.83582 | 0.70192 | (rh.fusiform_7)(rh.inferiorparietal_9)(rh.parahippocampal_3)                          |
| 0.0005  | 1.00E-05 | 0.83582 | 0.70192 | (Right-Thalamus-Proper)(rh.fusiform_7)(rh.inferiorparietal_9)(rh.parahippocampal_3)   |
| 0.0005  | 1.00E-05 | 0.83955 | 0.70673 | (rh.bankssts_2)(rh.fusiform_7)(rh.inferiorparietal_9)(rh.supramarginal_9)             |
| 0.0005  | 1.00E-05 | 0.83955 | 0.70673 | (rh.fusiform_7)(rh.inferiorparietal_9)(rh.lingual_7)(rh.supramarginal_9)              |
| 0.00051 | 1.00E-05 | 0.84328 | 0.71154 | (rh.fusiform_7)(rh.inferiorparietal_9)(rh.parahippocampal_2)(rh.superiortemporal_3)   |
| 0.00052 | 1.00E-05 | 0.84701 | 0.71635 | (rh.bankssts_2)(rh.fusiform_7)(rh.inferiorparietal_9)(rh.parahippocampal_2)           |
| 0.00052 | 1.00E-05 | 0.84701 | 0.71635 | (rh.fusiform_7)(rh.inferiorparietal_9)(rh.lingual_7)(rh.parahippocampal_2)            |
| 0.00052 | 1.00E-05 | 0.85075 | 0.72115 | (Right-Thalamus-Proper)(rh.fusiform_7)(rh.inferiorparietal_9)(rh.superiortemporal_3)  |
| 0.00052 | 1.00E-05 | 0.85075 | 0.72115 | (rh.fusiform_7)(rh.inferiorparietal_9)(rh.isthmuscingulate_2)(rh.superiortemporal_3)  |
| 0.00052 | 1.00E-05 | 0.85075 | 0.72115 | (Right-Putamen)(rh.fusiform_7)(rh.inferiorparietal_9)(rh.superiortemporal_3)          |
| 0.00052 | 1.00E-05 | 0.85075 | 0.72115 | (rh.fusiform_7)(rh.inferiorparietal_9)(rh.superiortemporal_3)                         |
| 0.00052 | 1.00E-05 | 0.85075 | 0.72115 | (rh.fusiform_7)(rh.inferiorparietal_9)(rh.insula_2)(rh.superiortemporal_3)            |
| 0.00053 | 1.00E-05 | 0.85448 | 0.72596 | (Right-Putamen)(rh.fusiform_7)(rh.inferiorparietal_9)(rh.lingual_7)                   |
| 0.00053 | 1.00E-05 | 0.85448 | 0.72596 | (rh.fusiform_7)(rh.inferiorparietal_9)(rh.insula_2)(rh.lingual_7)                     |
| 0.00053 | 1.00E-05 | 0.85448 | 0.72596 | (Right-Thalamus-Proper)(rh.fusiform_7)(rh.inferiorparietal_9)(rh.lingual_7)           |
| 0.00053 | 1.00E-05 | 0.85448 | 0.72596 | (Right-Thalamus-Proper)(rh.bankssts_2)(rh.fusiform_7)(rh.inferiorparietal_9)          |
| 0.00053 | 1.00E-05 | 0.85448 | 0.72596 | (rh.fusiform_7)(rh.inferiorparietal_9)(rh.isthmuscingulate_2)(rh.lingual_7)           |
| 0.00053 | 1.00E-05 | 0.85448 | 0.72596 | (Right-Putamen)(rh.bankssts_2)(rh.fusiform_7)(rh.inferiorparietal_9)                  |
| 0.00053 | 1.00E-05 | 0.85448 | 0.72596 | (rh.bankssts_2)(rh.fusiform_7)(rh.inferiorparietal_9)(rh.isthmuscingulate_2)          |
| 0.00053 | 1.00E-05 | 0.85448 | 0.72596 | (rh.fusiform_7)(rh.inferiorparietal_9)(rh.lingual_7)                                  |
| 0.00053 | 1.00E-05 | 0.85448 | 0.72596 | (rh.bankssts_2)(rh.fusiform_7)(rh.inferiorparietal_9)(rh.insula_2)                    |
| 0.00053 | 1.00E-05 | 0.85448 | 0.72596 | (rh.bankssts_2)(rh.fusiform_7)(rh.inferiorparietal_9)                                 |
| 0.00061 | 1.00E-05 | 0.90672 | 0.7963  | (rh.inferiorparietal_9)(rh.insula_2)(rh.lingual_7)(rh.precuneus_2)                    |

|         |          |         |         |                                                                                     |
|---------|----------|---------|---------|-------------------------------------------------------------------------------------|
| 0.00061 | 1.00E-05 | 0.90672 | 0.7963  | (rh.inferiorparietal_9)(rh.precuneus_2)(rh.superiortemporal_3)                      |
| 0.00061 | 1.00E-05 | 0.90672 | 0.7963  | (rh.inferiorparietal_9)(rh.lingual_7)(rh.parahippocampal_2)                         |
| 0.00061 | 1.00E-05 | 0.92164 | 0.81731 | (rh.bankssts_2)(rh.fusiform_7)(rh.lingual_7)(rh.precuneus_2)                        |
| 0.00064 | 1.00E-05 | 0.91791 | 0.8125  | (rh.fusiform_7)(rh.lingual_7)(rh.precuneus_2)(rh.superiortemporal_3)                |
| 0.00064 | 1.00E-05 | 0.91791 | 0.8125  | (rh.bankssts_2)(rh.fusiform_7)(rh.precuneus_2)(rh.superiortemporal_3)               |
| 0.00067 | 1.00E-05 | 0.81716 | 0.68269 | (rh.entorhinal_1)(rh.fusiform_7)(rh.inferiorparietal_9)(rh.superiortemporal_9)      |
| 0.00067 | 1.00E-05 | 0.81716 | 0.68269 | (Right-Pallidum)(rh.entorhinal_1)(rh.fusiform_7)(rh.inferiorparietal_9)             |
| 0.00067 | 1.00E-05 | 0.81716 | 0.68269 | (Right-Putamen)(rh.entorhinal_1)(rh.fusiform_7)(rh.inferiorparietal_9)              |
| 0.00067 | 1.00E-05 | 0.81716 | 0.68269 | (rh.entorhinal_1)(rh.fusiform_7)(rh.inferiorparietal_9)                             |
| 0.00067 | 1.00E-05 | 0.81716 | 0.68269 | (rh.entorhinal_1)(rh.fusiform_7)(rh.inferiorparietal_9)(rh.isthmuscingulate_2)      |
| 0.00067 | 1.00E-05 | 0.81716 | 0.68269 | (rh.entorhinal_1)(rh.fusiform_7)(rh.inferiorparietal_9)(rh.insula_2)                |
| 0.00067 | 1.00E-05 | 0.81716 | 0.68269 | (Right-Thalamus-Proper)(rh.entorhinal_1)(rh.fusiform_7)(rh.inferiorparietal_9)      |
| 0.00069 | 1.00E-05 | 0.8209  | 0.6875  | (rh.fusiform_7)(rh.inferiorparietal_9)(rh.parahippocampal_3)(rh.supramarginal_9)    |
| 0.00071 | 1.00E-05 | 0.82463 | 0.69231 | (Right-Caudate)(rh.fusiform_7)(rh.inferiorparietal_9)(rh.parahippocampal_3)         |
| 0.00072 | 1.00E-05 | 0.82836 | 0.69712 | (rh.fusiform_7)(rh.inferiorparietal_9)(rh.insula_5)(rh.parahippocampal_3)           |
| 0.00072 | 1.00E-05 | 0.82836 | 0.69712 | (rh.fusiform_7)(rh.inferiorparietal_9)(rh.parahippocampal_2)(rh.parahippocampal_3)  |
| 0.00072 | 1.00E-05 | 0.82836 | 0.69712 | (rh.fusiform_7)(rh.inferiorparietal_9)(rh.precuneus_2)(rh.precuneus_3)              |
| 0.00074 | 1.00E-05 | 0.83209 | 0.70192 | (rh.fusiform_7)(rh.inferiorparietal_9)(rh.parahippocampal_3)(rh.superiortemporal_9) |
| 0.00074 | 1.00E-05 | 0.83209 | 0.70192 | (rh.fusiform_7)(rh.inferiorparietal_9)(rh.parahippocampal_2)(rh.supramarginal_9)    |
| 0.00074 | 1.00E-05 | 0.83209 | 0.70192 | (Right-Caudate)(rh.fusiform_7)(rh.inferiorparietal_9)(rh.supramarginal_9)           |
| 0.00074 | 1.00E-05 | 0.83209 | 0.70192 | (rh.fusiform_7)(rh.inferiorparietal_9)(rh.insula_4)(rh.precuneus_2)                 |
| 0.00074 | 1.00E-05 | 0.83209 | 0.70192 | (rh.fusiform_7)(rh.inferiorparietal_4)(rh.inferiorparietal_9)(rh.precuneus_2)       |
| 0.00074 | 1.00E-05 | 0.90299 | 0.79327 | (rh.fusiform_7)(rh.insula_2)(rh.parahippocampal_3)(rh.precuneus_2)                  |
| 0.00074 | 1.00E-05 | 0.90299 | 0.79327 | (Right-Thalamus-Proper)(rh.fusiform_7)(rh.parahippocampal_3)(rh.precuneus_2)        |
| 0.00074 | 1.00E-05 | 0.90299 | 0.79327 | (rh.fusiform_7)(rh.parahippocampal_3)(rh.precuneus_2)                               |
| 0.00074 | 1.00E-05 | 0.90299 | 0.79327 | (rh.inferiorparietal_9)(rh.lingual_7)(rh.parahippocampal_2)(rh.superiortemporal_3)  |
| 0.00074 | 1.00E-05 | 0.90299 | 0.79327 | (rh.fusiform_7)(rh.isthmuscingulate_2)(rh.parahippocampal_3)(rh.precuneus_2)        |
| 0.00074 | 1.00E-05 | 0.90299 | 0.79327 | (Right-Pallidum)(rh.fusiform_7)(rh.parahippocampal_3)(rh.precuneus_2)               |
| 0.00074 | 1.00E-05 | 0.90299 | 0.79327 | (Right-Putamen)(rh.fusiform_7)(rh.parahippocampal_3)(rh.precuneus_2)                |
| 0.00074 | 1.00E-05 | 0.90299 | 0.79327 | (rh.bankssts_2)(rh.inferiorparietal_9)(rh.parahippocampal_2)(rh.superiortemporal_3) |
| 0.00076 | 1.00E-05 | 0.89925 | 0.78846 | (rh.inferiorparietal_9)(rh.insula_2)(rh.parahippocampal_2)(rh.precuneus_2)          |
| 0.00077 | 1.00E-05 | 0.83955 | 0.71154 | (Right-Thalamus-Proper)(rh.fusiform_7)(rh.inferiorparietal_9)(rh.supramarginal_9)   |
| 0.00077 | 1.00E-05 | 0.83955 | 0.71154 | (rh.fusiform_7)(rh.inferiorparietal_9)(rh.isthmuscingulate_2)(rh.supramarginal_9)   |
| 0.00077 | 1.00E-05 | 0.83955 | 0.71154 | (rh.inferiorparietal_9)(rh.precuneus_2)(rh.precuneus_4)(rh.superiortemporal_3)      |
| 0.00077 | 1.00E-05 | 0.83955 | 0.71154 | (Right-Caudate)(rh.fusiform_7)(rh.inferiorparietal_9)(rh.parahippocampal_2)         |

|         |          |         |         |                                                                                        |
|---------|----------|---------|---------|----------------------------------------------------------------------------------------|
| 0.00077 | 1.00E-05 | 0.83955 | 0.71154 | (Right-Putamen)(rh.fusiform_7)(rh.inferiorparietal_9)(rh.supramarginal_9)              |
| 0.00077 | 1.00E-05 | 0.83955 | 0.71154 | (rh.fusiform_7)(rh.inferiorparietal_9)(rh.insula_2)(rh.supramarginal_9)                |
| 0.00077 | 1.00E-05 | 0.83955 | 0.71154 | (Right-Caudate)(rh.fusiform_7)(rh.inferiorparietal_9)(rh.superiortemporal_3)           |
| 0.00078 | 1.00E-05 | 0.84328 | 0.71635 | (Right-Caudate)(rh.bankssts_2)(rh.fusiform_7)(rh.inferiorparietal_9)                   |
| 0.00078 | 1.00E-05 | 0.84328 | 0.71635 | (Right-Caudate)(rh.fusiform_7)(rh.inferiorparietal_9)(rh.lingual_7)                    |
| 0.00078 | 1.00E-05 | 0.89552 | 0.78365 | (Right-Caudate)(rh.inferiorparietal_9)(rh.precuneus_2)(rh.superiortemporal_3)          |
| 0.00079 | 1.00E-05 | 0.84701 | 0.72115 | (rh.fusiform_7)(rh.inferiorparietal_9)(rh.insula_2)(rh.parahippocampal_2)              |
| 0.00079 | 1.00E-05 | 0.84701 | 0.72115 | (Right-Putamen)(rh.fusiform_7)(rh.inferiorparietal_9)(rh.parahippocampal_2)            |
| 0.00079 | 1.00E-05 | 0.84701 | 0.72115 | (rh.fusiform_7)(rh.inferiorparietal_9)(rh.isthmuscingulate_2)(rh.parahippocampal_2)    |
| 0.00079 | 1.00E-05 | 0.84701 | 0.72115 | (Right-Thalamus-Proper)(rh.fusiform_7)(rh.inferiorparietal_9)(rh.parahippocampal_2)    |
| 0.00079 | 1.00E-05 | 0.84701 | 0.72115 | (rh.fusiform_7)(rh.inferiorparietal_9)(rh.parahippocampal_2)                           |
| 0.00079 | 1.00E-05 | 0.84701 | 0.72115 | (Right-Pallidum)(rh.fusiform_7)(rh.inferiorparietal_9)(rh.superiortemporal_3)          |
| 0.00079 | 1.00E-05 | 0.89179 | 0.77885 | (rh.inferiorparietal_10)(rh.inferiorparietal_9)(rh.precuneus_2)(rh.superiortemporal_3) |
| 0.00079 | 1.00E-05 | 0.89179 | 0.77885 | (rh.inferiorparietal_9)(rh.precuneus_2)(rh.superiortemporal_3)(rh.supramarginal_9)     |
| 0.0008  | 1.00E-05 | 0.85075 | 0.72596 | (Right-Pallidum)(rh.bankssts_2)(rh.fusiform_7)(rh.inferiorparietal_9)                  |
| 0.0008  | 1.00E-05 | 0.85075 | 0.72596 | (Right-Pallidum)(rh.fusiform_7)(rh.inferiorparietal_9)(rh.lingual_7)                   |
| 0.00081 | 1.00E-05 | 0.85448 | 0.73077 | (Right-Putamen)(rh.fusiform_7)(rh.inferiorparietal_9)(rh.insula_2)                     |
| 0.00081 | 1.00E-05 | 0.85448 | 0.73077 | (Right-Thalamus-Proper)(rh.fusiform_7)(rh.inferiorparietal_9)(rh.insula_2)             |
| 0.00081 | 1.00E-05 | 0.85448 | 0.73077 | (Right-Putamen)(rh.fusiform_7)(rh.inferiorparietal_9)                                  |
| 0.00081 | 1.00E-05 | 0.85448 | 0.73077 | (Right-Putamen)(rh.fusiform_7)(rh.inferiorparietal_9)(rh.isthmuscingulate_2)           |
| 0.00081 | 1.00E-05 | 0.85448 | 0.73077 | (rh.fusiform_7)(rh.inferiorparietal_9)(rh.isthmuscingulate_2)                          |
| 0.00081 | 1.00E-05 | 0.85448 | 0.73077 | (Right-Putamen)(Right-Thalamus-Proper)(rh.fusiform_7)(rh.inferiorparietal_9)           |
| 0.00081 | 1.00E-05 | 0.85448 | 0.73077 | (rh.fusiform_7)(rh.inferiorparietal_9)(rh.insula_2)(rh.isthmuscingulate_2)             |
| 0.00081 | 1.00E-05 | 0.85448 | 0.73077 | (Right-Thalamus-Proper)(rh.fusiform_7)(rh.inferiorparietal_9)(rh.isthmuscingulate_2)   |
| 0.00081 | 1.00E-05 | 0.85448 | 0.73077 | (rh.fusiform_7)(rh.precuneus_2)(rh.precuneus_4)(rh.superiortemporal_3)                 |
| 0.00081 | 1.00E-05 | 0.85448 | 0.73077 | (rh.fusiform_7)(rh.inferiorparietal_9)(rh.insula_2)                                    |
| 0.00081 | 1.00E-05 | 0.85448 | 0.73077 | (Right-Thalamus-Proper)(rh.fusiform_7)(rh.inferiorparietal_9)                          |
| 0.00081 | 1.00E-05 | 0.88433 | 0.76923 | (rh.fusiform_7)(rh.fusiform_8)(rh.parahippocampal_3)(rh.precuneus_2)                   |
| 0.00082 | 1.00E-05 | 0.85821 | 0.73558 | (rh.bankssts_2)(rh.fusiform_7)(rh.precuneus_2)(rh.precuneus_4)                         |
| 0.00095 | 1.00E-05 | 0.8097  | 0.67788 | (rh.entorhinal_1)(rh.fusiform_7)(rh.inferiorparietal_9)(rh.parahippocampal_2)          |
| 0.00098 | 1.00E-05 | 0.81343 | 0.68269 | (rh.entorhinal_1)(rh.fusiform_7)(rh.inferiorparietal_9)(rh.insula_5)                   |
| 0.00099 | 1.00E-05 | 0.92164 | 0.82212 | (Right-Putamen)(rh.bankssts_2)(rh.fusiform_7)(rh.precuneus_2)                          |
| 0.00099 | 1.00E-05 | 0.92164 | 0.82212 | (rh.fusiform_7)(rh.lingual_7)(rh.precuneus_2)                                          |
| 0.00099 | 1.00E-05 | 0.92164 | 0.82212 | (rh.bankssts_2)(rh.fusiform_7)(rh.insula_2)(rh.precuneus_2)                            |
| 0.00099 | 1.00E-05 | 0.92164 | 0.82212 | (rh.bankssts_2)(rh.fusiform_7)(rh.isthmuscingulate_2)(rh.precuneus_2)                  |

|         |          |         |         |                                                                                             |
|---------|----------|---------|---------|---------------------------------------------------------------------------------------------|
| 0.00099 | 1.00E-05 | 0.92164 | 0.82212 | (Right-Putamen)(rh.fusiform_7)(rh.lingual_7)(rh.precuneus_2)                                |
| 0.00099 | 1.00E-05 | 0.92164 | 0.82212 | (Right-Thalamus-Proper)(rh.fusiform_7)(rh.lingual_7)(rh.precuneus_2)                        |
| 0.00099 | 1.00E-05 | 0.92164 | 0.82212 | (rh.bankssts_2)(rh.fusiform_7)(rh.precuneus_2)                                              |
| 0.00099 | 1.00E-05 | 0.92164 | 0.82212 | (rh.fusiform_7)(rh.isthmuscingulate_2)(rh.lingual_7)(rh.precuneus_2)                        |
| 0.00099 | 1.00E-05 | 0.92164 | 0.82212 | (rh.fusiform_7)(rh.insula_2)(rh.lingual_7)(rh.precuneus_2)                                  |
| 0.00099 | 1.00E-05 | 0.92164 | 0.82212 | (Right-Thalamus-Proper)(rh.bankssts_2)(rh.fusiform_7)(rh.precuneus_2)                       |
| 0.00099 | 1.00E-05 | 0.90299 | 0.7963  | (rh.inferiorparietal_9)(rh.parahippocampal_2)(rh.precuneus_2)                               |
| 0.00099 | 1.00E-05 | 0.90299 | 0.7963  | (rh.inferiorparietal_9)(rh.insula_2)(rh.parahippocampal_2)                                  |
| 0.00104 | 1.00E-05 | 0.91791 | 0.81731 | (rh.fusiform_7)(rh.precuneus_2)(rh.superiortemporal_3)                                      |
| 0.00104 | 1.00E-05 | 0.91791 | 0.81731 | (rh.fusiform_7)(rh.insula_2)(rh.precuneus_2)(rh.superiortemporal_3)                         |
| 0.00104 | 1.00E-05 | 0.91791 | 0.81731 | (rh.fusiform_7)(rh.isthmuscingulate_2)(rh.precuneus_2)(rh.superiortemporal_3)               |
| 0.00104 | 1.00E-05 | 0.91791 | 0.81731 | (Right-Thalamus-Proper)(rh.fusiform_7)(rh.precuneus_2)(rh.superiortemporal_3)               |
| 0.00104 | 1.00E-05 | 0.91791 | 0.81731 | (Right-Putamen)(rh.fusiform_7)(rh.precuneus_2)(rh.superiortemporal_3)                       |
| 0.00107 | 1.00E-05 | 0.98881 | 0.93269 | (rh.bankssts_2)(rh.lingual_7)(rh.precuneus_2)(rh.superiortemporal_3)                        |
| 0.00107 | 1.00E-05 | 0.89552 | 0.78704 | (rh.inferiorparietal_9)(rh.superiortemporal_3)(rh.supramarginal_9)                          |
| 0.00107 | 1.00E-05 | 0.89552 | 0.78704 | (rh.inferiorparietal_10)(rh.inferiorparietal_9)(rh.superiortemporal_3)                      |
| 0.00112 | 1.00E-05 | 0.91045 | 0.80769 | (rh.fusiform_7)(rh.lingual_7)(rh.parahippocampal_2)(rh.precuneus_2)                         |
| 0.00112 | 1.00E-05 | 0.91045 | 0.80769 | (rh.bankssts_2)(rh.inferiorparietal_9)(rh.lingual_7)(rh.superiortemporal_3)                 |
| 0.00112 | 1.00E-05 | 0.91045 | 0.80769 | (rh.bankssts_2)(rh.fusiform_7)(rh.parahippocampal_2)(rh.precuneus_2)                        |
| 0.00113 | 1.00E-05 | 0.83582 | 0.71154 | (Right-Pallidum)(rh.fusiform_7)(rh.inferiorparietal_9)(rh.supramarginal_9)                  |
| 0.00115 | 1.00E-05 | 0.90672 | 0.80288 | (rh.fusiform_7)(rh.parahippocampal_2)(rh.precuneus_2)(rh.superiortemporal_3)                |
| 0.00115 | 1.00E-05 | 0.90672 | 0.80288 | (rh.bankssts_2)(rh.inferiorparietal_9)(rh.insula_2)(rh.precuneus_2)                         |
| 0.00116 | 1.00E-05 | 0.83955 | 0.71635 | (rh.fusiform_7)(rh.inferiorparietal_9)(rh.insula_5)(rh.superiortemporal_3)                  |
| 0.00118 | 1.00E-05 | 0.84328 | 0.72115 | (Right-Caudate)(rh.fusiform_7)(rh.inferiorparietal_9)                                       |
| 0.00118 | 1.00E-05 | 0.84328 | 0.72115 | (Right-Pallidum)(rh.fusiform_7)(rh.inferiorparietal_9)(rh.parahippocampal_2)                |
| 0.00118 | 1.00E-05 | 0.84328 | 0.72115 | (Right-Caudate)(Right-Putamen)(rh.fusiform_7)(rh.inferiorparietal_9)                        |
| 0.00118 | 1.00E-05 | 0.84328 | 0.72115 | (Right-Caudate)(Right-Thalamus-Proper)(rh.fusiform_7)(rh.inferiorparietal_9)                |
| 0.00118 | 1.00E-05 | 0.84328 | 0.72115 | (rh.fusiform_7)(rh.inferiorparietal_9)(rh.superiortemporal_3)(rh.superiortemporal_9)        |
| 0.00118 | 1.00E-05 | 0.84328 | 0.72115 | (Right-Caudate)(rh.fusiform_7)(rh.inferiorparietal_9)(rh.isthmuscingulate_2)                |
| 0.00118 | 1.00E-05 | 0.84328 | 0.72115 | (rh.fusiform_7)(rh.inferiorparietal_9)(rh.insula_5)(rh.lingual_7)                           |
| 0.00118 | 1.00E-05 | 0.84328 | 0.72115 | (Right-Caudate)(rh.fusiform_7)(rh.inferiorparietal_9)(rh.insula_2)                          |
| 0.00118 | 1.00E-05 | 0.84328 | 0.72115 | (rh.bankssts_2)(rh.fusiform_7)(rh.inferiorparietal_9)(rh.insula_5)                          |
| 0.00118 | 1.00E-05 | 0.90299 | 0.79808 | (rh.inferiorparietal_9)(rh.isthmuscingulate_2)(rh.parahippocampal_2)(rh.superiortemporal_3) |
| 0.00118 | 1.00E-05 | 0.90299 | 0.79808 | (Right-Putamen)(rh.inferiorparietal_9)(rh.parahippocampal_2)(rh.superiortemporal_3)         |
| 0.00118 | 1.00E-05 | 0.90299 | 0.79808 | (rh.bankssts_2)(rh.inferiorparietal_9)(rh.parahippocampal_2)(rh.precuneus_2)                |

|         |          |         |         |                                                                                         |
|---------|----------|---------|---------|-----------------------------------------------------------------------------------------|
| 0.00118 | 1.00E-05 | 0.90299 | 0.79808 | (Right-Thalamus-Proper)(rh.inferiorparietal_9)(rh.parahippocampal_2)(rh.superiortempor  |
| 0.00118 | 1.00E-05 | 0.90299 | 0.79808 | (rh.inferiorparietal_9)(rh.lingual_7)(rh.parahippocampal_2)(rh.precuneus_2)             |
| 0.0012  | 1.00E-05 | 0.84701 | 0.72596 | (rh.bankssts_2)(rh.fusiform_7)(rh.inferiorparietal_9)(rh.superiortemporal_9)            |
| 0.0012  | 1.00E-05 | 0.84701 | 0.72596 | (rh.fusiform_7)(rh.inferiorparietal_9)(rh.lingual_7)(rh.superiortemporal_9)             |
| 0.0012  | 1.00E-05 | 0.89925 | 0.79327 | (rh.inferiorparietal_9)(rh.insula_2)(rh.parahippocampal_2)(rh.superiortemporal_3)       |
| 0.00121 | 1.00E-05 | 0.85075 | 0.73077 | (Right-Pallidum)(rh.fusiform_7)(rh.inferiorparietal_9)(rh.insula_2)                     |
| 0.00121 | 1.00E-05 | 0.85075 | 0.73077 | (Right-Pallidum)(Right-Putamen)(rh.fusiform_7)(rh.inferiorparietal_9)                   |
| 0.00121 | 1.00E-05 | 0.85075 | 0.73077 | (Right-Pallidum)(Right-Thalamus-Proper)(rh.fusiform_7)(rh.inferiorparietal_9)           |
| 0.00121 | 1.00E-05 | 0.85075 | 0.73077 | (Right-Pallidum)(rh.fusiform_7)(rh.inferiorparietal_9)(rh.isthmuscingulate_2)           |
| 0.00121 | 1.00E-05 | 0.85075 | 0.73077 | (Right-Pallidum)(rh.fusiform_7)(rh.inferiorparietal_9)                                  |
| 0.00122 | 1.00E-05 | 0.89552 | 0.78846 | (Right-Caudate)(rh.inferiorparietal_9)(rh.parahippocampal_2)(rh.superiortemporal_3)     |
| 0.00122 | 1.00E-05 | 0.89552 | 0.78846 | (rh.fusiform_7)(rh.insula_5)(rh.parahippocampal_3)(rh.precuneus_2)                      |
| 0.00123 | 1.00E-05 | 0.85448 | 0.73558 | (rh.inferiorparietal_9)(rh.parahippocampal_3)(rh.precuneus_2)(rh.superiortemporal_3)    |
| 0.00124 | 1.00E-05 | 0.89179 | 0.78365 | (Right-Caudate)(rh.fusiform_7)(rh.parahippocampal_3)(rh.precuneus_2)                    |
| 0.00124 | 1.00E-05 | 0.85821 | 0.74038 | (rh.bankssts_2)(rh.inferiorparietal_9)(rh.parahippocampal_3)(rh.precuneus_2)            |
| 0.00124 | 1.00E-05 | 0.85821 | 0.74038 | (rh.fusiform_7)(rh.precuneus_2)(rh.precuneus_4)                                         |
| 0.00124 | 1.00E-05 | 0.85821 | 0.74038 | (rh.fusiform_7)(rh.insula_2)(rh.precuneus_2)(rh.precuneus_4)                            |
| 0.00124 | 1.00E-05 | 0.85821 | 0.74038 | (Right-Putamen)(rh.fusiform_7)(rh.precuneus_2)(rh.precuneus_4)                          |
| 0.00124 | 1.00E-05 | 0.85821 | 0.74038 | (Right-Thalamus-Proper)(rh.fusiform_7)(rh.precuneus_2)(rh.precuneus_4)                  |
| 0.00124 | 1.00E-05 | 0.85821 | 0.74038 | (rh.inferiorparietal_9)(rh.lingual_7)(rh.parahippocampal_3)(rh.precuneus_2)             |
| 0.00124 | 1.00E-05 | 0.85821 | 0.74038 | (rh.fusiform_7)(rh.isthmuscingulate_2)(rh.precuneus_2)(rh.precuneus_4)                  |
| 0.00125 | 1.00E-05 | 0.88806 | 0.77885 | (rh.inferiorparietal_9)(rh.parahippocampal_2)(rh.superiortemporal_3)(rh.supramarginal_! |
| 0.00126 | 1.00E-05 | 0.86567 | 0.75    | (rh.inferiorparietal_9)(rh.insula_5)(rh.parahippocampal_2)(rh.precuneus_2)              |
| 0.00127 | 1.00E-05 | 0.87313 | 0.75962 | (rh.entorhinal_1)(rh.fusiform_7)(rh.parahippocampal_3)(rh.precuneus_2)                  |
| 0.00137 | 1.00E-05 | 0.80597 | 0.67788 | (Right-Caudate)(rh.entorhinal_1)(rh.fusiform_7)(rh.inferiorparietal_9)                  |
| 0.00137 | 1.00E-05 | 0.80597 | 0.67788 | (rh.entorhinal_1)(rh.fusiform_7)(rh.inferiorparietal_9)(rh.insula_4)                    |
| 0.00145 | 1.00E-05 | 0.81343 | 0.6875  | (rh.bankssts_2)(rh.fusiform_7)(rh.isthmuscingulate_1)(rh.precuneus_4)                   |
| 0.00151 | 1.00E-05 | 0.97761 | 0.91346 | (rh.bankssts_2)(rh.parahippocampal_2)(rh.precuneus_2)(rh.superiortemporal_3)            |
| 0.00151 | 1.00E-05 | 0.97761 | 0.91346 | (rh.lingual_7)(rh.parahippocampal_2)(rh.precuneus_2)(rh.superiortemporal_3)             |
| 0.00154 | 1.00E-05 | 0.8209  | 0.69712 | (rh.fusiform_7)(rh.inferiorparietal_9)(rh.precuneus_2)(rh.superiortemporal_1)           |
| 0.00154 | 1.00E-05 | 0.8209  | 0.69712 | (rh.fusiform_7)(rh.inferiorparietal_10)(rh.inferiorparietal_9)(rh.parahippocampal_3)    |
| 0.00154 | 1.00E-05 | 0.8209  | 0.69712 | (rh.fusiform_7)(rh.fusiform_8)(rh.inferiorparietal_9)(rh.superiortemporal_3)            |
| 0.00154 | 1.00E-05 | 0.8209  | 0.69712 | (rh.fusiform_7)(rh.inferiorparietal_9)(rh.insula_4)(rh.parahippocampal_3)               |
| 0.00154 | 1.00E-05 | 0.8209  | 0.69712 | (rh.fusiform_7)(rh.inferiorparietal_4)(rh.inferiorparietal_9)(rh.parahippocampal_3)     |
| 0.00158 | 1.00E-05 | 0.82463 | 0.70192 | (rh.fusiform_7)(rh.fusiform_8)(rh.inferiorparietal_9)(rh.lingual_7)                     |

|         |          |         |         |                                                                                       |
|---------|----------|---------|---------|---------------------------------------------------------------------------------------|
| 0.00158 | 1.00E-05 | 0.82463 | 0.70192 | (rh.entorhinal_1)(rh.inferiorparietal_9)(rh.parahippocampal_3)(rh.precuneus_2)        |
| 0.00158 | 1.00E-05 | 0.82463 | 0.70192 | (rh.bankssts_2)(rh.fusiform_7)(rh.fusiform_8)(rh.inferiorparietal_9)                  |
| 0.00159 | 1.00E-05 | 0.89925 | 0.7963  | (rh.inferiorparietal_9)(rh.lingual_7)(rh.supramarginal_9)                             |
| 0.00159 | 1.00E-05 | 0.89925 | 0.7963  | (Right-Caudate)(rh.inferiorparietal_9)(rh.insula_2)(rh.lingual_7)                     |
| 0.00159 | 1.00E-05 | 0.89925 | 0.7963  | (Right-Caudate)(rh.bankssts_2)(rh.inferiorparietal_9)(rh.superiortemporal_3)          |
| 0.00159 | 1.00E-05 | 0.89925 | 0.7963  | (Right-Caudate)(rh.inferiorparietal_9)(rh.superiortemporal_3)                         |
| 0.00159 | 1.00E-05 | 0.89925 | 0.7963  | (Right-Caudate)(rh.inferiorparietal_9)(rh.lingual_7)(rh.precuneus_2)                  |
| 0.00159 | 1.00E-05 | 0.89925 | 0.7963  | (Right-Pallidum)(rh.inferiorparietal_9)(rh.lingual_7)(rh.precuneus_2)                 |
| 0.00159 | 1.00E-05 | 0.89925 | 0.7963  | (Right-Caudate)(rh.inferiorparietal_9)(rh.parahippocampal_2)                          |
| 0.00159 | 1.00E-05 | 0.89925 | 0.7963  | (rh.inferiorparietal_10)(rh.inferiorparietal_9)(rh.lingual_7)                         |
| 0.00159 | 1.00E-05 | 0.92164 | 0.82692 | (Right-Thalamus-Proper)(rh.fusiform_7)(rh.insula_2)(rh.precuneus_2)                   |
| 0.00159 | 1.00E-05 | 0.92164 | 0.82692 | (Right-Thalamus-Proper)(rh.fusiform_7)(rh.precuneus_2)                                |
| 0.00159 | 1.00E-05 | 0.92164 | 0.82692 | (Right-Thalamus-Proper)(rh.fusiform_7)(rh.isthmuscingulate_2)(rh.precuneus_2)         |
| 0.00159 | 1.00E-05 | 0.92164 | 0.82692 | (Right-Putamen)(Right-Thalamus-Proper)(rh.fusiform_7)(rh.precuneus_2)                 |
| 0.00159 | 1.00E-05 | 0.92164 | 0.82692 | (Right-Putamen)(rh.fusiform_7)(rh.isthmuscingulate_2)(rh.precuneus_2)                 |
| 0.00159 | 1.00E-05 | 0.92164 | 0.82692 | (rh.fusiform_7)(rh.insula_2)(rh.precuneus_2)                                          |
| 0.00159 | 1.00E-05 | 0.92164 | 0.82692 | (Right-Putamen)(rh.fusiform_7)(rh.insula_2)(rh.precuneus_2)                           |
| 0.00159 | 1.00E-05 | 0.92164 | 0.82692 | (rh.fusiform_7)(rh.insula_2)(rh.isthmuscingulate_2)(rh.precuneus_2)                   |
| 0.00159 | 1.00E-05 | 0.92164 | 0.82692 | (rh.fusiform_7)(rh.isthmuscingulate_2)(rh.precuneus_2)                                |
| 0.00159 | 1.00E-05 | 0.92164 | 0.82692 | (Right-Putamen)(rh.fusiform_7)(rh.precuneus_2)                                        |
| 0.00159 | 1.00E-05 | 0.92164 | 0.82692 | (rh.fusiform_7)(rh.precuneus_2)                                                       |
| 0.00162 | 1.00E-05 | 0.82836 | 0.70673 | (rh.fusiform_7)(rh.inferiorparietal_9)(rh.insula_5)(rh.supramarginal_9)               |
| 0.00162 | 1.00E-05 | 0.82836 | 0.70673 | (rh.entorhinal_1)(rh.inferiorparietal_9)(rh.precuneus_2)(rh.superiortemporal_3)       |
| 0.00162 | 1.00E-05 | 0.82836 | 0.70673 | (rh.fusiform_7)(rh.inferiorparietal_10)(rh.inferiorparietal_9)(rh.supramarginal_9)    |
| 0.00165 | 1.00E-05 | 0.83209 | 0.71154 | (rh.fusiform_8)(rh.inferiorparietal_9)(rh.parahippocampal_3)(rh.precuneus_2)          |
| 0.00165 | 1.00E-05 | 0.83209 | 0.71154 | (rh.bankssts_2)(rh.entorhinal_1)(rh.inferiorparietal_9)(rh.precuneus_2)               |
| 0.00165 | 1.00E-05 | 0.83209 | 0.71154 | (rh.entorhinal_1)(rh.inferiorparietal_9)(rh.lingual_7)(rh.precuneus_2)                |
| 0.00165 | 1.00E-05 | 0.83209 | 0.71154 | (rh.fusiform_7)(rh.inferiorparietal_9)(rh.superiortemporal_9)(rh.supramarginal_9)     |
| 0.00166 | 1.00E-05 | 0.91791 | 0.82212 | (Right-Pallidum)(rh.fusiform_7)(rh.lingual_7)(rh.precuneus_2)                         |
| 0.00166 | 1.00E-05 | 0.91791 | 0.82212 | (Right-Pallidum)(rh.bankssts_2)(rh.fusiform_7)(rh.precuneus_2)                        |
| 0.00168 | 1.00E-05 | 0.89179 | 0.78704 | (rh.inferiorparietal_9)(rh.parahippocampal_2)(rh.supramarginal_9)                     |
| 0.00168 | 1.00E-05 | 0.89179 | 0.78704 | (rh.inferiorparietal_10)(rh.inferiorparietal_9)(rh.parahippocampal_2)                 |
| 0.00169 | 1.00E-05 | 0.83582 | 0.71635 | (rh.fusiform_7)(rh.inferiorparietal_9)(rh.insula_5)(rh.parahippocampal_2)             |
| 0.00169 | 1.00E-05 | 0.83582 | 0.71635 | (rh.fusiform_7)(rh.inferiorparietal_10)(rh.inferiorparietal_9)(rh.superiortemporal_3) |
| 0.00169 | 1.00E-05 | 0.83582 | 0.71635 | (rh.inferiorparietal_9)(rh.parahippocampal_2)(rh.precuneus_4)(rh.superiortemporal_3)  |

|         |          |         |         |                                                                                      |
|---------|----------|---------|---------|--------------------------------------------------------------------------------------|
| 0.00171 | 1.00E-05 | 0.91418 | 0.81731 | (Right-Pallidum)(rh.fusiform_7)(rh.precuneus_2)(rh.superiortemporal_3)               |
| 0.00173 | 1.00E-05 | 0.83955 | 0.72115 | (rh.fusiform_7)(rh.inferiorparietal_9)(rh.parahippocampal_2)(rh.superiortemporal_9)  |
| 0.00173 | 1.00E-05 | 0.83955 | 0.72115 | (rh.bankssts_2)(rh.fusiform_7)(rh.inferiorparietal_10)(rh.inferiorparietal_9)        |
| 0.00173 | 1.00E-05 | 0.83955 | 0.72115 | (Right-Caudate)(Right-Pallidum)(rh.fusiform_7)(rh.inferiorparietal_9)                |
| 0.00173 | 1.00E-05 | 0.83955 | 0.72115 | (rh.fusiform_7)(rh.inferiorparietal_10)(rh.inferiorparietal_9)(rh.lingual_7)         |
| 0.00173 | 1.00E-05 | 0.83955 | 0.72115 | (rh.fusiform_7)(rh.parahippocampal_3)(rh.precuneus_4)(rh.superiortemporal_3)         |
| 0.00176 | 1.00E-05 | 0.84328 | 0.72596 | (rh.fusiform_7)(rh.inferiorparietal_9)(rh.insula_5)                                  |
| 0.00176 | 1.00E-05 | 0.84328 | 0.72596 | (rh.fusiform_7)(rh.inferiorparietal_9)(rh.insula_5)(rh.isthmuscingulate_2)           |
| 0.00176 | 1.00E-05 | 0.84328 | 0.72596 | (Right-Pallidum)(rh.fusiform_7)(rh.inferiorparietal_9)(rh.insula_5)                  |
| 0.00176 | 1.00E-05 | 0.84328 | 0.72596 | (rh.fusiform_7)(rh.inferiorparietal_9)(rh.insula_2)(rh.insula_5)                     |
| 0.00176 | 1.00E-05 | 0.84328 | 0.72596 | (Right-Putamen)(rh.fusiform_7)(rh.inferiorparietal_9)(rh.insula_5)                   |
| 0.00176 | 1.00E-05 | 0.84328 | 0.72596 | (Right-Thalamus-Proper)(rh.fusiform_7)(rh.inferiorparietal_9)(rh.insula_5)           |
| 0.00176 | 1.00E-05 | 0.84328 | 0.72596 | (rh.bankssts_2)(rh.fusiform_7)(rh.parahippocampal_3)(rh.precuneus_4)                 |
| 0.00176 | 1.00E-05 | 0.91045 | 0.8125  | (rh.fusiform_7)(rh.parahippocampal_2)(rh.precuneus_2)                                |
| 0.00176 | 1.00E-05 | 0.91045 | 0.8125  | (Right-Caudate)(rh.fusiform_7)(rh.lingual_7)(rh.precuneus_2)                         |
| 0.00176 | 1.00E-05 | 0.91045 | 0.8125  | (Right-Caudate)(rh.bankssts_2)(rh.fusiform_7)(rh.precuneus_2)                        |
| 0.00176 | 1.00E-05 | 0.91045 | 0.8125  | (Right-Thalamus-Proper)(rh.inferiorparietal_9)(rh.lingual_7)(rh.superiortemporal_3)  |
| 0.00176 | 1.00E-05 | 0.91045 | 0.8125  | (rh.fusiform_7)(rh.isthmuscingulate_2)(rh.parahippocampal_2)(rh.precuneus_2)         |
| 0.00176 | 1.00E-05 | 0.91045 | 0.8125  | (rh.bankssts_2)(rh.inferiorparietal_9)(rh.superiortemporal_3)                        |
| 0.00176 | 1.00E-05 | 0.91045 | 0.8125  | (Right-Putamen)(rh.bankssts_2)(rh.inferiorparietal_9)(rh.superiortemporal_3)         |
| 0.00176 | 1.00E-05 | 0.91045 | 0.8125  | (Right-Thalamus-Proper)(rh.fusiform_7)(rh.parahippocampal_2)(rh.precuneus_2)         |
| 0.00176 | 1.00E-05 | 0.91045 | 0.8125  | (rh.fusiform_7)(rh.insula_2)(rh.parahippocampal_2)(rh.precuneus_2)                   |
| 0.00176 | 1.00E-05 | 0.91045 | 0.8125  | (Right-Putamen)(rh.fusiform_7)(rh.parahippocampal_2)(rh.precuneus_2)                 |
| 0.00176 | 1.00E-05 | 0.91045 | 0.8125  | (Right-Putamen)(rh.inferiorparietal_9)(rh.lingual_7)(rh.superiortemporal_3)          |
| 0.00176 | 1.00E-05 | 0.91045 | 0.8125  | (rh.bankssts_2)(rh.inferiorparietal_9)(rh.isthmuscingulate_2)(rh.superiortemporal_3) |
| 0.00176 | 1.00E-05 | 0.91045 | 0.8125  | (rh.inferiorparietal_9)(rh.isthmuscingulate_2)(rh.lingual_7)(rh.superiortemporal_3)  |
| 0.00176 | 1.00E-05 | 0.91045 | 0.8125  | (Right-Thalamus-Proper)(rh.bankssts_2)(rh.inferiorparietal_9)(rh.superiortemporal_3) |
| 0.00176 | 1.00E-05 | 0.91045 | 0.8125  | (rh.bankssts_2)(rh.inferiorparietal_9)(rh.lingual_7)(rh.precuneus_2)                 |
| 0.00179 | 1.00E-05 | 0.84701 | 0.73077 | (rh.fusiform_7)(rh.inferiorparietal_9)(rh.isthmuscingulate_2)(rh.superiortemporal_9) |
| 0.00179 | 1.00E-05 | 0.84701 | 0.73077 | (Right-Pallidum)(rh.fusiform_7)(rh.inferiorparietal_9)(rh.superiortemporal_9)        |
| 0.00179 | 1.00E-05 | 0.84701 | 0.73077 | (Right-Thalamus-Proper)(rh.fusiform_7)(rh.inferiorparietal_9)(rh.superiortemporal_9) |
| 0.00179 | 1.00E-05 | 0.84701 | 0.73077 | (Right-Accumbens-area)(rh.fusiform_7)(rh.precuneus_2)(rh.superiortemporal_3)         |
| 0.00179 | 1.00E-05 | 0.84701 | 0.73077 | (Right-Putamen)(rh.fusiform_7)(rh.inferiorparietal_9)(rh.superiortemporal_9)         |
| 0.00179 | 1.00E-05 | 0.84701 | 0.73077 | (rh.fusiform_7)(rh.inferiorparietal_9)(rh.insula_2)(rh.superiortemporal_9)           |
| 0.00179 | 1.00E-05 | 0.84701 | 0.73077 | (rh.fusiform_7)(rh.inferiorparietal_9)(rh.superiortemporal_9)                        |



|         |          |         |         |                                                                                      |
|---------|----------|---------|---------|--------------------------------------------------------------------------------------|
| 0.0018  | 1.00E-05 | 0.90672 | 0.80769 | (rh.bankssts_2)(rh.fusiform_7)(rh.lingual_7)(rh.parahippocampal_3)                   |
| 0.0018  | 1.00E-05 | 0.90672 | 0.80769 | (Right-Putamen)(rh.inferiorparietal_9)(rh.insula_2)(rh.precuneus_2)                  |
| 0.0018  | 1.00E-05 | 0.90672 | 0.80769 | (Right-Thalamus-Proper)(rh.inferiorparietal_9)(rh.insula_2)(rh.precuneus_2)          |
| 0.0018  | 1.00E-05 | 0.90672 | 0.80769 | (rh.bankssts_2)(rh.inferiorparietal_9)(rh.insula_2)(rh.superiortemporal_3)           |
| 0.0018  | 1.00E-05 | 0.90672 | 0.80769 | (rh.inferiorparietal_9)(rh.insula_2)(rh.isthmuscingulate_2)(rh.precuneus_2)          |
| 0.0018  | 1.00E-05 | 0.90672 | 0.80769 | (rh.fusiform_7)(rh.lingual_7)(rh.precuneus_2)(rh.supramarginal_9)                    |
| 0.0018  | 1.00E-05 | 0.90672 | 0.80769 | (rh.inferiorparietal_9)(rh.insula_2)(rh.precuneus_2)                                 |
| 0.0018  | 1.00E-05 | 0.90672 | 0.80769 | (Right-Caudate)(rh.fusiform_7)(rh.precuneus_2)(rh.superiortemporal_3)                |
| 0.0018  | 1.00E-05 | 0.90672 | 0.80769 | (rh.inferiorparietal_9)(rh.insula_2)(rh.lingual_7)(rh.superiortemporal_3)            |
| 0.0018  | 1.00E-05 | 0.90672 | 0.80769 | (rh.bankssts_2)(rh.fusiform_7)(rh.precuneus_2)(rh.supramarginal_9)                   |
| 0.00182 | 1.00E-05 | 0.85075 | 0.73558 | (rh.inferiorparietal_9)(rh.insula_5)(rh.parahippocampal_3)(rh.precuneus_2)           |
| 0.00182 | 1.00E-05 | 0.85075 | 0.73558 | (rh.fusiform_7)(rh.inferiortemporal_2)(rh.parahippocampal_3)(rh.precuneus_2)         |
| 0.00182 | 1.00E-05 | 0.85075 | 0.73558 | (rh.inferiorparietal_9)(rh.parahippocampal_2)(rh.parahippocampal_3)(rh.precuneus_2)  |
| 0.00182 | 1.00E-05 | 0.85075 | 0.73558 | (Right-Accumbens-area)(rh.bankssts_2)(rh.fusiform_7)(rh.precuneus_2)                 |
| 0.00184 | 1.00E-05 | 0.90299 | 0.80288 | (rh.inferiorparietal_9)(rh.isthmuscingulate_2)(rh.parahippocampal_2)(rh.precuneus_2) |
| 0.00184 | 1.00E-05 | 0.90299 | 0.80288 | (Right-Caudate)(rh.fusiform_7)(rh.parahippocampal_2)(rh.precuneus_2)                 |
| 0.00184 | 1.00E-05 | 0.90299 | 0.80288 | (rh.bankssts_2)(rh.fusiform_7)(rh.parahippocampal_3)(rh.superiortemporal_3)          |
| 0.00184 | 1.00E-05 | 0.90299 | 0.80288 | (Right-Putamen)(rh.inferiorparietal_9)(rh.parahippocampal_2)(rh.precuneus_2)         |
| 0.00184 | 1.00E-05 | 0.90299 | 0.80288 | (Right-Thalamus-Proper)(rh.inferiorparietal_9)(rh.parahippocampal_2)(rh.precuneus_2) |
| 0.00184 | 1.00E-05 | 0.90299 | 0.80288 | (rh.fusiform_7)(rh.lingual_7)(rh.parahippocampal_3)(rh.superiortemporal_3)           |
| 0.00184 | 1.00E-05 | 0.90299 | 0.80288 | (rh.fusiform_7)(rh.precuneus_2)(rh.superiortemporal_3)(rh.supramarginal_9)           |
| 0.00185 | 1.00E-05 | 0.85448 | 0.74038 | (Right-Pallidum)(rh.fusiform_7)(rh.precuneus_2)(rh.precuneus_4)                      |
| 0.00186 | 1.00E-05 | 0.83209 | 0.71296 | (rh.inferiorparietal_9)(rh.isthmuscingulate_1)(rh.supramarginal_9)                   |
| 0.00187 | 1.00E-05 | 0.85821 | 0.74519 | (rh.inferiorparietal_9)(rh.parahippocampal_3)(rh.precuneus_2)                        |
| 0.00187 | 1.00E-05 | 0.85821 | 0.74519 | (Right-Pallidum)(rh.inferiorparietal_9)(rh.parahippocampal_3)(rh.precuneus_2)        |
| 0.00187 | 1.00E-05 | 0.85821 | 0.74519 | (Right-Putamen)(rh.inferiorparietal_9)(rh.parahippocampal_3)(rh.precuneus_2)         |
| 0.00187 | 1.00E-05 | 0.85821 | 0.74519 | (rh.inferiorparietal_9)(rh.insula_2)(rh.parahippocampal_3)(rh.precuneus_2)           |
| 0.00187 | 1.00E-05 | 0.85821 | 0.74519 | (rh.inferiorparietal_9)(rh.isthmuscingulate_2)(rh.parahippocampal_3)(rh.precuneus_2) |
| 0.00187 | 1.00E-05 | 0.85821 | 0.74519 | (rh.fusiform_7)(rh.parahippocampal_3)(rh.precuneus_2)(rh.superiortemporal_6)         |
| 0.00187 | 1.00E-05 | 0.85821 | 0.74519 | (Right-Thalamus-Proper)(rh.inferiorparietal_9)(rh.parahippocampal_3)(rh.precuneus_2) |
| 0.00188 | 1.00E-05 | 0.83955 | 0.72222 | (rh.fusiform_7)(rh.inferiorparietal_9)(rh.supramarginal_9)                           |
| 0.0019  | 1.00E-05 | 0.89552 | 0.79327 | (Right-Pallidum)(rh.inferiorparietal_9)(rh.precuneus_2)(rh.superiortemporal_3)       |
| 0.0019  | 1.00E-05 | 0.89552 | 0.79327 | (Right-Caudate)(rh.inferiorparietal_9)(rh.parahippocampal_2)(rh.precuneus_2)         |
| 0.0019  | 1.00E-05 | 0.89552 | 0.79327 | (rh.fusiform_7)(rh.parahippocampal_3)(rh.precuneus_2)(rh.superiortemporal_9)         |
| 0.0019  | 1.00E-05 | 0.89552 | 0.79327 | (rh.inferiorparietal_9)(rh.lingual_7)(rh.superiortemporal_3)(rh.supramarginal_9)     |

|         |          |         |         |                                                                                   |
|---------|----------|---------|---------|-----------------------------------------------------------------------------------|
| 0.0019  | 1.00E-05 | 0.89552 | 0.79327 | (rh.bankssts_2)(rh.inferiorparietal_9)(rh.superiortemporal_3)(rh.supramarginal_9) |
| 0.0019  | 1.00E-05 | 0.85448 | 0.74074 | (rh.fusiform_7)(rh.inferiorparietal_9)                                            |
| 0.00191 | 1.00E-05 | 0.89179 | 0.78846 | (rh.fusiform_7)(rh.parahippocampal_2)(rh.parahippocampal_3)(rh.precuneus_2)       |
| 0.00192 | 1.00E-05 | 0.8694  | 0.75962 | (rh.inferiorparietal_9)(rh.insula_5)(rh.precuneus_2)(rh.superiortemporal_3)       |
| 0.00193 | 1.00E-05 | 0.88806 | 0.78365 | (rh.fusiform_7)(rh.inferiorparietal_4)(rh.parahippocampal_3)(rh.precuneus_2)      |
| 0.00193 | 1.00E-05 | 0.88806 | 0.78365 | (rh.fusiform_7)(rh.parahippocampal_3)(rh.precuneus_2)(rh.supramarginal_9)         |
| 0.00193 | 1.00E-05 | 0.87313 | 0.76442 | (rh.bankssts_2)(rh.inferiorparietal_9)(rh.insula_5)(rh.precuneus_2)               |
| 0.00193 | 1.00E-05 | 0.87313 | 0.76442 | (rh.inferiorparietal_9)(rh.insula_5)(rh.lingual_7)(rh.precuneus_2)                |
| 0.00194 | 1.00E-05 | 0.87687 | 0.76923 | (rh.entorhinal_1)(rh.fusiform_7)(rh.precuneus_2)(rh.superiortemporal_3)           |
| 0.00194 | 1.00E-05 | 0.8806  | 0.77404 | (rh.entorhinal_1)(rh.fusiform_7)(rh.lingual_7)(rh.precuneus_2)                    |
| 0.00194 | 1.00E-05 | 0.8806  | 0.77404 | (rh.bankssts_2)(rh.entorhinal_1)(rh.fusiform_7)(rh.precuneus_2)                   |
| 0.002   | 1.00E-05 | 0.80597 | 0.68269 | (Right-Caudate)(rh.fusiform_7)(rh.isthmuscingulate_1)(rh.precuneus_4)             |
| 0.00207 | 1.00E-05 | 0.98881 | 0.9375  | (Right-Thalamus-Proper)(rh.lingual_7)(rh.precuneus_2)(rh.superiortemporal_3)      |
| 0.00207 | 1.00E-05 | 0.98881 | 0.9375  | (Right-Putamen)(rh.lingual_7)(rh.precuneus_2)(rh.superiortemporal_3)              |
| 0.00207 | 1.00E-05 | 0.98881 | 0.9375  | (rh.lingual_7)(rh.precuneus_2)(rh.superiortemporal_3)                             |
| 0.00207 | 1.00E-05 | 0.98881 | 0.9375  | (rh.bankssts_2)(rh.precuneus_2)(rh.superiortemporal_3)                            |
| 0.00207 | 1.00E-05 | 0.98881 | 0.9375  | (rh.bankssts_2)(rh.isthmuscingulate_2)(rh.precuneus_2)(rh.superiortemporal_3)     |
| 0.00207 | 1.00E-05 | 0.98881 | 0.9375  | (Right-Putamen)(rh.bankssts_2)(rh.precuneus_2)(rh.superiortemporal_3)             |
| 0.00207 | 1.00E-05 | 0.98881 | 0.9375  | (rh.isthmuscingulate_2)(rh.lingual_7)(rh.precuneus_2)(rh.superiortemporal_3)      |
| 0.00207 | 1.00E-05 | 0.98881 | 0.9375  | (Right-Thalamus-Proper)(rh.bankssts_2)(rh.precuneus_2)(rh.superiortemporal_3)     |
| 0.00207 | 1.00E-05 | 0.8097  | 0.6875  | (rh.fusiform_7)(rh.inferiorparietal_9)(rh.parahippocampal_3)(rh.precuneus_3)      |
| 0.00207 | 1.00E-05 | 0.8097  | 0.6875  | (rh.fusiform_7)(rh.fusiform_8)(rh.inferiorparietal_9)(rh.supramarginal_9)         |
| 0.00207 | 1.00E-05 | 0.8097  | 0.6875  | (rh.inferiorparietal_9)(rh.insula_5)(rh.precuneus_2)(rh.precuneus_4)              |
| 0.00213 | 1.00E-05 | 0.81343 | 0.69231 | (rh.fusiform_7)(rh.insula_2)(rh.isthmuscingulate_1)(rh.precuneus_4)               |
| 0.00213 | 1.00E-05 | 0.81343 | 0.69231 | (Right-Putamen)(rh.fusiform_7)(rh.isthmuscingulate_1)(rh.precuneus_4)             |
| 0.00213 | 1.00E-05 | 0.81343 | 0.69231 | (Right-Thalamus-Proper)(rh.fusiform_7)(rh.isthmuscingulate_1)(rh.precuneus_4)     |
| 0.00213 | 1.00E-05 | 0.81343 | 0.69231 | (rh.fusiform_7)(rh.isthmuscingulate_1)(rh.isthmuscingulate_2)(rh.precuneus_4)     |
| 0.00219 | 1.00E-05 | 0.81716 | 0.69712 | (rh.fusiform_7)(rh.fusiform_8)(rh.inferiorparietal_9)(rh.parahippocampal_2)       |
| 0.00226 | 1.00E-05 | 0.8209  | 0.70192 | (rh.fusiform_7)(rh.inferiorparietal_9)(rh.superiortemporal_1)(rh.supramarginal_9) |
| 0.00229 | 1.00E-05 | 0.97015 | 0.90385 | (Right-Caudate)(rh.parahippocampal_2)(rh.precuneus_2)(rh.superiortemporal_3)      |
| 0.00232 | 1.00E-05 | 0.82463 | 0.70673 | (rh.fusiform_7)(rh.fusiform_8)(rh.inferiorparietal_9)(rh.superiortemporal_9)      |
| 0.00232 | 1.00E-05 | 0.82463 | 0.70673 | (rh.fusiform_7)(rh.fusiform_8)(rh.inferiorparietal_9)                             |
| 0.00232 | 1.00E-05 | 0.82463 | 0.70673 | (Right-Thalamus-Proper)(rh.fusiform_7)(rh.fusiform_8)(rh.inferiorparietal_9)      |
| 0.00232 | 1.00E-05 | 0.82463 | 0.70673 | (Right-Pallidum)(rh.fusiform_7)(rh.fusiform_8)(rh.inferiorparietal_9)             |
| 0.00232 | 1.00E-05 | 0.82463 | 0.70673 | (rh.entorhinal_1)(rh.inferiorparietal_9)(rh.parahippocampal_2)(rh.precuneus_2)    |

|         |          |         |         |                                                                                       |
|---------|----------|---------|---------|---------------------------------------------------------------------------------------|
| 0.00232 | 1.00E-05 | 0.82463 | 0.70673 | (Right-Putamen)(rh.fusiform_7)(rh.fusiform_8)(rh.inferiorparietal_9)                  |
| 0.00232 | 1.00E-05 | 0.82463 | 0.70673 | (rh.fusiform_7)(rh.fusiform_8)(rh.parahippocampal_3)(rh.precuneus_4)                  |
| 0.00232 | 1.00E-05 | 0.82463 | 0.70673 | (rh.fusiform_7)(rh.fusiform_8)(rh.inferiorparietal_9)(rh.insula_2)                    |
| 0.00232 | 1.00E-05 | 0.82463 | 0.70673 | (rh.fusiform_7)(rh.fusiform_8)(rh.inferiorparietal_9)(rh.isthmuscingulate_2)          |
| 0.00232 | 1.00E-05 | 0.82463 | 0.70673 | (rh.fusiform_7)(rh.inferiorparietal_9)(rh.precuneus_3)(rh.superiortemporal_3)         |
| 0.00238 | 1.00E-05 | 0.82836 | 0.71154 | (rh.fusiform_7)(rh.inferiorparietal_9)(rh.lingual_7)(rh.precuneus_3)                  |
| 0.00238 | 1.00E-05 | 0.82836 | 0.71154 | (rh.bankssts_2)(rh.fusiform_7)(rh.inferiorparietal_9)(rh.precuneus_3)                 |
| 0.00244 | 1.00E-05 | 0.83209 | 0.71635 | (Right-Putamen)(rh.entorhinal_1)(rh.inferiorparietal_9)(rh.precuneus_2)               |
| 0.00244 | 1.00E-05 | 0.83209 | 0.71635 | (rh.entorhinal_1)(rh.inferiorparietal_9)(rh.precuneus_2)(rh.superiortemporal_9)       |
| 0.00244 | 1.00E-05 | 0.83209 | 0.71635 | (rh.entorhinal_1)(rh.inferiorparietal_9)(rh.precuneus_2)                              |
| 0.00244 | 1.00E-05 | 0.83209 | 0.71635 | (Right-Caudate)(rh.fusiform_7)(rh.inferiorparietal_9)(rh.insula_5)                    |
| 0.00244 | 1.00E-05 | 0.83209 | 0.71635 | (rh.inferiorparietal_9)(rh.isthmuscingulate_1)(rh.precuneus_2)(rh.superiortemporal_3) |
| 0.00244 | 1.00E-05 | 0.83209 | 0.71635 | (rh.fusiform_7)(rh.inferiorparietal_4)(rh.inferiorparietal_9)(rh.superiortemporal_3)  |
| 0.00244 | 1.00E-05 | 0.83209 | 0.71635 | (rh.fusiform_7)(rh.parahippocampal_3)(rh.precuneus_4)(rh.supramarginal_9)             |
| 0.00244 | 1.00E-05 | 0.83209 | 0.71635 | (rh.entorhinal_1)(rh.inferiorparietal_9)(rh.insula_2)(rh.precuneus_2)                 |
| 0.00244 | 1.00E-05 | 0.83209 | 0.71635 | (rh.entorhinal_1)(rh.inferiorparietal_9)(rh.isthmuscingulate_2)(rh.precuneus_2)       |
| 0.00244 | 1.00E-05 | 0.83209 | 0.71635 | (Right-Caudate)(rh.fusiform_7)(rh.inferiorparietal_10)(rh.inferiorparietal_9)         |
| 0.00244 | 1.00E-05 | 0.83209 | 0.71635 | (rh.fusiform_7)(rh.inferiorparietal_9)(rh.insula_4)(rh.superiortemporal_3)            |
| 0.00244 | 1.00E-05 | 0.83209 | 0.71635 | (rh.inferiorparietal_9)(rh.precuneus_4)(rh.superiortemporal_3)(rh.supramarginal_9)    |
| 0.00244 | 1.00E-05 | 0.83209 | 0.71635 | (Right-Thalamus-Proper)(rh.entorhinal_1)(rh.inferiorparietal_9)(rh.precuneus_2)       |
| 0.00244 | 1.00E-05 | 0.83209 | 0.71635 | (Right-Pallidum)(rh.entorhinal_1)(rh.inferiorparietal_9)(rh.precuneus_2)              |
| 0.00244 | 1.00E-05 | 0.83209 | 0.71635 | (rh.fusiform_7)(rh.inferiorparietal_10)(rh.inferiorparietal_9)(rh.parahippocampal_2)  |
| 0.00248 | 1.00E-05 | 0.89552 | 0.7963  | (rh.inferiorparietal_9)(rh.precuneus_2)(rh.supramarginal_9)                           |
| 0.00248 | 1.00E-05 | 0.89552 | 0.7963  | (rh.inferiorparietal_10)(rh.inferiorparietal_9)(rh.insula_2)                          |
| 0.00248 | 1.00E-05 | 0.89552 | 0.7963  | (Right-Caudate)(rh.inferiorparietal_9)(rh.insula_2)(rh.precuneus_2)                   |
| 0.00248 | 1.00E-05 | 0.89552 | 0.7963  | (Right-Pallidum)(rh.inferiorparietal_9)(rh.parahippocampal_2)                         |
| 0.00248 | 1.00E-05 | 0.89552 | 0.7963  | (rh.inferiorparietal_9)(rh.insula_2)(rh.supramarginal_9)                              |
| 0.00248 | 1.00E-05 | 0.89552 | 0.7963  | (rh.inferiorparietal_10)(rh.inferiorparietal_9)(rh.precuneus_2)                       |
| 0.00249 | 1.00E-05 | 0.83582 | 0.72115 | (rh.bankssts_2)(rh.fusiform_7)(rh.inferiorparietal_4)(rh.inferiorparietal_9)          |
| 0.00249 | 1.00E-05 | 0.83582 | 0.72115 | (rh.fusiform_7)(rh.inferiorparietal_9)(rh.insula_4)(rh.insula_5)                      |
| 0.00249 | 1.00E-05 | 0.83582 | 0.72115 | (rh.fusiform_7)(rh.inferiorparietal_4)(rh.inferiorparietal_9)(rh.lingual_7)           |
| 0.00249 | 1.00E-05 | 0.83582 | 0.72115 | (Right-Caudate)(rh.fusiform_7)(rh.parahippocampal_3)(rh.precuneus_4)                  |
| 0.00249 | 1.00E-05 | 0.83582 | 0.72115 | (rh.fusiform_7)(rh.inferiorparietal_9)(rh.insula_4)(rh.lingual_7)                     |
| 0.00249 | 1.00E-05 | 0.83582 | 0.72115 | (rh.bankssts_2)(rh.fusiform_7)(rh.inferiorparietal_9)(rh.insula_4)                    |
| 0.00249 | 1.00E-05 | 0.83582 | 0.72115 | (Right-Caudate)(rh.fusiform_7)(rh.inferiorparietal_9)(rh.superiortemporal_9)          |

|         |          |         |         |                                                                                       |
|---------|----------|---------|---------|---------------------------------------------------------------------------------------|
| 0.00249 | 1.00E-05 | 0.83582 | 0.72115 | (rh.inferiorparietal_9)(rh.parahippocampal_2)(rh.precuneus_2)(rh.precuneus_4)         |
| 0.00253 | 1.00E-05 | 0.92164 | 0.83173 | (rh.bankssts_2)(rh.fusiform_7)(rh.lingual_7)(rh.superiortemporal_3)                   |
| 0.00255 | 1.00E-05 | 0.83955 | 0.72596 | (rh.fusiform_7)(rh.inferiorparietal_9)(rh.insula_5)(rh.superiortemporal_9)            |
| 0.00255 | 1.00E-05 | 0.83955 | 0.72596 | (rh.fusiform_7)(rh.inferiorparietal_10)(rh.inferiorparietal_9)(rh.insula_2)           |
| 0.00255 | 1.00E-05 | 0.83955 | 0.72596 | (Right-Thalamus-Proper)(rh.fusiform_7)(rh.inferiorparietal_10)(rh.inferiorparietal_9) |
| 0.00255 | 1.00E-05 | 0.83955 | 0.72596 | (rh.fusiform_7)(rh.inferiorparietal_10)(rh.inferiorparietal_9)                        |
| 0.00255 | 1.00E-05 | 0.83955 | 0.72596 | (rh.fusiform_7)(rh.inferiorparietal_10)(rh.inferiorparietal_9)(rh.isthmuscingulate_2) |
| 0.00255 | 1.00E-05 | 0.83955 | 0.72596 | (rh.inferiorparietal_9)(rh.insula_2)(rh.precuneus_2)(rh.precuneus_4)                  |
| 0.00255 | 1.00E-05 | 0.83955 | 0.72596 | (Right-Putamen)(rh.fusiform_7)(rh.inferiorparietal_10)(rh.inferiorparietal_9)         |
| 0.00259 | 1.00E-05 | 0.88806 | 0.78704 | (rh.inferiorparietal_10)(rh.inferiorparietal_9)(rh.supramarginal_9)                   |
| 0.0026  | 1.00E-05 | 0.84328 | 0.73077 | (rh.inferiorparietal_9)(rh.lingual_7)(rh.precuneus_4)(rh.superiortemporal_3)          |
| 0.0026  | 1.00E-05 | 0.84328 | 0.73077 | (Right-Pallidum)(rh.fusiform_7)(rh.parahippocampal_3)(rh.precuneus_4)                 |
| 0.0026  | 1.00E-05 | 0.84328 | 0.73077 | (rh.bankssts_2)(rh.inferiorparietal_9)(rh.precuneus_4)(rh.superiortemporal_3)         |
| 0.0026  | 1.00E-05 | 0.84328 | 0.73077 | (Right-Putamen)(rh.fusiform_7)(rh.parahippocampal_3)(rh.precuneus_4)                  |
| 0.0026  | 1.00E-05 | 0.84328 | 0.73077 | (Right-Thalamus-Proper)(rh.fusiform_7)(rh.parahippocampal_3)(rh.precuneus_4)          |
| 0.0026  | 1.00E-05 | 0.84328 | 0.73077 | (rh.fusiform_7)(rh.isthmuscingulate_1)(rh.precuneus_2)(rh.superiortemporal_3)         |
| 0.0026  | 1.00E-05 | 0.84328 | 0.73077 | (rh.fusiform_7)(rh.isthmuscingulate_2)(rh.parahippocampal_3)(rh.precuneus_4)          |
| 0.0026  | 1.00E-05 | 0.84328 | 0.73077 | (rh.fusiform_7)(rh.insula_2)(rh.parahippocampal_3)(rh.precuneus_4)                    |
| 0.00261 | 1.00E-05 | 0.91791 | 0.82692 | (Right-Pallidum)(rh.fusiform_7)(rh.isthmuscingulate_2)(rh.precuneus_2)                |
| 0.00261 | 1.00E-05 | 0.91791 | 0.82692 | (Right-Pallidum)(Right-Putamen)(rh.fusiform_7)(rh.precuneus_2)                        |
| 0.00261 | 1.00E-05 | 0.91791 | 0.82692 | (Right-Pallidum)(Right-Thalamus-Proper)(rh.fusiform_7)(rh.precuneus_2)                |
| 0.00261 | 1.00E-05 | 0.91791 | 0.82692 | (Right-Pallidum)(rh.fusiform_7)(rh.insula_2)(rh.precuneus_2)                          |
| 0.00261 | 1.00E-05 | 0.91791 | 0.82692 | (Right-Pallidum)(rh.fusiform_7)(rh.precuneus_2)                                       |
| 0.00265 | 1.00E-05 | 0.84701 | 0.73558 | (Right-Caudate)(rh.inferiorparietal_9)(rh.parahippocampal_3)(rh.precuneus_2)          |
| 0.00265 | 1.00E-05 | 0.84701 | 0.73558 | (rh.bankssts_2)(rh.fusiform_7)(rh.isthmuscingulate_1)(rh.precuneus_2)                 |
| 0.00265 | 1.00E-05 | 0.84701 | 0.73558 | (rh.fusiform_7)(rh.precuneus_4)(rh.superiortemporal_3)(rh.supramarginal_9)            |
| 0.00265 | 1.00E-05 | 0.84701 | 0.73558 | (rh.fusiform_7)(rh.insula_5)(rh.precuneus_2)(rh.precuneus_4)                          |
| 0.0027  | 1.00E-05 | 0.85075 | 0.74038 | (Right-Accumbens-area)(rh.fusiform_7)(rh.insula_2)(rh.precuneus_2)                    |
| 0.0027  | 1.00E-05 | 0.85075 | 0.74038 | (rh.bankssts_1)(rh.inferiorparietal_9)(rh.precuneus_2)(rh.superiortemporal_3)         |
| 0.0027  | 1.00E-05 | 0.85075 | 0.74038 | (rh.fusiform_7)(rh.lingual_7)(rh.precuneus_4)(rh.supramarginal_9)                     |
| 0.0027  | 1.00E-05 | 0.85075 | 0.74038 | (Right-Accumbens-area)(Right-Pallidum)(rh.fusiform_7)(rh.precuneus_2)                 |
| 0.0027  | 1.00E-05 | 0.85075 | 0.74038 | (Right-Accumbens-area)(rh.fusiform_7)(rh.isthmuscingulate_2)(rh.precuneus_2)          |
| 0.0027  | 1.00E-05 | 0.85075 | 0.74038 | (Right-Accumbens-area)(Right-Putamen)(rh.fusiform_7)(rh.precuneus_2)                  |
| 0.0027  | 1.00E-05 | 0.85075 | 0.74038 | (Right-Accumbens-area)(Right-Thalamus-Proper)(rh.fusiform_7)(rh.precuneus_2)          |
| 0.0027  | 1.00E-05 | 0.85075 | 0.74038 | (rh.bankssts_2)(rh.fusiform_7)(rh.precuneus_4)(rh.supramarginal_9)                    |

|         |          |         |         |                                                                                              |
|---------|----------|---------|---------|----------------------------------------------------------------------------------------------|
| 0.0027  | 1.00E-05 | 0.85075 | 0.74038 | (Right-Accumbens-area)(rh.fusiform_7)(rh.precuneus_2)                                        |
| 0.0027  | 1.00E-05 | 0.85075 | 0.74038 | (rh.inferiorparietal_9)(rh.parahippocampal_3)(rh.precuneus_2)(rh.superiortemporal_9)         |
| 0.00271 | 1.00E-05 | 0.83582 | 0.72222 | (rh.inferiorparietal_9)(rh.precuneus_4)(rh.supramarginal_9)                                  |
| 0.00274 | 1.00E-05 | 0.85448 | 0.74519 | (rh.fusiform_7)(rh.fusiform_8)(rh.precuneus_2)(rh.superiortemporal_6)                        |
| 0.00275 | 1.00E-05 | 0.97761 | 0.91827 | (Right-Putamen)(rh.parahippocampal_2)(rh.precuneus_2)(rh.superiortemporal_3)                 |
| 0.00275 | 1.00E-05 | 0.97761 | 0.91827 | (rh.parahippocampal_2)(rh.precuneus_2)(rh.superiortemporal_3)                                |
| 0.00275 | 1.00E-05 | 0.97761 | 0.91827 | (Right-Thalamus-Proper)(rh.parahippocampal_2)(rh.precuneus_2)(rh.superiortemporal_3)         |
| 0.00275 | 1.00E-05 | 0.97761 | 0.91827 | (rh.isthmuscingulate_2)(rh.parahippocampal_2)(rh.precuneus_2)(rh.superiortemporal_3)         |
| 0.00275 | 1.00E-05 | 0.91045 | 0.81731 | (rh.bankssts_2)(rh.inferiorparietal_9)(rh.precuneus_2)                                       |
| 0.00275 | 1.00E-05 | 0.91045 | 0.81731 | (rh.inferiorparietal_9)(rh.isthmuscingulate_2)(rh.superiortemporal_3)                        |
| 0.00275 | 1.00E-05 | 0.91045 | 0.81731 | (Right-Putamen)(rh.inferiorparietal_9)(rh.lingual_7)(rh.precuneus_2)                         |
| 0.00275 | 1.00E-05 | 0.91045 | 0.81731 | (Right-Putamen)(rh.inferiorparietal_9)(rh.isthmuscingulate_2)(rh.superiortemporal_3)         |
| 0.00275 | 1.00E-05 | 0.91045 | 0.81731 | (rh.inferiorparietal_9)(rh.isthmuscingulate_2)(rh.lingual_7)(rh.precuneus_2)                 |
| 0.00275 | 1.00E-05 | 0.91045 | 0.81731 | (Right-Thalamus-Proper)(rh.inferiorparietal_9)(rh.superiortemporal_3)                        |
| 0.00275 | 1.00E-05 | 0.91045 | 0.81731 | (Right-Putamen)(rh.inferiorparietal_9)(rh.superiortemporal_3)                                |
| 0.00275 | 1.00E-05 | 0.91045 | 0.81731 | (Right-Putamen)(rh.bankssts_2)(rh.inferiorparietal_9)(rh.precuneus_2)                        |
| 0.00275 | 1.00E-05 | 0.91045 | 0.81731 | (rh.fusiform_7)(rh.insula_5)(rh.lingual_7)(rh.precuneus_2)                                   |
| 0.00275 | 1.00E-05 | 0.91045 | 0.81731 | (Right-Caudate)(rh.fusiform_7)(rh.insula_2)(rh.precuneus_2)                                  |
| 0.00275 | 1.00E-05 | 0.91045 | 0.81731 | (Right-Caudate)(Right-Putamen)(rh.fusiform_7)(rh.precuneus_2)                                |
| 0.00275 | 1.00E-05 | 0.91045 | 0.81731 | (Right-Caudate)(rh.fusiform_7)(rh.precuneus_2)                                               |
| 0.00275 | 1.00E-05 | 0.91045 | 0.81731 | (Right-Putamen)(Right-Thalamus-Proper)(rh.inferiorparietal_9)(rh.superiortemporal_3)         |
| 0.00275 | 1.00E-05 | 0.91045 | 0.81731 | (rh.inferiorparietal_9)(rh.superiortemporal_3)                                               |
| 0.00275 | 1.00E-05 | 0.91045 | 0.81731 | (rh.inferiorparietal_9)(rh.lingual_7)(rh.precuneus_2)                                        |
| 0.00275 | 1.00E-05 | 0.91045 | 0.81731 | (Right-Thalamus-Proper)(rh.bankssts_2)(rh.inferiorparietal_9)(rh.precuneus_2)                |
| 0.00275 | 1.00E-05 | 0.91045 | 0.81731 | (Right-Thalamus-Proper)(rh.inferiorparietal_9)(rh.isthmuscingulate_2)(rh.superiortemporal_3) |
| 0.00275 | 1.00E-05 | 0.91045 | 0.81731 | (rh.bankssts_2)(rh.inferiorparietal_9)(rh.isthmuscingulate_2)(rh.precuneus_2)                |
| 0.00275 | 1.00E-05 | 0.91045 | 0.81731 | (Right-Thalamus-Proper)(rh.inferiorparietal_9)(rh.lingual_7)(rh.precuneus_2)                 |
| 0.00275 | 1.00E-05 | 0.91045 | 0.81731 | (rh.bankssts_2)(rh.fusiform_7)(rh.insula_5)(rh.precuneus_2)                                  |
| 0.00275 | 1.00E-05 | 0.91045 | 0.81731 | (Right-Caudate)(rh.fusiform_7)(rh.isthmuscingulate_2)(rh.precuneus_2)                        |
| 0.00275 | 1.00E-05 | 0.91045 | 0.81731 | (Right-Caudate)(Right-Thalamus-Proper)(rh.fusiform_7)(rh.precuneus_2)                        |
| 0.00278 | 1.00E-05 | 0.85821 | 0.75    | (rh.fusiform_7)(rh.lingual_7)(rh.precuneus_4)(rh.superiortemporal_3)                         |
| 0.00278 | 1.00E-05 | 0.85821 | 0.75    | (rh.bankssts_2)(rh.fusiform_7)(rh.precuneus_4)(rh.superiortemporal_3)                        |
| 0.0028  | 1.00E-05 | 0.90672 | 0.8125  | (rh.fusiform_7)(rh.precuneus_2)(rh.supramarginal_9)                                          |
| 0.0028  | 1.00E-05 | 0.90672 | 0.8125  | (rh.fusiform_7)(rh.insula_2)(rh.precuneus_2)(rh.supramarginal_9)                             |
| 0.0028  | 1.00E-05 | 0.90672 | 0.8125  | (rh.fusiform_7)(rh.insula_2)(rh.lingual_7)(rh.parahippocampal_3)                             |

|         |          |         |         |                                                                                     |
|---------|----------|---------|---------|-------------------------------------------------------------------------------------|
| 0.0028  | 1.00E-05 | 0.90672 | 0.8125  | (Right-Pallidum)(rh.fusiform_7)(rh.lingual_7)(rh.parahippocampal_3)                 |
| 0.0028  | 1.00E-05 | 0.90672 | 0.8125  | (Right-Putamen)(rh.fusiform_7)(rh.lingual_7)(rh.parahippocampal_3)                  |
| 0.0028  | 1.00E-05 | 0.90672 | 0.8125  | (rh.bankssts_2)(rh.fusiform_7)(rh.insula_2)(rh.parahippocampal_3)                   |
| 0.0028  | 1.00E-05 | 0.90672 | 0.8125  | (Right-Thalamus-Proper)(rh.fusiform_7)(rh.lingual_7)(rh.parahippocampal_3)          |
| 0.0028  | 1.00E-05 | 0.90672 | 0.8125  | (rh.fusiform_7)(rh.insula_5)(rh.precuneus_2)(rh.superiortemporal_3)                 |
| 0.0028  | 1.00E-05 | 0.90672 | 0.8125  | (rh.fusiform_7)(rh.isthmuscingulate_2)(rh.lingual_7)(rh.parahippocampal_3)          |
| 0.0028  | 1.00E-05 | 0.90672 | 0.8125  | (rh.bankssts_2)(rh.fusiform_7)(rh.parahippocampal_3)                                |
| 0.0028  | 1.00E-05 | 0.90672 | 0.8125  | (Right-Putamen)(rh.fusiform_7)(rh.precuneus_2)(rh.supramarginal_9)                  |
| 0.0028  | 1.00E-05 | 0.90672 | 0.8125  | (Right-Thalamus-Proper)(rh.bankssts_2)(rh.fusiform_7)(rh.parahippocampal_3)         |
| 0.0028  | 1.00E-05 | 0.90672 | 0.8125  | (Right-Putamen)(rh.bankssts_2)(rh.fusiform_7)(rh.parahippocampal_3)                 |
| 0.0028  | 1.00E-05 | 0.90672 | 0.8125  | (Right-Thalamus-Proper)(rh.fusiform_7)(rh.precuneus_2)(rh.supramarginal_9)          |
| 0.0028  | 1.00E-05 | 0.90672 | 0.8125  | (Right-Pallidum)(rh.bankssts_2)(rh.fusiform_7)(rh.parahippocampal_3)                |
| 0.0028  | 1.00E-05 | 0.90672 | 0.8125  | (Right-Putamen)(rh.inferiorparietal_9)(rh.insula_2)(rh.superiortemporal_3)          |
| 0.0028  | 1.00E-05 | 0.90672 | 0.8125  | (rh.bankssts_2)(rh.fusiform_7)(rh.isthmuscingulate_2)(rh.parahippocampal_3)         |
| 0.0028  | 1.00E-05 | 0.90672 | 0.8125  | (rh.fusiform_7)(rh.isthmuscingulate_2)(rh.precuneus_2)(rh.supramarginal_9)          |
| 0.0028  | 1.00E-05 | 0.90672 | 0.8125  | (Right-Pallidum)(rh.fusiform_7)(rh.parahippocampal_2)(rh.precuneus_2)               |
| 0.0028  | 1.00E-05 | 0.90672 | 0.8125  | (rh.inferiorparietal_9)(rh.insula_2)(rh.isthmuscingulate_2)(rh.superiortemporal_3)  |
| 0.0028  | 1.00E-05 | 0.90672 | 0.8125  | (rh.fusiform_7)(rh.lingual_7)(rh.parahippocampal_3)                                 |
| 0.0028  | 1.00E-05 | 0.90672 | 0.8125  | (rh.inferiorparietal_9)(rh.insula_2)(rh.superiortemporal_3)                         |
| 0.0028  | 1.00E-05 | 0.90672 | 0.8125  | (Right-Thalamus-Proper)(rh.inferiorparietal_9)(rh.insula_2)(rh.superiortemporal_3)  |
| 0.00281 | 1.00E-05 | 0.80224 | 0.68269 | (rh.inferiorparietal_9)(rh.lingual_7)(rh.parahippocampal_3)(rh.precuneus_4)         |
| 0.00281 | 1.00E-05 | 0.80224 | 0.68269 | (rh.bankssts_2)(rh.inferiorparietal_9)(rh.parahippocampal_3)(rh.precuneus_4)        |
| 0.00281 | 1.00E-05 | 0.80224 | 0.68269 | (rh.fusiform_7)(rh.isthmuscingulate_1)(rh.parahippocampal_2)(rh.precuneus_4)        |
| 0.00282 | 1.00E-05 | 0.86194 | 0.75481 | (rh.bankssts_2)(rh.fusiform_7)(rh.lingual_7)(rh.precuneus_4)                        |
| 0.00285 | 1.00E-05 | 0.90299 | 0.80769 | (rh.fusiform_7)(rh.isthmuscingulate_2)(rh.parahippocampal_3)(rh.superiortemporal_3) |
| 0.00285 | 1.00E-05 | 0.90299 | 0.80769 | (Right-Pallidum)(rh.fusiform_7)(rh.parahippocampal_3)(rh.superiortemporal_3)        |
| 0.00285 | 1.00E-05 | 0.90299 | 0.80769 | (rh.fusiform_7)(rh.parahippocampal_3)(rh.superiortemporal_3)                        |
| 0.00285 | 1.00E-05 | 0.90299 | 0.80769 | (rh.inferiorparietal_9)(rh.insula_2)(rh.lingual_7)(rh.parahippocampal_2)            |
| 0.00285 | 1.00E-05 | 0.90299 | 0.80769 | (Right-Thalamus-Proper)(rh.fusiform_7)(rh.parahippocampal_3)(rh.superiortemporal_3) |
| 0.00285 | 1.00E-05 | 0.90299 | 0.80769 | (rh.fusiform_7)(rh.insula_2)(rh.parahippocampal_3)(rh.superiortemporal_3)           |
| 0.00285 | 1.00E-05 | 0.90299 | 0.80769 | (Right-Putamen)(rh.fusiform_7)(rh.parahippocampal_3)(rh.superiortemporal_3)         |
| 0.00285 | 1.00E-05 | 0.90299 | 0.80769 | (rh.bankssts_2)(rh.inferiorparietal_9)(rh.insula_2)(rh.parahippocampal_2)           |
| 0.00288 | 1.00E-05 | 0.89925 | 0.80288 | (Right-Caudate)(rh.fusiform_7)(rh.precuneus_2)(rh.supramarginal_9)                  |
| 0.00288 | 1.00E-05 | 0.89925 | 0.80288 | (Right-Caudate)(rh.inferiorparietal_9)(rh.lingual_7)(rh.superiortemporal_3)         |
| 0.00288 | 1.00E-05 | 0.8694  | 0.76442 | (rh.fusiform_7)(rh.precuneus_2)(rh.superiortemporal_3)(rh.superiortemporal_6)       |

|         |          |         |         |                                                                                              |
|---------|----------|---------|---------|----------------------------------------------------------------------------------------------|
| 0.00288 | 1.00E-05 | 0.8694  | 0.76442 | (rh.entorhinal_1)(rh.fusiform_7)(rh.fusiform_8)(rh.precuneus_2)                              |
| 0.0029  | 1.00E-05 | 0.87313 | 0.76923 | (rh.inferiorparietal_9)(rh.insula_5)(rh.precuneus_2)                                         |
| 0.0029  | 1.00E-05 | 0.87313 | 0.76923 | (rh.inferiorparietal_9)(rh.insula_2)(rh.insula_5)(rh.precuneus_2)                            |
| 0.0029  | 1.00E-05 | 0.87313 | 0.76923 | (rh.inferiorparietal_9)(rh.insula_5)(rh.isthmuscingulate_2)(rh.precuneus_2)                  |
| 0.0029  | 1.00E-05 | 0.87313 | 0.76923 | (Right-Thalamus-Proper)(rh.inferiorparietal_9)(rh.insula_5)(rh.precuneus_2)                  |
| 0.0029  | 1.00E-05 | 0.87313 | 0.76923 | (Right-Pallidum)(rh.inferiorparietal_9)(rh.insula_5)(rh.precuneus_2)                         |
| 0.0029  | 1.00E-05 | 0.87313 | 0.76923 | (Right-Putamen)(rh.inferiorparietal_9)(rh.insula_5)(rh.precuneus_2)                          |
| 0.00291 | 1.00E-05 | 0.89552 | 0.79808 | (rh.inferiorparietal_9)(rh.isthmuscingulate_2)(rh.superiortemporal_3)(rh.supramarginal_9)    |
| 0.00291 | 1.00E-05 | 0.89552 | 0.79808 | (rh.inferiorparietal_10)(rh.inferiorparietal_9)(rh.lingual_7)(rh.superiortemporal_3)         |
| 0.00291 | 1.00E-05 | 0.89552 | 0.79808 | (Right-Thalamus-Proper)(rh.inferiorparietal_9)(rh.superiortemporal_3)(rh.supramarginal_9)    |
| 0.00291 | 1.00E-05 | 0.89552 | 0.79808 | (rh.fusiform_7)(rh.parahippocampal_2)(rh.precuneus_2)(rh.supramarginal_9)                    |
| 0.00291 | 1.00E-05 | 0.89552 | 0.79808 | (Right-Putamen)(rh.inferiorparietal_9)(rh.superiortemporal_3)(rh.supramarginal_9)            |
| 0.00291 | 1.00E-05 | 0.89552 | 0.79808 | (rh.bankssts_2)(rh.inferiorparietal_10)(rh.inferiorparietal_9)(rh.superiortemporal_3)        |
| 0.00292 | 1.00E-05 | 0.89179 | 0.79327 | (rh.bankssts_2)(rh.fusiform_7)(rh.fusiform_8)(rh.precuneus_2)                                |
| 0.00292 | 1.00E-05 | 0.89179 | 0.79327 | (rh.inferiorparietal_9)(rh.insula_2)(rh.precuneus_2)(rh.supramarginal_9)                     |
| 0.00292 | 1.00E-05 | 0.89179 | 0.79327 | (rh.inferiorparietal_9)(rh.insula_2)(rh.superiortemporal_3)(rh.supramarginal_9)              |
| 0.00292 | 1.00E-05 | 0.89179 | 0.79327 | (rh.inferiorparietal_10)(rh.inferiorparietal_9)(rh.insula_2)(rh.precuneus_2)                 |
| 0.00292 | 1.00E-05 | 0.89179 | 0.79327 | (rh.fusiform_7)(rh.fusiform_8)(rh.lingual_7)(rh.precuneus_2)                                 |
| 0.00293 | 1.00E-05 | 0.8806  | 0.77885 | (rh.entorhinal_1)(rh.fusiform_7)(rh.insula_2)(rh.precuneus_2)                                |
| 0.00293 | 1.00E-05 | 0.8806  | 0.77885 | (rh.entorhinal_1)(rh.fusiform_7)(rh.precuneus_2)                                             |
| 0.00293 | 1.00E-05 | 0.8806  | 0.77885 | (rh.entorhinal_1)(rh.fusiform_7)(rh.isthmuscingulate_2)(rh.precuneus_2)                      |
| 0.00293 | 1.00E-05 | 0.8806  | 0.77885 | (rh.entorhinal_1)(rh.fusiform_7)(rh.precuneus_2)(rh.superiortemporal_9)                      |
| 0.00293 | 1.00E-05 | 0.8806  | 0.77885 | (Right-Thalamus-Proper)(rh.entorhinal_1)(rh.fusiform_7)(rh.precuneus_2)                      |
| 0.00293 | 1.00E-05 | 0.8806  | 0.77885 | (Right-Pallidum)(rh.entorhinal_1)(rh.fusiform_7)(rh.precuneus_2)                             |
| 0.00293 | 1.00E-05 | 0.8806  | 0.77885 | (Right-Putamen)(rh.entorhinal_1)(rh.fusiform_7)(rh.precuneus_2)                              |
| 0.00293 | 1.00E-05 | 0.88806 | 0.78846 | (rh.fusiform_7)(rh.fusiform_8)(rh.precuneus_2)(rh.superiortemporal_3)                        |
| 0.00293 | 1.00E-05 | 0.88806 | 0.78846 | (Right-Caudate)(rh.inferiorparietal_9)(rh.superiortemporal_3)(rh.supramarginal_9)            |
| 0.00293 | 1.00E-05 | 0.88806 | 0.78846 | (rh.inferiorparietal_10)(rh.inferiorparietal_9)(rh.parahippocampal_2)(rh.superiortemporal_3) |
| 0.00293 | 1.00E-05 | 0.88806 | 0.78846 | (rh.fusiform_7)(rh.fusiform_8)(rh.lingual_7)(rh.parahippocampal_3)                           |
| 0.00293 | 1.00E-05 | 0.88806 | 0.78846 | (rh.bankssts_2)(rh.fusiform_7)(rh.fusiform_8)(rh.parahippocampal_3)                          |
| 0.00293 | 1.00E-05 | 0.88806 | 0.78846 | (rh.fusiform_7)(rh.insula_4)(rh.parahippocampal_3)(rh.precuneus_2)                           |
| 0.00293 | 1.00E-05 | 0.88806 | 0.78846 | (rh.inferiorparietal_9)(rh.parahippocampal_2)(rh.precuneus_2)(rh.supramarginal_9)            |
| 0.00294 | 1.00E-05 | 0.88433 | 0.78365 | (rh.fusiform_7)(rh.fusiform_8)(rh.parahippocampal_3)(rh.superiortemporal_3)                  |
| 0.00294 | 1.00E-05 | 0.88433 | 0.78365 | (rh.inferiorparietal_10)(rh.inferiorparietal_9)(rh.superiortemporal_3)(rh.supramarginal_9)   |
| 0.00294 | 1.00E-05 | 0.88433 | 0.78365 | (rh.inferiorparietal_4)(rh.inferiorparietal_9)(rh.precuneus_2)(rh.superiortemporal_3)        |

|         |          |         |         |                                                                                        |
|---------|----------|---------|---------|----------------------------------------------------------------------------------------|
| 0.00294 | 1.00E-05 | 0.88433 | 0.78365 | (rh.fusiform_7)(rh.inferiorparietal_10)(rh.parahippocampal_3)(rh.precuneus_2)          |
| 0.00296 | 1.00E-05 | 0.98507 | 0.93269 | (rh.bankssts_2)(rh.insula_2)(rh.precuneus_2)(rh.superiortemporal_3)                    |
| 0.00296 | 1.00E-05 | 0.98507 | 0.93269 | (rh.insula_2)(rh.lingual_7)(rh.precuneus_2)(rh.superiortemporal_3)                     |
| 0.003   | 1.00E-05 | 0.8097  | 0.69231 | (Right-Pallidum)(rh.fusiform_7)(rh.isthmuscingulate_1)(rh.precuneus_4)                 |
| 0.00309 | 1.00E-05 | 0.81343 | 0.69712 | (rh.fusiform_7)(rh.inferiorparietal_9)(rh.precuneus_3)(rh.supramarginal_9)             |
| 0.00309 | 1.00E-05 | 0.81343 | 0.69712 | (Right-Caudate)(rh.fusiform_7)(rh.fusiform_8)(rh.inferiorparietal_9)                   |
| 0.00319 | 1.00E-05 | 0.81716 | 0.70192 | (rh.entorhinal_1)(rh.inferiorparietal_9)(rh.precuneus_2)(rh.supramarginal_9)           |
| 0.00319 | 1.00E-05 | 0.81716 | 0.70192 | (Right-Accumbens-area)(rh.fusiform_7)(rh.fusiform_8)(rh.superiortemporal_6)            |
| 0.00328 | 1.00E-05 | 0.8209  | 0.70673 | (rh.fusiform_7)(rh.inferiorparietal_9)(rh.parahippocampal_2)(rh.precuneus_3)           |
| 0.00328 | 1.00E-05 | 0.8209  | 0.70673 | (rh.fusiform_7)(rh.inferiorparietal_4)(rh.inferiorparietal_9)(rh.supramarginal_9)      |
| 0.00328 | 1.00E-05 | 0.8209  | 0.70673 | (rh.fusiform_7)(rh.inferiorparietal_9)(rh.insula_4)(rh.supramarginal_9)                |
| 0.00328 | 1.00E-05 | 0.8209  | 0.70673 | (rh.entorhinal_1)(rh.inferiorparietal_9)(rh.insula_4)(rh.precuneus_2)                  |
| 0.00328 | 1.00E-05 | 0.8209  | 0.70673 | (rh.fusiform_7)(rh.fusiform_8)(rh.inferiorparietal_9)(rh.insula_5)                     |
| 0.00338 | 1.00E-05 | 0.97388 | 0.91346 | (rh.insula_2)(rh.parahippocampal_2)(rh.precuneus_2)(rh.superiortemporal_3)             |
| 0.00346 | 1.00E-05 | 0.82836 | 0.71635 | (rh.fusiform_7)(rh.inferiorparietal_9)(rh.isthmuscingulate_2)(rh.precuneus_3)          |
| 0.00346 | 1.00E-05 | 0.82836 | 0.71635 | (rh.fusiform_7)(rh.inferiorparietal_9)(rh.insula_2)(rh.precuneus_3)                    |
| 0.00346 | 1.00E-05 | 0.82836 | 0.71635 | (rh.entorhinal_1)(rh.inferiorparietal_9)(rh.insula_5)(rh.precuneus_2)                  |
| 0.00346 | 1.00E-05 | 0.82836 | 0.71635 | (Right-Thalamus-Proper)(rh.fusiform_7)(rh.inferiorparietal_9)(rh.precuneus_3)          |
| 0.00346 | 1.00E-05 | 0.82836 | 0.71635 | (Right-Putamen)(rh.fusiform_7)(rh.inferiorparietal_9)(rh.precuneus_3)                  |
| 0.00346 | 1.00E-05 | 0.82836 | 0.71635 | (rh.fusiform_7)(rh.inferiorparietal_4)(rh.inferiorparietal_9)(rh.parahippocampal_2)    |
| 0.00346 | 1.00E-05 | 0.82836 | 0.71635 | (rh.fusiform_7)(rh.inferiorparietal_9)(rh.insula_4)(rh.parahippocampal_2)              |
| 0.00346 | 1.00E-05 | 0.82836 | 0.71635 | (rh.fusiform_7)(rh.inferiorparietal_9)(rh.precuneus_3)                                 |
| 0.00355 | 1.00E-05 | 0.83209 | 0.72115 | (rh.inferiorparietal_10)(rh.inferiorparietal_9)(rh.precuneus_4)(rh.superiortemporal_3) |
| 0.00364 | 1.00E-05 | 0.83582 | 0.72596 | (Right-Pallidum)(rh.fusiform_7)(rh.inferiorparietal_9)(rh.insula_4)                    |
| 0.00364 | 1.00E-05 | 0.83582 | 0.72596 | (Right-Thalamus-Proper)(rh.fusiform_7)(rh.inferiorparietal_4)(rh.inferiorparietal_9)   |
| 0.00364 | 1.00E-05 | 0.83582 | 0.72596 | (rh.fusiform_7)(rh.inferiorparietal_4)(rh.inferiorparietal_9)(rh.insula_2)             |
| 0.00364 | 1.00E-05 | 0.83582 | 0.72596 | (Right-Putamen)(rh.fusiform_7)(rh.inferiorparietal_9)(rh.insula_4)                     |
| 0.00364 | 1.00E-05 | 0.83582 | 0.72596 | (rh.fusiform_7)(rh.insula_5)(rh.parahippocampal_3)(rh.precuneus_4)                     |
| 0.00364 | 1.00E-05 | 0.83582 | 0.72596 | (rh.fusiform_7)(rh.inferiorparietal_4)(rh.inferiorparietal_9)(rh.isthmuscingulate_2)   |
| 0.00364 | 1.00E-05 | 0.83582 | 0.72596 | (Right-Putamen)(rh.fusiform_7)(rh.inferiorparietal_4)(rh.inferiorparietal_9)           |
| 0.00364 | 1.00E-05 | 0.83582 | 0.72596 | (Right-Pallidum)(rh.fusiform_7)(rh.inferiorparietal_10)(rh.inferiorparietal_9)         |
| 0.00364 | 1.00E-05 | 0.83582 | 0.72596 | (rh.fusiform_7)(rh.inferiorparietal_9)(rh.insula_2)(rh.insula_4)                       |
| 0.00364 | 1.00E-05 | 0.83582 | 0.72596 | (Right-Caudate)(rh.inferiorparietal_9)(rh.precuneus_4)(rh.superiortemporal_3)          |
| 0.00364 | 1.00E-05 | 0.83582 | 0.72596 | (rh.fusiform_7)(rh.inferiorparietal_9)(rh.insula_4)(rh.isthmuscingulate_2)             |
| 0.00364 | 1.00E-05 | 0.83582 | 0.72596 | (Right-Thalamus-Proper)(rh.fusiform_7)(rh.inferiorparietal_9)(rh.insula_4)             |



|         |          |         |         |                                                                                       |
|---------|----------|---------|---------|---------------------------------------------------------------------------------------|
| 0.00364 | 1.00E-05 | 0.83582 | 0.72596 | (rh.fusiform_7)(rh.inferiorparietal_9)(rh.insula_4)                                   |
| 0.00373 | 1.00E-05 | 0.83955 | 0.73077 | (Right-Caudate)(rh.fusiform_7)(rh.isthmuscingulate_1)(rh.precuneus_2)                 |
| 0.00373 | 1.00E-05 | 0.83955 | 0.73077 | (rh.fusiform_7)(rh.parahippocampal_2)(rh.precuneus_4)(rh.supramarginal_9)             |
| 0.00373 | 1.00E-05 | 0.83955 | 0.73077 | (rh.inferiorparietal_9)(rh.insula_2)(rh.precuneus_4)(rh.superiortemporal_3)           |
| 0.0038  | 1.00E-05 | 0.89179 | 0.7963  | (Right-Caudate)(rh.inferiorparietal_10)(rh.inferiorparietal_9)                        |
| 0.0038  | 1.00E-05 | 0.89179 | 0.7963  | (Right-Caudate)(Right-Pallidum)(rh.inferiorparietal_9)(rh.lingual_7)                  |
| 0.0038  | 1.00E-05 | 0.89179 | 0.7963  | (Right-Caudate)(rh.inferiorparietal_9)(rh.supramarginal_9)                            |
| 0.0038  | 1.00E-05 | 0.89179 | 0.7963  | (rh.inferiorparietal_4)(rh.inferiorparietal_9)(rh.insula_2)(rh.lingual_7)             |
| 0.00381 | 1.00E-05 | 0.84328 | 0.73558 | (Right-Putamen)(rh.inferiorparietal_9)(rh.precuneus_4)(rh.superiortemporal_3)         |
| 0.00381 | 1.00E-05 | 0.84328 | 0.73558 | (rh.inferiorparietal_9)(rh.precuneus_4)(rh.superiortemporal_3)                        |
| 0.00381 | 1.00E-05 | 0.84328 | 0.73558 | (rh.inferiorparietal_9)(rh.insula_4)(rh.parahippocampal_3)(rh.precuneus_2)            |
| 0.00381 | 1.00E-05 | 0.84328 | 0.73558 | (rh.inferiorparietal_9)(rh.isthmuscingulate_2)(rh.precuneus_4)(rh.superiortemporal_3) |
| 0.00381 | 1.00E-05 | 0.84328 | 0.73558 | (rh.bankssts_2)(rh.inferiorparietal_9)(rh.precuneus_2)(rh.precuneus_4)                |
| 0.00381 | 1.00E-05 | 0.84328 | 0.73558 | (rh.inferiorparietal_9)(rh.lingual_7)(rh.precuneus_2)(rh.precuneus_4)                 |
| 0.00381 | 1.00E-05 | 0.84328 | 0.73558 | (rh.inferiorparietal_9)(rh.parahippocampal_3)(rh.precuneus_2)(rh.supramarginal_9)     |
| 0.00381 | 1.00E-05 | 0.84328 | 0.73558 | (Right-Thalamus-Proper)(rh.inferiorparietal_9)(rh.precuneus_4)(rh.superiortemporal_3) |
| 0.00381 | 1.00E-05 | 0.84328 | 0.73558 | (rh.inferiorparietal_4)(rh.inferiorparietal_9)(rh.parahippocampal_3)(rh.precuneus_2)  |
| 0.00381 | 1.00E-05 | 0.84328 | 0.73558 | (rh.inferiorparietal_10)(rh.inferiorparietal_9)(rh.parahippocampal_3)(rh.precuneus_2) |
| 0.00381 | 1.00E-05 | 0.84328 | 0.73558 | (Right-Caudate)(rh.fusiform_7)(rh.precuneus_4)(rh.supramarginal_9)                    |
| 0.00384 | 1.00E-05 | 0.92537 | 0.84135 | (Right-Thalamus-Proper)(rh.bankssts_2)(rh.fusiform_7)(rh.lingual_7)                   |
| 0.00384 | 1.00E-05 | 0.92537 | 0.84135 | (rh.bankssts_2)(rh.fusiform_7)(rh.insula_2)(rh.lingual_7)                             |
| 0.00384 | 1.00E-05 | 0.92537 | 0.84135 | (rh.bankssts_2)(rh.fusiform_7)(rh.lingual_7)                                          |
| 0.00384 | 1.00E-05 | 0.92537 | 0.84135 | (rh.bankssts_2)(rh.fusiform_7)(rh.isthmuscingulate_2)(rh.lingual_7)                   |
| 0.00384 | 1.00E-05 | 0.92537 | 0.84135 | (Right-Putamen)(rh.bankssts_2)(rh.fusiform_7)(rh.lingual_7)                           |
| 0.00389 | 1.00E-05 | 0.84701 | 0.74038 | (rh.fusiform_7)(rh.isthmuscingulate_1)(rh.isthmuscingulate_2)(rh.precuneus_2)         |
| 0.00389 | 1.00E-05 | 0.84701 | 0.74038 | (rh.fusiform_7)(rh.parahippocampal_3)(rh.superiortemporal_10)(rh.superiortemporal_3)  |
| 0.00389 | 1.00E-05 | 0.84701 | 0.74038 | (Right-Accumbens-area)(rh.fusiform_7)(rh.insula_5)(rh.precuneus_2)                    |
| 0.00389 | 1.00E-05 | 0.84701 | 0.74038 | (Right-Accumbens-area)(rh.fusiform_7)(rh.precuneus_2)(rh.superiortemporal_9)          |
| 0.00389 | 1.00E-05 | 0.84701 | 0.74038 | (rh.fusiform_7)(rh.fusiform_8)(rh.precuneus_2)(rh.superiortemporal_10)                |
| 0.00389 | 1.00E-05 | 0.84701 | 0.74038 | (rh.fusiform_7)(rh.precuneus_2)(rh.precuneus_4)(rh.superiortemporal_9)                |
| 0.00389 | 1.00E-05 | 0.84701 | 0.74038 | (Right-Caudate)(rh.fusiform_7)(rh.parahippocampal_2)(rh.precuneus_4)                  |
| 0.00389 | 1.00E-05 | 0.84701 | 0.74038 | (Right-Putamen)(rh.fusiform_7)(rh.isthmuscingulate_1)(rh.precuneus_2)                 |
| 0.00389 | 1.00E-05 | 0.84701 | 0.74038 | (rh.bankssts_1)(rh.inferiorparietal_9)(rh.parahippocampal_2)(rh.superiortemporal_3)   |
| 0.00389 | 1.00E-05 | 0.84701 | 0.74038 | (rh.fusiform_7)(rh.parahippocampal_2)(rh.precuneus_4)(rh.superiortemporal_3)          |
| 0.00389 | 1.00E-05 | 0.84701 | 0.74038 | (Right-Thalamus-Proper)(rh.fusiform_7)(rh.isthmuscingulate_1)(rh.precuneus_2)         |

|         |          |         |         |                                                                                       |
|---------|----------|---------|---------|---------------------------------------------------------------------------------------|
| 0.00389 | 1.00E-05 | 0.84701 | 0.74038 | (rh.fusiform_7)(rh.insula_2)(rh.isthmuscingulate_1)(rh.precuneus_2)                   |
| 0.00394 | 1.00E-05 | 0.83955 | 0.73148 | (rh.inferiorparietal_9)(rh.isthmuscingulate_1)                                        |
| 0.00396 | 1.00E-05 | 0.85075 | 0.74519 | (rh.fusiform_7)(rh.insula_2)(rh.precuneus_4)(rh.supramarginal_9)                      |
| 0.00396 | 1.00E-05 | 0.85075 | 0.74519 | (Right-Thalamus-Proper)(rh.fusiform_7)(rh.precuneus_4)(rh.supramarginal_9)            |
| 0.00396 | 1.00E-05 | 0.85075 | 0.74519 | (rh.fusiform_7)(rh.isthmuscingulate_2)(rh.precuneus_4)(rh.supramarginal_9)            |
| 0.00396 | 1.00E-05 | 0.85075 | 0.74519 | (Right-Caudate)(rh.fusiform_7)(rh.precuneus_4)(rh.superiortemporal_3)                 |
| 0.00396 | 1.00E-05 | 0.85075 | 0.74519 | (rh.fusiform_7)(rh.fusiform_8)(rh.parahippocampal_3)(rh.superiortemporal_6)           |
| 0.00396 | 1.00E-05 | 0.85075 | 0.74519 | (rh.bankssts_2)(rh.fusiform_7)(rh.parahippocampal_3)(rh.superiortemporal_10)          |
| 0.00396 | 1.00E-05 | 0.85075 | 0.74519 | (rh.bankssts_2)(rh.fusiform_7)(rh.parahippocampal_2)(rh.precuneus_4)                  |
| 0.00396 | 1.00E-05 | 0.85075 | 0.74519 | (Right-Putamen)(rh.fusiform_7)(rh.precuneus_4)(rh.supramarginal_9)                    |
| 0.00397 | 1.00E-05 | 0.92164 | 0.83654 | (rh.bankssts_2)(rh.fusiform_7)(rh.insula_2)(rh.superiortemporal_3)                    |
| 0.00397 | 1.00E-05 | 0.92164 | 0.83654 | (rh.fusiform_7)(rh.isthmuscingulate_2)(rh.lingual_7)(rh.superiortemporal_3)           |
| 0.00397 | 1.00E-05 | 0.92164 | 0.83654 | (rh.bankssts_2)(rh.fusiform_7)(rh.superiortemporal_3)                                 |
| 0.00397 | 1.00E-05 | 0.92164 | 0.83654 | (Right-Thalamus-Proper)(rh.fusiform_7)(rh.lingual_7)(rh.superiortemporal_3)           |
| 0.00397 | 1.00E-05 | 0.92164 | 0.83654 | (rh.bankssts_2)(rh.fusiform_7)(rh.isthmuscingulate_2)(rh.superiortemporal_3)          |
| 0.00397 | 1.00E-05 | 0.92164 | 0.83654 | (rh.fusiform_7)(rh.lingual_7)(rh.superiortemporal_3)                                  |
| 0.00397 | 1.00E-05 | 0.92164 | 0.83654 | (Right-Thalamus-Proper)(rh.bankssts_2)(rh.fusiform_7)(rh.superiortemporal_3)          |
| 0.00397 | 1.00E-05 | 0.92164 | 0.83654 | (rh.fusiform_7)(rh.insula_2)(rh.lingual_7)(rh.superiortemporal_3)                     |
| 0.00397 | 1.00E-05 | 0.92164 | 0.83654 | (Right-Putamen)(rh.fusiform_7)(rh.lingual_7)(rh.superiortemporal_3)                   |
| 0.00397 | 1.00E-05 | 0.92164 | 0.83654 | (Right-Putamen)(rh.bankssts_2)(rh.fusiform_7)(rh.superiortemporal_3)                  |
| 0.00397 | 1.00E-05 | 0.98881 | 0.94231 | (rh.isthmuscingulate_2)(rh.precuneus_2)(rh.superiortemporal_3)                        |
| 0.00397 | 1.00E-05 | 0.98881 | 0.94231 | (Right-Thalamus-Proper)(rh.precuneus_2)(rh.superiortemporal_3)                        |
| 0.00397 | 1.00E-05 | 0.98881 | 0.94231 | (Right-Thalamus-Proper)(rh.isthmuscingulate_2)(rh.precuneus_2)(rh.superiortemporal_3) |
| 0.00397 | 1.00E-05 | 0.98881 | 0.94231 | (Right-Putamen)(Right-Thalamus-Proper)(rh.precuneus_2)(rh.superiortemporal_3)         |
| 0.00397 | 1.00E-05 | 0.98881 | 0.94231 | (Right-Putamen)(rh.precuneus_2)(rh.superiortemporal_3)                                |
| 0.00397 | 1.00E-05 | 0.98881 | 0.94231 | (rh.precuneus_2)(rh.superiortemporal_3)                                               |
| 0.00397 | 1.00E-05 | 0.98881 | 0.94231 | (Right-Putamen)(rh.isthmuscingulate_2)(rh.precuneus_2)(rh.superiortemporal_3)         |
| 0.004   | 1.00E-05 | 0.84701 | 0.74074 | (rh.inferiorparietal_9)(rh.parahippocampal_3)(rh.supramarginal_9)                     |
| 0.004   | 1.00E-05 | 0.84701 | 0.74074 | (rh.inferiorparietal_9)(rh.precuneus_4)                                               |
| 0.00403 | 1.00E-05 | 0.80224 | 0.6875  | (Right-Accumbens-area)(rh.inferiorparietal_9)(rh.lingual_7)(rh.precuneus_2)           |
| 0.00403 | 1.00E-05 | 0.80224 | 0.6875  | (rh.inferiorparietal_9)(rh.insula_2)(rh.parahippocampal_3)(rh.precuneus_4)            |
| 0.00403 | 1.00E-05 | 0.80224 | 0.6875  | (Right-Accumbens-area)(rh.bankssts_2)(rh.inferiorparietal_9)(rh.precuneus_2)          |
| 0.00403 | 1.00E-05 | 0.80224 | 0.6875  | (rh.inferiorparietal_9)(rh.parahippocampal_3)(rh.precuneus_4)                         |
| 0.00403 | 1.00E-05 | 0.80224 | 0.6875  | (Right-Putamen)(rh.inferiorparietal_9)(rh.parahippocampal_3)(rh.precuneus_4)          |
| 0.00403 | 1.00E-05 | 0.80224 | 0.6875  | (rh.inferiorparietal_9)(rh.isthmuscingulate_2)(rh.parahippocampal_3)(rh.precuneus_4)  |

|         |          |         |         |                                                                                       |
|---------|----------|---------|---------|---------------------------------------------------------------------------------------|
| 0.00403 | 1.00E-05 | 0.80224 | 0.6875  | (Right-Accumbens-area)(rh.inferiorparietal_9)(rh.precuneus_2)(rh.superiortemporal_9)  |
| 0.00403 | 1.00E-05 | 0.80224 | 0.6875  | (Right-Thalamus-Proper)(rh.inferiorparietal_9)(rh.parahippocampal_3)(rh.precuneus_4)  |
| 0.00403 | 1.00E-05 | 0.80224 | 0.6875  | (rh.inferiorparietal_9)(rh.parahippocampal_2)(rh.precuneus_2)(rh.superiortemporal_10) |
| 0.00403 | 1.00E-05 | 0.80224 | 0.6875  | (Right-Pallidum)(rh.inferiorparietal_9)(rh.parahippocampal_3)(rh.precuneus_4)         |
| 0.00403 | 1.00E-05 | 0.80224 | 0.6875  | (rh.fusiform_7)(rh.insula_5)(rh.isthmuscingulate_1)(rh.precuneus_4)                   |
| 0.00404 | 1.00E-05 | 0.85448 | 0.75    | (rh.fusiform_7)(rh.precuneus_2)(rh.superiortemporal_10)(rh.superiortemporal_3)        |
| 0.00404 | 1.00E-05 | 0.85448 | 0.75    | (Right-Caudate)(rh.bankssts_2)(rh.fusiform_7)(rh.precuneus_4)                         |
| 0.00405 | 1.00E-05 | 0.86194 | 0.75926 | (rh.inferiorparietal_9)(rh.parahippocampal_3)                                         |
| 0.00411 | 1.00E-05 | 0.85821 | 0.75481 | (rh.fusiform_7)(rh.insula_2)(rh.precuneus_4)(rh.superiortemporal_3)                   |
| 0.00411 | 1.00E-05 | 0.85821 | 0.75481 | (Right-Putamen)(rh.fusiform_7)(rh.precuneus_4)(rh.superiortemporal_3)                 |
| 0.00411 | 1.00E-05 | 0.85821 | 0.75481 | (rh.inferiorparietal_9)(rh.lingual_7)(rh.parahippocampal_3)(rh.superiortemporal_3)    |
| 0.00411 | 1.00E-05 | 0.85821 | 0.75481 | (rh.bankssts_2)(rh.fusiform_7)(rh.precuneus_2)(rh.superiortemporal_10)                |
| 0.00411 | 1.00E-05 | 0.85821 | 0.75481 | (rh.fusiform_7)(rh.precuneus_4)(rh.superiortemporal_3)                                |
| 0.00411 | 1.00E-05 | 0.85821 | 0.75481 | (rh.inferiorparietal_9)(rh.insula_5)(rh.precuneus_2)(rh.supramarginal_9)              |
| 0.00411 | 1.00E-05 | 0.85821 | 0.75481 | (rh.fusiform_7)(rh.lingual_7)(rh.precuneus_2)(rh.superiortemporal_10)                 |
| 0.00411 | 1.00E-05 | 0.85821 | 0.75481 | (rh.inferiorparietal_10)(rh.inferiorparietal_9)(rh.insula_5)(rh.precuneus_2)          |
| 0.00411 | 1.00E-05 | 0.85821 | 0.75481 | (rh.bankssts_2)(rh.inferiorparietal_9)(rh.parahippocampal_3)(rh.superiortemporal_3)   |
| 0.00411 | 1.00E-05 | 0.85821 | 0.75481 | (rh.fusiform_7)(rh.isthmuscingulate_2)(rh.precuneus_4)(rh.superiortemporal_3)         |
| 0.00411 | 1.00E-05 | 0.85821 | 0.75481 | (Right-Thalamus-Proper)(rh.fusiform_7)(rh.precuneus_4)(rh.superiortemporal_3)         |
| 0.00416 | 1.00E-05 | 0.91418 | 0.82692 | (rh.bankssts_2)(rh.fusiform_7)(rh.lingual_7)(rh.parahippocampal_2)                    |
| 0.00417 | 1.00E-05 | 0.86194 | 0.75962 | (rh.inferiorparietal_9)(rh.parahippocampal_2)(rh.precuneus_2)(rh.superiortemporal_9)  |
| 0.00417 | 1.00E-05 | 0.86194 | 0.75962 | (rh.fusiform_7)(rh.lingual_7)(rh.precuneus_4)                                         |
| 0.00417 | 1.00E-05 | 0.86194 | 0.75962 | (Right-Putamen)(rh.bankssts_2)(rh.fusiform_7)(rh.precuneus_4)                         |
| 0.00417 | 1.00E-05 | 0.86194 | 0.75962 | (rh.bankssts_2)(rh.fusiform_7)(rh.insula_2)(rh.precuneus_4)                           |
| 0.00417 | 1.00E-05 | 0.86194 | 0.75962 | (Right-Caudate)(rh.inferiorparietal_9)(rh.insula_5)(rh.precuneus_2)                   |
| 0.00417 | 1.00E-05 | 0.86194 | 0.75962 | (Right-Thalamus-Proper)(rh.bankssts_2)(rh.fusiform_7)(rh.precuneus_4)                 |
| 0.00417 | 1.00E-05 | 0.86194 | 0.75962 | (rh.inferiorparietal_9)(rh.insula_4)(rh.insula_5)(rh.precuneus_2)                     |
| 0.00417 | 1.00E-05 | 0.86194 | 0.75962 | (rh.fusiform_7)(rh.insula_2)(rh.lingual_7)(rh.precuneus_4)                            |
| 0.00417 | 1.00E-05 | 0.86194 | 0.75962 | (Right-Thalamus-Proper)(rh.fusiform_7)(rh.lingual_7)(rh.precuneus_4)                  |
| 0.00417 | 1.00E-05 | 0.86194 | 0.75962 | (rh.fusiform_7)(rh.parahippocampal_3)(rh.superiortemporal_3)(rh.superiortemporal_6)   |
| 0.00417 | 1.00E-05 | 0.86194 | 0.75962 | (rh.fusiform_7)(rh.isthmuscingulate_2)(rh.lingual_7)(rh.precuneus_4)                  |
| 0.00417 | 1.00E-05 | 0.86194 | 0.75962 | (rh.bankssts_2)(rh.fusiform_7)(rh.precuneus_4)                                        |
| 0.00417 | 1.00E-05 | 0.86194 | 0.75962 | (rh.bankssts_2)(rh.fusiform_7)(rh.isthmuscingulate_2)(rh.precuneus_4)                 |
| 0.00417 | 1.00E-05 | 0.86194 | 0.75962 | (Right-Putamen)(rh.fusiform_7)(rh.lingual_7)(rh.precuneus_4)                          |
| 0.00417 | 1.00E-05 | 0.86194 | 0.75962 | (rh.bankssts_2)(rh.inferiorparietal_9)(rh.lingual_7)(rh.parahippocampal_3)            |

|         |          |         |         |                                                                                       |
|---------|----------|---------|---------|---------------------------------------------------------------------------------------|
| 0.00417 | 1.00E-05 | 0.80597 | 0.69231 | (Right-Accumbens-area)(rh.fusiform_7)(rh.parahippocampal_3)(rh.superiortemporal_10)   |
| 0.00417 | 1.00E-05 | 0.80597 | 0.69231 | (rh.fusiform_7)(rh.inferiorparietal_9)(rh.parahippocampal_3)(rh.superiortemporal_1)   |
| 0.00423 | 1.00E-05 | 0.86567 | 0.76442 | (rh.entorhinal_1)(rh.fusiform_7)(rh.precuneus_2)(rh.supramarginal_9)                  |
| 0.00423 | 1.00E-05 | 0.86567 | 0.76442 | (rh.inferiorparietal_9)(rh.insula_5)(rh.parahippocampal_2)(rh.superiortemporal_3)     |
| 0.00424 | 1.00E-05 | 0.91045 | 0.82212 | (rh.fusiform_7)(rh.insula_5)(rh.isthmuscingulate_2)(rh.precuneus_2)                   |
| 0.00424 | 1.00E-05 | 0.91045 | 0.82212 | (rh.fusiform_7)(rh.lingual_7)(rh.parahippocampal_2)(rh.superiortemporal_3)            |
| 0.00424 | 1.00E-05 | 0.91045 | 0.82212 | (rh.fusiform_7)(rh.insula_2)(rh.insula_5)(rh.precuneus_2)                             |
| 0.00424 | 1.00E-05 | 0.91045 | 0.82212 | (rh.bankssts_2)(rh.fusiform_7)(rh.lingual_7)(rh.supramarginal_9)                      |
| 0.00424 | 1.00E-05 | 0.91045 | 0.82212 | (Right-Putamen)(rh.inferiorparietal_9)(rh.precuneus_2)                                |
| 0.00424 | 1.00E-05 | 0.91045 | 0.82212 | (rh.fusiform_7)(rh.insula_5)(rh.precuneus_2)                                          |
| 0.00424 | 1.00E-05 | 0.91045 | 0.82212 | (Right-Thalamus-Proper)(rh.inferiorparietal_9)(rh.isthmuscingulate_2)(rh.precuneus_2) |
| 0.00424 | 1.00E-05 | 0.91045 | 0.82212 | (rh.fusiform_7)(rh.lingual_7)(rh.precuneus_2)(rh.superiortemporal_9)                  |
| 0.00424 | 1.00E-05 | 0.91045 | 0.82212 | (rh.bankssts_2)(rh.fusiform_7)(rh.parahippocampal_2)(rh.superiortemporal_3)           |
| 0.00424 | 1.00E-05 | 0.91045 | 0.82212 | (Right-Pallidum)(rh.fusiform_7)(rh.insula_5)(rh.precuneus_2)                          |
| 0.00424 | 1.00E-05 | 0.91045 | 0.82212 | (Right-Putamen)(rh.fusiform_7)(rh.insula_5)(rh.precuneus_2)                           |
| 0.00424 | 1.00E-05 | 0.91045 | 0.82212 | (Right-Thalamus-Proper)(rh.inferiorparietal_9)(rh.precuneus_2)                        |
| 0.00424 | 1.00E-05 | 0.91045 | 0.82212 | (Right-Putamen)(rh.inferiorparietal_9)(rh.isthmuscingulate_2)(rh.precuneus_2)         |
| 0.00424 | 1.00E-05 | 0.91045 | 0.82212 | (Right-Thalamus-Proper)(rh.fusiform_7)(rh.insula_5)(rh.precuneus_2)                   |
| 0.00424 | 1.00E-05 | 0.91045 | 0.82212 | (rh.bankssts_2)(rh.inferiorparietal_9)(rh.insula_2)(rh.lingual_7)                     |
| 0.00424 | 1.00E-05 | 0.91045 | 0.82212 | (rh.inferiorparietal_9)(rh.precuneus_2)                                               |
| 0.00424 | 1.00E-05 | 0.91045 | 0.82212 | (rh.inferiorparietal_9)(rh.isthmuscingulate_2)(rh.precuneus_2)                        |
| 0.00424 | 1.00E-05 | 0.91045 | 0.82212 | (rh.bankssts_2)(rh.fusiform_7)(rh.precuneus_2)(rh.superiortemporal_9)                 |
| 0.00424 | 1.00E-05 | 0.91045 | 0.82212 | (Right-Putamen)(Right-Thalamus-Proper)(rh.inferiorparietal_9)(rh.precuneus_2)         |
| 0.00428 | 1.00E-05 | 0.8694  | 0.76923 | (rh.bankssts_2)(rh.inferiorparietal_9)(rh.insula_5)(rh.parahippocampal_2)             |
| 0.00428 | 1.00E-05 | 0.8694  | 0.76923 | (rh.inferiorparietal_9)(rh.insula_5)(rh.lingual_7)(rh.parahippocampal_2)              |
| 0.00428 | 1.00E-05 | 0.8694  | 0.76923 | (rh.fusiform_7)(rh.lingual_7)(rh.precuneus_2)(rh.superiortemporal_6)                  |
| 0.00428 | 1.00E-05 | 0.8694  | 0.76923 | (rh.bankssts_2)(rh.fusiform_7)(rh.precuneus_2)(rh.superiortemporal_6)                 |
| 0.00428 | 1.00E-05 | 0.8694  | 0.76923 | (rh.entorhinal_1)(rh.fusiform_7)(rh.parahippocampal_2)(rh.precuneus_2)                |
| 0.0043  | 1.00E-05 | 0.90672 | 0.81731 | (rh.bankssts_2)(rh.inferiorparietal_9)(rh.lingual_7)(rh.parahippocampal_2)            |
| 0.0043  | 1.00E-05 | 0.90672 | 0.81731 | (Right-Putamen)(rh.fusiform_7)(rh.insula_2)(rh.parahippocampal_3)                     |
| 0.0043  | 1.00E-05 | 0.90672 | 0.81731 | (Right-Pallidum)(Right-Thalamus-Proper)(rh.fusiform_7)(rh.parahippocampal_3)          |
| 0.0043  | 1.00E-05 | 0.90672 | 0.81731 | (Right-Pallidum)(rh.fusiform_7)(rh.insula_2)(rh.parahippocampal_3)                    |
| 0.0043  | 1.00E-05 | 0.90672 | 0.81731 | (Right-Pallidum)(Right-Putamen)(rh.fusiform_7)(rh.parahippocampal_3)                  |
| 0.0043  | 1.00E-05 | 0.90672 | 0.81731 | (rh.fusiform_7)(rh.isthmuscingulate_2)(rh.parahippocampal_3)                          |
| 0.0043  | 1.00E-05 | 0.90672 | 0.81731 | (Right-Putamen)(rh.fusiform_7)(rh.parahippocampal_3)                                  |

|         |          |         |         |                                                                                       |
|---------|----------|---------|---------|---------------------------------------------------------------------------------------|
| 0.0043  | 1.00E-05 | 0.90672 | 0.81731 | (Right-Putamen)(Right-Thalamus-Proper)(rh.fusiform_7)(rh.parahippocampal_3)           |
| 0.0043  | 1.00E-05 | 0.90672 | 0.81731 | (rh.fusiform_7)(rh.precuneus_2)(rh.superiortemporal_3)(rh.superiortemporal_9)         |
| 0.0043  | 1.00E-05 | 0.90672 | 0.81731 | (rh.fusiform_7)(rh.lingual_7)(rh.superiortemporal_3)(rh.supramarginal_9)              |
| 0.0043  | 1.00E-05 | 0.90672 | 0.81731 | (rh.fusiform_7)(rh.insula_2)(rh.isthmuscingulate_2)(rh.parahippocampal_3)             |
| 0.0043  | 1.00E-05 | 0.90672 | 0.81731 | (Right-Caudate)(Right-Pallidum)(rh.fusiform_7)(rh.precuneus_2)                        |
| 0.0043  | 1.00E-05 | 0.90672 | 0.81731 | (Right-Thalamus-Proper)(rh.fusiform_7)(rh.parahippocampal_3)                          |
| 0.0043  | 1.00E-05 | 0.90672 | 0.81731 | (Right-Thalamus-Proper)(rh.fusiform_7)(rh.insula_2)(rh.parahippocampal_3)             |
| 0.0043  | 1.00E-05 | 0.90672 | 0.81731 | (Right-Thalamus-Proper)(rh.fusiform_7)(rh.isthmuscingulate_2)(rh.parahippocampal_3)   |
| 0.0043  | 1.00E-05 | 0.90672 | 0.81731 | (Right-Putamen)(rh.fusiform_7)(rh.isthmuscingulate_2)(rh.parahippocampal_3)           |
| 0.0043  | 1.00E-05 | 0.90672 | 0.81731 | (rh.fusiform_7)(rh.parahippocampal_3)                                                 |
| 0.0043  | 1.00E-05 | 0.90672 | 0.81731 | (rh.bankssts_2)(rh.fusiform_7)(rh.superiortemporal_3)(rh.supramarginal_9)             |
| 0.0043  | 1.00E-05 | 0.90672 | 0.81731 | (Right-Pallidum)(rh.fusiform_7)(rh.isthmuscingulate_2)(rh.parahippocampal_3)          |
| 0.0043  | 1.00E-05 | 0.90672 | 0.81731 | (Right-Pallidum)(rh.fusiform_7)(rh.parahippocampal_3)                                 |
| 0.0043  | 1.00E-05 | 0.90672 | 0.81731 | (rh.fusiform_7)(rh.insula_2)(rh.parahippocampal_3)                                    |
| 0.00431 | 1.00E-05 | 0.8097  | 0.69712 | (rh.inferiorparietal_9)(rh.inferiortemporal_2)(rh.precuneus_2)(rh.superiortemporal_3) |
| 0.00431 | 1.00E-05 | 0.8097  | 0.69712 | (rh.inferiorparietal_9)(rh.lingual_7)(rh.precuneus_2)(rh.superiortemporal_10)         |
| 0.00431 | 1.00E-05 | 0.8097  | 0.69712 | (rh.bankssts_2)(rh.inferiorparietal_9)(rh.precuneus_2)(rh.superiortemporal_10)        |
| 0.00432 | 1.00E-05 | 0.87313 | 0.77404 | (rh.entorhinal_1)(rh.fusiform_7)(rh.parahippocampal_3)(rh.superiortemporal_3)         |
| 0.00435 | 1.00E-05 | 0.90299 | 0.8125  | (rh.bankssts_2)(rh.fusiform_7)(rh.inferiorparietal_10)(rh.precuneus_2)                |
| 0.00435 | 1.00E-05 | 0.90299 | 0.8125  | (Right-Pallidum)(rh.fusiform_7)(rh.precuneus_2)(rh.supramarginal_9)                   |
| 0.00435 | 1.00E-05 | 0.90299 | 0.8125  | (Right-Putamen)(rh.inferiorparietal_9)(rh.insula_2)(rh.parahippocampal_2)             |
| 0.00435 | 1.00E-05 | 0.90299 | 0.8125  | (Right-Thalamus-Proper)(rh.inferiorparietal_9)(rh.insula_2)(rh.parahippocampal_2)     |
| 0.00435 | 1.00E-05 | 0.90299 | 0.8125  | (rh.inferiorparietal_9)(rh.insula_2)(rh.isthmuscingulate_2)(rh.parahippocampal_2)     |
| 0.00435 | 1.00E-05 | 0.90299 | 0.8125  | (rh.bankssts_2)(rh.fusiform_7)(rh.inferiorparietal_4)(rh.precuneus_2)                 |
| 0.00435 | 1.00E-05 | 0.90299 | 0.8125  | (rh.fusiform_7)(rh.inferiorparietal_10)(rh.lingual_7)(rh.precuneus_2)                 |
| 0.00435 | 1.00E-05 | 0.90299 | 0.8125  | (rh.fusiform_7)(rh.inferiorparietal_4)(rh.lingual_7)(rh.precuneus_2)                  |
| 0.00436 | 1.00E-05 | 0.87687 | 0.77885 | (rh.inferiorparietal_9)(rh.precuneus_2)(rh.superiortemporal_1)(rh.superiortemporal_3) |
| 0.00436 | 1.00E-05 | 0.87687 | 0.77885 | (rh.bankssts_2)(rh.entorhinal_1)(rh.fusiform_7)(rh.parahippocampal_3)                 |
| 0.00436 | 1.00E-05 | 0.87687 | 0.77885 | (rh.fusiform_7)(rh.parahippocampal_3)(rh.precuneus_2)(rh.precuneus_3)                 |
| 0.00436 | 1.00E-05 | 0.87687 | 0.77885 | (rh.entorhinal_1)(rh.fusiform_7)(rh.lingual_7)(rh.parahippocampal_3)                  |
| 0.00436 | 1.00E-05 | 0.87687 | 0.77885 | (rh.entorhinal_1)(rh.fusiform_7)(rh.insula_5)(rh.precuneus_2)                         |
| 0.00438 | 1.00E-05 | 0.89925 | 0.80769 | (rh.fusiform_7)(rh.inferiorparietal_10)(rh.precuneus_2)(rh.superiortemporal_3)        |
| 0.00438 | 1.00E-05 | 0.89925 | 0.80769 | (rh.fusiform_7)(rh.insula_5)(rh.lingual_7)(rh.parahippocampal_3)                      |
| 0.00438 | 1.00E-05 | 0.89925 | 0.80769 | (rh.fusiform_7)(rh.inferiorparietal_4)(rh.precuneus_2)(rh.superiortemporal_3)         |
| 0.00438 | 1.00E-05 | 0.89925 | 0.80769 | (Right-Caudate)(Right-Putamen)(rh.inferiorparietal_9)(rh.superiortemporal_3)          |

|         |          |         |         |                                                                                               |
|---------|----------|---------|---------|-----------------------------------------------------------------------------------------------|
| 0.00438 | 1.00E-05 | 0.89925 | 0.80769 | (Right-Caudate)(Right-Thalamus-Proper)(rh.inferiorparietal_9)(rh.superiortemporal_3)          |
| 0.00438 | 1.00E-05 | 0.89925 | 0.80769 | (Right-Pallidum)(rh.inferiorparietal_9)(rh.insula_2)(rh.precuneus_2)                          |
| 0.00438 | 1.00E-05 | 0.89925 | 0.80769 | (Right-Caudate)(rh.bankssts_2)(rh.inferiorparietal_9)(rh.precuneus_2)                         |
| 0.00438 | 1.00E-05 | 0.89925 | 0.80769 | (rh.bankssts_2)(rh.fusiform_7)(rh.insula_5)(rh.parahippocampal_3)                             |
| 0.00438 | 1.00E-05 | 0.89925 | 0.80769 | (Right-Caudate)(rh.inferiorparietal_9)(rh.isthmuscingulate_2)(rh.superiortemporal_3)          |
| 0.00438 | 1.00E-05 | 0.89925 | 0.80769 | (rh.fusiform_7)(rh.insula_5)(rh.parahippocampal_2)(rh.precuneus_2)                            |
| 0.00439 | 1.00E-05 | 0.8806  | 0.78365 | (rh.inferiorparietal_9)(rh.precuneus_2)(rh.precuneus_3)(rh.superiortemporal_3)                |
| 0.00441 | 1.00E-05 | 0.89552 | 0.80288 | (Right-Caudate)(rh.inferiorparietal_9)(rh.insula_2)(rh.superiortemporal_3)                    |
| 0.00441 | 1.00E-05 | 0.89552 | 0.80288 | (rh.inferiorparietal_10)(rh.inferiorparietal_9)(rh.lingual_7)(rh.precuneus_2)                 |
| 0.00441 | 1.00E-05 | 0.89552 | 0.80288 | (rh.fusiform_7)(rh.insula_5)(rh.parahippocampal_3)(rh.superiortemporal_3)                     |
| 0.00441 | 1.00E-05 | 0.89552 | 0.80288 | (Right-Caudate)(rh.bankssts_2)(rh.fusiform_7)(rh.parahippocampal_3)                           |
| 0.00441 | 1.00E-05 | 0.89552 | 0.80288 | (rh.bankssts_2)(rh.inferiorparietal_9)(rh.precuneus_2)(rh.supramarginal_9)                    |
| 0.00441 | 1.00E-05 | 0.89552 | 0.80288 | (rh.inferiorparietal_10)(rh.inferiorparietal_9)(rh.isthmuscingulate_2)(rh.superiortemporal_3) |
| 0.00441 | 1.00E-05 | 0.89552 | 0.80288 | (Right-Thalamus-Proper)(rh.inferiorparietal_10)(rh.inferiorparietal_9)(rh.superiortemporal_3) |
| 0.00441 | 1.00E-05 | 0.89552 | 0.80288 | (rh.bankssts_2)(rh.inferiorparietal_10)(rh.inferiorparietal_9)(rh.precuneus_2)                |
| 0.00441 | 1.00E-05 | 0.89552 | 0.80288 | (Right-Caudate)(rh.inferiorparietal_9)(rh.insula_2)(rh.parahippocampal_2)                     |
| 0.00441 | 1.00E-05 | 0.89552 | 0.80288 | (Right-Caudate)(rh.fusiform_7)(rh.lingual_7)(rh.parahippocampal_3)                            |
| 0.00441 | 1.00E-05 | 0.89552 | 0.80288 | (Right-Putamen)(rh.inferiorparietal_10)(rh.inferiorparietal_9)(rh.superiortemporal_3)         |
| 0.00441 | 1.00E-05 | 0.89552 | 0.80288 | (rh.inferiorparietal_9)(rh.lingual_7)(rh.precuneus_2)(rh.supramarginal_9)                     |
| 0.00442 | 1.00E-05 | 0.88806 | 0.79327 | (rh.inferiorparietal_10)(rh.inferiorparietal_9)(rh.parahippocampal_2)(rh.precuneus_2)         |
| 0.00442 | 1.00E-05 | 0.88806 | 0.79327 | (Right-Thalamus-Proper)(rh.fusiform_7)(rh.fusiform_8)(rh.parahippocampal_3)                   |
| 0.00442 | 1.00E-05 | 0.88806 | 0.79327 | (Right-Caudate)(rh.inferiorparietal_10)(rh.inferiorparietal_9)(rh.superiortemporal_3)         |
| 0.00442 | 1.00E-05 | 0.88806 | 0.79327 | (rh.inferiorparietal_9)(rh.insula_2)(rh.parahippocampal_2)(rh.supramarginal_9)                |
| 0.00442 | 1.00E-05 | 0.88806 | 0.79327 | (rh.fusiform_7)(rh.fusiform_8)(rh.isthmuscingulate_2)(rh.parahippocampal_3)                   |
| 0.00442 | 1.00E-05 | 0.88806 | 0.79327 | (rh.fusiform_7)(rh.fusiform_8)(rh.parahippocampal_3)                                          |
| 0.00442 | 1.00E-05 | 0.88806 | 0.79327 | (rh.fusiform_7)(rh.fusiform_8)(rh.insula_2)(rh.parahippocampal_3)                             |
| 0.00442 | 1.00E-05 | 0.88806 | 0.79327 | (rh.fusiform_7)(rh.parahippocampal_3)(rh.superiortemporal_3)(rh.supramarginal_9)              |
| 0.00442 | 1.00E-05 | 0.88806 | 0.79327 | (Right-Pallidum)(rh.fusiform_7)(rh.fusiform_8)(rh.parahippocampal_3)                          |
| 0.00442 | 1.00E-05 | 0.88806 | 0.79327 | (Right-Putamen)(rh.fusiform_7)(rh.fusiform_8)(rh.parahippocampal_3)                           |
| 0.00442 | 1.00E-05 | 0.89179 | 0.79808 | (rh.inferiorparietal_10)(rh.inferiorparietal_9)(rh.insula_2)(rh.superiortemporal_3)           |
| 0.00442 | 1.00E-05 | 0.89179 | 0.79808 | (rh.bankssts_2)(rh.fusiform_7)(rh.parahippocampal_3)(rh.supramarginal_9)                      |
| 0.00442 | 1.00E-05 | 0.89179 | 0.79808 | (Right-Thalamus-Proper)(rh.fusiform_7)(rh.fusiform_8)(rh.precuneus_2)                         |
| 0.00442 | 1.00E-05 | 0.89179 | 0.79808 | (rh.fusiform_7)(rh.fusiform_8)(rh.insula_2)(rh.precuneus_2)                                   |
| 0.00442 | 1.00E-05 | 0.89179 | 0.79808 | (rh.fusiform_7)(rh.fusiform_8)(rh.isthmuscingulate_2)(rh.precuneus_2)                         |
| 0.00442 | 1.00E-05 | 0.89179 | 0.79808 | (rh.fusiform_7)(rh.fusiform_8)(rh.precuneus_2)                                                |

|         |          |         |         |                                                                                       |
|---------|----------|---------|---------|---------------------------------------------------------------------------------------|
| 0.00442 | 1.00E-05 | 0.89179 | 0.79808 | (Right-Pallidum)(rh.inferiorparietal_9)(rh.parahippocampal_2)(rh.superiortemporal_3)  |
| 0.00442 | 1.00E-05 | 0.89179 | 0.79808 | (Right-Putamen)(rh.fusiform_7)(rh.fusiform_8)(rh.precuneus_2)                         |
| 0.00442 | 1.00E-05 | 0.89179 | 0.79808 | (Right-Pallidum)(rh.inferiorparietal_9)(rh.parahippocampal_2)(rh.precuneus_2)         |
| 0.00442 | 1.00E-05 | 0.89179 | 0.79808 | (Right-Pallidum)(rh.fusiform_7)(rh.fusiform_8)(rh.precuneus_2)                        |
| 0.00442 | 1.00E-05 | 0.89179 | 0.79808 | (Right-Caudate)(rh.fusiform_7)(rh.parahippocampal_3)(rh.superiortemporal_3)           |
| 0.00442 | 1.00E-05 | 0.89179 | 0.79808 | (rh.fusiform_7)(rh.lingual_7)(rh.parahippocampal_3)(rh.supramarginal_9)               |
| 0.00444 | 1.00E-05 | 0.81343 | 0.70192 | (rh.fusiform_7)(rh.precuneus_4)(rh.precuneus_7)(rh.supramarginal_9)                   |
| 0.00444 | 1.00E-05 | 0.81343 | 0.70192 | (rh.inferiorparietal_9)(rh.inferiortemporal_2)(rh.lingual_7)(rh.precuneus_2)          |
| 0.00444 | 1.00E-05 | 0.81343 | 0.70192 | (rh.entorhinal_1)(rh.fusiform_7)(rh.isthmuscingulate_1)(rh.precuneus_2)               |
| 0.00444 | 1.00E-05 | 0.81343 | 0.70192 | (rh.fusiform_7)(rh.fusiform_8)(rh.inferiorparietal_9)(rh.insula_4)                    |
| 0.00444 | 1.00E-05 | 0.81343 | 0.70192 | (rh.bankssts_2)(rh.inferiorparietal_9)(rh.inferiortemporal_2)(rh.precuneus_2)         |
| 0.00444 | 1.00E-05 | 0.81343 | 0.70192 | (Right-Accumbens-area)(rh.fusiform_7)(rh.parahippocampal_3)(rh.superiortemporal_6)    |
| 0.00444 | 1.00E-05 | 0.81343 | 0.70192 | (rh.entorhinal_1)(rh.fusiform_7)(rh.parahippocampal_3)(rh.precuneus_4)                |
| 0.00458 | 1.00E-05 | 0.81716 | 0.70673 | (rh.entorhinal_1)(rh.inferiorparietal_10)(rh.inferiorparietal_9)(rh.precuneus_2)      |
| 0.00458 | 1.00E-05 | 0.81716 | 0.70673 | (rh.entorhinal_1)(rh.fusiform_8)(rh.inferiorparietal_9)(rh.precuneus_2)               |
| 0.00458 | 1.00E-05 | 0.81716 | 0.70673 | (Right-Caudate)(rh.fusiform_7)(rh.inferiorparietal_9)(rh.precuneus_3)                 |
| 0.00472 | 1.00E-05 | 0.8209  | 0.71154 | (Right-Caudate)(rh.entorhinal_1)(rh.inferiorparietal_9)(rh.precuneus_2)               |
| 0.00472 | 1.00E-05 | 0.8209  | 0.71154 | (rh.fusiform_7)(rh.precuneus_4)(rh.precuneus_7)(rh.superiortemporal_3)                |
| 0.00472 | 1.00E-05 | 0.8209  | 0.71154 | (Right-Caudate)(rh.fusiform_7)(rh.precuneus_4)(rh.precuneus_7)                        |
| 0.00472 | 1.00E-05 | 0.8209  | 0.71154 | (rh.fusiform_7)(rh.inferiorparietal_9)(rh.superiortemporal_1)(rh.superiortemporal_3)  |
| 0.00486 | 1.00E-05 | 0.82463 | 0.71635 | (rh.bankssts_2)(rh.fusiform_7)(rh.inferiorparietal_9)(rh.superiortemporal_1)          |
| 0.00486 | 1.00E-05 | 0.82463 | 0.71635 | (rh.entorhinal_1)(rh.inferiorparietal_9)(rh.parahippocampal_3)(rh.superiortemporal_3) |
| 0.00486 | 1.00E-05 | 0.82463 | 0.71635 | (rh.fusiform_7)(rh.lingual_7)(rh.precuneus_4)(rh.precuneus_7)                         |
| 0.00486 | 1.00E-05 | 0.82463 | 0.71635 | (Right-Pallidum)(rh.fusiform_7)(rh.inferiorparietal_9)(rh.precuneus_3)                |
| 0.00486 | 1.00E-05 | 0.82463 | 0.71635 | (Right-Caudate)(rh.fusiform_7)(rh.inferiorparietal_4)(rh.inferiorparietal_9)          |
| 0.00486 | 1.00E-05 | 0.82463 | 0.71635 | (rh.fusiform_7)(rh.inferiorparietal_9)(rh.lingual_7)(rh.superiortemporal_1)           |
| 0.00486 | 1.00E-05 | 0.82463 | 0.71635 | (rh.bankssts_2)(rh.fusiform_7)(rh.precuneus_4)(rh.precuneus_7)                        |
| 0.00494 | 1.00E-05 | 0.97761 | 0.92308 | (Right-Caudate)(rh.bankssts_2)(rh.precuneus_2)(rh.superiortemporal_3)                 |
| 0.00494 | 1.00E-05 | 0.97761 | 0.92308 | (Right-Caudate)(rh.lingual_7)(rh.precuneus_2)(rh.superiortemporal_3)                  |
| 0.00499 | 1.00E-05 | 0.82836 | 0.72115 | (rh.fusiform_7)(rh.isthmuscingulate_1)(rh.parahippocampal_3)(rh.precuneus_2)          |
| 0.00499 | 1.00E-05 | 0.82836 | 0.72115 | (rh.fusiform_7)(rh.inferiorparietal_10)(rh.inferiorparietal_9)(rh.insula_5)           |
| 0.00499 | 1.00E-05 | 0.82836 | 0.72115 | (rh.fusiform_7)(rh.inferiorparietal_4)(rh.inferiorparietal_9)(rh.insula_5)            |
| 0.00499 | 1.00E-05 | 0.82836 | 0.72115 | (rh.fusiform_7)(rh.inferiorparietal_4)(rh.parahippocampal_3)(rh.precuneus_4)          |
| 0.00499 | 1.00E-05 | 0.82836 | 0.72115 | (rh.entorhinal_1)(rh.inferiorparietal_9)(rh.lingual_7)(rh.parahippocampal_3)          |
| 0.00499 | 1.00E-05 | 0.82836 | 0.72115 | (rh.bankssts_2)(rh.entorhinal_1)(rh.inferiorparietal_9)(rh.parahippocampal_3)         |

|         |          |         |         |                                                                                       |
|---------|----------|---------|---------|---------------------------------------------------------------------------------------|
| 0.00513 | 1.00E-05 | 0.83209 | 0.72596 | (rh.fusiform_7)(rh.parahippocampal_2)(rh.parahippocampal_3)(rh.precuneus_4)           |
| 0.00513 | 1.00E-05 | 0.83209 | 0.72596 | (rh.entorhinal_1)(rh.inferiorparietal_9)(rh.lingual_7)(rh.superiortemporal_3)         |
| 0.00513 | 1.00E-05 | 0.83209 | 0.72596 | (Right-Pallidum)(rh.fusiform_7)(rh.inferiorparietal_4)(rh.inferiorparietal_9)         |
| 0.00513 | 1.00E-05 | 0.83209 | 0.72596 | (rh.fusiform_7)(rh.inferiorparietal_9)(rh.insula_4)(rh.superiortemporal_9)            |
| 0.00513 | 1.00E-05 | 0.83209 | 0.72596 | (rh.inferiorparietal_9)(rh.precuneus_2)(rh.precuneus_4)(rh.supramarginal_9)           |
| 0.00513 | 1.00E-05 | 0.83209 | 0.72596 | (rh.bankssts_2)(rh.entorhinal_1)(rh.inferiorparietal_9)(rh.superiortemporal_3)        |
| 0.00513 | 1.00E-05 | 0.83209 | 0.72596 | (rh.fusiform_7)(rh.inferiorparietal_10)(rh.inferiorparietal_9)(rh.superiortemporal_9) |
| 0.00513 | 1.00E-05 | 0.83209 | 0.72596 | (rh.fusiform_8)(rh.inferiorparietal_9)(rh.parahippocampal_3)(rh.superiortemporal_3)   |
| 0.00513 | 1.00E-05 | 0.83209 | 0.72596 | (rh.fusiform_8)(rh.inferiorparietal_9)(rh.parahippocampal_2)(rh.precuneus_2)          |
| 0.00513 | 1.00E-05 | 0.83209 | 0.72596 | (rh.inferiorparietal_10)(rh.inferiorparietal_9)(rh.precuneus_2)(rh.precuneus_4)       |
| 0.00526 | 1.00E-05 | 0.83582 | 0.73077 | (Right-Caudate)(rh.inferiorparietal_9)(rh.precuneus_2)(rh.precuneus_4)                |
| 0.00526 | 1.00E-05 | 0.83582 | 0.73077 | (rh.fusiform_7)(rh.parahippocampal_3)(rh.precuneus_4)(rh.superiortemporal_9)          |
| 0.00526 | 1.00E-05 | 0.83582 | 0.73077 | (rh.fusiform_8)(rh.inferiorparietal_9)(rh.lingual_7)(rh.parahippocampal_3)            |
| 0.00526 | 1.00E-05 | 0.83582 | 0.73077 | (rh.entorhinal_1)(rh.fusiform_7)(rh.precuneus_2)(rh.superiortemporal_6)               |
| 0.00526 | 1.00E-05 | 0.83582 | 0.73077 | (rh.bankssts_2)(rh.entorhinal_1)(rh.inferiorparietal_9)(rh.lingual_7)                 |
| 0.00526 | 1.00E-05 | 0.83582 | 0.73077 | (rh.fusiform_7)(rh.isthmuscingulate_1)(rh.parahippocampal_2)(rh.precuneus_2)          |
| 0.00526 | 1.00E-05 | 0.83582 | 0.73077 | (rh.inferiorparietal_9)(rh.insula_2)(rh.parahippocampal_2)(rh.precuneus_4)            |
| 0.00526 | 1.00E-05 | 0.83582 | 0.73077 | (rh.fusiform_8)(rh.inferiorparietal_9)(rh.precuneus_2)(rh.superiortemporal_3)         |
| 0.00526 | 1.00E-05 | 0.83582 | 0.73077 | (rh.bankssts_2)(rh.fusiform_8)(rh.inferiorparietal_9)(rh.parahippocampal_3)           |
| 0.00539 | 1.00E-05 | 0.83955 | 0.73558 | (rh.fusiform_8)(rh.inferiorparietal_9)(rh.lingual_7)(rh.precuneus_2)                  |
| 0.00539 | 1.00E-05 | 0.83955 | 0.73558 | (rh.bankssts_2)(rh.fusiform_8)(rh.inferiorparietal_9)(rh.precuneus_2)                 |
| 0.00552 | 1.00E-05 | 0.84328 | 0.74038 | (Right-Thalamus-Proper)(rh.inferiorparietal_9)(rh.precuneus_2)(rh.precuneus_4)        |
| 0.00552 | 1.00E-05 | 0.84328 | 0.74038 | (rh.inferiorparietal_9)(rh.isthmuscingulate_2)(rh.precuneus_2)(rh.precuneus_4)        |
| 0.00552 | 1.00E-05 | 0.84328 | 0.74038 | (Right-Pallidum)(rh.fusiform_7)(rh.isthmuscingulate_1)(rh.precuneus_2)                |
| 0.00552 | 1.00E-05 | 0.84328 | 0.74038 | (rh.inferiorparietal_9)(rh.precuneus_2)(rh.precuneus_7)(rh.superiortemporal_3)        |
| 0.00552 | 1.00E-05 | 0.84328 | 0.74038 | (rh.inferiorparietal_9)(rh.precuneus_2)(rh.precuneus_4)                               |
| 0.00552 | 1.00E-05 | 0.84328 | 0.74038 | (Right-Putamen)(rh.inferiorparietal_9)(rh.precuneus_2)(rh.precuneus_4)                |
| 0.00552 | 1.00E-05 | 0.84328 | 0.74038 | (Right-Accumbens-area)(rh.fusiform_7)(rh.parahippocampal_3)(rh.superiortemporal_3)    |
| 0.00553 | 1.00E-05 | 0.98507 | 0.9375  | (Right-Putamen)(rh.insula_2)(rh.precuneus_2)(rh.superiortemporal_3)                   |
| 0.00553 | 1.00E-05 | 0.98507 | 0.9375  | (rh.insula_2)(rh.isthmuscingulate_2)(rh.precuneus_2)(rh.superiortemporal_3)           |
| 0.00553 | 1.00E-05 | 0.98507 | 0.9375  | (Right-Thalamus-Proper)(rh.insula_2)(rh.precuneus_2)(rh.superiortemporal_3)           |
| 0.00553 | 1.00E-05 | 0.98507 | 0.9375  | (rh.insula_2)(rh.precuneus_2)(rh.superiortemporal_3)                                  |
| 0.00555 | 1.00E-05 | 0.83582 | 0.73148 | (rh.fusiform_7)(rh.inferiorparietal_4)(rh.inferiorparietal_9)                         |
| 0.00564 | 1.00E-05 | 0.84701 | 0.74519 | (rh.fusiform_7)(rh.precuneus_2)(rh.superiortemporal_10)(rh.supramarginal_9)           |
| 0.00564 | 1.00E-05 | 0.84701 | 0.74519 | (Right-Pallidum)(rh.fusiform_7)(rh.precuneus_4)(rh.supramarginal_9)                   |



|         |          |         |         |                                                                                             |
|---------|----------|---------|---------|---------------------------------------------------------------------------------------------|
| 0.00564 | 1.00E-05 | 0.84701 | 0.74519 | (rh.fusiform_7)(rh.parahippocampal_2)(rh.precuneus_2)(rh.superiortemporal_10)               |
| 0.00564 | 1.00E-05 | 0.84701 | 0.74519 | (Right-Accumbens-area)(rh.bankssts_2)(rh.fusiform_7)(rh.parahippocampal_3)                  |
| 0.00564 | 1.00E-05 | 0.84701 | 0.74519 | (rh.bankssts_1)(rh.inferiorparietal_9)(rh.parahippocampal_2)(rh.precuneus_2)                |
| 0.00568 | 1.00E-05 | 0.88806 | 0.7963  | (Right-Pallidum)(rh.inferiorparietal_9)(rh.supramarginal_9)                                 |
| 0.00568 | 1.00E-05 | 0.88806 | 0.7963  | (Right-Caudate)(Right-Pallidum)(rh.inferiorparietal_9)(rh.precuneus_2)                      |
| 0.00568 | 1.00E-05 | 0.88806 | 0.7963  | (rh.inferiorparietal_4)(rh.inferiorparietal_9)(rh.insula_2)(rh.precuneus_2)                 |
| 0.00568 | 1.00E-05 | 0.88806 | 0.7963  | (Right-Pallidum)(rh.inferiorparietal_10)(rh.inferiorparietal_9)                             |
| 0.00568 | 1.00E-05 | 0.88806 | 0.7963  | (rh.inferiorparietal_4)(rh.inferiorparietal_9)(rh.superiortemporal_3)                       |
| 0.00568 | 1.00E-05 | 0.88806 | 0.7963  | (rh.inferiorparietal_4)(rh.inferiorparietal_9)(rh.lingual_7)(rh.precuneus_2)                |
| 0.00573 | 1.00E-05 | 0.80224 | 0.69231 | (Right-Accumbens-area)(Right-Putamen)(rh.inferiorparietal_9)(rh.precuneus_2)                |
| 0.00573 | 1.00E-05 | 0.80224 | 0.69231 | (Right-Accumbens-area)(Right-Thalamus-Proper)(rh.inferiorparietal_9)(rh.precuneus_2)        |
| 0.00573 | 1.00E-05 | 0.80224 | 0.69231 | (rh.inferiorparietal_9)(rh.insula_5)(rh.precuneus_4)(rh.supramarginal_9)                    |
| 0.00573 | 1.00E-05 | 0.80224 | 0.69231 | (Right-Accumbens-area)(Right-Pallidum)(rh.inferiorparietal_9)(rh.precuneus_2)               |
| 0.00573 | 1.00E-05 | 0.80224 | 0.69231 | (Right-Accumbens-area)(rh.inferiorparietal_9)(rh.precuneus_2)                               |
| 0.00573 | 1.00E-05 | 0.80224 | 0.69231 | (Right-Accumbens-area)(rh.inferiorparietal_9)(rh.insula_2)(rh.precuneus_2)                  |
| 0.00573 | 1.00E-05 | 0.80224 | 0.69231 | (Right-Accumbens-area)(rh.inferiorparietal_9)(rh.isthmuscingulate_2)(rh.precuneus_2)        |
| 0.00576 | 1.00E-05 | 0.85075 | 0.75    | (rh.inferiorparietal_9)(rh.parahippocampal_2)(rh.parahippocampal_3)(rh.superiortemporal_10) |
| 0.00576 | 1.00E-05 | 0.85075 | 0.75    | (Right-Putamen)(rh.fusiform_7)(rh.parahippocampal_3)(rh.superiortemporal_10)                |
| 0.00576 | 1.00E-05 | 0.85075 | 0.75    | (rh.fusiform_7)(rh.isthmuscingulate_2)(rh.parahippocampal_2)(rh.precuneus_4)                |
| 0.00576 | 1.00E-05 | 0.85075 | 0.75    | (rh.fusiform_7)(rh.insula_5)(rh.parahippocampal_3)(rh.superiortemporal_10)                  |
| 0.00576 | 1.00E-05 | 0.85075 | 0.75    | (rh.fusiform_7)(rh.isthmuscingulate_2)(rh.parahippocampal_3)(rh.superiortemporal_10)        |
| 0.00576 | 1.00E-05 | 0.85075 | 0.75    | (Right-Accumbens-area)(rh.bankssts_2)(rh.fusiform_7)(rh.superiortemporal_3)                 |
| 0.00576 | 1.00E-05 | 0.85075 | 0.75    | (rh.fusiform_7)(rh.parahippocampal_3)(rh.superiortemporal_10)                               |
| 0.00576 | 1.00E-05 | 0.85075 | 0.75    | (Right-Thalamus-Proper)(rh.fusiform_7)(rh.parahippocampal_3)(rh.superiortemporal_10)        |
| 0.00576 | 1.00E-05 | 0.85075 | 0.75    | (Right-Thalamus-Proper)(rh.fusiform_7)(rh.parahippocampal_2)(rh.precuneus_4)                |
| 0.00576 | 1.00E-05 | 0.85075 | 0.75    | (rh.inferiorparietal_9)(rh.insula_5)(rh.parahippocampal_3)(rh.superiortemporal_3)           |
| 0.00576 | 1.00E-05 | 0.85075 | 0.75    | (Right-Putamen)(rh.fusiform_7)(rh.parahippocampal_2)(rh.precuneus_4)                        |
| 0.00576 | 1.00E-05 | 0.85075 | 0.75    | (rh.fusiform_7)(rh.insula_2)(rh.parahippocampal_2)(rh.precuneus_4)                          |
| 0.00576 | 1.00E-05 | 0.85075 | 0.75    | (Right-Pallidum)(rh.fusiform_7)(rh.parahippocampal_3)(rh.superiortemporal_10)               |
| 0.00576 | 1.00E-05 | 0.85075 | 0.75    | (Right-Accumbens-area)(rh.fusiform_7)(rh.lingual_7)(rh.superiortemporal_3)                  |
| 0.00576 | 1.00E-05 | 0.85075 | 0.75    | (rh.fusiform_7)(rh.insula_2)(rh.parahippocampal_3)(rh.superiortemporal_10)                  |
| 0.00578 | 1.00E-05 | 0.8806  | 0.78704 | (rh.inferiorparietal_9)(rh.superiortemporal_1)(rh.supramarginal_9)                          |
| 0.00582 | 1.00E-05 | 0.85821 | 0.75926 | (rh.bankssts_1)(rh.inferiorparietal_9)                                                      |
| 0.00588 | 1.00E-05 | 0.85448 | 0.75481 | (rh.bankssts_2)(rh.inferiorparietal_9)(rh.parahippocampal_2)(rh.parahippocampal_3)          |
| 0.00588 | 1.00E-05 | 0.85448 | 0.75481 | (rh.bankssts_1)(rh.bankssts_2)(rh.inferiorparietal_9)(rh.superiortemporal_3)                |

|         |          |         |         |                                                                                              |
|---------|----------|---------|---------|----------------------------------------------------------------------------------------------|
| 0.00588 | 1.00E-05 | 0.85448 | 0.75481 | (rh.inferiorparietal_9)(rh.insula_5)(rh.parahippocampal_2)(rh.supramarginal_9)               |
| 0.00588 | 1.00E-05 | 0.85448 | 0.75481 | (Right-Pallidum)(rh.fusiform_7)(rh.precuneus_4)(rh.superiortemporal_3)                       |
| 0.00588 | 1.00E-05 | 0.85448 | 0.75481 | (rh.bankssts_2)(rh.inferiorparietal_9)(rh.insula_5)(rh.parahippocampal_3)                    |
| 0.00588 | 1.00E-05 | 0.85448 | 0.75481 | (rh.inferiorparietal_9)(rh.insula_5)(rh.lingual_7)(rh.parahippocampal_3)                     |
| 0.00588 | 1.00E-05 | 0.85448 | 0.75481 | (rh.inferiorparietal_9)(rh.lingual_7)(rh.parahippocampal_2)(rh.parahippocampal_3)            |
| 0.00588 | 1.00E-05 | 0.85448 | 0.75481 | (Right-Caudate)(rh.fusiform_7)(rh.insula_2)(rh.precuneus_4)                                  |
| 0.00588 | 1.00E-05 | 0.85448 | 0.75481 | (Right-Caudate)(rh.fusiform_7)(rh.isthmuscingulate_2)(rh.precuneus_4)                        |
| 0.00588 | 1.00E-05 | 0.85448 | 0.75481 | (Right-Caudate)(Right-Putamen)(rh.fusiform_7)(rh.precuneus_4)                                |
| 0.00588 | 1.00E-05 | 0.85448 | 0.75481 | (Right-Caudate)(Right-Thalamus-Proper)(rh.fusiform_7)(rh.precuneus_4)                        |
| 0.00588 | 1.00E-05 | 0.85448 | 0.75481 | (Right-Caudate)(rh.fusiform_7)(rh.precuneus_4)                                               |
| 0.00588 | 1.00E-05 | 0.85448 | 0.75481 | (Right-Accumbens-area)(rh.bankssts_2)(rh.fusiform_7)(rh.lingual_7)                           |
| 0.00592 | 1.00E-05 | 0.80597 | 0.69712 | (rh.inferiorparietal_9)(rh.precuneus_2)(rh.precuneus_4)(rh.superiortemporal_9)               |
| 0.00599 | 1.00E-05 | 0.85821 | 0.75962 | (Right-Thalamus-Proper)(rh.inferiorparietal_9)(rh.parahippocampal_3)(rh.superiortemporal_10) |
| 0.00599 | 1.00E-05 | 0.85821 | 0.75962 | (Right-Thalamus-Proper)(rh.fusiform_7)(rh.precuneus_2)(rh.superiortemporal_10)               |
| 0.00599 | 1.00E-05 | 0.85821 | 0.75962 | (rh.fusiform_7)(rh.precuneus_2)(rh.superiortemporal_6)(rh.supramarginal_9)                   |
| 0.00599 | 1.00E-05 | 0.85821 | 0.75962 | (rh.fusiform_7)(rh.insula_5)(rh.precuneus_2)(rh.superiortemporal_10)                         |
| 0.00599 | 1.00E-05 | 0.85821 | 0.75962 | (Right-Pallidum)(rh.bankssts_2)(rh.fusiform_7)(rh.precuneus_4)                               |
| 0.00599 | 1.00E-05 | 0.85821 | 0.75962 | (Right-Putamen)(rh.inferiorparietal_9)(rh.parahippocampal_3)(rh.superiortemporal_3)          |
| 0.00599 | 1.00E-05 | 0.85821 | 0.75962 | (rh.fusiform_7)(rh.insula_2)(rh.precuneus_2)(rh.superiortemporal_10)                         |
| 0.00599 | 1.00E-05 | 0.85821 | 0.75962 | (Right-Pallidum)(rh.fusiform_7)(rh.lingual_7)(rh.precuneus_4)                                |
| 0.00599 | 1.00E-05 | 0.85821 | 0.75962 | (rh.fusiform_7)(rh.isthmuscingulate_2)(rh.precuneus_2)(rh.superiortemporal_10)               |
| 0.00599 | 1.00E-05 | 0.85821 | 0.75962 | (rh.fusiform_7)(rh.fusiform_8)(rh.superiortemporal_3)(rh.superiortemporal_6)                 |
| 0.00599 | 1.00E-05 | 0.85821 | 0.75962 | (Right-Pallidum)(rh.inferiorparietal_9)(rh.parahippocampal_3)(rh.superiortemporal_3)         |
| 0.00599 | 1.00E-05 | 0.85821 | 0.75962 | (rh.fusiform_7)(rh.precuneus_2)(rh.superiortemporal_10)                                      |
| 0.00599 | 1.00E-05 | 0.85821 | 0.75962 | (Right-Caudate)(rh.fusiform_7)(rh.precuneus_2)(rh.precuneus_7)                               |
| 0.00599 | 1.00E-05 | 0.85821 | 0.75962 | (rh.inferiorparietal_4)(rh.inferiorparietal_9)(rh.insula_5)(rh.precuneus_2)                  |
| 0.00599 | 1.00E-05 | 0.85821 | 0.75962 | (rh.inferiorparietal_9)(rh.isthmuscingulate_2)(rh.parahippocampal_3)(rh.superiortemporal_10) |
| 0.00599 | 1.00E-05 | 0.85821 | 0.75962 | (Right-Pallidum)(rh.fusiform_7)(rh.precuneus_2)(rh.superiortemporal_10)                      |
| 0.00599 | 1.00E-05 | 0.85821 | 0.75962 | (Right-Putamen)(rh.fusiform_7)(rh.precuneus_2)(rh.superiortemporal_10)                       |
| 0.00599 | 1.00E-05 | 0.85821 | 0.75962 | (rh.inferiorparietal_9)(rh.parahippocampal_3)(rh.superiortemporal_3)                         |
| 0.00599 | 1.00E-05 | 0.85821 | 0.75962 | (rh.inferiorparietal_9)(rh.insula_2)(rh.parahippocampal_3)(rh.superiortemporal_3)            |
| 0.00599 | 1.00E-05 | 0.85821 | 0.75962 | (rh.fusiform_7)(rh.inferiortemporal_2)(rh.precuneus_2)(rh.superiortemporal_3)                |
| 0.00599 | 1.00E-05 | 0.85821 | 0.75962 | (rh.fusiform_7)(rh.precuneus_2)(rh.precuneus_7)(rh.superiortemporal_3)                       |
| 0.00599 | 1.00E-05 | 0.92537 | 0.84615 | (Right-Putamen)(rh.fusiform_7)(rh.isthmuscingulate_2)(rh.lingual_7)                          |
| 0.00599 | 1.00E-05 | 0.92537 | 0.84615 | (Right-Putamen)(rh.fusiform_7)(rh.insula_2)(rh.lingual_7)                                    |

|         |          |         |         |                                                                                     |
|---------|----------|---------|---------|-------------------------------------------------------------------------------------|
| 0.00599 | 1.00E-05 | 0.92537 | 0.84615 | (rh.fusiform_7)(rh.lingual_7)                                                       |
| 0.00599 | 1.00E-05 | 0.92537 | 0.84615 | (rh.bankssts_2)(rh.fusiform_7)(rh.insula_2)                                         |
| 0.00599 | 1.00E-05 | 0.92537 | 0.84615 | (Right-Thalamus-Proper)(rh.fusiform_7)(rh.insula_2)(rh.lingual_7)                   |
| 0.00599 | 1.00E-05 | 0.92537 | 0.84615 | (rh.fusiform_7)(rh.insula_2)(rh.lingual_7)                                          |
| 0.00599 | 1.00E-05 | 0.92537 | 0.84615 | (Right-Putamen)(Right-Thalamus-Proper)(rh.bankssts_2)(rh.fusiform_7)                |
| 0.00599 | 1.00E-05 | 0.92537 | 0.84615 | (Right-Thalamus-Proper)(rh.bankssts_2)(rh.fusiform_7)(rh.isthmuscingulate_2)        |
| 0.00599 | 1.00E-05 | 0.92537 | 0.84615 | (Right-Thalamus-Proper)(rh.fusiform_7)(rh.isthmuscingulate_2)(rh.lingual_7)         |
| 0.00599 | 1.00E-05 | 0.92537 | 0.84615 | (Right-Thalamus-Proper)(rh.bankssts_2)(rh.fusiform_7)(rh.insula_2)                  |
| 0.00599 | 1.00E-05 | 0.92537 | 0.84615 | (rh.bankssts_2)(rh.fusiform_7)(rh.insula_2)(rh.isthmuscingulate_2)                  |
| 0.00599 | 1.00E-05 | 0.92537 | 0.84615 | (Right-Putamen)(rh.bankssts_2)(rh.fusiform_7)(rh.insula_2)                          |
| 0.00599 | 1.00E-05 | 0.92537 | 0.84615 | (Right-Putamen)(rh.fusiform_7)(rh.lingual_7)                                        |
| 0.00599 | 1.00E-05 | 0.92537 | 0.84615 | (Right-Thalamus-Proper)(rh.fusiform_7)(rh.lingual_7)                                |
| 0.00599 | 1.00E-05 | 0.92537 | 0.84615 | (rh.fusiform_7)(rh.insula_2)(rh.isthmuscingulate_2)(rh.lingual_7)                   |
| 0.00599 | 1.00E-05 | 0.92537 | 0.84615 | (Right-Putamen)(Right-Thalamus-Proper)(rh.fusiform_7)(rh.lingual_7)                 |
| 0.00599 | 1.00E-05 | 0.92537 | 0.84615 | (Right-Putamen)(rh.bankssts_2)(rh.fusiform_7)(rh.isthmuscingulate_2)                |
| 0.00599 | 1.00E-05 | 0.92537 | 0.84615 | (Right-Thalamus-Proper)(rh.bankssts_2)(rh.fusiform_7)                               |
| 0.00599 | 1.00E-05 | 0.92537 | 0.84615 | (rh.bankssts_2)(rh.fusiform_7)                                                      |
| 0.00599 | 1.00E-05 | 0.92537 | 0.84615 | (Right-Putamen)(rh.bankssts_2)(rh.fusiform_7)                                       |
| 0.00599 | 1.00E-05 | 0.92537 | 0.84615 | (rh.fusiform_7)(rh.isthmuscingulate_2)(rh.lingual_7)                                |
| 0.00599 | 1.00E-05 | 0.92537 | 0.84615 | (rh.bankssts_2)(rh.fusiform_7)(rh.isthmuscingulate_2)                               |
| 0.00609 | 1.00E-05 | 0.86194 | 0.76442 | (Right-Thalamus-Proper)(rh.fusiform_7)(rh.isthmuscingulate_2)(rh.precuneus_4)       |
| 0.00609 | 1.00E-05 | 0.86194 | 0.76442 | (Right-Putamen)(rh.fusiform_7)(rh.precuneus_4)                                      |
| 0.00609 | 1.00E-05 | 0.86194 | 0.76442 | (Right-Thalamus-Proper)(rh.fusiform_7)(rh.precuneus_4)                              |
| 0.00609 | 1.00E-05 | 0.86194 | 0.76442 | (Right-Thalamus-Proper)(rh.bankssts_2)(rh.inferiorparietal_9)(rh.parahippocampal_3) |
| 0.00609 | 1.00E-05 | 0.86194 | 0.76442 | (rh.fusiform_7)(rh.lingual_7)(rh.parahippocampal_3)(rh.superiortemporal_6)          |
| 0.00609 | 1.00E-05 | 0.86194 | 0.76442 | (rh.bankssts_2)(rh.fusiform_7)(rh.precuneus_2)(rh.precuneus_7)                      |
| 0.00609 | 1.00E-05 | 0.86194 | 0.76442 | (rh.inferiorparietal_9)(rh.isthmuscingulate_2)(rh.lingual_7)(rh.parahippocampal_3)  |
| 0.00609 | 1.00E-05 | 0.86194 | 0.76442 | (rh.inferiorparietal_9)(rh.lingual_7)(rh.parahippocampal_3)                         |
| 0.00609 | 1.00E-05 | 0.86194 | 0.76442 | (rh.inferiorparietal_9)(rh.insula_4)(rh.parahippocampal_2)(rh.precuneus_2)          |
| 0.00609 | 1.00E-05 | 0.86194 | 0.76442 | (Right-Pallidum)(rh.bankssts_2)(rh.inferiorparietal_9)(rh.parahippocampal_3)        |
| 0.00609 | 1.00E-05 | 0.86194 | 0.76442 | (Right-Putamen)(Right-Thalamus-Proper)(rh.fusiform_7)(rh.precuneus_4)               |
| 0.00609 | 1.00E-05 | 0.86194 | 0.76442 | (Right-Putamen)(rh.fusiform_7)(rh.isthmuscingulate_2)(rh.precuneus_4)               |
| 0.00609 | 1.00E-05 | 0.86194 | 0.76442 | (Right-Thalamus-Proper)(rh.inferiorparietal_9)(rh.lingual_7)(rh.parahippocampal_3)  |
| 0.00609 | 1.00E-05 | 0.86194 | 0.76442 | (rh.fusiform_7)(rh.isthmuscingulate_2)(rh.precuneus_4)                              |
| 0.00609 | 1.00E-05 | 0.86194 | 0.76442 | (Right-Caudate)(rh.inferiorparietal_9)(rh.insula_5)(rh.parahippocampal_2)           |

|         |          |         |         |                                                                                        |
|---------|----------|---------|---------|----------------------------------------------------------------------------------------|
| 0.00609 | 1.00E-05 | 0.86194 | 0.76442 | (Right-Thalamus-Proper)(rh.fusiform_7)(rh.insula_2)(rh.precuneus_4)                    |
| 0.00609 | 1.00E-05 | 0.86194 | 0.76442 | (rh.bankssts_2)(rh.fusiform_7)(rh.parahippocampal_3)(rh.superiortemporal_6)            |
| 0.00609 | 1.00E-05 | 0.86194 | 0.76442 | (Right-Pallidum)(rh.inferiorparietal_9)(rh.lingual_7)(rh.parahippocampal_3)            |
| 0.00609 | 1.00E-05 | 0.86194 | 0.76442 | (rh.bankssts_2)(rh.inferiorparietal_9)(rh.isthmuscingulate_2)(rh.parahippocampal_3)    |
| 0.00609 | 1.00E-05 | 0.86194 | 0.76442 | (rh.inferiorparietal_9)(rh.insula_2)(rh.lingual_7)(rh.parahippocampal_3)               |
| 0.00609 | 1.00E-05 | 0.86194 | 0.76442 | (rh.fusiform_7)(rh.insula_2)(rh.precuneus_4)                                           |
| 0.00609 | 1.00E-05 | 0.86194 | 0.76442 | (rh.fusiform_7)(rh.lingual_7)(rh.precuneus_2)(rh.precuneus_7)                          |
| 0.00609 | 1.00E-05 | 0.86194 | 0.76442 | (Right-Putamen)(rh.inferiorparietal_9)(rh.lingual_7)(rh.parahippocampal_3)             |
| 0.00609 | 1.00E-05 | 0.86194 | 0.76442 | (Right-Putamen)(rh.fusiform_7)(rh.insula_2)(rh.precuneus_4)                            |
| 0.00609 | 1.00E-05 | 0.86194 | 0.76442 | (rh.bankssts_2)(rh.inferiorparietal_9)(rh.insula_2)(rh.parahippocampal_3)              |
| 0.00609 | 1.00E-05 | 0.86194 | 0.76442 | (rh.fusiform_7)(rh.inferiortemporal_2)(rh.lingual_7)(rh.precuneus_2)                   |
| 0.00609 | 1.00E-05 | 0.86194 | 0.76442 | (rh.fusiform_7)(rh.precuneus_4)                                                        |
| 0.00609 | 1.00E-05 | 0.86194 | 0.76442 | (Right-Putamen)(rh.bankssts_2)(rh.inferiorparietal_9)(rh.parahippocampal_3)            |
| 0.00609 | 1.00E-05 | 0.86194 | 0.76442 | (rh.fusiform_7)(rh.insula_2)(rh.isthmuscingulate_2)(rh.precuneus_4)                    |
| 0.00609 | 1.00E-05 | 0.86194 | 0.76442 | (rh.bankssts_2)(rh.fusiform_7)(rh.inferiortemporal_2)(rh.precuneus_2)                  |
| 0.00609 | 1.00E-05 | 0.86194 | 0.76442 | (rh.bankssts_2)(rh.inferiorparietal_9)(rh.parahippocampal_3)                           |
| 0.00609 | 1.00E-05 | 0.86194 | 0.76442 | (rh.fusiform_7)(rh.parahippocampal_2)(rh.precuneus_2)(rh.superiortemporal_6)           |
| 0.00612 | 1.00E-05 | 0.8097  | 0.70192 | (Right-Accumbens-area)(Right-Caudate)(rh.fusiform_7)(rh.superiortemporal_10)           |
| 0.00612 | 1.00E-05 | 0.8097  | 0.70192 | (Right-Pallidum)(rh.inferiorparietal_9)(rh.precuneus_2)(rh.superiortemporal_10)        |
| 0.00612 | 1.00E-05 | 0.8097  | 0.70192 | (rh.inferiorparietal_9)(rh.parahippocampal_3)(rh.precuneus_2)(rh.superiortemporal_6)   |
| 0.00612 | 1.00E-05 | 0.8097  | 0.70192 | (Right-Thalamus-Proper)(rh.inferiorparietal_9)(rh.precuneus_2)(rh.superiortemporal_10) |
| 0.00612 | 1.00E-05 | 0.8097  | 0.70192 | (rh.inferiorparietal_9)(rh.insula_2)(rh.precuneus_2)(rh.superiortemporal_10)           |
| 0.00612 | 1.00E-05 | 0.8097  | 0.70192 | (rh.inferiorparietal_9)(rh.isthmuscingulate_2)(rh.precuneus_2)(rh.superiortemporal_10) |
| 0.00612 | 1.00E-05 | 0.8097  | 0.70192 | (rh.entorhinal_1)(rh.fusiform_7)(rh.precuneus_4)(rh.supramarginal_9)                   |
| 0.00612 | 1.00E-05 | 0.8097  | 0.70192 | (Right-Accumbens-area)(rh.fusiform_7)(rh.superiortemporal_6)(rh.supramarginal_9)       |
| 0.00612 | 1.00E-05 | 0.8097  | 0.70192 | (rh.inferiorparietal_9)(rh.insula_5)(rh.precuneus_2)(rh.superiortemporal_10)           |
| 0.00612 | 1.00E-05 | 0.8097  | 0.70192 | (rh.fusiform_7)(rh.fusiform_8)(rh.inferiorparietal_10)(rh.inferiorparietal_9)          |
| 0.00612 | 1.00E-05 | 0.8097  | 0.70192 | (rh.inferiorparietal_9)(rh.insula_5)(rh.precuneus_4)(rh.superiortemporal_3)            |
| 0.00612 | 1.00E-05 | 0.8097  | 0.70192 | (rh.inferiorparietal_9)(rh.precuneus_2)(rh.superiortemporal_10)                        |
| 0.00612 | 1.00E-05 | 0.8097  | 0.70192 | (Right-Putamen)(rh.inferiorparietal_9)(rh.precuneus_2)(rh.superiortemporal_10)         |
| 0.00615 | 1.00E-05 | 0.92164 | 0.84135 | (Right-Putamen)(rh.fusiform_7)(rh.insula_2)(rh.superiortemporal_3)                     |
| 0.00615 | 1.00E-05 | 0.92164 | 0.84135 | (rh.fusiform_7)(rh.insula_2)(rh.isthmuscingulate_2)(rh.superiortemporal_3)             |
| 0.00615 | 1.00E-05 | 0.92164 | 0.84135 | (Right-Putamen)(Right-Thalamus-Proper)(rh.fusiform_7)(rh.superiortemporal_3)           |
| 0.00615 | 1.00E-05 | 0.92164 | 0.84135 | (rh.fusiform_7)(rh.isthmuscingulate_2)(rh.superiortemporal_3)                          |
| 0.00615 | 1.00E-05 | 0.92164 | 0.84135 | (rh.fusiform_7)(rh.superiortemporal_3)                                                 |

|         |          |         |         |                                                                                       |
|---------|----------|---------|---------|---------------------------------------------------------------------------------------|
| 0.00615 | 1.00E-05 | 0.92164 | 0.84135 | (Right-Thalamus-Proper)(rh.fusiform_7)(rh.insula_2)(rh.superiortemporal_3)            |
| 0.00615 | 1.00E-05 | 0.92164 | 0.84135 | (Right-Pallidum)(rh.bankssts_2)(rh.fusiform_7)(rh.lingual_7)                          |
| 0.00615 | 1.00E-05 | 0.92164 | 0.84135 | (rh.fusiform_7)(rh.insula_2)(rh.superiortemporal_3)                                   |
| 0.00615 | 1.00E-05 | 0.92164 | 0.84135 | (Right-Putamen)(rh.fusiform_7)(rh.isthmuscingulate_2)(rh.superiortemporal_3)          |
| 0.00615 | 1.00E-05 | 0.92164 | 0.84135 | (Right-Thalamus-Proper)(rh.fusiform_7)(rh.superiortemporal_3)                         |
| 0.00615 | 1.00E-05 | 0.92164 | 0.84135 | (Right-Thalamus-Proper)(rh.fusiform_7)(rh.isthmuscingulate_2)(rh.superiortemporal_3)  |
| 0.00615 | 1.00E-05 | 0.92164 | 0.84135 | (Right-Putamen)(rh.fusiform_7)(rh.superiortemporal_3)                                 |
| 0.00619 | 1.00E-05 | 0.86567 | 0.76923 | (rh.inferiorparietal_9)(rh.precuneus_2)(rh.superiortemporal_3)(rh.superiortemporal_9) |
| 0.00627 | 1.00E-05 | 0.91791 | 0.83654 | (Right-Pallidum)(rh.fusiform_7)(rh.lingual_7)(rh.superiortemporal_3)                  |
| 0.00627 | 1.00E-05 | 0.91791 | 0.83654 | (Right-Pallidum)(rh.bankssts_2)(rh.fusiform_7)(rh.superiortemporal_3)                 |
| 0.00628 | 1.00E-05 | 0.8694  | 0.77404 | (Right-Thalamus-Proper)(rh.inferiorparietal_9)(rh.insula_5)(rh.parahippocampal_2)     |
| 0.00628 | 1.00E-05 | 0.8694  | 0.77404 | (rh.inferiorparietal_9)(rh.insula_5)(rh.parahippocampal_2)                            |
| 0.00628 | 1.00E-05 | 0.8694  | 0.77404 | (rh.fusiform_7)(rh.isthmuscingulate_2)(rh.precuneus_2)(rh.superiortemporal_6)         |
| 0.00628 | 1.00E-05 | 0.8694  | 0.77404 | (rh.inferiorparietal_9)(rh.lingual_7)(rh.precuneus_2)(rh.superiortemporal_9)          |
| 0.00628 | 1.00E-05 | 0.8694  | 0.77404 | (Right-Caudate)(rh.entorhinal_1)(rh.fusiform_7)(rh.precuneus_2)                       |
| 0.00628 | 1.00E-05 | 0.8694  | 0.77404 | (rh.fusiform_7)(rh.insula_2)(rh.precuneus_2)(rh.superiortemporal_6)                   |
| 0.00628 | 1.00E-05 | 0.8694  | 0.77404 | (rh.bankssts_2)(rh.inferiorparietal_9)(rh.precuneus_2)(rh.superiortemporal_9)         |
| 0.00628 | 1.00E-05 | 0.8694  | 0.77404 | (Right-Thalamus-Proper)(rh.fusiform_7)(rh.precuneus_2)(rh.superiortemporal_6)         |
| 0.00628 | 1.00E-05 | 0.8694  | 0.77404 | (rh.fusiform_7)(rh.precuneus_2)(rh.superiortemporal_6)                                |
| 0.00628 | 1.00E-05 | 0.8694  | 0.77404 | (Right-Putamen)(rh.inferiorparietal_9)(rh.insula_5)(rh.parahippocampal_2)             |
| 0.00628 | 1.00E-05 | 0.8694  | 0.77404 | (Right-Pallidum)(rh.fusiform_7)(rh.precuneus_2)(rh.superiortemporal_6)                |
| 0.00628 | 1.00E-05 | 0.8694  | 0.77404 | (Right-Putamen)(rh.fusiform_7)(rh.precuneus_2)(rh.superiortemporal_6)                 |
| 0.00628 | 1.00E-05 | 0.8694  | 0.77404 | (Right-Pallidum)(rh.inferiorparietal_9)(rh.insula_5)(rh.parahippocampal_2)            |
| 0.00628 | 1.00E-05 | 0.8694  | 0.77404 | (rh.entorhinal_1)(rh.fusiform_7)(rh.insula_4)(rh.precuneus_2)                         |
| 0.00628 | 1.00E-05 | 0.8694  | 0.77404 | (rh.inferiorparietal_9)(rh.insula_2)(rh.insula_5)(rh.parahippocampal_2)               |
| 0.00628 | 1.00E-05 | 0.8694  | 0.77404 | (rh.inferiorparietal_9)(rh.insula_5)(rh.isthmuscingulate_2)(rh.parahippocampal_2)     |
| 0.00632 | 1.00E-05 | 0.81343 | 0.70673 | (Right-Accumbens-area)(Right-Putamen)(rh.fusiform_7)(rh.superiortemporal_10)          |
| 0.00632 | 1.00E-05 | 0.81343 | 0.70673 | (Right-Accumbens-area)(Right-Pallidum)(rh.fusiform_7)(rh.superiortemporal_10)         |
| 0.00632 | 1.00E-05 | 0.81343 | 0.70673 | (rh.bankssts_2)(rh.inferiorparietal_9)(rh.insula_5)(rh.precuneus_4)                   |
| 0.00632 | 1.00E-05 | 0.81343 | 0.70673 | (Right-Putamen)(rh.inferiorparietal_9)(rh.inferiortemporal_2)(rh.precuneus_2)         |
| 0.00632 | 1.00E-05 | 0.81343 | 0.70673 | (Right-Thalamus-Proper)(rh.inferiorparietal_9)(rh.inferiortemporal_2)(rh.precuneus_2) |
| 0.00632 | 1.00E-05 | 0.81343 | 0.70673 | (Right-Accumbens-area)(Right-Thalamus-Proper)(rh.fusiform_7)(rh.superiortemporal_10)  |
| 0.00632 | 1.00E-05 | 0.81343 | 0.70673 | (rh.entorhinal_1)(rh.inferiorparietal_4)(rh.inferiorparietal_9)(rh.precuneus_2)       |
| 0.00632 | 1.00E-05 | 0.81343 | 0.70673 | (rh.inferiorparietal_9)(rh.inferiortemporal_2)(rh.isthmuscingulate_2)(rh.precuneus_2) |
| 0.00632 | 1.00E-05 | 0.81343 | 0.70673 | (Right-Accumbens-area)(rh.fusiform_7)(rh.insula_5)(rh.superiortemporal_10)            |

|         |          |         |         |                                                                                           |
|---------|----------|---------|---------|-------------------------------------------------------------------------------------------|
| 0.00632 | 1.00E-05 | 0.81343 | 0.70673 | (rh.inferiorparietal_9)(rh.inferiortemporal_2)(rh.insula_2)(rh.precuneus_2)               |
| 0.00632 | 1.00E-05 | 0.81343 | 0.70673 | (Right-Pallidum)(rh.inferiorparietal_9)(rh.inferiortemporal_2)(rh.precuneus_2)            |
| 0.00632 | 1.00E-05 | 0.81343 | 0.70673 | (rh.inferiorparietal_9)(rh.insula_5)(rh.lingual_7)(rh.precuneus_4)                        |
| 0.00632 | 1.00E-05 | 0.81343 | 0.70673 | (rh.inferiorparietal_9)(rh.inferiortemporal_2)(rh.precuneus_2)                            |
| 0.00632 | 1.00E-05 | 0.81343 | 0.70673 | (Right-Accumbens-area)(rh.fusiform_7)(rh.insula_2)(rh.superiortemporal_10)                |
| 0.00632 | 1.00E-05 | 0.81343 | 0.70673 | (Right-Accumbens-area)(rh.fusiform_7)(rh.isthmuscingulate_2)(rh.superiortemporal_10)      |
| 0.00636 | 1.00E-05 | 0.87313 | 0.77885 | (rh.bankssts_2)(rh.inferiorparietal_9)(rh.insula_5)(rh.superiortemporal_3)                |
| 0.00636 | 1.00E-05 | 0.87313 | 0.77885 | (rh.inferiorparietal_9)(rh.insula_5)(rh.lingual_7)(rh.superiortemporal_3)                 |
| 0.00636 | 1.00E-05 | 0.87313 | 0.77885 | (rh.fusiform_7)(rh.fusiform_8)(rh.parahippocampal_3)(rh.supramarginal_9)                  |
| 0.00636 | 1.00E-05 | 0.87313 | 0.77885 | (rh.fusiform_7)(rh.parahippocampal_3)(rh.precuneus_2)(rh.superiortemporal_1)              |
| 0.00638 | 1.00E-05 | 0.91418 | 0.83173 | (Right-Thalamus-Proper)(rh.bankssts_2)(rh.fusiform_7)(rh.parahippocampal_2)               |
| 0.00638 | 1.00E-05 | 0.91418 | 0.83173 | (Right-Putamen)(rh.bankssts_2)(rh.fusiform_7)(rh.parahippocampal_2)                       |
| 0.00638 | 1.00E-05 | 0.91418 | 0.83173 | (Right-Putamen)(rh.fusiform_7)(rh.lingual_7)(rh.parahippocampal_2)                        |
| 0.00638 | 1.00E-05 | 0.91418 | 0.83173 | (rh.bankssts_2)(rh.fusiform_7)(rh.parahippocampal_2)                                      |
| 0.00638 | 1.00E-05 | 0.91418 | 0.83173 | (Right-Thalamus-Proper)(rh.fusiform_7)(rh.lingual_7)(rh.parahippocampal_2)                |
| 0.00638 | 1.00E-05 | 0.91418 | 0.83173 | (rh.fusiform_7)(rh.isthmuscingulate_2)(rh.lingual_7)(rh.parahippocampal_2)                |
| 0.00638 | 1.00E-05 | 0.91418 | 0.83173 | (rh.fusiform_7)(rh.insula_2)(rh.lingual_7)(rh.parahippocampal_2)                          |
| 0.00638 | 1.00E-05 | 0.91418 | 0.83173 | (rh.bankssts_2)(rh.fusiform_7)(rh.insula_2)(rh.parahippocampal_2)                         |
| 0.00638 | 1.00E-05 | 0.91418 | 0.83173 | (rh.bankssts_2)(rh.fusiform_7)(rh.isthmuscingulate_2)(rh.parahippocampal_2)               |
| 0.00638 | 1.00E-05 | 0.91418 | 0.83173 | (Right-Caudate)(rh.bankssts_2)(rh.fusiform_7)(rh.lingual_7)                               |
| 0.00638 | 1.00E-05 | 0.91418 | 0.83173 | (rh.fusiform_7)(rh.lingual_7)(rh.parahippocampal_2)                                       |
| 0.00643 | 1.00E-05 | 0.87687 | 0.78365 | (rh.entorhinal_1)(rh.fusiform_7)(rh.isthmuscingulate_2)(rh.parahippocampal_3)             |
| 0.00643 | 1.00E-05 | 0.87687 | 0.78365 | (Right-Thalamus-Proper)(rh.entorhinal_1)(rh.fusiform_7)(rh.parahippocampal_3)             |
| 0.00643 | 1.00E-05 | 0.87687 | 0.78365 | (Right-Putamen)(rh.entorhinal_1)(rh.fusiform_7)(rh.parahippocampal_3)                     |
| 0.00643 | 1.00E-05 | 0.87687 | 0.78365 | (Right-Caudate)(rh.fusiform_7)(rh.fusiform_8)(rh.parahippocampal_3)                       |
| 0.00643 | 1.00E-05 | 0.87687 | 0.78365 | (rh.fusiform_7)(rh.fusiform_8)(rh.precuneus_2)(rh.supramarginal_9)                        |
| 0.00643 | 1.00E-05 | 0.87687 | 0.78365 | (rh.entorhinal_1)(rh.fusiform_7)(rh.parahippocampal_3)(rh.superiortemporal_9)             |
| 0.00643 | 1.00E-05 | 0.87687 | 0.78365 | (Right-Pallidum)(rh.entorhinal_1)(rh.fusiform_7)(rh.parahippocampal_3)                    |
| 0.00643 | 1.00E-05 | 0.87687 | 0.78365 | (rh.inferiorparietal_9)(rh.superiortemporal_1)(rh.superiortemporal_3)(rh.supramarginal_9) |
| 0.00643 | 1.00E-05 | 0.87687 | 0.78365 | (rh.entorhinal_1)(rh.fusiform_7)(rh.parahippocampal_3)                                    |
| 0.00643 | 1.00E-05 | 0.87687 | 0.78365 | (rh.entorhinal_1)(rh.fusiform_7)(rh.insula_2)(rh.parahippocampal_3)                       |
| 0.00643 | 1.00E-05 | 0.87687 | 0.78365 | (rh.bankssts_2)(rh.inferiorparietal_9)(rh.insula_5)(rh.lingual_7)                         |
| 0.00646 | 1.00E-05 | 0.91045 | 0.82692 | (Right-Putamen)(rh.bankssts_2)(rh.fusiform_7)(rh.supramarginal_9)                         |
| 0.00646 | 1.00E-05 | 0.91045 | 0.82692 | (rh.fusiform_7)(rh.isthmuscingulate_2)(rh.precuneus_2)(rh.superiortemporal_9)             |
| 0.00646 | 1.00E-05 | 0.91045 | 0.82692 | (Right-Putamen)(rh.fusiform_7)(rh.lingual_7)(rh.supramarginal_9)                          |

|         |          |         |         |                                                                                             |
|---------|----------|---------|---------|---------------------------------------------------------------------------------------------|
| 0.00646 | 1.00E-05 | 0.91045 | 0.82692 | (rh.inferiorparietal_9)(rh.insula_2)(rh.lingual_7)                                          |
| 0.00646 | 1.00E-05 | 0.91045 | 0.82692 | (Right-Thalamus-Proper)(rh.fusiform_7)(rh.precuneus_2)(rh.superiortemporal_9)               |
| 0.00646 | 1.00E-05 | 0.91045 | 0.82692 | (rh.fusiform_7)(rh.insula_2)(rh.parahippocampal_2)(rh.superiortemporal_3)                   |
| 0.00646 | 1.00E-05 | 0.91045 | 0.82692 | (Right-Thalamus-Proper)(rh.inferiorparietal_9)(rh.insula_2)(rh.lingual_7)                   |
| 0.00646 | 1.00E-05 | 0.91045 | 0.82692 | (Right-Putamen)(rh.fusiform_7)(rh.precuneus_2)(rh.superiortemporal_9)                       |
| 0.00646 | 1.00E-05 | 0.91045 | 0.82692 | (Right-Thalamus-Proper)(rh.fusiform_7)(rh.parahippocampal_2)(rh.superiortemporal_3)         |
| 0.00646 | 1.00E-05 | 0.91045 | 0.82692 | (rh.bankssts_2)(rh.inferiorparietal_9)(rh.insula_2)                                         |
| 0.00646 | 1.00E-05 | 0.91045 | 0.82692 | (Right-Thalamus-Proper)(rh.bankssts_2)(rh.inferiorparietal_9)(rh.insula_2)                  |
| 0.00646 | 1.00E-05 | 0.91045 | 0.82692 | (rh.fusiform_7)(rh.isthmuscingulate_2)(rh.parahippocampal_2)(rh.superiortemporal_3)         |
| 0.00646 | 1.00E-05 | 0.91045 | 0.82692 | (Right-Thalamus-Proper)(rh.bankssts_2)(rh.fusiform_7)(rh.supramarginal_9)                   |
| 0.00646 | 1.00E-05 | 0.91045 | 0.82692 | (rh.bankssts_2)(rh.fusiform_7)(rh.insula_2)(rh.supramarginal_9)                             |
| 0.00646 | 1.00E-05 | 0.91045 | 0.82692 | (rh.inferiorparietal_9)(rh.insula_2)(rh.isthmuscingulate_2)(rh.lingual_7)                   |
| 0.00646 | 1.00E-05 | 0.91045 | 0.82692 | (rh.fusiform_7)(rh.insula_2)(rh.lingual_7)(rh.supramarginal_9)                              |
| 0.00646 | 1.00E-05 | 0.91045 | 0.82692 | (Right-Caudate)(rh.bankssts_2)(rh.fusiform_7)(rh.superiortemporal_3)                        |
| 0.00646 | 1.00E-05 | 0.91045 | 0.82692 | (rh.fusiform_7)(rh.insula_2)(rh.precuneus_2)(rh.superiortemporal_9)                         |
| 0.00646 | 1.00E-05 | 0.91045 | 0.82692 | (Right-Caudate)(rh.fusiform_7)(rh.lingual_7)(rh.superiortemporal_3)                         |
| 0.00646 | 1.00E-05 | 0.91045 | 0.82692 | (rh.bankssts_2)(rh.fusiform_7)(rh.isthmuscingulate_2)(rh.supramarginal_9)                   |
| 0.00646 | 1.00E-05 | 0.91045 | 0.82692 | (Right-Putamen)(rh.inferiorparietal_9)(rh.insula_2)(rh.lingual_7)                           |
| 0.00646 | 1.00E-05 | 0.91045 | 0.82692 | (Right-Putamen)(rh.fusiform_7)(rh.parahippocampal_2)(rh.superiortemporal_3)                 |
| 0.00646 | 1.00E-05 | 0.91045 | 0.82692 | (rh.bankssts_2)(rh.inferiorparietal_9)(rh.insula_2)(rh.isthmuscingulate_2)                  |
| 0.00646 | 1.00E-05 | 0.91045 | 0.82692 | (rh.fusiform_7)(rh.parahippocampal_2)(rh.superiortemporal_3)                                |
| 0.00646 | 1.00E-05 | 0.91045 | 0.82692 | (Right-Pallidum)(rh.fusiform_7)(rh.precuneus_2)(rh.superiortemporal_9)                      |
| 0.00646 | 1.00E-05 | 0.91045 | 0.82692 | (rh.fusiform_7)(rh.isthmuscingulate_2)(rh.lingual_7)(rh.supramarginal_9)                    |
| 0.00646 | 1.00E-05 | 0.91045 | 0.82692 | (rh.fusiform_7)(rh.lingual_7)(rh.supramarginal_9)                                           |
| 0.00646 | 1.00E-05 | 0.91045 | 0.82692 | (Right-Thalamus-Proper)(rh.fusiform_7)(rh.lingual_7)(rh.supramarginal_9)                    |
| 0.00646 | 1.00E-05 | 0.91045 | 0.82692 | (Right-Putamen)(rh.bankssts_2)(rh.inferiorparietal_9)(rh.insula_2)                          |
| 0.00646 | 1.00E-05 | 0.91045 | 0.82692 | (rh.fusiform_7)(rh.precuneus_2)(rh.superiortemporal_9)                                      |
| 0.00646 | 1.00E-05 | 0.91045 | 0.82692 | (rh.bankssts_2)(rh.fusiform_7)(rh.supramarginal_9)                                          |
| 0.00649 | 1.00E-05 | 0.8806  | 0.78846 | (rh.fusiform_7)(rh.fusiform_8)(rh.parahippocampal_2)(rh.precuneus_2)                        |
| 0.00649 | 1.00E-05 | 0.8806  | 0.78846 | (rh.bankssts_2)(rh.entorhinal_1)(rh.fusiform_7)(rh.superiortemporal_3)                      |
| 0.00649 | 1.00E-05 | 0.8806  | 0.78846 | (Right-Caudate)(rh.fusiform_7)(rh.fusiform_8)(rh.precuneus_2)                               |
| 0.00649 | 1.00E-05 | 0.8806  | 0.78846 | (rh.inferiorparietal_4)(rh.inferiorparietal_9)(rh.parahippocampal_2)(rh.superiortemporal_9) |
| 0.00649 | 1.00E-05 | 0.8806  | 0.78846 | (rh.entorhinal_1)(rh.fusiform_7)(rh.lingual_7)(rh.superiortemporal_3)                       |
| 0.00652 | 1.00E-05 | 0.81716 | 0.71154 | (rh.fusiform_7)(rh.inferiorparietal_9)(rh.parahippocampal_2)(rh.superiortemporal_1)         |
| 0.00652 | 1.00E-05 | 0.81716 | 0.71154 | (rh.fusiform_7)(rh.inferiorparietal_9)(rh.insula_5)(rh.precuneus_3)                         |

|         |          |         |         |                                                                                     |
|---------|----------|---------|---------|-------------------------------------------------------------------------------------|
| 0.00652 | 1.00E-05 | 0.81716 | 0.71154 | (Right-Accumbens-area)(Right-Caudate)(rh.fusiform_7)(rh.superiortemporal_6)         |
| 0.00652 | 1.00E-05 | 0.81716 | 0.71154 | (rh.fusiform_7)(rh.fusiform_8)(rh.isthmuscingulate_1)(rh.precuneus_2)               |
| 0.00652 | 1.00E-05 | 0.81716 | 0.71154 | (rh.entorhinal_1)(rh.fusiform_7)(rh.precuneus_4)(rh.superiortemporal_3)             |
| 0.00652 | 1.00E-05 | 0.81716 | 0.71154 | (Right-Caudate)(rh.fusiform_7)(rh.inferiorparietal_9)(rh.superiortemporal_1)        |
| 0.00652 | 1.00E-05 | 0.81716 | 0.71154 | (rh.entorhinal_1)(rh.inferiorparietal_9)(rh.superiortemporal_3)(rh.supramarginal_9) |
| 0.00653 | 1.00E-05 | 0.90672 | 0.82212 | (rh.bankssts_2)(rh.inferiorparietal_9)(rh.isthmuscingulate_2)(rh.parahippocampal_2) |
| 0.00653 | 1.00E-05 | 0.90672 | 0.82212 | (Right-Thalamus-Proper)(rh.bankssts_2)(rh.inferiorparietal_9)(rh.parahippocampal_2) |
| 0.00653 | 1.00E-05 | 0.90672 | 0.82212 | (Right-Caudate)(rh.fusiform_7)(rh.lingual_7)(rh.parahippocampal_2)                  |
| 0.00653 | 1.00E-05 | 0.90672 | 0.82212 | (rh.inferiorparietal_9)(rh.isthmuscingulate_2)(rh.lingual_7)(rh.parahippocampal_2)  |
| 0.00653 | 1.00E-05 | 0.90672 | 0.82212 | (rh.fusiform_7)(rh.isthmuscingulate_2)(rh.superiortemporal_3)(rh.supramarginal_9)   |
| 0.00653 | 1.00E-05 | 0.90672 | 0.82212 | (rh.fusiform_7)(rh.superiortemporal_3)(rh.supramarginal_9)                          |
| 0.00653 | 1.00E-05 | 0.90672 | 0.82212 | (Right-Thalamus-Proper)(rh.fusiform_7)(rh.superiortemporal_3)(rh.supramarginal_9)   |
| 0.00653 | 1.00E-05 | 0.90672 | 0.82212 | (Right-Thalamus-Proper)(rh.inferiorparietal_9)(rh.lingual_7)(rh.parahippocampal_2)  |
| 0.00653 | 1.00E-05 | 0.90672 | 0.82212 | (rh.bankssts_2)(rh.inferiorparietal_9)(rh.parahippocampal_2)                        |
| 0.00653 | 1.00E-05 | 0.90672 | 0.82212 | (Right-Putamen)(rh.fusiform_7)(rh.superiortemporal_3)(rh.supramarginal_9)           |
| 0.00653 | 1.00E-05 | 0.90672 | 0.82212 | (Right-Putamen)(rh.bankssts_2)(rh.inferiorparietal_9)(rh.parahippocampal_2)         |
| 0.00653 | 1.00E-05 | 0.90672 | 0.82212 | (rh.fusiform_7)(rh.insula_2)(rh.superiortemporal_3)(rh.supramarginal_9)             |
| 0.00653 | 1.00E-05 | 0.90672 | 0.82212 | (Right-Caudate)(rh.bankssts_2)(rh.fusiform_7)(rh.parahippocampal_2)                 |
| 0.00653 | 1.00E-05 | 0.90672 | 0.82212 | (Right-Putamen)(rh.inferiorparietal_9)(rh.lingual_7)(rh.parahippocampal_2)          |
| 0.00654 | 1.00E-05 | 0.88433 | 0.79327 | (rh.fusiform_7)(rh.fusiform_8)(rh.parahippocampal_3)(rh.superiortemporal_9)         |
| 0.00654 | 1.00E-05 | 0.88433 | 0.79327 | (Right-Caudate)(rh.fusiform_7)(rh.parahippocampal_3)(rh.supramarginal_9)            |
| 0.00654 | 2.00E-05 | 0.88433 | 0.79327 | (rh.fusiform_7)(rh.fusiform_8)(rh.insula_5)(rh.parahippocampal_3)                   |
| 0.00654 | 2.00E-05 | 0.88433 | 0.79327 | (rh.inferiorparietal_10)(rh.inferiorparietal_9)(rh.precuneus_2)(rh.supramarginal_9) |
| 0.00654 | 2.00E-05 | 0.88433 | 0.79327 | (rh.bankssts_2)(rh.entorhinal_1)(rh.fusiform_7)(rh.lingual_7)                       |
| 0.00657 | 2.00E-05 | 0.90299 | 0.81731 | (rh.fusiform_7)(rh.inferiorparietal_10)(rh.isthmuscingulate_2)(rh.precuneus_2)      |
| 0.00657 | 2.00E-05 | 0.90299 | 0.81731 | (rh.bankssts_2)(rh.fusiform_7)(rh.insula_4)(rh.precuneus_2)                         |
| 0.00657 | 2.00E-05 | 0.90299 | 0.81731 | (Right-Putamen)(rh.fusiform_7)(rh.inferiorparietal_10)(rh.precuneus_2)              |
| 0.00657 | 2.00E-05 | 0.90299 | 0.81731 | (rh.fusiform_7)(rh.inferiorparietal_10)(rh.insula_2)(rh.precuneus_2)                |
| 0.00657 | 2.00E-05 | 0.90299 | 0.81731 | (rh.fusiform_7)(rh.inferiorparietal_10)(rh.precuneus_2)                             |
| 0.00657 | 2.00E-05 | 0.90299 | 0.81731 | (rh.fusiform_7)(rh.insula_4)(rh.insula_5)(rh.precuneus_2)                           |
| 0.00657 | 2.00E-05 | 0.90299 | 0.81731 | (Right-Thalamus-Proper)(rh.fusiform_7)(rh.inferiorparietal_10)(rh.precuneus_2)      |
| 0.00657 | 2.00E-05 | 0.90299 | 0.81731 | (Right-Thalamus-Proper)(rh.fusiform_7)(rh.inferiorparietal_4)(rh.precuneus_2)       |
| 0.00657 | 2.00E-05 | 0.90299 | 0.81731 | (rh.fusiform_7)(rh.inferiorparietal_4)(rh.precuneus_2)                              |
| 0.00657 | 2.00E-05 | 0.90299 | 0.81731 | (Right-Caudate)(rh.fusiform_7)(rh.lingual_7)(rh.supramarginal_9)                    |
| 0.00657 | 2.00E-05 | 0.90299 | 0.81731 | (rh.fusiform_7)(rh.inferiorparietal_4)(rh.insula_2)(rh.precuneus_2)                 |



|         |          |         |         |                                                                                     |
|---------|----------|---------|---------|-------------------------------------------------------------------------------------|
| 0.00657 | 2.00E-05 | 0.90299 | 0.81731 | (Right-Putamen)(rh.fusiform_7)(rh.inferiorparietal_4)(rh.precuneus_2)               |
| 0.00657 | 2.00E-05 | 0.90299 | 0.81731 | (rh.fusiform_7)(rh.inferiorparietal_4)(rh.isthmuscingulate_2)(rh.precuneus_2)       |
| 0.00657 | 2.00E-05 | 0.90299 | 0.81731 | (Right-Caudate)(rh.fusiform_7)(rh.parahippocampal_2)(rh.superiortemporal_3)         |
| 0.00657 | 2.00E-05 | 0.90299 | 0.81731 | (Right-Caudate)(rh.bankssts_2)(rh.fusiform_7)(rh.supramarginal_9)                   |
| 0.00657 | 2.00E-05 | 0.90299 | 0.81731 | (rh.fusiform_7)(rh.insula_4)(rh.lingual_7)(rh.precuneus_2)                          |
| 0.00657 | 2.00E-05 | 0.88806 | 0.79808 | (rh.fusiform_7)(rh.fusiform_8)(rh.insula_5)(rh.precuneus_2)                         |
| 0.00657 | 2.00E-05 | 0.88806 | 0.79808 | (Right-Caudate)(rh.inferiorparietal_9)(rh.parahippocampal_2)(rh.supramarginal_9)    |
| 0.00657 | 2.00E-05 | 0.88806 | 0.79808 | (Right-Caudate)(rh.inferiorparietal_9)(rh.precuneus_2)(rh.supramarginal_9)          |
| 0.00657 | 2.00E-05 | 0.88806 | 0.79808 | (rh.fusiform_7)(rh.inferiorparietal_4)(rh.parahippocampal_3)(rh.superiortemporal_3) |
| 0.00657 | 2.00E-05 | 0.88806 | 0.79808 | (rh.fusiform_7)(rh.precuneus_2)(rh.superiortemporal_1)(rh.supramarginal_9)          |
| 0.00657 | 2.00E-05 | 0.88806 | 0.79808 | (rh.fusiform_7)(rh.fusiform_8)(rh.precuneus_2)(rh.superiortemporal_9)               |
| 0.00657 | 2.00E-05 | 0.88806 | 0.79808 | (Right-Caudate)(rh.inferiorparietal_10)(rh.inferiorparietal_9)(rh.precuneus_2)      |
| 0.0066  | 2.00E-05 | 0.89925 | 0.8125  | (Right-Caudate)(rh.inferiorparietal_9)(rh.lingual_7)(rh.parahippocampal_2)          |
| 0.0066  | 2.00E-05 | 0.89925 | 0.8125  | (rh.fusiform_7)(rh.lingual_7)(rh.parahippocampal_3)(rh.superiortemporal_9)          |
| 0.0066  | 2.00E-05 | 0.89925 | 0.8125  | (Right-Caudate)(Right-Thalamus-Proper)(rh.inferiorparietal_9)(rh.precuneus_2)       |
| 0.0066  | 2.00E-05 | 0.89925 | 0.8125  | (rh.fusiform_7)(rh.lingual_7)(rh.parahippocampal_2)(rh.supramarginal_9)             |
| 0.0066  | 2.00E-05 | 0.89925 | 0.8125  | (Right-Pallidum)(rh.bankssts_2)(rh.inferiorparietal_9)(rh.precuneus_2)              |
| 0.0066  | 2.00E-05 | 0.89925 | 0.8125  | (rh.fusiform_7)(rh.parahippocampal_2)(rh.precuneus_2)(rh.superiortemporal_9)        |
| 0.0066  | 2.00E-05 | 0.89925 | 0.8125  | (Right-Caudate)(rh.inferiorparietal_9)(rh.isthmuscingulate_2)(rh.precuneus_2)       |
| 0.0066  | 2.00E-05 | 0.89925 | 0.8125  | (Right-Pallidum)(rh.inferiorparietal_9)(rh.lingual_7)(rh.superiortemporal_3)        |
| 0.0066  | 2.00E-05 | 0.89925 | 0.8125  | (rh.fusiform_7)(rh.insula_5)(rh.parahippocampal_3)                                  |
| 0.0066  | 2.00E-05 | 0.89925 | 0.8125  | (rh.bankssts_2)(rh.fusiform_7)(rh.parahippocampal_3)(rh.superiortemporal_9)         |
| 0.0066  | 2.00E-05 | 0.89925 | 0.8125  | (Right-Caudate)(Right-Putamen)(rh.inferiorparietal_9)(rh.precuneus_2)               |
| 0.0066  | 2.00E-05 | 0.89925 | 0.8125  | (Right-Pallidum)(rh.inferiorparietal_9)(rh.insula_2)(rh.superiortemporal_3)         |
| 0.0066  | 2.00E-05 | 0.89925 | 0.8125  | (rh.bankssts_2)(rh.fusiform_7)(rh.parahippocampal_2)(rh.supramarginal_9)            |
| 0.0066  | 2.00E-05 | 0.89925 | 0.8125  | (Right-Putamen)(rh.fusiform_7)(rh.insula_5)(rh.parahippocampal_3)                   |
| 0.0066  | 2.00E-05 | 0.89925 | 0.8125  | (Right-Thalamus-Proper)(rh.fusiform_7)(rh.insula_5)(rh.parahippocampal_3)           |
| 0.0066  | 2.00E-05 | 0.89925 | 0.8125  | (Right-Pallidum)(rh.fusiform_7)(rh.insula_5)(rh.parahippocampal_3)                  |
| 0.0066  | 2.00E-05 | 0.89925 | 0.8125  | (rh.fusiform_7)(rh.insula_2)(rh.insula_5)(rh.parahippocampal_3)                     |
| 0.0066  | 2.00E-05 | 0.89925 | 0.8125  | (Right-Caudate)(rh.inferiorparietal_9)(rh.precuneus_2)                              |
| 0.0066  | 2.00E-05 | 0.89925 | 0.8125  | (Right-Caudate)(rh.fusiform_7)(rh.superiortemporal_3)(rh.supramarginal_9)           |
| 0.0066  | 2.00E-05 | 0.89925 | 0.8125  | (Right-Caudate)(rh.bankssts_2)(rh.inferiorparietal_9)(rh.parahippocampal_2)         |
| 0.0066  | 2.00E-05 | 0.89925 | 0.8125  | (Right-Caudate)(rh.fusiform_7)(rh.insula_5)(rh.precuneus_2)                         |
| 0.0066  | 2.00E-05 | 0.89925 | 0.8125  | (Right-Pallidum)(rh.bankssts_2)(rh.inferiorparietal_9)(rh.superiortemporal_3)       |
| 0.0066  | 2.00E-05 | 0.89925 | 0.8125  | (rh.fusiform_7)(rh.insula_4)(rh.precuneus_2)(rh.superiortemporal_3)                 |

|        |          |         |         |                                                                                        |
|--------|----------|---------|---------|----------------------------------------------------------------------------------------|
| 0.0066 | 2.00E-05 | 0.89925 | 0.8125  | (rh.fusiform_7)(rh.insula_5)(rh.isthmuscingulate_2)(rh.parahippocampal_3)              |
| 0.0066 | 2.00E-05 | 0.89179 | 0.80288 | (rh.fusiform_7)(rh.inferiorparietal_4)(rh.lingual_7)(rh.parahippocampal_3)             |
| 0.0066 | 2.00E-05 | 0.89179 | 0.80288 | (rh.fusiform_7)(rh.parahippocampal_2)(rh.parahippocampal_3)(rh.superiortemporal_3)     |
| 0.0066 | 2.00E-05 | 0.89179 | 0.80288 | (Right-Pallidum)(rh.fusiform_7)(rh.parahippocampal_3)(rh.supramarginal_9)              |
| 0.0066 | 2.00E-05 | 0.89179 | 0.80288 | (rh.inferiorparietal_9)(rh.lingual_7)(rh.parahippocampal_2)(rh.supramarginal_9)        |
| 0.0066 | 2.00E-05 | 0.89179 | 0.80288 | (rh.fusiform_7)(rh.inferiorparietal_4)(rh.parahippocampal_2)(rh.precuneus_2)           |
| 0.0066 | 2.00E-05 | 0.89179 | 0.80288 | (Right-Putamen)(rh.fusiform_7)(rh.parahippocampal_3)(rh.supramarginal_9)               |
| 0.0066 | 2.00E-05 | 0.89179 | 0.80288 | (rh.fusiform_7)(rh.inferiorparietal_10)(rh.precuneus_2)(rh.supramarginal_9)            |
| 0.0066 | 2.00E-05 | 0.89179 | 0.80288 | (rh.bankssts_2)(rh.inferiorparietal_9)(rh.parahippocampal_2)(rh.supramarginal_9)       |
| 0.0066 | 2.00E-05 | 0.89179 | 0.80288 | (Right-Thalamus-Proper)(rh.fusiform_7)(rh.parahippocampal_3)(rh.supramarginal_9)       |
| 0.0066 | 2.00E-05 | 0.89179 | 0.80288 | (rh.bankssts_2)(rh.fusiform_7)(rh.inferiorparietal_4)(rh.parahippocampal_3)            |
| 0.0066 | 2.00E-05 | 0.89179 | 0.80288 | (rh.fusiform_7)(rh.precuneus_2)(rh.precuneus_3)(rh.superiortemporal_3)                 |
| 0.0066 | 2.00E-05 | 0.89179 | 0.80288 | (rh.fusiform_7)(rh.insula_2)(rh.parahippocampal_3)(rh.supramarginal_9)                 |
| 0.0066 | 2.00E-05 | 0.89179 | 0.80288 | (rh.fusiform_7)(rh.isthmuscingulate_2)(rh.parahippocampal_3)(rh.supramarginal_9)       |
| 0.0066 | 2.00E-05 | 0.89179 | 0.80288 | (rh.fusiform_7)(rh.parahippocampal_3)(rh.supramarginal_9)                              |
| 0.0066 | 2.00E-05 | 0.89179 | 0.80288 | (rh.fusiform_7)(rh.inferiorparietal_10)(rh.parahippocampal_2)(rh.precuneus_2)          |
| 0.0066 | 2.00E-05 | 0.89552 | 0.80769 | (Right-Caudate)(rh.fusiform_7)(rh.parahippocampal_3)                                   |
| 0.0066 | 2.00E-05 | 0.89552 | 0.80769 | (Right-Caudate)(rh.fusiform_7)(rh.inferiorparietal_10)(rh.precuneus_2)                 |
| 0.0066 | 2.00E-05 | 0.89552 | 0.80769 | (rh.fusiform_7)(rh.lingual_7)(rh.precuneus_2)(rh.precuneus_3)                          |
| 0.0066 | 2.00E-05 | 0.89552 | 0.80769 | (Right-Caudate)(Right-Thalamus-Proper)(rh.fusiform_7)(rh.parahippocampal_3)            |
| 0.0066 | 2.00E-05 | 0.89552 | 0.80769 | (rh.bankssts_2)(rh.inferiorparietal_9)(rh.insula_2)(rh.supramarginal_9)                |
| 0.0066 | 2.00E-05 | 0.89552 | 0.80769 | (Right-Caudate)(rh.fusiform_7)(rh.parahippocampal_2)(rh.supramarginal_9)               |
| 0.0066 | 2.00E-05 | 0.89552 | 0.80769 | (rh.inferiorparietal_9)(rh.isthmuscingulate_2)(rh.precuneus_2)(rh.supramarginal_9)     |
| 0.0066 | 2.00E-05 | 0.89552 | 0.80769 | (rh.fusiform_7)(rh.insula_5)(rh.precuneus_2)(rh.supramarginal_9)                       |
| 0.0066 | 2.00E-05 | 0.89552 | 0.80769 | (rh.inferiorparietal_10)(rh.inferiorparietal_9)(rh.isthmuscingulate_2)(rh.precuneus_2) |
| 0.0066 | 2.00E-05 | 0.89552 | 0.80769 | (Right-Putamen)(rh.inferiorparietal_9)(rh.precuneus_2)(rh.supramarginal_9)             |
| 0.0066 | 2.00E-05 | 0.89552 | 0.80769 | (Right-Caudate)(rh.fusiform_7)(rh.insula_2)(rh.parahippocampal_3)                      |
| 0.0066 | 2.00E-05 | 0.89552 | 0.80769 | (Right-Caudate)(Right-Pallidum)(rh.fusiform_7)(rh.parahippocampal_3)                   |
| 0.0066 | 2.00E-05 | 0.89552 | 0.80769 | (Right-Caudate)(rh.fusiform_7)(rh.isthmuscingulate_2)(rh.parahippocampal_3)            |
| 0.0066 | 2.00E-05 | 0.89552 | 0.80769 | (rh.bankssts_2)(rh.fusiform_7)(rh.parahippocampal_2)(rh.parahippocampal_3)             |
| 0.0066 | 2.00E-05 | 0.89552 | 0.80769 | (rh.fusiform_7)(rh.parahippocampal_3)(rh.superiortemporal_3)(rh.superiortemporal_9)    |
| 0.0066 | 2.00E-05 | 0.89552 | 0.80769 | (Right-Caudate)(Right-Putamen)(rh.fusiform_7)(rh.parahippocampal_3)                    |
| 0.0066 | 2.00E-05 | 0.89552 | 0.80769 | (rh.inferiorparietal_9)(rh.insula_2)(rh.lingual_7)(rh.supramarginal_9)                 |
| 0.0066 | 2.00E-05 | 0.89552 | 0.80769 | (Right-Putamen)(rh.inferiorparietal_10)(rh.inferiorparietal_9)(rh.precuneus_2)         |
| 0.0066 | 2.00E-05 | 0.89552 | 0.80769 | (rh.bankssts_2)(rh.fusiform_7)(rh.precuneus_2)(rh.precuneus_3)                         |

|         |          |         |         |                                                                                           |
|---------|----------|---------|---------|-------------------------------------------------------------------------------------------|
| 0.0066  | 2.00E-05 | 0.89552 | 0.80769 | (rh.fusiform_7)(rh.lingual_7)(rh.parahippocampal_2)(rh.parahippocampal_3)                 |
| 0.0066  | 2.00E-05 | 0.89552 | 0.80769 | (Right-Thalamus-Proper)(rh.inferiorparietal_10)(rh.inferiorparietal_9)(rh.precuneus_2)    |
| 0.0066  | 2.00E-05 | 0.89552 | 0.80769 | (rh.fusiform_7)(rh.parahippocampal_2)(rh.superiortemporal_3)(rh.supramarginal_9)          |
| 0.0066  | 2.00E-05 | 0.89552 | 0.80769 | (Right-Thalamus-Proper)(rh.inferiorparietal_9)(rh.precuneus_2)(rh.supramarginal_9)        |
| 0.00672 | 2.00E-05 | 0.8209  | 0.71635 | (Right-Accumbens-area)(Right-Thalamus-Proper)(rh.fusiform_7)(rh.superiortemporal_6)       |
| 0.00672 | 2.00E-05 | 0.8209  | 0.71635 | (Right-Accumbens-area)(rh.fusiform_7)(rh.insula_2)(rh.superiortemporal_6)                 |
| 0.00672 | 2.00E-05 | 0.8209  | 0.71635 | (Right-Accumbens-area)(Right-Pallidum)(rh.fusiform_7)(rh.superiortemporal_6)              |
| 0.00672 | 2.00E-05 | 0.8209  | 0.71635 | (rh.fusiform_7)(rh.fusiform_8)(rh.precuneus_4)(rh.supramarginal_9)                        |
| 0.00672 | 2.00E-05 | 0.8209  | 0.71635 | (rh.entorhinal_1)(rh.inferiorparietal_9)(rh.lingual_7)(rh.supramarginal_9)                |
| 0.00672 | 2.00E-05 | 0.8209  | 0.71635 | (rh.fusiform_7)(rh.inferiorparietal_9)(rh.precuneus_3)(rh.superiortemporal_9)             |
| 0.00672 | 2.00E-05 | 0.8209  | 0.71635 | (rh.bankssts_2)(rh.entorhinal_1)(rh.fusiform_7)(rh.precuneus_4)                           |
| 0.00672 | 2.00E-05 | 0.8209  | 0.71635 | (Right-Accumbens-area)(Right-Putamen)(rh.fusiform_7)(rh.superiortemporal_6)               |
| 0.00672 | 2.00E-05 | 0.8209  | 0.71635 | (rh.bankssts_2)(rh.entorhinal_1)(rh.inferiorparietal_9)(rh.supramarginal_9)               |
| 0.00672 | 2.00E-05 | 0.8209  | 0.71635 | (rh.entorhinal_1)(rh.inferiorparietal_9)(rh.parahippocampal_2)(rh.parahippocampal_3)      |
| 0.00672 | 2.00E-05 | 0.8209  | 0.71635 | (Right-Accumbens-area)(rh.fusiform_7)(rh.isthmuscingulate_2)(rh.superiortemporal_6)       |
| 0.00692 | 2.00E-05 | 0.82463 | 0.72115 | (rh.fusiform_7)(rh.inferiorparietal_9)(rh.superiortemporal_1)                             |
| 0.00692 | 2.00E-05 | 0.82463 | 0.72115 | (rh.inferiorparietal_9)(rh.precuneus_2)(rh.superiortemporal_3)(rh.superiortemporal_6)     |
| 0.00692 | 2.00E-05 | 0.82463 | 0.72115 | (rh.fusiform_7)(rh.inferiorparietal_9)(rh.isthmuscingulate_2)(rh.superiortemporal_1)      |
| 0.00692 | 2.00E-05 | 0.82463 | 0.72115 | (Right-Thalamus-Proper)(rh.fusiform_7)(rh.precuneus_4)(rh.precuneus_7)                    |
| 0.00692 | 2.00E-05 | 0.82463 | 0.72115 | (rh.fusiform_7)(rh.isthmuscingulate_2)(rh.precuneus_4)(rh.precuneus_7)                    |
| 0.00692 | 2.00E-05 | 0.82463 | 0.72115 | (Right-Putamen)(rh.fusiform_7)(rh.precuneus_4)(rh.precuneus_7)                            |
| 0.00692 | 2.00E-05 | 0.82463 | 0.72115 | (rh.fusiform_7)(rh.insula_2)(rh.precuneus_4)(rh.precuneus_7)                              |
| 0.00692 | 2.00E-05 | 0.82463 | 0.72115 | (rh.entorhinal_1)(rh.inferiorparietal_9)(rh.parahippocampal_2)(rh.superiortemporal_3)     |
| 0.00692 | 2.00E-05 | 0.82463 | 0.72115 | (rh.fusiform_7)(rh.inferiorparietal_9)(rh.insula_2)(rh.superiortemporal_1)                |
| 0.00692 | 2.00E-05 | 0.82463 | 0.72115 | (Right-Putamen)(rh.fusiform_7)(rh.inferiorparietal_9)(rh.superiortemporal_1)              |
| 0.00692 | 2.00E-05 | 0.82463 | 0.72115 | (Right-Thalamus-Proper)(rh.fusiform_7)(rh.inferiorparietal_9)(rh.superiortemporal_1)      |
| 0.00712 | 2.00E-05 | 0.82836 | 0.72596 | (Right-Putamen)(rh.entorhinal_1)(rh.inferiorparietal_9)(rh.parahippocampal_3)             |
| 0.00712 | 2.00E-05 | 0.82836 | 0.72596 | (rh.inferiorparietal_9)(rh.isthmuscingulate_1)(rh.superiortemporal_3)(rh.supramarginal_9) |
| 0.00712 | 2.00E-05 | 0.82836 | 0.72596 | (rh.entorhinal_1)(rh.inferiorparietal_9)(rh.parahippocampal_3)(rh.superiortemporal_9)     |
| 0.00712 | 2.00E-05 | 0.82836 | 0.72596 | (rh.fusiform_7)(rh.isthmuscingulate_1)(rh.precuneus_2)(rh.superiortemporal_1)             |
| 0.00712 | 2.00E-05 | 0.82836 | 0.72596 | (rh.entorhinal_1)(rh.inferiorparietal_9)(rh.parahippocampal_3)                            |
| 0.00712 | 2.00E-05 | 0.82836 | 0.72596 | (rh.fusiform_7)(rh.inferiorparietal_4)(rh.inferiorparietal_9)(rh.superiortemporal_9)      |
| 0.00712 | 2.00E-05 | 0.82836 | 0.72596 | (rh.entorhinal_1)(rh.inferiorparietal_9)(rh.lingual_7)(rh.parahippocampal_2)              |
| 0.00712 | 2.00E-05 | 0.82836 | 0.72596 | (rh.inferiorparietal_9)(rh.parahippocampal_2)(rh.precuneus_4)(rh.supramarginal_9)         |
| 0.00712 | 2.00E-05 | 0.82836 | 0.72596 | (rh.fusiform_8)(rh.inferiorparietal_9)(rh.parahippocampal_2)(rh.parahippocampal_3)        |

|         |          |         |         |                                                                                             |
|---------|----------|---------|---------|---------------------------------------------------------------------------------------------|
| 0.00712 | 2.00E-05 | 0.82836 | 0.72596 | (rh.entorhinal_1)(rh.inferiorparietal_9)(rh.isthmuscingulate_2)(rh.parahippocampal_3)       |
| 0.00712 | 2.00E-05 | 0.82836 | 0.72596 | (rh.bankssts_2)(rh.entorhinal_1)(rh.inferiorparietal_9)(rh.parahippocampal_2)               |
| 0.00712 | 2.00E-05 | 0.82836 | 0.72596 | (rh.inferiorparietal_9)(rh.isthmuscingulate_1)(rh.parahippocampal_2)(rh.superiortemporal_3) |
| 0.00712 | 2.00E-05 | 0.82836 | 0.72596 | (rh.entorhinal_1)(rh.inferiorparietal_9)(rh.insula_2)(rh.parahippocampal_3)                 |
| 0.00712 | 2.00E-05 | 0.82836 | 0.72596 | (Right-Pallidum)(rh.entorhinal_1)(rh.inferiorparietal_9)(rh.parahippocampal_3)              |
| 0.00712 | 2.00E-05 | 0.82836 | 0.72596 | (rh.fusiform_7)(rh.fusiform_8)(rh.precuneus_4)(rh.superiortemporal_3)                       |
| 0.00712 | 2.00E-05 | 0.82836 | 0.72596 | (Right-Thalamus-Proper)(rh.entorhinal_1)(rh.inferiorparietal_9)(rh.parahippocampal_3)       |
| 0.00716 | 2.00E-05 | 0.98134 | 0.93269 | (rh.bankssts_2)(rh.lingual_7)(rh.parahippocampal_2)(rh.superiortemporal_3)                  |
| 0.00732 | 2.00E-05 | 0.83209 | 0.73077 | (Right-Thalamus-Proper)(rh.entorhinal_1)(rh.inferiorparietal_9)(rh.superiortemporal_3)      |
| 0.00732 | 2.00E-05 | 0.83209 | 0.73077 | (rh.bankssts_2)(rh.fusiform_7)(rh.fusiform_8)(rh.precuneus_4)                               |
| 0.00732 | 2.00E-05 | 0.83209 | 0.73077 | (rh.entorhinal_1)(rh.inferiorparietal_9)(rh.insula_2)(rh.superiortemporal_3)                |
| 0.00732 | 2.00E-05 | 0.83209 | 0.73077 | (rh.inferiorparietal_9)(rh.insula_2)(rh.isthmuscingulate_1)(rh.precuneus_2)                 |
| 0.00732 | 2.00E-05 | 0.83209 | 0.73077 | (rh.inferiorparietal_9)(rh.insula_2)(rh.precuneus_4)(rh.supramarginal_9)                    |
| 0.00732 | 2.00E-05 | 0.83209 | 0.73077 | (rh.entorhinal_1)(rh.inferiorparietal_9)(rh.superiortemporal_3)                             |
| 0.00732 | 2.00E-05 | 0.83209 | 0.73077 | (rh.entorhinal_1)(rh.inferiorparietal_9)(rh.superiortemporal_3)(rh.superiortemporal_9)      |
| 0.00732 | 2.00E-05 | 0.83209 | 0.73077 | (Right-Putamen)(rh.entorhinal_1)(rh.inferiorparietal_9)(rh.superiortemporal_3)              |
| 0.00732 | 2.00E-05 | 0.83209 | 0.73077 | (Right-Accumbens-area)(rh.entorhinal_1)(rh.fusiform_7)(rh.superiortemporal_3)               |
| 0.00732 | 2.00E-05 | 0.83209 | 0.73077 | (Right-Pallidum)(rh.entorhinal_1)(rh.inferiorparietal_9)(rh.superiortemporal_3)             |
| 0.00732 | 2.00E-05 | 0.83209 | 0.73077 | (rh.entorhinal_1)(rh.inferiorparietal_9)(rh.isthmuscingulate_2)(rh.superiortemporal_3)      |
| 0.00752 | 2.00E-05 | 0.83582 | 0.73558 | (rh.fusiform_8)(rh.inferiorparietal_9)(rh.parahippocampal_3)                                |
| 0.00752 | 2.00E-05 | 0.83582 | 0.73558 | (Right-Putamen)(rh.entorhinal_1)(rh.inferiorparietal_9)(rh.lingual_7)                       |
| 0.00752 | 2.00E-05 | 0.83582 | 0.73558 | (Right-Pallidum)(rh.bankssts_2)(rh.entorhinal_1)(rh.inferiorparietal_9)                     |
| 0.00752 | 2.00E-05 | 0.83582 | 0.73558 | (rh.fusiform_8)(rh.inferiorparietal_9)(rh.isthmuscingulate_2)(rh.parahippocampal_3)         |
| 0.00752 | 2.00E-05 | 0.83582 | 0.73558 | (Right-Thalamus-Proper)(rh.entorhinal_1)(rh.inferiorparietal_9)(rh.lingual_7)               |
| 0.00752 | 2.00E-05 | 0.83582 | 0.73558 | (Right-Accumbens-area)(rh.fusiform_7)(rh.fusiform_8)(rh.parahippocampal_3)                  |
| 0.00752 | 2.00E-05 | 0.83582 | 0.73558 | (rh.fusiform_8)(rh.inferiorparietal_9)(rh.insula_2)(rh.parahippocampal_3)                   |
| 0.00752 | 2.00E-05 | 0.83582 | 0.73558 | (rh.fusiform_7)(rh.insula_5)(rh.isthmuscingulate_1)(rh.precuneus_2)                         |
| 0.00752 | 2.00E-05 | 0.83582 | 0.73558 | (rh.bankssts_2)(rh.entorhinal_1)(rh.inferiorparietal_9)                                     |
| 0.00752 | 2.00E-05 | 0.83582 | 0.73558 | (rh.entorhinal_1)(rh.inferiorparietal_9)(rh.lingual_7)(rh.superiortemporal_9)               |
| 0.00752 | 2.00E-05 | 0.83582 | 0.73558 | (Right-Accumbens-area)(rh.fusiform_7)(rh.parahippocampal_3)(rh.supramarginal_9)             |
| 0.00752 | 2.00E-05 | 0.83582 | 0.73558 | (rh.inferiorparietal_9)(rh.isthmuscingulate_1)(rh.lingual_7)(rh.superiortemporal_3)         |
| 0.00752 | 2.00E-05 | 0.83582 | 0.73558 | (Right-Pallidum)(rh.fusiform_8)(rh.inferiorparietal_9)(rh.parahippocampal_3)                |
| 0.00752 | 2.00E-05 | 0.83582 | 0.73558 | (rh.bankssts_2)(rh.entorhinal_1)(rh.inferiorparietal_9)(rh.isthmuscingulate_2)              |
| 0.00752 | 2.00E-05 | 0.83582 | 0.73558 | (rh.bankssts_2)(rh.entorhinal_1)(rh.inferiorparietal_9)(rh.insula_2)                        |
| 0.00752 | 2.00E-05 | 0.83582 | 0.73558 | (rh.bankssts_2)(rh.entorhinal_1)(rh.inferiorparietal_9)(rh.superiortemporal_9)              |

|         |          |         |         |                                                                                          |
|---------|----------|---------|---------|------------------------------------------------------------------------------------------|
| 0.00752 | 2.00E-05 | 0.83582 | 0.73558 | (Right-Pallidum)(rh.entorhinal_1)(rh.inferiorparietal_9)(rh.lingual_7)                   |
| 0.00752 | 2.00E-05 | 0.83582 | 0.73558 | (Right-Accumbens-area)(rh.bankssts_2)(rh.entorhinal_1)(rh.fusiform_7)                    |
| 0.00752 | 2.00E-05 | 0.83582 | 0.73558 | (Right-Thalamus-Proper)(rh.bankssts_2)(rh.entorhinal_1)(rh.inferiorparietal_9)           |
| 0.00752 | 2.00E-05 | 0.83582 | 0.73558 | (Right-Putamen)(rh.fusiform_8)(rh.inferiorparietal_9)(rh.parahippocampal_3)              |
| 0.00752 | 2.00E-05 | 0.83582 | 0.73558 | (rh.fusiform_8)(rh.inferiorparietal_9)(rh.parahippocampal_3)(rh.superiortemporal_9)      |
| 0.00752 | 2.00E-05 | 0.83582 | 0.73558 | (rh.entorhinal_1)(rh.inferiorparietal_9)(rh.lingual_7)                                   |
| 0.00752 | 2.00E-05 | 0.83582 | 0.73558 | (Right-Thalamus-Proper)(rh.fusiform_8)(rh.inferiorparietal_9)(rh.parahippocampal_3)      |
| 0.00752 | 2.00E-05 | 0.83582 | 0.73558 | (rh.entorhinal_1)(rh.inferiorparietal_9)(rh.insula_2)(rh.lingual_7)                      |
| 0.00752 | 2.00E-05 | 0.83582 | 0.73558 | (Right-Caudate)(rh.inferiorparietal_9)(rh.parahippocampal_2)(rh.precuneus_4)             |
| 0.00752 | 2.00E-05 | 0.83582 | 0.73558 | (rh.bankssts_2)(rh.inferiorparietal_9)(rh.isthmuscingulate_1)(rh.superiortemporal_3)     |
| 0.00752 | 2.00E-05 | 0.83582 | 0.73558 | (rh.entorhinal_1)(rh.inferiorparietal_9)(rh.isthmuscingulate_2)(rh.lingual_7)            |
| 0.00752 | 2.00E-05 | 0.83582 | 0.73558 | (rh.fusiform_7)(rh.precuneus_4)(rh.superiortemporal_1)(rh.supramarginal_9)               |
| 0.00752 | 2.00E-05 | 0.83582 | 0.73558 | (Right-Putamen)(rh.bankssts_2)(rh.entorhinal_1)(rh.inferiorparietal_9)                   |
| 0.00758 | 2.00E-05 | 0.98881 | 0.94712 | (rh.bankssts_2)(rh.insula_2)(rh.lingual_7)(rh.precuneus_2)                               |
| 0.00772 | 2.00E-05 | 0.83955 | 0.74038 | (rh.fusiform_8)(rh.inferiorparietal_9)(rh.precuneus_2)(rh.superiortemporal_9)            |
| 0.00772 | 2.00E-05 | 0.83955 | 0.74038 | (Right-Pallidum)(rh.fusiform_8)(rh.inferiorparietal_9)(rh.precuneus_2)                   |
| 0.00772 | 2.00E-05 | 0.83955 | 0.74038 | (rh.fusiform_7)(rh.insula_5)(rh.precuneus_4)(rh.supramarginal_9)                         |
| 0.00772 | 2.00E-05 | 0.83955 | 0.74038 | (Right-Putamen)(rh.fusiform_8)(rh.inferiorparietal_9)(rh.precuneus_2)                    |
| 0.00772 | 2.00E-05 | 0.83955 | 0.74038 | (rh.inferiorparietal_9)(rh.lingual_7)(rh.parahippocampal_2)(rh.precuneus_4)              |
| 0.00772 | 2.00E-05 | 0.83955 | 0.74038 | (rh.fusiform_8)(rh.inferiorparietal_9)(rh.isthmuscingulate_2)(rh.precuneus_2)            |
| 0.00772 | 2.00E-05 | 0.83955 | 0.74038 | (Right-Thalamus-Proper)(rh.fusiform_8)(rh.inferiorparietal_9)(rh.precuneus_2)            |
| 0.00772 | 2.00E-05 | 0.83955 | 0.74038 | (Right-Accumbens-area)(rh.fusiform_7)(rh.superiortemporal_3)(rh.supramarginal_9)         |
| 0.00772 | 2.00E-05 | 0.83955 | 0.74038 | (rh.bankssts_2)(rh.inferiorparietal_9)(rh.parahippocampal_2)(rh.precuneus_4)             |
| 0.00772 | 2.00E-05 | 0.83955 | 0.74038 | (Right-Accumbens-area)(rh.fusiform_7)(rh.fusiform_8)(rh.superiortemporal_3)              |
| 0.00772 | 2.00E-05 | 0.83955 | 0.74038 | (rh.fusiform_8)(rh.inferiorparietal_9)(rh.insula_2)(rh.precuneus_2)                      |
| 0.00772 | 2.00E-05 | 0.83955 | 0.74038 | (rh.fusiform_7)(rh.insula_4)(rh.precuneus_2)(rh.precuneus_4)                             |
| 0.00772 | 2.00E-05 | 0.83955 | 0.74038 | (rh.fusiform_7)(rh.isthmuscingulate_1)(rh.superiortemporal_3)(rh.supramarginal_9)        |
| 0.00772 | 2.00E-05 | 0.83955 | 0.74038 | (rh.fusiform_8)(rh.inferiorparietal_9)(rh.precuneus_2)                                   |
| 0.00772 | 2.00E-05 | 0.83955 | 0.74038 | (rh.fusiform_7)(rh.isthmuscingulate_1)(rh.precuneus_2)(rh.superiortemporal_9)            |
| 0.00791 | 2.00E-05 | 0.84328 | 0.74519 | (Right-Accumbens-area)(Right-Caudate)(rh.fusiform_7)(rh.supramarginal_9)                 |
| 0.00791 | 2.00E-05 | 0.84328 | 0.74519 | (rh.inferiorparietal_9)(rh.insula_2)(rh.lingual_7)(rh.precuneus_4)                       |
| 0.00791 | 2.00E-05 | 0.84328 | 0.74519 | (Right-Accumbens-area)(Right-Caudate)(rh.fusiform_7)(rh.parahippocampal_3)               |
| 0.00791 | 2.00E-05 | 0.84328 | 0.74519 | (Right-Accumbens-area)(rh.bankssts_2)(rh.fusiform_7)(rh.supramarginal_9)                 |
| 0.00791 | 2.00E-05 | 0.84328 | 0.74519 | (Right-Accumbens-area)(rh.bankssts_2)(rh.fusiform_7)(rh.fusiform_8)                      |
| 0.00791 | 2.00E-05 | 0.84328 | 0.74519 | (rh.inferiorparietal_9)(rh.parahippocampal_3)(rh.superiortemporal_3)(rh.supramarginal_9) |

|         |          |         |         |                                                                                     |
|---------|----------|---------|---------|-------------------------------------------------------------------------------------|
| 0.00791 | 2.00E-05 | 0.84328 | 0.74519 | (rh.bankssts_2)(rh.inferiorparietal_9)(rh.insula_2)(rh.precuneus_4)                 |
| 0.00791 | 2.00E-05 | 0.84328 | 0.74519 | (rh.fusiform_7)(rh.parahippocampal_3)(rh.precuneus_2)(rh.precuneus_7)               |
| 0.00791 | 2.00E-05 | 0.84328 | 0.74519 | (rh.fusiform_7)(rh.inferiorparietal_10)(rh.precuneus_4)(rh.superiortemporal_3)      |
| 0.00791 | 2.00E-05 | 0.84328 | 0.74519 | (rh.bankssts_2)(rh.fusiform_7)(rh.isthmuscingulate_1)(rh.supramarginal_9)           |
| 0.00805 | 2.00E-05 | 0.80224 | 0.69712 | (rh.inferiorparietal_10)(rh.inferiorparietal_9)(rh.insula_5)(rh.precuneus_4)        |
| 0.0081  | 2.00E-05 | 0.84701 | 0.75    | (rh.bankssts_2)(rh.fusiform_7)(rh.isthmuscingulate_1)(rh.superiortemporal_3)        |
| 0.0081  | 2.00E-05 | 0.84701 | 0.75    | (rh.fusiform_7)(rh.isthmuscingulate_1)(rh.lingual_7)(rh.superiortemporal_3)         |
| 0.0081  | 2.00E-05 | 0.84701 | 0.75    | (rh.fusiform_7)(rh.inferiortemporal_2)(rh.parahippocampal_3)(rh.superiortemporal_3) |
| 0.0081  | 2.00E-05 | 0.84701 | 0.75    | (rh.inferiorparietal_9)(rh.insula_4)(rh.insula_5)(rh.parahippocampal_3)             |
| 0.0081  | 2.00E-05 | 0.84701 | 0.75    | (rh.inferiorparietal_4)(rh.inferiorparietal_9)(rh.parahippocampal_3)                |
| 0.0081  | 2.00E-05 | 0.84701 | 0.75    | (Right-Accumbens-area)(Right-Caudate)(rh.fusiform_7)(rh.superiortemporal_3)         |
| 0.0081  | 2.00E-05 | 0.84701 | 0.75    | (Right-Accumbens-area)(Right-Putamen)(rh.fusiform_7)(rh.parahippocampal_3)          |
| 0.0081  | 2.00E-05 | 0.84701 | 0.75    | (rh.inferiorparietal_9)(rh.lingual_7)(rh.parahippocampal_3)(rh.supramarginal_9)     |
| 0.0081  | 2.00E-05 | 0.84701 | 0.75    | (Right-Accumbens-area)(Right-Pallidum)(rh.fusiform_7)(rh.parahippocampal_3)         |
| 0.0081  | 2.00E-05 | 0.84701 | 0.75    | (Right-Accumbens-area)(Right-Thalamus-Proper)(rh.fusiform_7)(rh.parahippocampal_3)  |
| 0.0081  | 2.00E-05 | 0.84701 | 0.75    | (rh.bankssts_2)(rh.inferiorparietal_9)(rh.parahippocampal_3)(rh.supramarginal_9)    |
| 0.0081  | 2.00E-05 | 0.84701 | 0.75    | (Right-Pallidum)(rh.fusiform_7)(rh.parahippocampal_2)(rh.precuneus_4)               |
| 0.0081  | 2.00E-05 | 0.84701 | 0.75    | (rh.inferiorparietal_9)(rh.middletemporal_4)(rh.supramarginal_9)                    |
| 0.0081  | 2.00E-05 | 0.84701 | 0.75    | (Right-Accumbens-area)(rh.fusiform_7)(rh.insula_2)(rh.parahippocampal_3)            |
| 0.0081  | 2.00E-05 | 0.84701 | 0.75    | (Right-Caudate)(rh.inferiorparietal_9)(rh.parahippocampal_3)(rh.superiortemporal_3) |
| 0.0081  | 2.00E-05 | 0.84701 | 0.75    | (rh.inferiorparietal_9)(rh.insula_5)(rh.parahippocampal_2)(rh.parahippocampal_3)    |
| 0.0081  | 2.00E-05 | 0.84701 | 0.75    | (Right-Caudate)(rh.inferiorparietal_9)(rh.parahippocampal_2)(rh.parahippocampal_3)  |
| 0.0081  | 2.00E-05 | 0.84701 | 0.75    | (Right-Accumbens-area)(rh.fusiform_7)(rh.isthmuscingulate_2)(rh.parahippocampal_3)  |
| 0.0081  | 2.00E-05 | 0.84701 | 0.75    | (rh.fusiform_7)(rh.fusiform_8)(rh.superiortemporal_6)(rh.supramarginal_9)           |
| 0.0081  | 2.00E-05 | 0.84701 | 0.75    | (rh.fusiform_7)(rh.insula_5)(rh.precuneus_4)(rh.superiortemporal_3)                 |
| 0.0081  | 2.00E-05 | 0.84701 | 0.75    | (rh.bankssts_2)(rh.fusiform_7)(rh.inferiorparietal_10)(rh.precuneus_4)              |
| 0.0081  | 2.00E-05 | 0.84701 | 0.75    | (Right-Caudate)(rh.fusiform_7)(rh.precuneus_2)(rh.superiortemporal_10)              |
| 0.00828 | 2.00E-05 | 0.85075 | 0.75481 | (rh.bankssts_2)(rh.fusiform_7)(rh.insula_5)(rh.precuneus_4)                         |
| 0.00828 | 2.00E-05 | 0.85075 | 0.75481 | (Right-Caudate)(Right-Pallidum)(rh.fusiform_7)(rh.precuneus_4)                      |
| 0.00828 | 2.00E-05 | 0.85075 | 0.75481 | (Right-Accumbens-area)(rh.fusiform_7)(rh.superiortemporal_3)                        |
| 0.00828 | 2.00E-05 | 0.85075 | 0.75481 | (Right-Accumbens-area)(Right-Thalamus-Proper)(rh.fusiform_7)(rh.superiortemporal_3) |
| 0.00828 | 2.00E-05 | 0.85075 | 0.75481 | (rh.fusiform_7)(rh.insula_5)(rh.lingual_7)(rh.precuneus_4)                          |
| 0.00828 | 2.00E-05 | 0.85075 | 0.75481 | (Right-Accumbens-area)(Right-Caudate)(rh.bankssts_2)(rh.fusiform_7)                 |
| 0.00828 | 2.00E-05 | 0.85075 | 0.75481 | (Right-Accumbens-area)(rh.fusiform_7)(rh.isthmuscingulate_2)(rh.superiortemporal_3) |
| 0.00828 | 2.00E-05 | 0.85075 | 0.75481 | (Right-Accumbens-area)(Right-Pallidum)(rh.fusiform_7)(rh.superiortemporal_3)        |

|         |          |         |         |                                                                                        |
|---------|----------|---------|---------|----------------------------------------------------------------------------------------|
| 0.00828 | 2.00E-05 | 0.85075 | 0.75481 | (Right-Accumbens-area)(Right-Putamen)(rh.fusiform_7)(rh.superiortemporal_3)            |
| 0.00828 | 2.00E-05 | 0.85075 | 0.75481 | (Right-Caudate)(rh.bankssts_2)(rh.inferiorparietal_9)(rh.parahippocampal_3)            |
| 0.00828 | 2.00E-05 | 0.85075 | 0.75481 | (rh.inferiorparietal_9)(rh.parahippocampal_3)(rh.superiortemporal_3)(rh.superiortempor |
| 0.00828 | 2.00E-05 | 0.85075 | 0.75481 | (Right-Caudate)(rh.inferiorparietal_9)(rh.lingual_7)(rh.parahippocampal_3)             |
| 0.00828 | 2.00E-05 | 0.85075 | 0.75481 | (Right-Accumbens-area)(rh.fusiform_7)(rh.insula_2)(rh.superiortemporal_3)              |
| 0.00828 | 2.00E-05 | 0.85075 | 0.75481 | (rh.bankssts_1)(rh.inferiorparietal_9)(rh.insula_2)(rh.superiortemporal_3)             |
| 0.00828 | 2.00E-05 | 0.85075 | 0.75481 | (rh.fusiform_7)(rh.inferiortemporal_2)(rh.parahippocampal_2)(rh.precuneus_2)           |
| 0.00828 | 2.00E-05 | 0.85075 | 0.75481 | (rh.fusiform_7)(rh.inferiortemporal_2)(rh.lingual_7)(rh.parahippocampal_3)             |
| 0.00828 | 2.00E-05 | 0.85075 | 0.75481 | (rh.bankssts_2)(rh.fusiform_7)(rh.inferiortemporal_2)(rh.parahippocampal_3)            |
| 0.00828 | 2.00E-05 | 0.85075 | 0.75481 | (rh.bankssts_2)(rh.fusiform_7)(rh.isthmuscingulate_1)(rh.lingual_7)                    |
| 0.00828 | 2.00E-05 | 0.85075 | 0.75481 | (rh.fusiform_7)(rh.parahippocampal_2)(rh.precuneus_2)(rh.precuneus_7)                  |
| 0.00828 | 2.00E-05 | 0.85075 | 0.75481 | (rh.fusiform_7)(rh.parahippocampal_3)(rh.superiortemporal_6)(rh.supramarginal_9)       |
| 0.00828 | 2.00E-05 | 0.85075 | 0.75481 | (rh.fusiform_7)(rh.precuneus_2)(rh.precuneus_7)(rh.supramarginal_9)                    |
| 0.00828 | 2.00E-05 | 0.85075 | 0.75481 | (rh.fusiform_7)(rh.insula_4)(rh.precuneus_2)(rh.superiortemporal_10)                   |
| 0.00828 | 2.00E-05 | 0.85075 | 0.75481 | (rh.bankssts_1)(rh.inferiorparietal_9)(rh.insula_2)(rh.precuneus_2)                    |
| 0.00833 | 2.00E-05 | 0.88433 | 0.7963  | (rh.inferiorparietal_4)(rh.inferiorparietal_9)(rh.parahippocampal_2)                   |
| 0.00833 | 2.00E-05 | 0.88433 | 0.7963  | (rh.inferiorparietal_9)(rh.lingual_7)(rh.superiortemporal_1)                           |
| 0.00833 | 2.00E-05 | 0.88433 | 0.7963  | (Right-Pallidum)(rh.inferiorparietal_4)(rh.inferiorparietal_9)(rh.lingual_7)           |
| 0.00833 | 2.00E-05 | 0.80597 | 0.70192 | (rh.fusiform_7)(rh.fusiform_8)(rh.inferiorparietal_4)(rh.inferiorparietal_9)           |
| 0.00834 | 2.00E-05 | 0.86194 | 0.76852 | (rh.inferiorparietal_9)(rh.insula_5)(rh.supramarginal_9)                               |
| 0.00834 | 2.00E-05 | 0.86194 | 0.76852 | (rh.inferiorparietal_9)(rh.middletemporal_4)                                           |
| 0.00839 | 2.00E-05 | 0.87687 | 0.78704 | (rh.inferiorparietal_9)(rh.insula_5)                                                   |
| 0.00839 | 2.00E-05 | 0.87687 | 0.78704 | (rh.inferiorparietal_9)(rh.parahippocampal_2)(rh.superiortemporal_1)                   |
| 0.00846 | 2.00E-05 | 0.85448 | 0.75962 | (rh.bankssts_2)(rh.inferiorparietal_9)(rh.parahippocampal_3)(rh.superiortemporal_9)    |
| 0.00846 | 2.00E-05 | 0.85448 | 0.75962 | (Right-Accumbens-area)(rh.bankssts_2)(rh.fusiform_7)                                   |
| 0.00846 | 2.00E-05 | 0.85448 | 0.75962 | (Right-Putamen)(rh.inferiorparietal_9)(rh.insula_5)(rh.parahippocampal_3)              |
| 0.00846 | 2.00E-05 | 0.85448 | 0.75962 | (Right-Accumbens-area)(Right-Thalamus-Proper)(rh.bankssts_2)(rh.fusiform_7)            |
| 0.00846 | 2.00E-05 | 0.85448 | 0.75962 | (rh.bankssts_1)(rh.inferiorparietal_9)(rh.lingual_7)(rh.superiortemporal_3)            |
| 0.00846 | 2.00E-05 | 0.85448 | 0.75962 | (Right-Putamen)(rh.inferiorparietal_9)(rh.parahippocampal_2)(rh.parahippocampal_3)     |
| 0.00846 | 2.00E-05 | 0.85448 | 0.75962 | (Right-Accumbens-area)(Right-Putamen)(rh.fusiform_7)(rh.lingual_7)                     |
| 0.00846 | 2.00E-05 | 0.85448 | 0.75962 | (rh.bankssts_1)(rh.fusiform_7)(rh.precuneus_2)(rh.superiortemporal_3)                  |
| 0.00846 | 2.00E-05 | 0.85448 | 0.75962 | (Right-Thalamus-Proper)(rh.inferiorparietal_9)(rh.parahippocampal_2)(rh.parahippocamp  |
| 0.00846 | 2.00E-05 | 0.85448 | 0.75962 | (Right-Accumbens-area)(rh.bankssts_2)(rh.fusiform_7)(rh.insula_2)                      |
| 0.00846 | 2.00E-05 | 0.85448 | 0.75962 | (Right-Accumbens-area)(Right-Pallidum)(rh.fusiform_7)(rh.lingual_7)                    |
| 0.00846 | 2.00E-05 | 0.85448 | 0.75962 | (rh.inferiorparietal_9)(rh.middletemporal_4)(rh.precuneus_2)(rh.superiortemporal_3)    |

|         |          |         |         |                                                                                            |
|---------|----------|---------|---------|--------------------------------------------------------------------------------------------|
| 0.00846 | 3.00E-05 | 0.85448 | 0.75962 | (Right-Accumbens-area)(rh.fusiform_7)(rh.insula_2)(rh.lingual_7)                           |
| 0.00846 | 3.00E-05 | 0.85448 | 0.75962 | (Right-Thalamus-Proper)(rh.bankssts_1)(rh.inferiorparietal_9)(rh.superiortemporal_3)       |
| 0.00846 | 3.00E-05 | 0.85448 | 0.75962 | (rh.inferiorparietal_9)(rh.insula_5)(rh.parahippocampal_3)                                 |
| 0.00846 | 3.00E-05 | 0.85448 | 0.75962 | (rh.inferiorparietal_9)(rh.insula_2)(rh.parahippocampal_2)(rh.parahippocampal_3)           |
| 0.00846 | 3.00E-05 | 0.85448 | 0.75962 | (rh.inferiorparietal_9)(rh.lingual_7)(rh.parahippocampal_3)(rh.superiortemporal_9)         |
| 0.00846 | 3.00E-05 | 0.85448 | 0.75962 | (rh.inferiorparietal_9)(rh.insula_5)(rh.isthmuscingulate_2)(rh.parahippocampal_3)          |
| 0.00846 | 3.00E-05 | 0.85448 | 0.75962 | (Right-Putamen)(rh.bankssts_1)(rh.inferiorparietal_9)(rh.superiortemporal_3)               |
| 0.00846 | 3.00E-05 | 0.85448 | 0.75962 | (Right-Accumbens-area)(rh.fusiform_7)(rh.lingual_7)                                        |
| 0.00846 | 3.00E-05 | 0.85448 | 0.75962 | (Right-Accumbens-area)(rh.fusiform_7)(rh.isthmuscingulate_2)(rh.lingual_7)                 |
| 0.00846 | 3.00E-05 | 0.85448 | 0.75962 | (Right-Thalamus-Proper)(rh.inferiorparietal_9)(rh.insula_5)(rh.parahippocampal_3)          |
| 0.00846 | 3.00E-05 | 0.85448 | 0.75962 | (Right-Pallidum)(rh.inferiorparietal_9)(rh.insula_5)(rh.parahippocampal_3)                 |
| 0.00846 | 3.00E-05 | 0.85448 | 0.75962 | (Right-Pallidum)(rh.inferiorparietal_9)(rh.parahippocampal_2)(rh.parahippocampal_3)        |
| 0.00846 | 3.00E-05 | 0.85448 | 0.75962 | (Right-Accumbens-area)(Right-Putamen)(rh.bankssts_2)(rh.fusiform_7)                        |
| 0.00846 | 3.00E-05 | 0.85448 | 0.75962 | (Right-Accumbens-area)(Right-Thalamus-Proper)(rh.fusiform_7)(rh.lingual_7)                 |
| 0.00846 | 3.00E-05 | 0.85448 | 0.75962 | (Right-Accumbens-area)(Right-Pallidum)(rh.bankssts_2)(rh.fusiform_7)                       |
| 0.00846 | 3.00E-05 | 0.85448 | 0.75962 | (Right-Accumbens-area)(rh.bankssts_2)(rh.fusiform_7)(rh.isthmuscingulate_2)                |
| 0.00846 | 3.00E-05 | 0.85448 | 0.75962 | (rh.inferiorparietal_9)(rh.isthmuscingulate_2)(rh.parahippocampal_2)(rh.parahippocampal_3) |
| 0.00846 | 3.00E-05 | 0.85448 | 0.75962 | (rh.bankssts_1)(rh.bankssts_2)(rh.inferiorparietal_9)(rh.precuneus_2)                      |
| 0.00846 | 3.00E-05 | 0.85448 | 0.75962 | (rh.bankssts_1)(rh.inferiorparietal_9)(rh.superiortemporal_3)                              |
| 0.00846 | 3.00E-05 | 0.85448 | 0.75962 | (rh.inferiorparietal_9)(rh.insula_2)(rh.insula_5)(rh.parahippocampal_3)                    |
| 0.00846 | 3.00E-05 | 0.85448 | 0.75962 | (rh.inferiorparietal_9)(rh.parahippocampal_2)(rh.parahippocampal_3)                        |
| 0.00846 | 3.00E-05 | 0.85448 | 0.75962 | (rh.bankssts_1)(rh.inferiorparietal_9)(rh.isthmuscingulate_2)(rh.superiortemporal_3)       |
| 0.00861 | 3.00E-05 | 0.8097  | 0.70673 | (rh.entorhinal_1)(rh.fusiform_7)(rh.fusiform_8)(rh.precuneus_4)                            |
| 0.00861 | 3.00E-05 | 0.8097  | 0.70673 | (rh.inferiorparietal_9)(rh.inferiortemporal_2)(rh.precuneus_2)(rh.superiortemporal_9)      |
| 0.00861 | 3.00E-05 | 0.8097  | 0.70673 | (rh.inferiorparietal_9)(rh.inferiortemporal_2)(rh.insula_5)(rh.precuneus_2)                |
| 0.00864 | 3.00E-05 | 0.85821 | 0.76442 | (rh.inferiorparietal_9)(rh.insula_5)(rh.superiortemporal_3)(rh.supramarginal_9)            |
| 0.00864 | 3.00E-05 | 0.85821 | 0.76442 | (rh.bankssts_2)(rh.fusiform_7)(rh.fusiform_8)(rh.superiortemporal_6)                       |
| 0.00864 | 3.00E-05 | 0.85821 | 0.76442 | (rh.fusiform_7)(rh.fusiform_8)(rh.lingual_7)(rh.superiortemporal_6)                        |
| 0.00864 | 3.00E-05 | 0.85821 | 0.76442 | (Right-Pallidum)(rh.fusiform_7)(rh.isthmuscingulate_2)(rh.precuneus_4)                     |
| 0.00864 | 3.00E-05 | 0.85821 | 0.76442 | (Right-Pallidum)(Right-Thalamus-Proper)(rh.fusiform_7)(rh.precuneus_4)                     |
| 0.00864 | 3.00E-05 | 0.85821 | 0.76442 | (rh.bankssts_1)(rh.bankssts_2)(rh.fusiform_7)(rh.precuneus_2)                              |
| 0.00864 | 3.00E-05 | 0.85821 | 0.76442 | (rh.inferiorparietal_9)(rh.insula_4)(rh.insula_5)(rh.parahippocampal_2)                    |
| 0.00864 | 3.00E-05 | 0.85821 | 0.76442 | (Right-Pallidum)(rh.fusiform_7)(rh.precuneus_4)                                            |
| 0.00864 | 3.00E-05 | 0.85821 | 0.76442 | (Right-Pallidum)(rh.fusiform_7)(rh.insula_2)(rh.precuneus_4)                               |
| 0.00864 | 3.00E-05 | 0.85821 | 0.76442 | (Right-Caudate)(rh.fusiform_7)(rh.precuneus_2)(rh.superiortemporal_6)                      |



|         |          |         |         |                                                                                             |
|---------|----------|---------|---------|---------------------------------------------------------------------------------------------|
| 0.00864 | 3.00E-05 | 0.85821 | 0.76442 | (Right-Pallidum)(Right-Putamen)(rh.fusiform_7)(rh.precuneus_4)                              |
| 0.00878 | 3.00E-05 | 0.97761 | 0.92788 | (Right-Caudate)(rh.precuneus_2)(rh.superiortemporal_3)                                      |
| 0.00878 | 3.00E-05 | 0.97761 | 0.92788 | (Right-Caudate)(rh.isthmuscingulate_2)(rh.precuneus_2)(rh.superiortemporal_3)               |
| 0.00878 | 3.00E-05 | 0.97761 | 0.92788 | (rh.insula_2)(rh.lingual_7)(rh.parahippocampal_2)(rh.precuneus_2)                           |
| 0.00878 | 3.00E-05 | 0.97761 | 0.92788 | (Right-Caudate)(Right-Thalamus-Proper)(rh.precuneus_2)(rh.superiortemporal_3)               |
| 0.00878 | 3.00E-05 | 0.97761 | 0.92788 | (Right-Caudate)(Right-Putamen)(rh.precuneus_2)(rh.superiortemporal_3)                       |
| 0.00878 | 3.00E-05 | 0.97761 | 0.92788 | (rh.bankssts_2)(rh.insula_2)(rh.parahippocampal_2)(rh.precuneus_2)                          |
| 0.00879 | 3.00E-05 | 0.96269 | 0.90385 | (rh.parahippocampal_2)(rh.precuneus_2)(rh.superiortemporal_3)(rh.supramarginal_9)           |
| 0.0088  | 3.00E-05 | 0.86194 | 0.76923 | (rh.fusiform_7)(rh.parahippocampal_3)(rh.superiortemporal_6)                                |
| 0.0088  | 3.00E-05 | 0.86194 | 0.76923 | (Right-Pallidum)(rh.inferiorparietal_9)(rh.parahippocampal_3)                               |
| 0.0088  | 3.00E-05 | 0.86194 | 0.76923 | (rh.bankssts_2)(rh.inferiorparietal_9)(rh.insula_5)(rh.supramarginal_9)                     |
| 0.0088  | 3.00E-05 | 0.86194 | 0.76923 | (Right-Thalamus-Proper)(rh.inferiorparietal_9)(rh.insula_2)(rh.parahippocampal_3)           |
| 0.0088  | 3.00E-05 | 0.86194 | 0.76923 | (rh.fusiform_7)(rh.insula_2)(rh.parahippocampal_3)(rh.superiortemporal_6)                   |
| 0.0088  | 3.00E-05 | 0.86194 | 0.76923 | (Right-Pallidum)(Right-Thalamus-Proper)(rh.inferiorparietal_9)(rh.parahippocampal_3)        |
| 0.0088  | 3.00E-05 | 0.86194 | 0.76923 | (rh.inferiorparietal_9)(rh.insula_2)(rh.isthmuscingulate_2)(rh.parahippocampal_3)           |
| 0.0088  | 3.00E-05 | 0.86194 | 0.76923 | (Right-Pallidum)(rh.inferiorparietal_9)(rh.isthmuscingulate_2)(rh.parahippocampal_3)        |
| 0.0088  | 3.00E-05 | 0.86194 | 0.76923 | (rh.inferiorparietal_9)(rh.insula_2)(rh.parahippocampal_3)                                  |
| 0.0088  | 3.00E-05 | 0.86194 | 0.76923 | (rh.fusiform_7)(rh.inferiortemporal_2)(rh.isthmuscingulate_2)(rh.precuneus_2)               |
| 0.0088  | 3.00E-05 | 0.86194 | 0.76923 | (Right-Pallidum)(rh.fusiform_7)(rh.parahippocampal_3)(rh.superiortemporal_6)                |
| 0.0088  | 3.00E-05 | 0.86194 | 0.76923 | (rh.fusiform_7)(rh.insula_5)(rh.precuneus_2)(rh.superiortemporal_6)                         |
| 0.0088  | 3.00E-05 | 0.86194 | 0.76923 | (rh.fusiform_7)(rh.inferiortemporal_2)(rh.insula_2)(rh.precuneus_2)                         |
| 0.0088  | 3.00E-05 | 0.86194 | 0.76923 | (rh.inferiorparietal_9)(rh.insula_5)(rh.lingual_7)(rh.supramarginal_9)                      |
| 0.0088  | 3.00E-05 | 0.86194 | 0.76923 | (rh.entorhinal_1)(rh.fusiform_7)(rh.inferiorparietal_10)(rh.precuneus_2)                    |
| 0.0088  | 3.00E-05 | 0.86194 | 0.76923 | (Right-Thalamus-Proper)(rh.fusiform_7)(rh.inferiortemporal_2)(rh.precuneus_2)               |
| 0.0088  | 3.00E-05 | 0.86194 | 0.76923 | (rh.fusiform_7)(rh.insula_2)(rh.precuneus_2)(rh.precuneus_7)                                |
| 0.0088  | 3.00E-05 | 0.86194 | 0.76923 | (Right-Thalamus-Proper)(rh.fusiform_7)(rh.precuneus_2)(rh.precuneus_7)                      |
| 0.0088  | 3.00E-05 | 0.86194 | 0.76923 | (Right-Pallidum)(rh.fusiform_7)(rh.inferiortemporal_2)(rh.precuneus_2)                      |
| 0.0088  | 3.00E-05 | 0.86194 | 0.76923 | (Right-Putamen)(rh.inferiorparietal_9)(rh.isthmuscingulate_2)(rh.parahippocampal_3)         |
| 0.0088  | 3.00E-05 | 0.86194 | 0.76923 | (rh.fusiform_7)(rh.superiortemporal_3)(rh.superiortemporal_6)(rh.supramarginal_9)           |
| 0.0088  | 3.00E-05 | 0.86194 | 0.76923 | (Right-Thalamus-Proper)(rh.inferiorparietal_9)(rh.isthmuscingulate_2)(rh.parahippocampal_3) |
| 0.0088  | 3.00E-05 | 0.86194 | 0.76923 | (Right-Pallidum)(Right-Putamen)(rh.inferiorparietal_9)(rh.parahippocampal_3)                |
| 0.0088  | 3.00E-05 | 0.86194 | 0.76923 | (rh.entorhinal_1)(rh.fusiform_7)(rh.parahippocampal_3)(rh.supramarginal_9)                  |
| 0.0088  | 3.00E-05 | 0.86194 | 0.76923 | (rh.fusiform_7)(rh.precuneus_2)(rh.precuneus_7)                                             |
| 0.0088  | 3.00E-05 | 0.86194 | 0.76923 | (rh.inferiorparietal_9)(rh.insula_5)(rh.precuneus_2)(rh.superiortemporal_9)                 |
| 0.0088  | 3.00E-05 | 0.86194 | 0.76923 | (Right-Pallidum)(rh.inferiorparietal_9)(rh.insula_2)(rh.parahippocampal_3)                  |

|         |          |         |         |                                                                                       |
|---------|----------|---------|---------|---------------------------------------------------------------------------------------|
| 0.0088  | 3.00E-05 | 0.86194 | 0.76923 | (rh.inferiorparietal_9)(rh.isthmuscingulate_2)(rh.parahippocampal_3)                  |
| 0.0088  | 3.00E-05 | 0.86194 | 0.76923 | (Right-Thalamus-Proper)(rh.fusiform_7)(rh.parahippocampal_3)(rh.superiortemporal_6)   |
| 0.0088  | 3.00E-05 | 0.86194 | 0.76923 | (Right-Putamen)(Right-Thalamus-Proper)(rh.inferiorparietal_9)(rh.parahippocampal_3)   |
| 0.0088  | 3.00E-05 | 0.86194 | 0.76923 | (Right-Putamen)(rh.fusiform_7)(rh.precuneus_2)(rh.precuneus_7)                        |
| 0.0088  | 3.00E-05 | 0.86194 | 0.76923 | (rh.fusiform_7)(rh.inferiortemporal_2)(rh.precuneus_2)                                |
| 0.0088  | 3.00E-05 | 0.86194 | 0.76923 | (Right-Putamen)(rh.inferiorparietal_9)(rh.parahippocampal_3)                          |
| 0.0088  | 3.00E-05 | 0.86194 | 0.76923 | (Right-Putamen)(rh.fusiform_7)(rh.parahippocampal_3)(rh.superiortemporal_6)           |
| 0.0088  | 3.00E-05 | 0.86194 | 0.76923 | (Right-Thalamus-Proper)(rh.inferiorparietal_9)(rh.parahippocampal_3)                  |
| 0.0088  | 3.00E-05 | 0.86194 | 0.76923 | (rh.fusiform_7)(rh.isthmuscingulate_2)(rh.parahippocampal_3)(rh.superiortemporal_6)   |
| 0.0088  | 3.00E-05 | 0.86194 | 0.76923 | (rh.fusiform_7)(rh.isthmuscingulate_2)(rh.precuneus_2)(rh.precuneus_7)                |
| 0.0088  | 3.00E-05 | 0.86194 | 0.76923 | (rh.entorhinal_1)(rh.fusiform_7)(rh.inferiorparietal_4)(rh.precuneus_2)               |
| 0.0088  | 3.00E-05 | 0.86194 | 0.76923 | (Right-Putamen)(rh.inferiorparietal_9)(rh.insula_2)(rh.parahippocampal_3)             |
| 0.0088  | 3.00E-05 | 0.86194 | 0.76923 | (Right-Putamen)(rh.fusiform_7)(rh.inferiortemporal_2)(rh.precuneus_2)                 |
| 0.0089  | 3.00E-05 | 0.81343 | 0.71154 | (rh.inferiorparietal_9)(rh.insula_5)(rh.precuneus_4)                                  |
| 0.0089  | 3.00E-05 | 0.81343 | 0.71154 | (rh.inferiorparietal_9)(rh.insula_5)(rh.isthmuscingulate_2)(rh.precuneus_4)           |
| 0.0089  | 3.00E-05 | 0.81343 | 0.71154 | (Right-Pallidum)(rh.inferiorparietal_9)(rh.insula_5)(rh.precuneus_4)                  |
| 0.0089  | 3.00E-05 | 0.81343 | 0.71154 | (Right-Putamen)(rh.inferiorparietal_9)(rh.insula_5)(rh.precuneus_4)                   |
| 0.0089  | 3.00E-05 | 0.81343 | 0.71154 | (rh.fusiform_7)(rh.inferiorparietal_10)(rh.inferiorparietal_9)(rh.precuneus_3)        |
| 0.0089  | 3.00E-05 | 0.81343 | 0.71154 | (rh.fusiform_7)(rh.isthmuscingulate_1)(rh.precuneus_7)(rh.superiortemporal_3)         |
| 0.0089  | 3.00E-05 | 0.81343 | 0.71154 | (rh.entorhinal_1)(rh.inferiorparietal_9)(rh.parahippocampal_2)(rh.supramarginal_9)    |
| 0.0089  | 3.00E-05 | 0.81343 | 0.71154 | (rh.inferiorparietal_9)(rh.insula_2)(rh.insula_5)(rh.precuneus_4)                     |
| 0.0089  | 3.00E-05 | 0.81343 | 0.71154 | (Right-Caudate)(rh.fusiform_7)(rh.isthmuscingulate_1)(rh.precuneus_7)                 |
| 0.0089  | 3.00E-05 | 0.81343 | 0.71154 | (Right-Thalamus-Proper)(rh.inferiorparietal_9)(rh.insula_5)(rh.precuneus_4)           |
| 0.0089  | 3.00E-05 | 0.81343 | 0.71154 | (rh.entorhinal_1)(rh.inferiorparietal_9)(rh.parahippocampal_3)(rh.supramarginal_9)    |
| 0.00896 | 3.00E-05 | 0.86567 | 0.77404 | (rh.entorhinal_1)(rh.fusiform_7)(rh.fusiform_8)(rh.parahippocampal_3)                 |
| 0.00896 | 3.00E-05 | 0.86567 | 0.77404 | (rh.entorhinal_1)(rh.fusiform_7)(rh.superiortemporal_3)(rh.supramarginal_9)           |
| 0.00896 | 3.00E-05 | 0.86567 | 0.77404 | (rh.inferiorparietal_9)(rh.insula_4)(rh.precuneus_2)(rh.superiortemporal_3)           |
| 0.00911 | 3.00E-05 | 0.8694  | 0.77885 | (rh.entorhinal_1)(rh.fusiform_7)(rh.lingual_7)(rh.supramarginal_9)                    |
| 0.00911 | 3.00E-05 | 0.8694  | 0.77885 | (Right-Thalamus-Proper)(rh.inferiorparietal_9)(rh.precuneus_2)(rh.superiortemporal_9) |
| 0.00911 | 3.00E-05 | 0.8694  | 0.77885 | (rh.inferiorparietal_9)(rh.insula_2)(rh.precuneus_2)(rh.superiortemporal_9)           |
| 0.00911 | 3.00E-05 | 0.8694  | 0.77885 | (rh.inferiorparietal_9)(rh.insula_4)(rh.lingual_7)(rh.precuneus_2)                    |
| 0.00911 | 3.00E-05 | 0.8694  | 0.77885 | (rh.bankssts_2)(rh.entorhinal_1)(rh.fusiform_7)(rh.supramarginal_9)                   |
| 0.00911 | 3.00E-05 | 0.8694  | 0.77885 | (rh.bankssts_2)(rh.inferiorparietal_9)(rh.insula_4)(rh.precuneus_2)                   |
| 0.00911 | 3.00E-05 | 0.8694  | 0.77885 | (Right-Pallidum)(rh.inferiorparietal_9)(rh.precuneus_2)(rh.superiortemporal_9)        |
| 0.00911 | 3.00E-05 | 0.8694  | 0.77885 | (rh.inferiorparietal_9)(rh.isthmuscingulate_2)(rh.precuneus_2)(rh.superiortemporal_9) |

|         |          |         |         |                                                                                        |
|---------|----------|---------|---------|----------------------------------------------------------------------------------------|
| 0.00911 | 3.00E-05 | 0.8694  | 0.77885 | (rh.entorhinal_1)(rh.fusiform_7)(rh.fusiform_8)(rh.superiortemporal_3)                 |
| 0.00911 | 3.00E-05 | 0.8694  | 0.77885 | (rh.inferiorparietal_9)(rh.precuneus_2)(rh.superiortemporal_9)                         |
| 0.00911 | 3.00E-05 | 0.8694  | 0.77885 | (Right-Putamen)(rh.inferiorparietal_9)(rh.precuneus_2)(rh.superiortemporal_9)          |
| 0.00919 | 3.00E-05 | 0.81716 | 0.71635 | (rh.inferiorparietal_9)(rh.parahippocampal_2)(rh.precuneus_2)(rh.superiortemporal_6)   |
| 0.00919 | 3.00E-05 | 0.81716 | 0.71635 | (Right-Accumbens-area)(rh.fusiform_7)(rh.superiortemporal_6)(rh.superiortemporal_9)    |
| 0.00919 | 4.00E-05 | 0.81716 | 0.71635 | (rh.entorhinal_1)(rh.inferiorparietal_9)(rh.insula_4)(rh.parahippocampal_3)            |
| 0.00919 | 4.00E-05 | 0.81716 | 0.71635 | (Right-Accumbens-area)(rh.fusiform_7)(rh.insula_5)(rh.superiortemporal_6)              |
| 0.00919 | 4.00E-05 | 0.81716 | 0.71635 | (rh.bankssts_2)(rh.fusiform_7)(rh.isthmuscingulate_1)(rh.precuneus_7)                  |
| 0.00923 | 4.00E-05 | 0.92537 | 0.85096 | (Right-Putamen)(rh.fusiform_7)                                                         |
| 0.00923 | 4.00E-05 | 0.92537 | 0.85096 | (Right-Putamen)(Right-Thalamus-Proper)(rh.fusiform_7)(rh.isthmuscingulate_2)           |
| 0.00923 | 4.00E-05 | 0.92537 | 0.85096 | (Right-Putamen)(Right-Thalamus-Proper)(rh.fusiform_7)                                  |
| 0.00923 | 4.00E-05 | 0.92537 | 0.85096 | (rh.fusiform_7)                                                                        |
| 0.00923 | 4.00E-05 | 0.92537 | 0.85096 | (rh.fusiform_7)(rh.isthmuscingulate_2)                                                 |
| 0.00923 | 4.00E-05 | 0.92537 | 0.85096 | (Right-Thalamus-Proper)(rh.fusiform_7)(rh.isthmuscingulate_2)                          |
| 0.00923 | 4.00E-05 | 0.92537 | 0.85096 | (Right-Putamen)(rh.fusiform_7)(rh.isthmuscingulate_2)                                  |
| 0.00923 | 4.00E-05 | 0.92537 | 0.85096 | (Right-Putamen)(rh.fusiform_7)(rh.insula_2)(rh.isthmuscingulate_2)                     |
| 0.00923 | 4.00E-05 | 0.92537 | 0.85096 | (Right-Putamen)(Right-Thalamus-Proper)(rh.fusiform_7)(rh.insula_2)                     |
| 0.00923 | 4.00E-05 | 0.92537 | 0.85096 | (rh.fusiform_7)(rh.insula_2)(rh.isthmuscingulate_2)                                    |
| 0.00923 | 4.00E-05 | 0.92537 | 0.85096 | (Right-Thalamus-Proper)(rh.fusiform_7)(rh.insula_2)                                    |
| 0.00923 | 4.00E-05 | 0.92537 | 0.85096 | (Right-Thalamus-Proper)(rh.fusiform_7)                                                 |
| 0.00923 | 4.00E-05 | 0.92537 | 0.85096 | (Right-Thalamus-Proper)(rh.fusiform_7)(rh.insula_2)(rh.isthmuscingulate_2)             |
| 0.00923 | 4.00E-05 | 0.92537 | 0.85096 | (rh.fusiform_7)(rh.insula_2)                                                           |
| 0.00923 | 4.00E-05 | 0.92537 | 0.85096 | (Right-Putamen)(rh.fusiform_7)(rh.insula_2)                                            |
| 0.00925 | 4.00E-05 | 0.87313 | 0.78365 | (rh.fusiform_7)(rh.fusiform_8)(rh.inferiorparietal_4)(rh.parahippocampal_3)            |
| 0.00925 | 4.00E-05 | 0.87313 | 0.78365 | (rh.inferiorparietal_9)(rh.insula_2)(rh.insula_5)(rh.superiortemporal_3)               |
| 0.00925 | 4.00E-05 | 0.87313 | 0.78365 | (Right-Putamen)(rh.inferiorparietal_9)(rh.insula_5)(rh.superiortemporal_3)             |
| 0.00925 | 4.00E-05 | 0.87313 | 0.78365 | (rh.inferiorparietal_9)(rh.parahippocampal_2)(rh.superiortemporal_1)(rh.superiortempor |
| 0.00925 | 4.00E-05 | 0.87313 | 0.78365 | (rh.entorhinal_1)(rh.fusiform_7)(rh.insula_5)(rh.parahippocampal_3)                    |
| 0.00925 | 4.00E-05 | 0.87313 | 0.78365 | (Right-Pallidum)(rh.inferiorparietal_9)(rh.insula_5)(rh.superiortemporal_3)            |
| 0.00925 | 4.00E-05 | 0.87313 | 0.78365 | (rh.entorhinal_1)(rh.fusiform_7)(rh.fusiform_8)(rh.lingual_7)                          |
| 0.00925 | 4.00E-05 | 0.87313 | 0.78365 | (rh.fusiform_7)(rh.lingual_7)(rh.superiortemporal_3)(rh.superiortemporal_6)            |
| 0.00925 | 4.00E-05 | 0.87313 | 0.78365 | (Right-Thalamus-Proper)(rh.inferiorparietal_9)(rh.insula_5)(rh.superiortemporal_3)     |
| 0.00925 | 4.00E-05 | 0.87313 | 0.78365 | (rh.inferiorparietal_9)(rh.insula_5)(rh.isthmuscingulate_2)(rh.superiortemporal_3)     |
| 0.00925 | 4.00E-05 | 0.87313 | 0.78365 | (rh.inferiorparietal_9)(rh.parahippocampal_2)(rh.precuneus_2)(rh.superiortemporal_1)   |
| 0.00925 | 4.00E-05 | 0.87313 | 0.78365 | (rh.inferiorparietal_9)(rh.insula_5)(rh.superiortemporal_3)                            |

|         |          |         |         |                                                                                     |
|---------|----------|---------|---------|-------------------------------------------------------------------------------------|
| 0.00925 | 4.00E-05 | 0.87313 | 0.78365 | (rh.bankssts_2)(rh.fusiform_7)(rh.superiortemporal_3)(rh.superiortemporal_6)        |
| 0.00925 | 4.00E-05 | 0.87313 | 0.78365 | (rh.bankssts_2)(rh.entorhinal_1)(rh.fusiform_7)(rh.fusiform_8)                      |
| 0.00938 | 4.00E-05 | 0.87687 | 0.78846 | (rh.inferiorparietal_9)(rh.precuneus_2)(rh.superiortemporal_1)(rh.supramarginal_9)  |
| 0.00938 | 4.00E-05 | 0.87687 | 0.78846 | (Right-Thalamus-Proper)(rh.inferiorparietal_9)(rh.insula_5)(rh.lingual_7)           |
| 0.00938 | 4.00E-05 | 0.87687 | 0.78846 | (Right-Thalamus-Proper)(rh.bankssts_2)(rh.inferiorparietal_9)(rh.insula_5)          |
| 0.00938 | 4.00E-05 | 0.87687 | 0.78846 | (rh.inferiorparietal_9)(rh.insula_5)(rh.isthmuscingulate_2)(rh.lingual_7)           |
| 0.00938 | 4.00E-05 | 0.87687 | 0.78846 | (Right-Putamen)(rh.bankssts_2)(rh.inferiorparietal_9)(rh.insula_5)                  |
| 0.00938 | 4.00E-05 | 0.87687 | 0.78846 | (rh.inferiorparietal_9)(rh.insula_5)(rh.lingual_7)                                  |
| 0.00938 | 4.00E-05 | 0.87687 | 0.78846 | (rh.bankssts_2)(rh.inferiorparietal_9)(rh.insula_5)                                 |
| 0.00938 | 4.00E-05 | 0.87687 | 0.78846 | (rh.bankssts_2)(rh.inferiorparietal_9)(rh.insula_2)(rh.insula_5)                    |
| 0.00938 | 4.00E-05 | 0.87687 | 0.78846 | (Right-Pallidum)(rh.inferiorparietal_9)(rh.insula_5)(rh.lingual_7)                  |
| 0.00938 | 4.00E-05 | 0.87687 | 0.78846 | (Right-Pallidum)(rh.bankssts_2)(rh.inferiorparietal_9)(rh.insula_5)                 |
| 0.00938 | 4.00E-05 | 0.87687 | 0.78846 | (rh.bankssts_2)(rh.inferiorparietal_9)(rh.insula_5)(rh.isthmuscingulate_2)          |
| 0.00938 | 4.00E-05 | 0.87687 | 0.78846 | (rh.fusiform_7)(rh.fusiform_8)(rh.insula_4)(rh.parahippocampal_3)                   |
| 0.00938 | 4.00E-05 | 0.87687 | 0.78846 | (rh.inferiorparietal_9)(rh.insula_2)(rh.insula_5)(rh.lingual_7)                     |
| 0.00938 | 4.00E-05 | 0.87687 | 0.78846 | (rh.fusiform_7)(rh.fusiform_8)(rh.parahippocampal_2)(rh.parahippocampal_3)          |
| 0.00938 | 4.00E-05 | 0.87687 | 0.78846 | (Right-Putamen)(rh.inferiorparietal_9)(rh.insula_5)(rh.lingual_7)                   |
| 0.0094  | 4.00E-05 | 0.92164 | 0.84615 | (Right-Pallidum)(rh.fusiform_7)(rh.lingual_7)                                       |
| 0.0094  | 4.00E-05 | 0.92164 | 0.84615 | (Right-Pallidum)(Right-Thalamus-Proper)(rh.bankssts_2)(rh.fusiform_7)               |
| 0.0094  | 4.00E-05 | 0.92164 | 0.84615 | (Right-Pallidum)(rh.bankssts_2)(rh.fusiform_7)(rh.insula_2)                         |
| 0.0094  | 4.00E-05 | 0.92164 | 0.84615 | (Right-Pallidum)(rh.fusiform_7)(rh.insula_2)(rh.lingual_7)                          |
| 0.0094  | 4.00E-05 | 0.92164 | 0.84615 | (Right-Pallidum)(Right-Putamen)(rh.fusiform_7)(rh.lingual_7)                        |
| 0.0094  | 4.00E-05 | 0.92164 | 0.84615 | (Right-Pallidum)(Right-Putamen)(rh.bankssts_2)(rh.fusiform_7)                       |
| 0.0094  | 4.00E-05 | 0.92164 | 0.84615 | (Right-Pallidum)(rh.bankssts_2)(rh.fusiform_7)(rh.isthmuscingulate_2)               |
| 0.0094  | 4.00E-05 | 0.92164 | 0.84615 | (Right-Pallidum)(rh.bankssts_2)(rh.fusiform_7)                                      |
| 0.0094  | 4.00E-05 | 0.92164 | 0.84615 | (Right-Pallidum)(rh.fusiform_7)(rh.isthmuscingulate_2)(rh.lingual_7)                |
| 0.0094  | 4.00E-05 | 0.92164 | 0.84615 | (Right-Pallidum)(Right-Thalamus-Proper)(rh.fusiform_7)(rh.lingual_7)                |
| 0.00948 | 4.00E-05 | 0.8209  | 0.72115 | (rh.entorhinal_1)(rh.fusiform_7)(rh.isthmuscingulate_2)(rh.precuneus_4)             |
| 0.00948 | 4.00E-05 | 0.8209  | 0.72115 | (Right-Pallidum)(rh.entorhinal_1)(rh.fusiform_7)(rh.precuneus_4)                    |
| 0.00948 | 4.00E-05 | 0.8209  | 0.72115 | (Right-Putamen)(rh.entorhinal_1)(rh.fusiform_7)(rh.precuneus_4)                     |
| 0.00948 | 4.00E-05 | 0.8209  | 0.72115 | (rh.fusiform_8)(rh.inferiorparietal_9)(rh.parahippocampal_3)(rh.supramarginal_9)    |
| 0.00948 | 4.00E-05 | 0.8209  | 0.72115 | (rh.entorhinal_1)(rh.inferiorparietal_9)(rh.insula_4)(rh.superiortemporal_3)        |
| 0.00948 | 4.00E-05 | 0.8209  | 0.72115 | (Right-Pallidum)(rh.fusiform_7)(rh.inferiorparietal_9)(rh.superiortemporal_1)       |
| 0.00948 | 5.00E-05 | 0.8209  | 0.72115 | (rh.entorhinal_1)(rh.inferiorparietal_9)(rh.isthmuscingulate_2)(rh.supramarginal_9) |
| 0.00948 | 5.00E-05 | 0.8209  | 0.72115 | (Right-Pallidum)(rh.fusiform_7)(rh.precuneus_4)(rh.precuneus_7)                     |

|         |          |         |         |                                                                                      |
|---------|----------|---------|---------|--------------------------------------------------------------------------------------|
| 0.00948 | 5.00E-05 | 0.8209  | 0.72115 | (rh.entorhinal_1)(rh.fusiform_7)(rh.precuneus_4)(rh.superiortemporal_9)              |
| 0.00948 | 5.00E-05 | 0.8209  | 0.72115 | (rh.entorhinal_1)(rh.fusiform_7)(rh.insula_2)(rh.precuneus_4)                        |
| 0.00948 | 5.00E-05 | 0.8209  | 0.72115 | (rh.entorhinal_1)(rh.inferiorparietal_9)(rh.superiortemporal_9)(rh.supramarginal_9)  |
| 0.00948 | 5.00E-05 | 0.8209  | 0.72115 | (Right-Pallidum)(rh.entorhinal_1)(rh.inferiorparietal_9)(rh.supramarginal_9)         |
| 0.00948 | 5.00E-05 | 0.8209  | 0.72115 | (Right-Putamen)(rh.entorhinal_1)(rh.inferiorparietal_9)(rh.supramarginal_9)          |
| 0.00948 | 5.00E-05 | 0.8209  | 0.72115 | (Right-Thalamus-Proper)(rh.entorhinal_1)(rh.fusiform_7)(rh.precuneus_4)              |
| 0.00948 | 5.00E-05 | 0.8209  | 0.72115 | (Right-Thalamus-Proper)(rh.entorhinal_1)(rh.inferiorparietal_9)(rh.supramarginal_9)  |
| 0.00948 | 5.00E-05 | 0.8209  | 0.72115 | (rh.fusiform_7)(rh.inferiorparietal_4)(rh.inferiorparietal_9)(rh.insula_4)           |
| 0.00948 | 5.00E-05 | 0.8209  | 0.72115 | (rh.fusiform_7)(rh.parahippocampal_3)(rh.precuneus_4)(rh.superiortemporal_1)         |
| 0.00948 | 5.00E-05 | 0.8209  | 0.72115 | (rh.fusiform_7)(rh.inferiorparietal_10)(rh.inferiorparietal_9)(rh.insula_4)          |
| 0.00948 | 5.00E-05 | 0.8209  | 0.72115 | (rh.entorhinal_1)(rh.inferiorparietal_9)(rh.insula_2)(rh.supramarginal_9)            |
| 0.00949 | 5.00E-05 | 0.8806  | 0.79327 | (rh.inferiorparietal_4)(rh.inferiorparietal_9)(rh.parahippocampal_2)(rh.precuneus_2) |
| 0.00949 | 5.00E-05 | 0.8806  | 0.79327 | (Right-Pallidum)(rh.entorhinal_1)(rh.fusiform_7)(rh.superiortemporal_3)              |
| 0.00949 | 5.00E-05 | 0.8806  | 0.79327 | (Right-Putamen)(rh.entorhinal_1)(rh.fusiform_7)(rh.superiortemporal_3)               |
| 0.00949 | 5.00E-05 | 0.8806  | 0.79327 | (Right-Thalamus-Proper)(rh.entorhinal_1)(rh.fusiform_7)(rh.superiortemporal_3)       |
| 0.00949 | 5.00E-05 | 0.8806  | 0.79327 | (rh.entorhinal_1)(rh.fusiform_7)(rh.isthmuscingulate_2)(rh.superiortemporal_3)       |
| 0.00949 | 5.00E-05 | 0.8806  | 0.79327 | (rh.entorhinal_1)(rh.fusiform_7)(rh.insula_2)(rh.superiortemporal_3)                 |
| 0.00949 | 5.00E-05 | 0.8806  | 0.79327 | (rh.entorhinal_1)(rh.fusiform_7)(rh.superiortemporal_3)                              |
| 0.00949 | 5.00E-05 | 0.8806  | 0.79327 | (rh.fusiform_7)(rh.fusiform_8)(rh.insula_4)(rh.precuneus_2)                          |
| 0.00949 | 5.00E-05 | 0.8806  | 0.79327 | (rh.entorhinal_1)(rh.fusiform_7)(rh.superiortemporal_3)(rh.superiortemporal_9)       |
| 0.00955 | 5.00E-05 | 0.91791 | 0.84135 | (Right-Pallidum)(Right-Putamen)(rh.fusiform_7)(rh.superiortemporal_3)                |
| 0.00955 | 5.00E-05 | 0.91791 | 0.84135 | (Right-Pallidum)(Right-Thalamus-Proper)(rh.fusiform_7)(rh.superiortemporal_3)        |
| 0.00955 | 5.00E-05 | 0.91791 | 0.84135 | (Right-Pallidum)(rh.fusiform_7)(rh.insula_2)(rh.superiortemporal_3)                  |
| 0.00955 | 5.00E-05 | 0.91791 | 0.84135 | (Right-Pallidum)(rh.fusiform_7)(rh.isthmuscingulate_2)(rh.superiortemporal_3)        |
| 0.00955 | 5.00E-05 | 0.91791 | 0.84135 | (Right-Pallidum)(rh.fusiform_7)(rh.superiortemporal_3)                               |
| 0.00959 | 5.00E-05 | 0.88433 | 0.79808 | (Right-Thalamus-Proper)(rh.entorhinal_1)(rh.fusiform_7)(rh.lingual_7)                |
| 0.00959 | 5.00E-05 | 0.88433 | 0.79808 | (rh.entorhinal_1)(rh.fusiform_7)(rh.lingual_7)(rh.superiortemporal_9)                |
| 0.00959 | 5.00E-05 | 0.88433 | 0.79808 | (Right-Pallidum)(rh.bankssts_2)(rh.entorhinal_1)(rh.fusiform_7)                      |
| 0.00959 | 5.00E-05 | 0.88433 | 0.79808 | (rh.inferiorparietal_10)(rh.inferiorparietal_9)(rh.insula_2)(rh.supramarginal_9)     |
| 0.00959 | 5.00E-05 | 0.88433 | 0.79808 | (Right-Putamen)(rh.bankssts_2)(rh.entorhinal_1)(rh.fusiform_7)                       |
| 0.00959 | 5.00E-05 | 0.88433 | 0.79808 | (rh.bankssts_2)(rh.entorhinal_1)(rh.fusiform_7)                                      |
| 0.00959 | 5.00E-05 | 0.88433 | 0.79808 | (Right-Pallidum)(rh.inferiorparietal_9)(rh.superiortemporal_3)(rh.supramarginal_9)   |
| 0.00959 | 5.00E-05 | 0.88433 | 0.79808 | (rh.entorhinal_1)(rh.fusiform_7)(rh.insula_2)(rh.lingual_7)                          |
| 0.00959 | 5.00E-05 | 0.88433 | 0.79808 | (rh.fusiform_7)(rh.parahippocampal_2)(rh.precuneus_2)(rh.precuneus_3)                |
| 0.00959 | 5.00E-05 | 0.88433 | 0.79808 | (rh.entorhinal_1)(rh.fusiform_7)(rh.isthmuscingulate_2)(rh.lingual_7)                |

|         |          |         |         |                                                                                      |
|---------|----------|---------|---------|--------------------------------------------------------------------------------------|
| 0.00959 | 5.00E-05 | 0.88433 | 0.79808 | (Right-Pallidum)(rh.entorhinal_1)(rh.fusiform_7)(rh.lingual_7)                       |
| 0.00959 | 5.00E-05 | 0.88433 | 0.79808 | (rh.entorhinal_1)(rh.fusiform_7)(rh.lingual_7)                                       |
| 0.00959 | 5.00E-05 | 0.88433 | 0.79808 | (Right-Thalamus-Proper)(rh.bankssts_2)(rh.entorhinal_1)(rh.fusiform_7)               |
| 0.00959 | 5.00E-05 | 0.88433 | 0.79808 | (Right-Putamen)(rh.entorhinal_1)(rh.fusiform_7)(rh.lingual_7)                        |
| 0.00959 | 6.00E-05 | 0.88433 | 0.79808 | (rh.bankssts_2)(rh.entorhinal_1)(rh.fusiform_7)(rh.isthmuscingulate_2)               |
| 0.00959 | 6.00E-05 | 0.88433 | 0.79808 | (rh.bankssts_2)(rh.entorhinal_1)(rh.fusiform_7)(rh.insula_2)                         |
| 0.00959 | 6.00E-05 | 0.88433 | 0.79808 | (rh.bankssts_2)(rh.entorhinal_1)(rh.fusiform_7)(rh.superiortemporal_9)               |
| 0.00959 | 6.00E-05 | 0.88433 | 0.79808 | (rh.fusiform_7)(rh.inferiorparietal_10)(rh.parahippocampal_3)(rh.superiortemporal_3) |
| 0.00959 | 6.00E-05 | 0.88433 | 0.79808 | (rh.fusiform_7)(rh.insula_5)(rh.parahippocampal_3)(rh.supramarginal_9)               |
| 0.00966 | 6.00E-05 | 0.91418 | 0.83654 | (Right-Caudate)(rh.bankssts_2)(rh.fusiform_7)(rh.isthmuscingulate_2)                 |
| 0.00966 | 6.00E-05 | 0.91418 | 0.83654 | (Right-Putamen)(rh.fusiform_7)(rh.parahippocampal_2)                                 |
| 0.00966 | 6.00E-05 | 0.91418 | 0.83654 | (rh.fusiform_7)(rh.insula_2)(rh.parahippocampal_2)                                   |
| 0.00966 | 6.00E-05 | 0.91418 | 0.83654 | (Right-Thalamus-Proper)(rh.fusiform_7)(rh.insula_2)(rh.parahippocampal_2)            |
| 0.00966 | 6.00E-05 | 0.91418 | 0.83654 | (Right-Caudate)(rh.fusiform_7)(rh.insula_2)(rh.lingual_7)                            |
| 0.00966 | 6.00E-05 | 0.91418 | 0.83654 | (Right-Putamen)(Right-Thalamus-Proper)(rh.fusiform_7)(rh.parahippocampal_2)          |
| 0.00966 | 6.00E-05 | 0.91418 | 0.83654 | (rh.fusiform_7)(rh.isthmuscingulate_2)(rh.parahippocampal_2)                         |
| 0.00966 | 6.00E-05 | 0.91418 | 0.83654 | (Right-Caudate)(Right-Putamen)(rh.fusiform_7)(rh.lingual_7)                          |
| 0.00966 | 6.00E-05 | 0.91418 | 0.83654 | (Right-Caudate)(Right-Thalamus-Proper)(rh.bankssts_2)(rh.fusiform_7)                 |
| 0.00966 | 6.00E-05 | 0.91418 | 0.83654 | (Right-Caudate)(Right-Thalamus-Proper)(rh.fusiform_7)(rh.lingual_7)                  |
| 0.00966 | 6.00E-05 | 0.91418 | 0.83654 | (rh.bankssts_2)(rh.fusiform_7)(rh.insula_5)(rh.lingual_7)                            |
| 0.00966 | 6.00E-05 | 0.91418 | 0.83654 | (Right-Caudate)(rh.fusiform_7)(rh.isthmuscingulate_2)(rh.lingual_7)                  |
| 0.00966 | 6.00E-05 | 0.91418 | 0.83654 | (rh.fusiform_7)(rh.parahippocampal_2)                                                |
| 0.00966 | 6.00E-05 | 0.91418 | 0.83654 | (Right-Caudate)(Right-Putamen)(rh.bankssts_2)(rh.fusiform_7)                         |
| 0.00966 | 6.00E-05 | 0.91418 | 0.83654 | (Right-Thalamus-Proper)(rh.bankssts_2)(rh.inferiorparietal_9)(rh.lingual_7)          |
| 0.00966 | 6.00E-05 | 0.91418 | 0.83654 | (Right-Caudate)(rh.bankssts_2)(rh.fusiform_7)(rh.insula_2)                           |
| 0.00966 | 6.00E-05 | 0.91418 | 0.83654 | (Right-Caudate)(rh.fusiform_7)(rh.lingual_7)                                         |
| 0.00966 | 6.00E-05 | 0.91418 | 0.83654 | (Right-Putamen)(rh.fusiform_7)(rh.insula_2)(rh.parahippocampal_2)                    |
| 0.00966 | 6.00E-05 | 0.91418 | 0.83654 | (Right-Putamen)(rh.fusiform_7)(rh.isthmuscingulate_2)(rh.parahippocampal_2)          |
| 0.00966 | 6.00E-05 | 0.91418 | 0.83654 | (rh.bankssts_2)(rh.inferiorparietal_9)(rh.isthmuscingulate_2)(rh.lingual_7)          |
| 0.00966 | 6.00E-05 | 0.91418 | 0.83654 | (rh.bankssts_2)(rh.inferiorparietal_9)(rh.lingual_7)                                 |
| 0.00966 | 6.00E-05 | 0.91418 | 0.83654 | (Right-Putamen)(rh.bankssts_2)(rh.inferiorparietal_9)(rh.lingual_7)                  |
| 0.00966 | 6.00E-05 | 0.91418 | 0.83654 | (Right-Thalamus-Proper)(rh.fusiform_7)(rh.parahippocampal_2)                         |
| 0.00966 | 7.00E-05 | 0.91418 | 0.83654 | (rh.fusiform_7)(rh.insula_2)(rh.isthmuscingulate_2)(rh.parahippocampal_2)            |
| 0.00966 | 7.00E-05 | 0.91418 | 0.83654 | (Right-Thalamus-Proper)(rh.fusiform_7)(rh.isthmuscingulate_2)(rh.parahippocampal_2)  |
| 0.00966 | 7.00E-05 | 0.91418 | 0.83654 | (Right-Caudate)(rh.bankssts_2)(rh.fusiform_7)                                        |

|         |          |         |         |                                                                                      |
|---------|----------|---------|---------|--------------------------------------------------------------------------------------|
| 0.00967 | 7.00E-05 | 0.88806 | 0.80288 | (rh.inferiorparietal_10)(rh.inferiorparietal_9)(rh.insula_2)(rh.parahippocampal_2)   |
| 0.00967 | 7.00E-05 | 0.88806 | 0.80288 | (rh.fusiform_7)(rh.insula_4)(rh.parahippocampal_3)(rh.superiortemporal_3)            |
| 0.00967 | 7.00E-05 | 0.88806 | 0.80288 | (rh.fusiform_7)(rh.inferiorparietal_10)(rh.lingual_7)(rh.parahippocampal_3)          |
| 0.00967 | 7.00E-05 | 0.88806 | 0.80288 | (Right-Caudate)(rh.fusiform_7)(rh.parahippocampal_2)(rh.parahippocampal_3)           |
| 0.00967 | 7.00E-05 | 0.88806 | 0.80288 | (Right-Caudate)(rh.fusiform_7)(rh.insula_5)(rh.parahippocampal_3)                    |
| 0.00967 | 7.00E-05 | 0.88806 | 0.80288 | (rh.bankssts_2)(rh.inferiorparietal_4)(rh.inferiorparietal_9)(rh.superiortemporal_3) |
| 0.00967 | 7.00E-05 | 0.88806 | 0.80288 | (Right-Caudate)(rh.inferiorparietal_9)(rh.insula_2)(rh.supramarginal_9)              |
| 0.00967 | 7.00E-05 | 0.88806 | 0.80288 | (rh.fusiform_7)(rh.inferiorparietal_4)(rh.insula_5)(rh.parahippocampal_3)            |
| 0.00967 | 7.00E-05 | 0.88806 | 0.80288 | (rh.inferiorparietal_4)(rh.inferiorparietal_9)(rh.insula_2)(rh.superiortemporal_3)   |
| 0.00967 | 7.00E-05 | 0.88806 | 0.80288 | (rh.inferiorparietal_4)(rh.inferiorparietal_9)(rh.lingual_7)(rh.superiortemporal_3)  |
| 0.00967 | 7.00E-05 | 0.88806 | 0.80288 | (rh.fusiform_7)(rh.precuneus_2)(rh.superiortemporal_1)(rh.superiortemporal_3)        |
| 0.00967 | 7.00E-05 | 0.88806 | 0.80288 | (rh.bankssts_2)(rh.fusiform_7)(rh.inferiorparietal_10)(rh.parahippocampal_3)         |
| 0.00967 | 7.00E-05 | 0.88806 | 0.80288 | (rh.fusiform_7)(rh.inferiorparietal_4)(rh.precuneus_2)(rh.supramarginal_9)           |
| 0.00974 | 7.00E-05 | 0.91045 | 0.83173 | (Right-Pallidum)(rh.bankssts_2)(rh.fusiform_7)(rh.parahippocampal_2)                 |
| 0.00974 | 7.00E-05 | 0.91045 | 0.83173 | (Right-Putamen)(Right-Thalamus-Proper)(rh.fusiform_7)(rh.supramarginal_9)            |
| 0.00974 | 8.00E-05 | 0.91045 | 0.83173 | (rh.inferiorparietal_9)(rh.insula_2)                                                 |
| 0.00974 | 8.00E-05 | 0.91045 | 0.83173 | (Right-Caudate)(Right-Thalamus-Proper)(rh.fusiform_7)(rh.superiortemporal_3)         |
| 0.00974 | 8.00E-05 | 0.91045 | 0.83173 | (Right-Putamen)(Right-Thalamus-Proper)(rh.inferiorparietal_9)(rh.insula_2)           |
| 0.00974 | 8.00E-05 | 0.91045 | 0.83173 | (rh.fusiform_7)(rh.supramarginal_9)                                                  |
| 0.00974 | 8.00E-05 | 0.91045 | 0.83173 | (rh.fusiform_7)(rh.insula_2)(rh.isthmuscingulate_2)(rh.supramarginal_9)              |
| 0.00974 | 8.00E-05 | 0.91045 | 0.83173 | (rh.fusiform_7)(rh.insula_2)(rh.supramarginal_9)                                     |
| 0.00974 | 8.00E-05 | 0.91045 | 0.83173 | (Right-Putamen)(rh.fusiform_7)(rh.supramarginal_9)                                   |
| 0.00974 | 8.00E-05 | 0.91045 | 0.83173 | (rh.fusiform_7)(rh.insula_5)(rh.lingual_7)(rh.superiortemporal_3)                    |
| 0.00974 | 8.00E-05 | 0.91045 | 0.83173 | (Right-Caudate)(rh.fusiform_7)(rh.superiortemporal_3)                                |
| 0.00974 | 8.00E-05 | 0.91045 | 0.83173 | (Right-Putamen)(rh.inferiorparietal_9)(rh.insula_2)                                  |
| 0.00974 | 8.00E-05 | 0.91045 | 0.83173 | (Right-Putamen)(rh.inferiorparietal_9)(rh.insula_2)(rh.isthmuscingulate_2)           |
| 0.00974 | 8.00E-05 | 0.91045 | 0.83173 | (Right-Caudate)(rh.fusiform_7)(rh.insula_2)(rh.superiortemporal_3)                   |
| 0.00974 | 8.00E-05 | 0.91045 | 0.83173 | (Right-Thalamus-Proper)(rh.inferiorparietal_9)(rh.insula_2)                          |
| 0.00974 | 8.00E-05 | 0.91045 | 0.83173 | (Right-Thalamus-Proper)(rh.fusiform_7)(rh.supramarginal_9)                           |
| 0.00974 | 8.00E-05 | 0.91045 | 0.83173 | (Right-Pallidum)(rh.fusiform_7)(rh.lingual_7)(rh.parahippocampal_2)                  |
| 0.00974 | 8.00E-05 | 0.91045 | 0.83173 | (Right-Thalamus-Proper)(rh.inferiorparietal_9)(rh.insula_2)(rh.isthmuscingulate_2)   |
| 0.00974 | 9.00E-05 | 0.91045 | 0.83173 | (rh.inferiorparietal_9)(rh.insula_2)(rh.isthmuscingulate_2)                          |
| 0.00974 | 9.00E-05 | 0.91045 | 0.83173 | (rh.bankssts_2)(rh.fusiform_7)(rh.insula_5)(rh.superiortemporal_3)                   |
| 0.00974 | 9.00E-05 | 0.91045 | 0.83173 | (Right-Putamen)(rh.fusiform_7)(rh.insula_2)(rh.supramarginal_9)                      |
| 0.00974 | 9.00E-05 | 0.91045 | 0.83173 | (Right-Caudate)(Right-Putamen)(rh.fusiform_7)(rh.superiortemporal_3)                 |

|         |          |         |         |                                                                                          |
|---------|----------|---------|---------|------------------------------------------------------------------------------------------|
| 0.00974 | 9.00E-05 | 0.91045 | 0.83173 | (Right-Caudate)(rh.fusiform_7)(rh.isthmuscingulate_2)(rh.superiortemporal_3)             |
| 0.00974 | 9.00E-05 | 0.91045 | 0.83173 | (Right-Thalamus-Proper)(rh.fusiform_7)(rh.isthmuscingulate_2)(rh.supramarginal_9)        |
| 0.00974 | 9.00E-05 | 0.91045 | 0.83173 | (Right-Thalamus-Proper)(rh.fusiform_7)(rh.insula_2)(rh.supramarginal_9)                  |
| 0.00974 | 9.00E-05 | 0.91045 | 0.83173 | (rh.fusiform_7)(rh.isthmuscingulate_2)(rh.supramarginal_9)                               |
| 0.00974 | 9.00E-05 | 0.91045 | 0.83173 | (Right-Putamen)(rh.fusiform_7)(rh.isthmuscingulate_2)(rh.supramarginal_9)                |
| 0.00974 | 9.00E-05 | 0.89179 | 0.80769 | (Right-Pallidum)(rh.fusiform_7)(rh.inferiorparietal_4)(rh.parahippocampal_3)             |
| 0.00974 | 9.00E-05 | 0.89179 | 0.80769 | (rh.bankssts_2)(rh.fusiform_7)(rh.precuneus_2)(rh.superiortemporal_1)                    |
| 0.00974 | 9.00E-05 | 0.89179 | 0.80769 | (rh.bankssts_2)(rh.fusiform_7)(rh.insula_4)(rh.parahippocampal_3)                        |
| 0.00974 | 0.0001   | 0.89179 | 0.80769 | (Right-Caudate)(rh.fusiform_7)(rh.inferiorparietal_4)(rh.precuneus_2)                    |
| 0.00974 | 0.0001   | 0.89179 | 0.80769 | (rh.fusiform_7)(rh.fusiform_8)(rh.lingual_7)(rh.superiortemporal_3)                      |
| 0.00974 | 0.0001   | 0.89179 | 0.80769 | (rh.fusiform_7)(rh.insula_4)(rh.parahippocampal_2)(rh.precuneus_2)                       |
| 0.00974 | 0.0001   | 0.89179 | 0.80769 | (rh.fusiform_7)(rh.insula_4)(rh.insula_5)(rh.parahippocampal_3)                          |
| 0.00974 | 0.0001   | 0.89179 | 0.80769 | (Right-Thalamus-Proper)(rh.fusiform_7)(rh.inferiorparietal_4)(rh.parahippocampal_3)      |
| 0.00974 | 0.0001   | 0.89179 | 0.80769 | (rh.fusiform_7)(rh.inferiorparietal_4)(rh.insula_2)(rh.parahippocampal_3)                |
| 0.00974 | 0.0001   | 0.89179 | 0.80769 | (rh.bankssts_2)(rh.fusiform_7)(rh.fusiform_8)(rh.superiortemporal_3)                     |
| 0.00974 | 0.0001   | 0.89179 | 0.80769 | (Right-Thalamus-Proper)(rh.inferiorparietal_9)(rh.parahippocampal_2)(rh.supramarginal_9) |
| 0.00974 | 0.0001   | 0.89179 | 0.80769 | (rh.fusiform_7)(rh.inferiorparietal_4)(rh.isthmuscingulate_2)(rh.parahippocampal_3)      |
| 0.00974 | 0.0001   | 0.89179 | 0.80769 | (Right-Putamen)(rh.fusiform_7)(rh.inferiorparietal_4)(rh.parahippocampal_3)              |
| 0.00974 | 0.00011  | 0.89179 | 0.80769 | (rh.fusiform_7)(rh.lingual_7)(rh.precuneus_2)(rh.superiortemporal_1)                     |
| 0.00974 | 0.00011  | 0.89179 | 0.80769 | (Right-Putamen)(rh.inferiorparietal_9)(rh.parahippocampal_2)(rh.supramarginal_9)         |
| 0.00974 | 0.00011  | 0.89179 | 0.80769 | (rh.fusiform_7)(rh.inferiorparietal_4)(rh.parahippocampal_3)                             |
| 0.00974 | 0.00011  | 0.89179 | 0.80769 | (rh.fusiform_7)(rh.insula_4)(rh.lingual_7)(rh.parahippocampal_3)                         |
| 0.00974 | 0.00011  | 0.89179 | 0.80769 | (rh.inferiorparietal_9)(rh.isthmuscingulate_2)(rh.parahippocampal_2)(rh.supramarginal_9) |
| 0.00977 | 0.00011  | 0.82463 | 0.72596 | (rh.entorhinal_1)(rh.inferiorparietal_9)(rh.insula_5)(rh.parahippocampal_3)              |
| 0.00977 | 0.00011  | 0.82463 | 0.72596 | (rh.inferiorparietal_9)(rh.lingual_7)(rh.precuneus_2)(rh.superiortemporal_6)             |
| 0.00977 | 0.00011  | 0.82463 | 0.72596 | (rh.bankssts_2)(rh.inferiorparietal_9)(rh.precuneus_2)(rh.superiortemporal_6)            |
| 0.00977 | 0.00011  | 0.82463 | 0.72596 | (rh.fusiform_8)(rh.inferiorparietal_9)(rh.insula_4)(rh.parahippocampal_3)                |
| 0.00977 | 0.00012  | 0.82463 | 0.72596 | (Right-Accumbens-area)(rh.entorhinal_1)(rh.fusiform_7)(rh.supramarginal_9)               |
| 0.00977 | 0.00012  | 0.82463 | 0.72596 | (rh.entorhinal_1)(rh.inferiorparietal_9)(rh.insula_4)(rh.lingual_7)                      |
| 0.00977 | 0.00012  | 0.82463 | 0.72596 | (Right-Caudate)(rh.fusiform_8)(rh.inferiorparietal_9)(rh.parahippocampal_3)              |
| 0.00977 | 0.00012  | 0.82463 | 0.72596 | (rh.bankssts_2)(rh.entorhinal_1)(rh.inferiorparietal_9)(rh.insula_4)                     |
| 0.00977 | 0.00012  | 0.82463 | 0.72596 | (rh.fusiform_8)(rh.inferiorparietal_9)(rh.precuneus_2)(rh.supramarginal_9)               |
| 0.00977 | 0.00012  | 0.82463 | 0.72596 | (Right-Caudate)(rh.fusiform_7)(rh.fusiform_8)(rh.precuneus_4)                            |
| 0.00978 | 0.00013  | 0.89552 | 0.8125  | (Right-Thalamus-Proper)(rh.fusiform_7)(rh.parahippocampal_2)(rh.parahippocampal_3)       |
| 0.00978 | 0.00013  | 0.89552 | 0.8125  | (Right-Pallidum)(rh.inferiorparietal_9)(rh.insula_2)(rh.parahippocampal_2)               |



|         |         |         |         |                                                                                             |
|---------|---------|---------|---------|---------------------------------------------------------------------------------------------|
| 0.00978 | 0.00013 | 0.89552 | 0.8125  | (rh.bankssts_2)(rh.inferiorparietal_10)(rh.inferiorparietal_9)(rh.insula_2)                 |
| 0.00978 | 0.00013 | 0.89552 | 0.8125  | (rh.inferiorparietal_10)(rh.inferiorparietal_9)(rh.insula_2)(rh.lingual_7)                  |
| 0.00978 | 0.00013 | 0.89552 | 0.8125  | (rh.fusiform_7)(rh.insula_2)(rh.precuneus_2)(rh.precuneus_3)                                |
| 0.00978 | 0.00013 | 0.89552 | 0.8125  | (Right-Putamen)(rh.fusiform_7)(rh.precuneus_2)(rh.precuneus_3)                              |
| 0.00978 | 0.00014 | 0.89552 | 0.8125  | (rh.fusiform_7)(rh.isthmuscingulate_2)(rh.precuneus_2)(rh.precuneus_3)                      |
| 0.00978 | 0.00014 | 0.89552 | 0.8125  | (rh.inferiorparietal_9)(rh.insula_2)(rh.isthmuscingulate_2)(rh.supramarginal_9)             |
| 0.00978 | 0.00014 | 0.89552 | 0.8125  | (Right-Thalamus-Proper)(rh.inferiorparietal_9)(rh.insula_2)(rh.supramarginal_9)             |
| 0.00978 | 0.00014 | 0.89552 | 0.8125  | (Right-Putamen)(rh.fusiform_7)(rh.parahippocampal_2)(rh.parahippocampal_3)                  |
| 0.00978 | 0.00014 | 0.89552 | 0.8125  | (rh.fusiform_7)(rh.isthmuscingulate_2)(rh.parahippocampal_2)(rh.parahippocampal_3)          |
| 0.00978 | 0.00014 | 0.89552 | 0.8125  | (rh.fusiform_7)(rh.inferiorparietal_4)(rh.insula_5)(rh.precuneus_2)                         |
| 0.00978 | 0.00015 | 0.89552 | 0.8125  | (rh.fusiform_7)(rh.precuneus_2)(rh.precuneus_3)                                             |
| 0.00978 | 0.00015 | 0.89552 | 0.8125  | (rh.fusiform_7)(rh.insula_2)(rh.parahippocampal_2)(rh.parahippocampal_3)                    |
| 0.00978 | 0.00015 | 0.89552 | 0.8125  | (Right-Pallidum)(rh.fusiform_7)(rh.parahippocampal_2)(rh.parahippocampal_3)                 |
| 0.00978 | 0.00015 | 0.89552 | 0.8125  | (Right-Putamen)(rh.inferiorparietal_9)(rh.insula_2)(rh.supramarginal_9)                     |
| 0.00978 | 0.00016 | 0.89552 | 0.8125  | (Right-Thalamus-Proper)(rh.fusiform_7)(rh.precuneus_2)(rh.precuneus_3)                      |
| 0.00978 | 0.00016 | 0.89552 | 0.8125  | (rh.bankssts_2)(rh.fusiform_7)(rh.fusiform_8)(rh.lingual_7)                                 |
| 0.00978 | 0.00016 | 0.89552 | 0.8125  | (rh.fusiform_7)(rh.parahippocampal_2)(rh.parahippocampal_3)                                 |
| 0.00978 | 0.00016 | 0.89552 | 0.8125  | (rh.fusiform_7)(rh.precuneus_2)(rh.superiortemporal_9)(rh.supramarginal_9)                  |
| 0.00979 | 0.00017 | 0.90672 | 0.82692 | (Right-Caudate)(rh.fusiform_7)(rh.isthmuscingulate_2)(rh.parahippocampal_2)                 |
| 0.00979 | 0.00017 | 0.90672 | 0.82692 | (Right-Pallidum)(rh.fusiform_7)(rh.parahippocampal_2)(rh.superiortemporal_3)                |
| 0.00979 | 0.00017 | 0.90672 | 0.82692 | (Right-Caudate)(Right-Putamen)(rh.fusiform_7)(rh.parahippocampal_2)                         |
| 0.00979 | 0.00018 | 0.90672 | 0.82692 | (Right-Pallidum)(rh.fusiform_7)(rh.lingual_7)(rh.supramarginal_9)                           |
| 0.00979 | 0.00018 | 0.90672 | 0.82692 | (Right-Caudate)(rh.fusiform_7)(rh.insula_2)(rh.parahippocampal_2)                           |
| 0.00979 | 0.00018 | 0.90672 | 0.82692 | (Right-Caudate)(Right-Thalamus-Proper)(rh.fusiform_7)(rh.parahippocampal_2)                 |
| 0.00979 | 0.00019 | 0.90672 | 0.82692 | (Right-Pallidum)(rh.bankssts_2)(rh.fusiform_7)(rh.supramarginal_9)                          |
| 0.00979 | 0.00019 | 0.90672 | 0.82692 | (rh.inferiorparietal_9)(rh.isthmuscingulate_2)(rh.parahippocampal_2)                        |
| 0.00979 | 0.00019 | 0.90672 | 0.82692 | (Right-Caudate)(rh.fusiform_7)(rh.parahippocampal_2)                                        |
| 0.00979 | 0.0002  | 0.90672 | 0.82692 | (Right-Putamen)(rh.inferiorparietal_9)(rh.parahippocampal_2)                                |
| 0.00979 | 0.0002  | 0.90672 | 0.82692 | (Right-Putamen)(rh.inferiorparietal_9)(rh.isthmuscingulate_2)(rh.parahippocampal_2)         |
| 0.00979 | 0.0002  | 0.90672 | 0.82692 | (Right-Thalamus-Proper)(rh.inferiorparietal_9)(rh.parahippocampal_2)                        |
| 0.00979 | 0.00021 | 0.90672 | 0.82692 | (rh.parahippocampal_2)(rh.precuneus_2)(rh.precuneus_4)(rh.superiortemporal_3)               |
| 0.00979 | 0.00021 | 0.90672 | 0.82692 | (rh.inferiorparietal_9)(rh.parahippocampal_2)                                               |
| 0.00979 | 0.00022 | 0.90672 | 0.82692 | (Right-Putamen)(Right-Thalamus-Proper)(rh.inferiorparietal_9)(rh.parahippocampal_2)         |
| 0.00979 | 0.00022 | 0.90672 | 0.82692 | (Right-Thalamus-Proper)(rh.inferiorparietal_9)(rh.isthmuscingulate_2)(rh.parahippocampal_2) |
| 0.00981 | 0.00023 | 0.89925 | 0.81731 | (rh.fusiform_7)(rh.insula_2)(rh.parahippocampal_2)(rh.supramarginal_9)                      |

|         |         |         |         |                                                                                       |
|---------|---------|---------|---------|---------------------------------------------------------------------------------------|
| 0.00981 | 0.00023 | 0.89925 | 0.81731 | (Right-Putamen)(rh.fusiform_7)(rh.parahippocampal_2)(rh.supramarginal_9)              |
| 0.00981 | 0.00024 | 0.89925 | 0.81731 | (rh.fusiform_7)(rh.parahippocampal_3)(rh.superiortemporal_9)                          |
| 0.00981 | 0.00024 | 0.89925 | 0.81731 | (Right-Thalamus-Proper)(rh.fusiform_7)(rh.parahippocampal_2)(rh.supramarginal_9)      |
| 0.00981 | 0.00025 | 0.89925 | 0.81731 | (Right-Pallidum)(Right-Thalamus-Proper)(rh.inferiorparietal_9)(rh.precuneus_2)        |
| 0.00981 | 0.00026 | 0.89925 | 0.81731 | (Right-Thalamus-Proper)(rh.fusiform_7)(rh.parahippocampal_3)(rh.superiortemporal_9)   |
| 0.00981 | 0.00026 | 0.89925 | 0.81731 | (Right-Caudate)(rh.inferiorparietal_9)(rh.isthmuscingulate_2)(rh.parahippocampal_2)   |
| 0.00981 | 0.00027 | 0.89925 | 0.81731 | (Right-Putamen)(rh.fusiform_7)(rh.parahippocampal_3)(rh.superiortemporal_9)           |
| 0.00981 | 0.00028 | 0.89925 | 0.81731 | (Right-Pallidum)(Right-Putamen)(rh.inferiorparietal_9)(rh.precuneus_2)                |
| 0.00981 | 0.00029 | 0.89925 | 0.81731 | (Right-Caudate)(rh.fusiform_7)(rh.precuneus_2)(rh.superiortemporal_9)                 |
| 0.00981 | 0.00029 | 0.89925 | 0.81731 | (Right-Pallidum)(rh.inferiorparietal_9)(rh.superiortemporal_3)                        |
| 0.00981 | 0.0003  | 0.89925 | 0.81731 | (Right-Pallidum)(rh.inferiorparietal_9)(rh.isthmuscingulate_2)(rh.superiortemporal_3) |
| 0.00981 | 0.00031 | 0.89925 | 0.81731 | (Right-Pallidum)(rh.fusiform_7)(rh.inferiorparietal_10)(rh.precuneus_2)               |
| 0.00981 | 0.00032 | 0.89925 | 0.81731 | (Right-Pallidum)(rh.inferiorparietal_9)(rh.isthmuscingulate_2)(rh.precuneus_2)        |
| 0.00981 | 0.00033 | 0.89925 | 0.81731 | (Right-Caudate)(rh.bankssts_2)(rh.inferiorparietal_9)(rh.insula_2)                    |
| 0.00981 | 0.00034 | 0.89925 | 0.81731 | (Right-Pallidum)(rh.inferiorparietal_9)(rh.precuneus_2)                               |
| 0.00981 | 0.00036 | 0.89925 | 0.81731 | (rh.bankssts_2)(rh.inferiorparietal_9)(rh.lingual_7)(rh.supramarginal_9)              |
| 0.00981 | 0.00037 | 0.89925 | 0.81731 | (Right-Pallidum)(rh.fusiform_7)(rh.inferiorparietal_4)(rh.precuneus_2)                |
| 0.00981 | 0.00038 | 0.89925 | 0.81731 | (Right-Pallidum)(Right-Putamen)(rh.inferiorparietal_9)(rh.superiortemporal_3)         |
| 0.00981 | 0.0004  | 0.89925 | 0.81731 | (Right-Caudate)(Right-Putamen)(rh.inferiorparietal_9)(rh.parahippocampal_2)           |
| 0.00981 | 0.00042 | 0.89925 | 0.81731 | (Right-Caudate)(Right-Thalamus-Proper)(rh.inferiorparietal_9)(rh.parahippocampal_2)   |
| 0.00981 | 0.00043 | 0.89925 | 0.81731 | (Right-Pallidum)(rh.fusiform_7)(rh.parahippocampal_3)(rh.superiortemporal_9)          |
| 0.00981 | 0.00045 | 0.89925 | 0.81731 | (rh.fusiform_7)(rh.insula_2)(rh.parahippocampal_3)(rh.superiortemporal_9)             |
| 0.00981 | 0.00048 | 0.89925 | 0.81731 | (rh.fusiform_7)(rh.isthmuscingulate_2)(rh.parahippocampal_2)(rh.supramarginal_9)      |
| 0.00981 | 0.0005  | 0.89925 | 0.81731 | (rh.fusiform_7)(rh.parahippocampal_2)(rh.supramarginal_9)                             |
| 0.00981 | 0.00053 | 0.89925 | 0.81731 | (rh.fusiform_7)(rh.isthmuscingulate_2)(rh.parahippocampal_3)(rh.superiortemporal_9)   |
| 0.00981 | 0.00056 | 0.89925 | 0.81731 | (Right-Pallidum)(Right-Thalamus-Proper)(rh.inferiorparietal_9)(rh.superiortemporal_3) |
| 0.00981 | 0.00059 | 0.90299 | 0.82212 | (Right-Pallidum)(rh.fusiform_7)(rh.superiortemporal_3)(rh.supramarginal_9)            |
| 0.00981 | 0.00063 | 0.90299 | 0.82212 | (rh.fusiform_7)(rh.insula_2)(rh.insula_4)(rh.precuneus_2)                             |
| 0.00981 | 0.00067 | 0.90299 | 0.82212 | (Right-Thalamus-Proper)(rh.fusiform_7)(rh.insula_4)(rh.precuneus_2)                   |
| 0.00981 | 0.00071 | 0.90299 | 0.82212 | (Right-Caudate)(rh.fusiform_7)(rh.isthmuscingulate_2)(rh.supramarginal_9)             |
| 0.00981 | 0.00077 | 0.90299 | 0.82212 | (Right-Caudate)(rh.fusiform_7)(rh.supramarginal_9)                                    |
| 0.00981 | 0.00083 | 0.90299 | 0.82212 | (Right-Putamen)(rh.fusiform_7)(rh.insula_4)(rh.precuneus_2)                           |
| 0.00981 | 0.00091 | 0.90299 | 0.82212 | (Right-Caudate)(Right-Thalamus-Proper)(rh.fusiform_7)(rh.supramarginal_9)             |
| 0.00981 | 0.001   | 0.90299 | 0.82212 | (Right-Pallidum)(rh.fusiform_7)(rh.insula_4)(rh.precuneus_2)                          |
| 0.00981 | 0.00111 | 0.90299 | 0.82212 | (rh.fusiform_7)(rh.insula_4)(rh.isthmuscingulate_2)(rh.precuneus_2)                   |

|         |         |         |         |                                                                             |
|---------|---------|---------|---------|-----------------------------------------------------------------------------|
| 0.00981 | 0.00125 | 0.90299 | 0.82212 | (rh.fusiform_7)(rh.insula_5)(rh.precuneus_2)(rh.superiortemporal_9)         |
| 0.00981 | 0.00143 | 0.90299 | 0.82212 | (Right-Caudate)(Right-Putamen)(rh.fusiform_7)(rh.supramarginal_9)           |
| 0.00981 | 0.00167 | 0.90299 | 0.82212 | (Right-Caudate)(rh.fusiform_7)(rh.insula_2)(rh.supramarginal_9)             |
| 0.00981 | 0.002   | 0.90299 | 0.82212 | (rh.fusiform_7)(rh.insula_4)(rh.precuneus_2)                                |
| 0.00991 | 0.0025  | 0.99254 | 0.95673 | (rh.bankssts_2)(rh.lingual_7)(rh.superiortemporal_3)                        |
| 0.00991 | 0.00333 | 0.99254 | 0.95673 | (rh.bankssts_2)(rh.isthmuscingulate_2)(rh.lingual_7)(rh.superiortemporal_3) |
| 0.00991 | 0.005   | 0.99254 | 0.95673 | (Right-Thalamus-Proper)(rh.bankssts_2)(rh.lingual_7)(rh.superiortemporal_3) |
| 0.00991 | 0.01    | 0.99254 | 0.95673 | (Right-Putamen)(rh.bankssts_2)(rh.lingual_7)(rh.superiortemporal_3)         |









al\_3)



ral\_3)

9)













)

al\_3)





3)

9)

l\_3)

)















\_3)  
i\_3)





al\_3)

al\_3)

al\_3)









9)

\_3)







3)

al\_3)

9)





al\_9)

ial\_3)

al\_3)

al\_3)



al\_3)











9)

3)

al\_2)
