# Supplementary material for: Good neighbors, bad neighbors: the frequent network neighborhood mapping of the hippocampus enlightens several structural factors of the human intelligence on a 414-subject cohort
Source: PubMed Central journal article supplement (PMC7371878; doi:10.1038/s41598-020-68914-2), 2020-07-20
Supplement: 41598_2020_68914_MOESM4_ESM.pdf [file 41598_2020_68914_MOESM4_ESM.pdf]

| p-value | Holm-Bonferroni | frequency_upper | frequency_lower | name                                                                                       |
|---------|-----------------|-----------------|-----------------|--------------------------------------------------------------------------------------------|
| 0.00236 | 1.00E-05        | 0.71831         | 0.83654         | (rh.inferiorparietal_4)(rh.middletemporal_1)(rh.parahippocampal_1)(rh.precuneus_3)         |
| 0.00286 | 1.00E-05        | 0.73239         | 0.84615         | (rh.middletemporal_1)(rh.parahippocampal_1)(rh.precuneus_3)                                |
| 0.0033  | 1.00E-05        | 0.71127         | 0.82692         | (rh.inferiorparietal_10)(rh.middletemporal_1)(rh.parahippocampal_1)(rh.precuneus_3)        |
| 0.00442 | 1.00E-05        | 0.73239         | 0.84135         | (rh.lingual_7)(rh.middletemporal_1)(rh.parahippocampal_1)(rh.precuneus_3)                  |
| 0.00455 | 1.00E-05        | 0.77985         | 0.87981         | (rh.inferiorparietal_4)(rh.lingual_5)(rh.middletemporal_1)                                 |
| 0.00455 | 1.00E-05        | 0.77985         | 0.87981         | (Right-Thalamus-Propri)(rh.inferiorparietal_4)(rh.lingual_5)(rh.middletemporal_1)          |
| 0.00455 | 1.00E-05        | 0.77985         | 0.87981         | (Right-Putamen)(rh.inferiorparietal_4)(rh.lingual_5)(rh.middletemporal_1)                  |
| 0.00455 | 1.00E-05        | 0.77985         | 0.87981         | (rh.inferiorparietal_4)(rh.isthmuscingulate_2)(rh.lingual_5)(rh.middletemporal_1)          |
| 0.00484 | 1.00E-05        | 0.77465         | 0.875           | (rh.inferiorparietal_4)(rh.middletemporal_1)(rh.precuneus_3)(rh.superiortemporal_1)        |
| 0.00552 | 1.00E-05        | 0.71831         | 0.82692         | (rh.middletemporal_1)(rh.parahippocampal_1)(rh.precuneus_3)(rh.supramarginal_9)            |
| 0.00567 | 1.00E-05        | 0.78873         | 0.88462         | (rh.inferiorparietal_10)(rh.inferiorparietal_4)(rh.middletemporal_1)(rh.precuneus_3)       |
| 0.0057  | 1.00E-05        | 0.76493         | 0.86538         | (Right-Putamen)(rh.lingual_5)(rh.middletemporal_1)(rh.precuneus_3)                         |
| 0.0057  | 1.00E-05        | 0.76493         | 0.86538         | (rh.isthmuscingulate_2)(rh.lingual_5)(rh.middletemporal_1)(rh.precuneus_3)                 |
| 0.0057  | 1.00E-05        | 0.76493         | 0.86538         | (Right-Thalamus-Propri)(rh.lingual_5)(rh.middletemporal_1)(rh.precuneus_3)                 |
| 0.00592 | 1.00E-05        | 0.75373         | 0.85577         | (Right-Pallidum)(rh.lingual_5)(rh.middletemporal_1)(rh.precuneus_3)                        |
| 0.00637 | 1.00E-05        | 0.76056         | 0.86058         | (rh.inferiorparietal_4)(rh.lingual_5)(rh.middletemporal_1)(rh.precuneus_3)                 |
| 0.0064  | 1.00E-05        | 0.77239         | 0.87019         | (Right-Pallidum)(rh.inferiorparietal_4)(rh.lingual_5)(rh.middletemporal_1)                 |
| 0.00704 | 2.00E-05        | 0.73881         | 0.84135         | (rh.lingual_5)(rh.middletemporal_1)(rh.precuneus_3)(rh.superiortemporal_1)                 |
| 0.00718 | 2.00E-05        | 0.77985         | 0.875           | (rh.bankssts_2)(rh.inferiorparietal_4)(rh.lingual_5)(rh.middletemporal_1)                  |
| 0.00718 | 2.00E-05        | 0.77985         | 0.875           | (rh.inferiorparietal_4)(rh.lingual_5)(rh.lingual_7)(rh.middletemporal_1)                   |
| 0.00737 | 2.00E-05        | 0.73944         | 0.84135         | (rh.inferiorparietal_10)(rh.inferiorparietal_4)(rh.middletemporal_1)(rh.parahippocampal_1) |
| 0.00751 | 2.00E-05        | 0.76866         | 0.86538         | (Right-Caudate)(rh.inferiorparietal_4)(rh.lingual_5)(rh.middletemporal_1)                  |
| 0.00816 | 2.00E-05        | 0.72388         | 0.82692         | (rh.lingual_5)(rh.middletemporal_1)(rh.superiortemporal_1)(rh.superiortemporal_9)          |
| 0.00823 | 2.00E-05        | 0.78169         | 0.875           | (rh.inferiorparietal_10)(rh.parahippocampal_1)(rh.precuneus_3)(rh.superiortemporal_1)      |
| 0.00876 | 3.00E-05        | 0.76493         | 0.86058         | (rh.bankssts_2)(rh.lingual_5)(rh.middletemporal_1)(rh.precuneus_3)                         |
| 0.00876 | 3.00E-05        | 0.76493         | 0.86058         | (rh.lingual_5)(rh.lingual_7)(rh.middletemporal_1)(rh.precuneus_3)                          |
| 0.00893 | 3.00E-05        | 0.78873         | 0.87981         | (rh.insula_2)(rh.parahippocampal_1)(rh.precuneus_3)(rh.superiortemporal_1)                 |
| 0.00893 | 3.00E-05        | 0.78873         | 0.87981         | (rh.inferiorparietal_4)(rh.parahippocampal_1)(rh.precuneus_3)(rh.superiortemporal_1)       |
| 0.009   | 3.00E-05        | 0.75373         | 0.85096         | (Right-Caudate)(rh.lingual_5)(rh.middletemporal_1)(rh.precuneus_3)                         |
| 0.00966 | 7.00E-05        | 0.79577         | 0.88462         | (Right-Pallidum)(rh.parahippocampal_1)(rh.precuneus_3)(rh.superiortemporal_1)              |
| 0.0097  | 7.00E-05        | 0.76056         | 0.85577         | (rh.inferiorparietal_4)(rh.middletemporal_1)(rh.parahippocampal_1)                         |

.1)
