# Supplementary material for: Good neighbors, bad neighbors: the frequent network neighborhood mapping of the hippocampus enlightens several structural factors of the human intelligence on a 414-subject cohort
Source: PubMed Central journal article supplement (PMC7371878; doi:10.1038/s41598-020-68914-2), 2020-07-20
Supplement: 41598_2020_68914_MOESM5_ESM.pdf [file 41598_2020_68914_MOESM5_ESM.pdf]

| p-value  | Holm-Bonferroni | frequency_upper | frequency_lower | name                                                                                  |
|----------|-----------------|-----------------|-----------------|---------------------------------------------------------------------------------------|
| 5.00E-05 | 0               | 0.97388         | 0.87981         | (lh.inferiorparietal_5)(lh.isthmuscingulate_2)(rh.precuneus_2)(rh.superiortemporal_3) |
| 9.00E-05 | 0               | 0.91791         | 0.79327         | (lh.isthmuscingulate_2)(rh.bankssts_2)(rh.fusiform_7)(rh.precuneus_2)                 |
| 9.00E-05 | 0               | 0.91791         | 0.79327         | (lh.isthmuscingulate_2)(rh.fusiform_7)(rh.lingual_7)(rh.precuneus_2)                  |
| 9.00E-05 | 0               | 0.91418         | 0.78846         | (lh.isthmuscingulate_2)(rh.fusiform_7)(rh.precuneus_2)(rh.superiortemporal_3)         |
| 0.00011  | 0               | 0.94776         | 0.84135         | (Left-Caudate)(lh.inferiorparietal_5)(lh.superiortemporal_3)(rh.precuneus_2)          |
| 0.00011  | 0               | 0.98507         | 0.90865         | (lh.isthmuscingulate_2)(rh.lingual_7)(rh.precuneus_2)(rh.superiortemporal_3)          |
| 0.00011  | 0               | 0.98507         | 0.90865         | (lh.isthmuscingulate_2)(rh.bankssts_2)(rh.precuneus_2)(rh.superiortemporal_3)         |
| 0.00012  | 0               | 0.92537         | 0.80769         | (Left-Caudate)(lh.isthmuscingulate_2)(lh.transversetemporal_2)(rh.superiortemporal_3) |
| 0.00013  | 0               | 0.94403         | 0.83654         | (Left-Caudate)(lh.inferiorparietal_5)(lh.isthmuscingulate_2)(rh.superiortemporal_3)   |
| 0.00013  | 0               | 0.94403         | 0.83654         | (Left-Caudate)(lh.inferiorparietal_5)(lh.isthmuscingulate_2)(lh.superiortemporal_3)   |
| 0.00014  | 0               | 0.91791         | 0.79808         | (lh.isthmuscingulate_2)(rh.fusiform_7)(rh.insula_2)(rh.precuneus_2)                   |
| 0.00014  | 0               | 0.91791         | 0.79808         | (lh.isthmuscingulate_2)(lh.superiortemporal_2)(rh.fusiform_7)(rh.precuneus_2)         |
| 0.00014  | 0               | 0.91791         | 0.79808         | (lh.isthmuscingulate_2)(lh.isthmuscingulate_3)(rh.fusiform_7)(rh.precuneus_2)         |
| 0.00014  | 0               | 0.91791         | 0.79808         | (Right-Thalamus-Proper)(lh.isthmuscingulate_2)(rh.fusiform_7)(rh.precuneus_2)         |
| 0.00014  | 0               | 0.91791         | 0.79808         | (lh.isthmuscingulate_2)(rh.fusiform_7)(rh.isthmuscingulate_2)(rh.precuneus_2)         |
| 0.00014  | 0               | 0.91791         | 0.79808         | (lh.isthmuscingulate_2)(rh.fusiform_7)(rh.precuneus_2)                                |
| 0.00014  | 0               | 0.91791         | 0.79808         | (Right-Putamen)(lh.isthmuscingulate_2)(rh.fusiform_7)(rh.precuneus_2)                 |
| 0.00014  | 0               | 0.91791         | 0.79808         | (Left-Thalamus-Proper)(lh.isthmuscingulate_2)(rh.fusiform_7)(rh.precuneus_2)          |
| 0.00014  | 0               | 0.91791         | 0.79808         | (Left-Putamen)(lh.isthmuscingulate_2)(rh.fusiform_7)(rh.precuneus_2)                  |
| 0.00015  | 0               | 0.95522         | 0.85577         | (Left-Caudate)(lh.isthmuscingulate_2)(rh.parahippocampal_2)(rh.precuneus_2)           |
| 0.00015  | 0               | 0.95522         | 0.85577         | (Left-Caudate)(lh.isthmuscingulate_2)(rh.insula_2)(rh.precuneus_2)                    |
| 0.00017  | 0               | 0.97388         | 0.88942         | (lh.isthmuscingulate_2)(rh.parahippocampal_2)(rh.precuneus_2)(rh.superiortemporal_3)  |
| 0.00017  | 0               | 0.98134         | 0.90385         | (Left-Putamen)(lh.inferiorparietal_5)(lh.isthmuscingulate_2)(rh.precuneus_2)          |
| 0.00019  | 0               | 0.96269         | 0.87019         | (Left-Caudate)(lh.isthmuscingulate_2)(rh.bankssts_2)(rh.precuneus_2)                  |
| 0.00019  | 0               | 0.9291          | 0.81731         | (Left-Caudate)(lh.superiortemporal_3)(lh.transversetemporal_2)(rh.precuneus_2)        |
| 0.00021  | 0               | 0.92537         | 0.8125          | (Left-Caudate)(lh.isthmuscingulate_2)(lh.superiortemporal_3)(lh.transversetemporal_2) |
| 0.00022  | 0               | 0.97015         | 0.88462         | (lh.inferiorparietal_5)(lh.isthmuscingulate_2)(lh.superiortemporal_3)(rh.precuneus_2) |
| 0.00022  | 0               | 0.95896         | 0.86538         | (Left-Caudate)(lh.superiortemporal_3)(rh.bankssts_2)(rh.precuneus_2)                  |
| 0.00022  | 0               | 0.98507         | 0.91346         | (Right-Putamen)(lh.isthmuscingulate_2)(rh.precuneus_2)(rh.superiortemporal_3)         |
| 0.00022  | 0               | 0.98507         | 0.91346         | (lh.isthmuscingulate_2)(rh.precuneus_2)(rh.superiortemporal_3)                        |
| 0.00022  | 0               | 0.98507         | 0.91346         | (Left-Putamen)(lh.isthmuscingulate_2)(rh.precuneus_2)(rh.superiortemporal_3)          |
| 0.00022  | 0               | 0.98507         | 0.91346         | (Right-Thalamus-Proper)(lh.isthmuscingulate_2)(rh.precuneus_2)(rh.superiortemporal_3) |
| 0.00022  | 0               | 0.98507         | 0.91346         | (Left-Thalamus-Proper)(lh.isthmuscingulate_2)(rh.precuneus_2)(rh.superiortemporal_3)  |

|         |   |         |         |                                                                                       |
|---------|---|---------|---------|---------------------------------------------------------------------------------------|
| 0.00022 | 0 | 0.98507 | 0.91346 | (lh.isthmuscingulate_2)(lh.superiortemporal_2)(rh.precuneus_2)(rh.superiortemporal_3) |
| 0.00022 | 0 | 0.98507 | 0.91346 | (lh.isthmuscingulate_2)(lh.isthmuscingulate_3)(rh.precuneus_2)(rh.superiortemporal_3) |
| 0.00022 | 0 | 0.98507 | 0.91346 | (lh.isthmuscingulate_2)(rh.isthmuscingulate_2)(rh.precuneus_2)(rh.superiortemporal_3) |
| 0.00022 | 0 | 0.94403 | 0.84135 | (Left-Caudate)(lh.inferiorparietal_5)(lh.superiortemporal_3)(rh.parahippocampal_2)    |
| 0.00026 | 0 | 0.95522 | 0.86058 | (Left-Caudate)(Left-Putamen)(lh.isthmuscingulate_2)(lh.superiortemporal_3)            |
| 0.00028 | 0 | 0.93657 | 0.83173 | (Left-Caudate)(lh.inferiorparietal_5)(lh.isthmuscingulate_2)(lh.parahippocampal_3)    |
| 0.00028 | 0 | 0.93657 | 0.83173 | (Left-Caudate)(lh.fusiform_7)(lh.superiortemporal_2)(rh.precuneus_2)                  |
| 0.00028 | 0 | 0.90672 | 0.78846 | (rh.inferiorparietal_9)(rh.lingual_7)(rh.precuneus_2)(rh.superiortemporal_3)          |
| 0.00028 | 0 | 0.90672 | 0.78846 | (rh.bankssts_2)(rh.inferiorparietal_9)(rh.precuneus_2)(rh.superiortemporal_3)         |
| 0.00028 | 0 | 0.90672 | 0.78846 | (lh.superiortemporal_2)(rh.inferiorparietal_9)(rh.precuneus_2)(rh.superiortemporal_3) |
| 0.00029 | 0 | 0.90299 | 0.78365 | (lh.isthmuscingulate_2)(lh.parahippocampal_3)(rh.fusiform_7)(rh.precuneus_2)          |
| 0.0003  | 0 | 0.93284 | 0.82692 | (Left-Caudate)(lh.fusiform_7)(lh.isthmuscingulate_2)(rh.isthmuscingulate_2)           |
| 0.0003  | 0 | 0.93284 | 0.82692 | (Left-Caudate)(lh.fusiform_7)(lh.isthmuscingulate_2)(lh.superiortemporal_2)           |
| 0.0003  | 0 | 0.93284 | 0.82692 | (Left-Caudate)(Left-Putamen)(lh.fusiform_7)(lh.isthmuscingulate_2)                    |
| 0.0003  | 0 | 0.93284 | 0.82692 | (Left-Caudate)(Left-Thalamus-Proper)(lh.fusiform_7)(lh.isthmuscingulate_2)            |
| 0.0003  | 0 | 0.95149 | 0.85577 | (Left-Caudate)(Left-Putamen)(lh.inferiorparietal_5)(lh.superiortemporal_3)            |
| 0.0003  | 0 | 0.95149 | 0.85577 | (Left-Caudate)(Left-Putamen)(lh.inferiorparietal_5)(lh.isthmuscingulate_2)            |
| 0.0003  | 0 | 0.95149 | 0.85577 | (Left-Caudate)(rh.parahippocampal_2)(rh.precuneus_2)(rh.superiortemporal_3)           |
| 0.0003  | 0 | 0.95149 | 0.85577 | (Left-Caudate)(lh.inferiorparietal_5)(lh.superiortemporal_3)(rh.bankssts_2)           |
| 0.00031 | 0 | 0.97388 | 0.89423 | (lh.inferiorparietal_5)(lh.isthmuscingulate_2)(rh.insula_2)(rh.precuneus_2)           |
| 0.00032 | 0 | 0.98134 | 0.90865 | (lh.inferiorparietal_5)(lh.isthmuscingulate_2)(rh.lingual_7)(rh.precuneus_2)          |
| 0.00032 | 0 | 0.98134 | 0.90865 | (lh.isthmuscingulate_2)(rh.insula_2)(rh.precuneus_2)(rh.superiortemporal_3)           |
| 0.00032 | 0 | 0.98134 | 0.90865 | (lh.inferiorparietal_5)(lh.isthmuscingulate_2)(rh.bankssts_2)(rh.precuneus_2)         |
| 0.00033 | 0 | 0.9291  | 0.82212 | (Left-Caudate)(lh.superiortemporal_3)(lh.transversetemporal_2)(rh.superiortemporal_3) |
| 0.00033 | 0 | 0.9291  | 0.82212 | (Left-Caudate)(lh.fusiform_7)(lh.isthmuscingulate_2)(rh.superiortemporal_3)           |
| 0.00033 | 0 | 0.99254 | 0.93269 | (Left-Putamen)(lh.isthmuscingulate_2)(rh.bankssts_2)(rh.precuneus_2)                  |
| 0.00033 | 0 | 0.99254 | 0.93269 | (Left-Putamen)(lh.isthmuscingulate_2)(rh.lingual_7)(rh.precuneus_2)                   |
| 0.00033 | 0 | 0.96269 | 0.875   | (lh.fusiform_7)(lh.isthmuscingulate_2)(rh.bankssts_2)(rh.precuneus_2)                 |
| 0.00033 | 0 | 0.96269 | 0.875   | (Left-Caudate)(lh.isthmuscingulate_2)(lh.superiortemporal_2)(rh.precuneus_2)          |
| 0.00033 | 0 | 0.96269 | 0.875   | (Left-Caudate)(lh.isthmuscingulate_2)(lh.isthmuscingulate_3)(rh.precuneus_2)          |
| 0.00033 | 0 | 0.96269 | 0.875   | (lh.fusiform_7)(lh.isthmuscingulate_2)(rh.lingual_7)(rh.precuneus_2)                  |
| 0.00033 | 0 | 0.96269 | 0.875   | (Left-Caudate)(lh.isthmuscingulate_2)(rh.precuneus_2)                                 |
| 0.00033 | 0 | 0.96269 | 0.875   | (Left-Caudate)(Right-Putamen)(lh.isthmuscingulate_2)(rh.precuneus_2)                  |
| 0.00033 | 0 | 0.96269 | 0.875   | (Left-Caudate)(lh.isthmuscingulate_2)(rh.isthmuscingulate_2)(rh.precuneus_2)          |
