# Supplementary material for: Good neighbors, bad neighbors: the frequent network neighborhood mapping of the hippocampus enlightens several structural factors of the human intelligence on a 414-subject cohort
Source: PubMed Central journal article supplement (PMC7371878; doi:10.1038/s41598-020-68914-2), 2020-07-20
Supplement: 41598_2020_68914_MOESM6_ESM.pdf [file 41598_2020_68914_MOESM6_ESM.pdf]

| p-value | Holm-Bonferroni | frequency_upper | frequency_lower | name                                                                  |
|---------|-----------------|-----------------|-----------------|-----------------------------------------------------------------------|
| 0.00131 | 0               | 0.89437         | 0.97115         | (lh.bankssts_3)(lh.fusiform_5)(lh.isthmuscingulate_3)(rh.precuneus_3) |
| 0.00131 | 0               | 0.89437         | 0.97115         | (Right-Thalamus-Proper)(lh.bankssts_3)(lh.fusiform_5)(rh.precuneus_3) |
| 0.00131 | 0               | 0.89437         | 0.97115         | (lh.bankssts_3)(lh.fusiform_5)(rh.precuneus_3)                        |
| 0.00131 | 0               | 0.89437         | 0.97115         | (lh.bankssts_3)(lh.fusiform_5)(rh.lingual_7)(rh.precuneus_3)          |
| 0.00131 | 0               | 0.89437         | 0.97115         | (Right-Putamen)(lh.bankssts_3)(lh.fusiform_5)(rh.precuneus_3)         |
| 0.00296 | 0               | 0.89437         | 0.96635         | (lh.bankssts_3)(lh.fusiform_5)(rh.bankssts_2)(rh.precuneus_3)         |
| 0.00296 | 0               | 0.89437         | 0.96635         | (Right-Thalamus-Proper)(lh.bankssts_3)(lh.fusiform_5)(lh.insula_1)    |
| 0.00296 | 0               | 0.89437         | 0.96635         | (Right-Putamen)(lh.bankssts_3)(lh.fusiform_5)(lh.insula_1)            |
| 0.00296 | 0               | 0.89437         | 0.96635         | (lh.bankssts_3)(lh.fusiform_5)(lh.insula_1)(lh.isthmuscingulate_3)    |
| 0.00296 | 0               | 0.89437         | 0.96635         | (lh.bankssts_3)(lh.fusiform_5)(lh.insula_1)                           |
| 0.00296 | 0               | 0.89437         | 0.96635         | (lh.bankssts_3)(lh.fusiform_5)(lh.insula_1)(rh.lingual_7)             |
| 0.00311 | 0               | 0.88732         | 0.96154         | (Right-Pallidum)(lh.bankssts_3)(lh.fusiform_5)(rh.precuneus_3)        |
| 0.00328 | 0               | 0.87324         | 0.95192         | (Right-Thalamus-Proper)(lh.bankssts_3)(lh.insula_1)(rh.precuneus_3)   |
| 0.00328 | 0               | 0.87324         | 0.95192         | (lh.bankssts_3)(lh.insula_1)(rh.lingual_7)(rh.precuneus_3)            |
| 0.00328 | 0               | 0.87324         | 0.95192         | (lh.bankssts_3)(lh.fusiform_5)(lh.insula_1)(lh.lingual_8)             |
| 0.00328 | 0               | 0.87324         | 0.95192         | (Right-Putamen)(lh.bankssts_3)(lh.insula_1)(rh.precuneus_3)           |
| 0.00328 | 0               | 0.87324         | 0.95192         | (lh.bankssts_3)(lh.insula_1)(lh.isthmuscingulate_3)(rh.precuneus_3)   |
| 0.00328 | 0               | 0.87324         | 0.95192         | (lh.bankssts_3)(lh.insula_1)(rh.precuneus_3)                          |
| 0.00328 | 0               | 0.87324         | 0.95192         | (lh.bankssts_3)(lh.fusiform_5)(lh.insula_1)(rh.inferiorparietal_4)    |
| 0.00617 | 0               | 0.8662          | 0.94231         | (lh.bankssts_3)(lh.insula_1)(lh.lingual_8)(rh.inferiorparietal_4)     |
| 0.00617 | 0               | 0.8662          | 0.94231         | (Right-Pallidum)(lh.bankssts_3)(lh.insula_1)(rh.precuneus_3)          |
| 0.00617 | 0               | 0.89437         | 0.96154         | (Right-Caudate)(lh.bankssts_3)(lh.fusiform_5)(rh.precuneus_3)         |
| 0.00617 | 0               | 0.89437         | 0.96154         | (lh.bankssts_3)(lh.fusiform_5)(lh.lingual_8)(rh.inferiorparietal_4)   |
| 0.00617 | 0               | 0.89437         | 0.96154         | (lh.bankssts_3)(lh.fusiform_5)(lh.insula_1)(rh.bankssts_2)            |
| 0.00627 | 0               | 0.87324         | 0.94712         | (lh.bankssts_3)(lh.insula_1)(rh.bankssts_2)(rh.precuneus_3)           |
| 0.00629 | 1.00E-05        | 0.88732         | 0.95673         | (Right-Thalamus-Proper)(lh.bankssts_3)(lh.lingual_8)(rh.precuneus_3)  |
| 0.00629 | 1.00E-05        | 0.88732         | 0.95673         | (lh.bankssts_3)(lh.lingual_8)(rh.lingual_7)(rh.precuneus_3)           |
| 0.00629 | 1.00E-05        | 0.88732         | 0.95673         | (lh.bankssts_3)(lh.lingual_8)(rh.precuneus_3)                         |
| 0.00629 | 1.00E-05        | 0.88732         | 0.95673         | (Right-Pallidum)(lh.bankssts_3)(lh.fusiform_5)(lh.insula_1)           |
| 0.00629 | 1.00E-05        | 0.88732         | 0.95673         | (Right-Putamen)(lh.bankssts_3)(lh.lingual_8)(rh.precuneus_3)          |
| 0.00629 | 1.00E-05        | 0.88732         | 0.95673         | (lh.bankssts_3)(rh.inferiorparietal_4)(rh.precuneus_3)                |
| 0.00629 | 1.00E-05        | 0.88732         | 0.95673         | (lh.bankssts_3)(lh.isthmuscingulate_3)(lh.lingual_8)(rh.precuneus_3)  |
