# Supplementary material for: Good neighbors, bad neighbors: the frequent network neighborhood mapping of the hippocampus enlightens several structural factors of the human intelligence on a 414-subject cohort
Source: PubMed Central journal article supplement (PMC7371878; doi:10.1038/s41598-020-68914-2), 2020-07-20
Supplement: 41598_2020_68914_MOESM7_ESM.pdf [file 41598_2020_68914_MOESM7_ESM.pdf]

| p-value | Holm-Bonferroni | frequency_upper | frequency_lower | name |
|---------|-----------------|-----------------|-----------------|------|
|---------|-----------------|-----------------|-----------------|------|
