# Supplementary material for: Good neighbors, bad neighbors: the frequent network neighborhood mapping of the hippocampus enlightens several structural factors of the human intelligence on a 414-subject cohort
Source: PubMed Central journal article supplement (PMC7371878; doi:10.1038/s41598-020-68914-2), 2020-07-20
Supplement: 41598_2020_68914_MOESM8_ESM.pdf [file 41598_2020_68914_MOESM8_ESM.pdf]

| p-value  | Holm-Bonferroni | frequency_upper | frequency_lower | name                                                                                        |
|----------|-----------------|-----------------|-----------------|---------------------------------------------------------------------------------------------|
| 4.00E-05 | 1.00E-05        | 0.6787          | 0.84422         | (lh.inferiorparietal_4)(lh.inferiorparietal_5)(lh.precuneus_11)(lh.supramarginal_1)         |
| 5.00E-05 | 1.00E-05        | 0.67509         | 0.8392          | (lh.inferiorparietal_4)(lh.precuneus_11)(lh.superiortemporal_3)(lh.supramarginal_1)         |
| 6.00E-05 | 1.00E-05        | 0.68231         | 0.84422         | (lh.inferiorparietal_4)(lh.insula_2)(lh.precuneus_11)(lh.supramarginal_1)                   |
| 6.00E-05 | 1.00E-05        | 0.66426         | 0.82915         | (Left-Pallidum)(lh.inferiorparietal_4)(lh.precuneus_11)(lh.supramarginal_1)                 |
| 6.00E-05 | 1.00E-05        | 0.68953         | 0.84925         | (Left-Putamen)(lh.inferiorparietal_4)(lh.precuneus_11)(lh.supramarginal_1)                  |
| 9.00E-05 | 1.00E-05        | 0.69314         | 0.84925         | (Left-Thalamus-Proper)(lh.inferiorparietal_4)(lh.precuneus_11)(lh.supramarginal_1)          |
| 9.00E-05 | 1.00E-05        | 0.69314         | 0.84925         | (lh.inferiorparietal_4)(lh.precuneus_11)(lh.supramarginal_1)                                |
| 9.00E-05 | 1.00E-05        | 0.69314         | 0.84925         | (lh.inferiorparietal_4)(lh.precuneus_11)(lh.superiortemporal_2)(lh.supramarginal_1)         |
| 9.00E-05 | 1.00E-05        | 0.69314         | 0.84925         | (lh.inferiorparietal_4)(lh.isthmuscingulate_3)(lh.precuneus_11)(lh.supramarginal_1)         |
| 9.00E-05 | 1.00E-05        | 0.67509         | 0.83417         | (lh.inferiorparietal_4)(lh.inferiorparietal_5)(lh.superiortemporal_3)(lh.supramarginal_1)   |
| 0.0001   | 1.00E-05        | 0.68231         | 0.8392          | (lh.inferiorparietal_4)(lh.inferiorparietal_5)(lh.insula_2)(lh.supramarginal_1)             |
| 0.0001   | 1.00E-05        | 0.68231         | 0.8392          | (lh.inferiorparietal_4)(lh.lingual_8)(lh.precuneus_11)(lh.supramarginal_1)                  |
| 0.0001   | 1.00E-05        | 0.68231         | 0.8392          | (lh.inferiorparietal_4)(lh.lingual_6)(lh.precuneus_11)(lh.supramarginal_1)                  |
| 0.0001   | 1.00E-05        | 0.66426         | 0.82412         | (lh.inferiorparietal_4)(lh.precuneus_11)(lh.supramarginal_1)(lh.transversetemporal_2)       |
| 0.0001   | 1.00E-05        | 0.66426         | 0.82412         | (Left-Pallidum)(lh.inferiorparietal_4)(lh.inferiorparietal_5)(lh.supramarginal_1)           |
| 0.00011  | 1.00E-05        | 0.68953         | 0.84422         | (Left-Putamen)(lh.inferiorparietal_4)(lh.inferiorparietal_5)(lh.supramarginal_1)            |
| 0.00015  | 1.00E-05        | 0.69314         | 0.84422         | (lh.inferiorparietal_4)(lh.inferiorparietal_5)(lh.superiortemporal_2)(lh.supramarginal_1)   |
| 0.00015  | 1.00E-05        | 0.69314         | 0.84422         | (lh.inferiorparietal_4)(lh.inferiorparietal_5)(lh.supramarginal_1)                          |
| 0.00015  | 1.00E-05        | 0.69314         | 0.84422         | (Left-Thalamus-Proper)(lh.inferiorparietal_4)(lh.inferiorparietal_5)(lh.supramarginal_1)    |
| 0.00015  | 1.00E-05        | 0.69314         | 0.84422         | (lh.inferiorparietal_4)(lh.inferiorparietal_5)(lh.isthmuscingulate_3)(lh.supramarginal_1)   |
| 0.00016  | 1.00E-05        | 0.67509         | 0.82915         | (Left-Pallidum)(lh.inferiorparietal_4)(lh.insula_2)(lh.supramarginal_1)                     |
| 0.00016  | 1.00E-05        | 0.67509         | 0.82915         | (lh.bankssts_3)(lh.inferiorparietal_4)(lh.precuneus_11)(lh.supramarginal_1)                 |
| 0.00017  | 1.00E-05        | 0.68231         | 0.83417         | (lh.inferiorparietal_4)(lh.isthmuscingulate_2)(lh.precuneus_11)(lh.supramarginal_1)         |
| 0.00017  | 1.00E-05        | 0.68231         | 0.83417         | (lh.inferiorparietal_4)(lh.inferiorparietal_5)(lh.lingual_6)(lh.supramarginal_1)            |
| 0.00017  | 1.00E-05        | 0.68231         | 0.83417         | (lh.inferiorparietal_4)(lh.inferiorparietal_5)(lh.lingual_8)(lh.supramarginal_1)            |
| 0.00018  | 1.00E-05        | 0.66426         | 0.8191          | (lh.inferiorparietal_4)(lh.inferiorparietal_5)(lh.supramarginal_1)(lh.transversetemporal_2) |
| 0.00019  | 1.00E-05        | 0.68953         | 0.8392          | (lh.inferiorparietal_4)(lh.superiortemporal_2)(lh.superiortemporal_3)(lh.supramarginal_1)   |
| 0.00019  | 1.00E-05        | 0.68953         | 0.8392          | (Left-Thalamus-Proper)(lh.inferiorparietal_4)(lh.superiortemporal_3)(lh.supramarginal_1)    |
| 0.00019  | 1.00E-05        | 0.68953         | 0.8392          | (lh.inferiorparietal_4)(lh.isthmuscingulate_3)(lh.superiortemporal_3)(lh.supramarginal_1)   |
| 0.00019  | 1.00E-05        | 0.68953         | 0.8392          | (lh.fusiform_5)(lh.inferiorparietal_4)(lh.precuneus_11)(lh.supramarginal_1)                 |
| 0.00019  | 1.00E-05        | 0.68953         | 0.8392          | (Left-Putamen)(lh.inferiorparietal_4)(lh.superiortemporal_3)(lh.supramarginal_1)            |
| 0.00019  | 1.00E-05        | 0.68953         | 0.8392          | (lh.inferiorparietal_4)(lh.superiortemporal_3)(lh.supramarginal_1)                          |
| 0.0002   | 1.00E-05        | 0.67148         | 0.82412         | (lh.inferiorparietal_4)(lh.parahippocampal_3)(lh.precuneus_11)(lh.supramarginal_1)          |
| 0.00021  | 1.00E-05        | 0.69675         | 0.84422         | (lh.inferiorparietal_4)(lh.insula_2)(lh.supramarginal_1)                                    |
| 0.00021  | 1.00E-05        | 0.69675         | 0.84422         | (Left-Putamen)(lh.inferiorparietal_4)(lh.insula_2)(lh.supramarginal_1)                      |

|         |          |         |         |                                                                                           |
|---------|----------|---------|---------|-------------------------------------------------------------------------------------------|
| 0.00021 | 1.00E-05 | 0.69675 | 0.84422 | (lh.inferiorparietal_4)(lh.insula_2)(lh.superiortemporal_2)(lh.supramarginal_1)           |
| 0.00021 | 1.00E-05 | 0.69675 | 0.84422 | (Left-Thalamus-Proper)(lh.inferiorparietal_4)(lh.insula_2)(lh.supramarginal_1)            |
| 0.00021 | 1.00E-05 | 0.69675 | 0.84422 | (lh.inferiorparietal_4)(lh.insula_2)(lh.isthmuscingulate_3)(lh.supramarginal_1)           |
| 0.00022 | 1.00E-05 | 0.6787  | 0.82915 | (lh.inferiorparietal_4)(lh.lingual_8)(lh.superiortemporal_3)(lh.supramarginal_1)          |
| 0.00022 | 1.00E-05 | 0.6787  | 0.82915 | (Left-Pallidum)(lh.inferiorparietal_4)(lh.supramarginal_1)                                |
| 0.00022 | 1.00E-05 | 0.6787  | 0.82915 | (Left-Pallidum)(lh.inferiorparietal_4)(lh.isthmuscingulate_3)(lh.supramarginal_1)         |
| 0.00022 | 1.00E-05 | 0.6787  | 0.82915 | (lh.inferiorparietal_4)(lh.lingual_6)(lh.superiortemporal_3)(lh.supramarginal_1)          |
| 0.00022 | 1.00E-05 | 0.6787  | 0.82915 | (Left-Pallidum)(lh.inferiorparietal_4)(lh.superiortemporal_2)(lh.supramarginal_1)         |
| 0.00022 | 1.00E-05 | 0.6787  | 0.82915 | (Left-Pallidum)(Left-Putamen)(lh.inferiorparietal_4)(lh.supramarginal_1)                  |
| 0.00022 | 1.00E-05 | 0.6787  | 0.82915 | (Left-Pallidum)(Left-Thalamus-Proper)(lh.inferiorparietal_4)(lh.supramarginal_1)          |
| 0.00023 | 1.00E-05 | 0.70397 | 0.84925 | (Left-Putamen)(Left-Thalamus-Proper)(lh.inferiorparietal_4)(lh.supramarginal_1)           |
| 0.00023 | 1.00E-05 | 0.70397 | 0.84925 | (Left-Putamen)(lh.inferiorparietal_4)(lh.isthmuscingulate_3)(lh.supramarginal_1)          |
| 0.00023 | 1.00E-05 | 0.70397 | 0.84925 | (Left-Putamen)(lh.inferiorparietal_4)(lh.superiortemporal_2)(lh.supramarginal_1)          |
| 0.00023 | 1.00E-05 | 0.70397 | 0.84925 | (Left-Putamen)(lh.inferiorparietal_4)(lh.supramarginal_1)                                 |
| 0.00024 | 1.00E-05 | 0.68592 | 0.83417 | (lh.inferiorparietal_4)(lh.insula_2)(lh.lingual_8)(lh.supramarginal_1)                    |
| 0.00024 | 1.00E-05 | 0.68592 | 0.83417 | (lh.inferiorparietal_4)(lh.insula_2)(lh.lingual_6)(lh.supramarginal_1)                    |
| 0.00024 | 1.00E-05 | 0.68592 | 0.83417 | (lh.inferiorparietal_4)(lh.insula_2)(lh.superiortemporal_3)(lh.supramarginal_1)           |
| 0.00024 | 1.00E-05 | 0.66787 | 0.8191  | (Left-Pallidum)(lh.inferiorparietal_4)(lh.lingual_8)(lh.supramarginal_1)                  |
| 0.00024 | 1.00E-05 | 0.66787 | 0.8191  | (Left-Pallidum)(lh.inferiorparietal_4)(lh.lingual_6)(lh.supramarginal_1)                  |
| 0.00026 | 1.00E-05 | 0.69314 | 0.8392  | (Left-Putamen)(lh.inferiorparietal_4)(lh.lingual_6)(lh.supramarginal_1)                   |
| 0.00026 | 1.00E-05 | 0.69314 | 0.8392  | (Left-Putamen)(lh.inferiorparietal_4)(lh.lingual_8)(lh.supramarginal_1)                   |
| 0.00027 | 1.00E-05 | 0.65704 | 0.80905 | (Left-Caudate)(lh.inferiorparietal_4)(lh.precuneus_11)(lh.supramarginal_1)                |
| 0.00027 | 1.00E-05 | 0.67509 | 0.82412 | (lh.bankssts_3)(lh.inferiorparietal_4)(lh.inferiorparietal_5)(lh.supramarginal_1)         |
| 0.00027 | 1.00E-05 | 0.67509 | 0.82412 | (Left-Putamen)(lh.inferiorparietal_4)(lh.supramarginal_1)(lh.transversetemporal_2)        |
| 0.0003  | 1.00E-05 | 0.68231 | 0.82915 | (lh.inferiorparietal_4)(lh.inferiorparietal_5)(lh.isthmuscingulate_2)(lh.supramarginal_1) |
| 0.00031 | 1.00E-05 | 0.70758 | 0.84925 | (Left-Thalamus-Proper)(lh.inferiorparietal_4)(lh.superiortemporal_2)(lh.supramarginal_1)  |
| 0.00031 | 1.00E-05 | 0.70758 | 0.84925 | (lh.inferiorparietal_4)(lh.superiortemporal_2)(lh.supramarginal_1)                        |
| 0.00031 | 1.00E-05 | 0.70758 | 0.84925 | (lh.inferiorparietal_4)(lh.isthmuscingulate_3)(lh.superiortemporal_2)(lh.supramarginal_1) |
| 0.00031 | 1.00E-05 | 0.70758 | 0.84925 | (Left-Thalamus-Proper)(lh.inferiorparietal_4)(lh.isthmuscingulate_3)(lh.supramarginal_1)  |
| 0.00031 | 1.00E-05 | 0.70758 | 0.84925 | (Left-Thalamus-Proper)(lh.inferiorparietal_4)(lh.supramarginal_1)                         |
| 0.00032 | 1.00E-05 | 0.68953 | 0.83417 | (lh.fusiform_5)(lh.inferiorparietal_4)(lh.inferiorparietal_5)(lh.supramarginal_1)         |
| 0.00033 | 1.00E-05 | 0.67148 | 0.8191  | (Left-Pallidum)(lh.inferiorparietal_4)(lh.superiortemporal_3)(lh.supramarginal_1)         |
| 0.00033 | 1.00E-05 | 0.67148 | 0.8191  | (lh.inferiorparietal_4)(lh.inferiorparietal_5)(lh.parahippocampal_3)(lh.supramarginal_1)  |
| 0.00033 | 1.00E-05 | 0.67148 | 0.8191  | (lh.bankssts_3)(lh.inferiorparietal_4)(lh.superiortemporal_3)(lh.supramarginal_1)         |
| 0.00035 | 1.00E-05 | 0.79422 | 0.91457 | (lh.inferiorparietal_4)(lh.inferiorparietal_5)(lh.lingual_6)(lh.precuneus_11)             |
| 0.00036 | 1.00E-05 | 0.69675 | 0.8392  | (lh.inferiorparietal_4)(lh.lingual_8)(lh.superiortemporal_2)(lh.supramarginal_1)          |

|         |          |         |         |                                                                                             |
|---------|----------|---------|---------|---------------------------------------------------------------------------------------------|
| 0.00036 | 1.00E-05 | 0.69675 | 0.8392  | (lh.inferiorparietal_4)(lh.lingual_6)(lh.supramarginal_1)                                   |
| 0.00036 | 1.00E-05 | 0.69675 | 0.8392  | (lh.inferiorparietal_4)(lh.isthmuscingulate_3)(lh.lingual_6)(lh.supramarginal_1)            |
| 0.00036 | 1.00E-05 | 0.69675 | 0.8392  | (Left-Thalamus-Proper)(lh.inferiorparietal_4)(lh.lingual_8)(lh.supramarginal_1)             |
| 0.00036 | 1.00E-05 | 0.69675 | 0.8392  | (lh.inferiorparietal_4)(lh.isthmuscingulate_3)(lh.lingual_8)(lh.supramarginal_1)            |
| 0.00036 | 1.00E-05 | 0.69675 | 0.8392  | (Left-Thalamus-Proper)(lh.inferiorparietal_4)(lh.lingual_6)(lh.supramarginal_1)             |
| 0.00036 | 1.00E-05 | 0.69675 | 0.8392  | (lh.inferiorparietal_4)(lh.lingual_6)(lh.superiortemporal_2)(lh.supramarginal_1)            |
| 0.00036 | 1.00E-05 | 0.69675 | 0.8392  | (lh.inferiorparietal_4)(lh.lingual_8)(lh.supramarginal_1)                                   |
| 0.00036 | 1.00E-05 | 0.80144 | 0.9196  | (lh.inferiorparietal_4)(lh.inferiorparietal_5)(lh.insula_2)(lh.precuneus_11)                |
| 0.00036 | 1.00E-05 | 0.66065 | 0.80905 | (Left-Pallidum)(lh.bankssts_3)(lh.inferiorparietal_4)(lh.supramarginal_1)                   |
| 0.00036 | 1.00E-05 | 0.80866 | 0.92462 | (Left-Putamen)(lh.inferiorparietal_4)(lh.inferiorparietal_5)(lh.precuneus_11)               |
| 0.00036 | 1.00E-05 | 0.6787  | 0.82412 | (lh.inferiorparietal_4)(lh.isthmuscingulate_2)(lh.superiortemporal_3)(lh.supramarginal_1)   |
| 0.00036 | 1.00E-05 | 0.6787  | 0.82412 | (lh.inferiorparietal_4)(lh.isthmuscingulate_3)(lh.supramarginal_1)(lh.transversetemporal_2) |
| 0.00036 | 1.00E-05 | 0.6787  | 0.82412 | (lh.inferiorparietal_4)(lh.superiortemporal_2)(lh.supramarginal_1)(lh.transversetemporal_2) |
| 0.00036 | 1.00E-05 | 0.6787  | 0.82412 | (Left-Thalamus-Proper)(lh.inferiorparietal_4)(lh.supramarginal_1)(lh.transversetemporal_2)  |
| 0.00036 | 1.00E-05 | 0.6787  | 0.82412 | (lh.bankssts_3)(lh.inferiorparietal_4)(lh.insula_2)(lh.supramarginal_1)                     |
| 0.00036 | 1.00E-05 | 0.6787  | 0.82412 | (lh.inferiorparietal_4)(lh.supramarginal_1)(lh.transversetemporal_2)                        |
| 0.0004  | 1.00E-05 | 0.68592 | 0.82915 | (lh.inferiorparietal_4)(lh.insula_2)(lh.isthmuscingulate_2)(lh.supramarginal_1)             |
| 0.0004  | 1.00E-05 | 0.68592 | 0.82915 | (lh.fusiform_5)(lh.inferiorparietal_4)(lh.superiortemporal_3)(lh.supramarginal_1)           |
| 0.0004  | 1.00E-05 | 0.68592 | 0.82915 | (Left-Putamen)(lh.bankssts_3)(lh.inferiorparietal_4)(lh.supramarginal_1)                    |
| 0.0004  | 1.00E-05 | 0.66787 | 0.81407 | (Left-Pallidum)(lh.inferiorparietal_4)(lh.isthmuscingulate_2)(lh.supramarginal_1)           |
| 0.00044 | 1.00E-05 | 0.65704 | 0.80402 | (Left-Caudate)(lh.inferiorparietal_4)(lh.inferiorparietal_5)(lh.supramarginal_1)            |
| 0.00044 | 1.00E-05 | 0.69314 | 0.83417 | (Left-Putamen)(lh.inferiorparietal_4)(lh.isthmuscingulate_2)(lh.supramarginal_1)            |
| 0.00044 | 1.00E-05 | 0.69314 | 0.83417 | (lh.fusiform_5)(lh.inferiorparietal_4)(lh.insula_2)(lh.supramarginal_1)                     |
| 0.00044 | 1.00E-05 | 0.69314 | 0.83417 | (lh.fusiform_5)(lh.inferiorparietal_4)(lh.lingual_8)(lh.supramarginal_1)                    |
| 0.00044 | 1.00E-05 | 0.67509 | 0.8191  | (lh.inferiorparietal_4)(lh.parahippocampal_3)(lh.superiortemporal_3)(lh.supramarginal_1)    |
| 0.00044 | 1.00E-05 | 0.67509 | 0.8191  | (Left-Pallidum)(lh.fusiform_5)(lh.inferiorparietal_4)(lh.supramarginal_1)                   |
| 0.00046 | 1.00E-05 | 0.78339 | 0.90452 | (Left-Pallidum)(lh.inferiorparietal_4)(lh.inferiorparietal_5)(lh.precuneus_11)              |
| 0.00048 | 1.00E-05 | 0.70036 | 0.8392  | (Left-Putamen)(lh.fusiform_5)(lh.inferiorparietal_4)(lh.supramarginal_1)                    |
| 0.00054 | 1.00E-05 | 0.68953 | 0.82915 | (lh.bankssts_3)(lh.inferiorparietal_4)(lh.isthmuscingulate_3)(lh.supramarginal_1)           |
| 0.00054 | 1.00E-05 | 0.68953 | 0.82915 | (Left-Thalamus-Proper)(lh.bankssts_3)(lh.inferiorparietal_4)(lh.supramarginal_1)            |
| 0.00054 | 1.00E-05 | 0.68953 | 0.82915 | (lh.inferiorparietal_4)(lh.lingual_6)(lh.lingual_8)(lh.supramarginal_1)                     |
| 0.00054 | 1.00E-05 | 0.68953 | 0.82915 | (lh.bankssts_3)(lh.inferiorparietal_4)(lh.supramarginal_1)                                  |
| 0.00054 | 1.00E-05 | 0.68953 | 0.82915 | (lh.bankssts_3)(lh.inferiorparietal_4)(lh.superiortemporal_2)(lh.supramarginal_1)           |
| 0.00059 | 1.00E-05 | 0.66065 | 0.80402 | (lh.bankssts_3)(lh.inferiorparietal_4)(lh.supramarginal_1)(lh.transversetemporal_2)         |
| 0.00059 | 1.00E-05 | 0.69675 | 0.83417 | (Left-Thalamus-Proper)(lh.inferiorparietal_4)(lh.isthmuscingulate_2)(lh.supramarginal_1)    |
| 0.00059 | 1.00E-05 | 0.69675 | 0.83417 | (lh.inferiorparietal_4)(lh.isthmuscingulate_2)(lh.superiortemporal_2)(lh.supramarginal_1)   |

|         |          |         |         |                                                                                          |
|---------|----------|---------|---------|------------------------------------------------------------------------------------------|
| 0.0006  | 1.00E-05 | 0.6787  | 0.8191  | (lh.bankssts_3)(lh.inferiorparietal_4)(lh.lingual_8)(lh.supramarginal_1)                 |
| 0.0006  | 1.00E-05 | 0.6787  | 0.8191  | (lh.bankssts_3)(lh.inferiorparietal_4)(lh.lingual_6)(lh.supramarginal_1)                 |
| 0.0006  | 1.00E-05 | 0.6787  | 0.8191  | (lh.inferiorparietal_4)(lh.insula_2)(lh.parahippocampal_3)(lh.supramarginal_1)           |
| 0.00065 | 1.00E-05 | 0.70397 | 0.8392  | (lh.fusiform_5)(lh.inferiorparietal_4)(lh.superiortemporal_2)(lh.supramarginal_1)        |
| 0.00065 | 1.00E-05 | 0.70397 | 0.8392  | (lh.fusiform_5)(lh.inferiorparietal_4)(lh.supramarginal_1)                               |
| 0.00065 | 1.00E-05 | 0.70397 | 0.8392  | (Left-Thalamus-Proper)(lh.fusiform_5)(lh.inferiorparietal_4)(lh.supramarginal_1)         |
| 0.00065 | 1.00E-05 | 0.70397 | 0.8392  | (lh.fusiform_5)(lh.inferiorparietal_4)(lh.isthmuscingulate_3)(lh.supramarginal_1)        |
| 0.00065 | 1.00E-05 | 0.66787 | 0.80905 | (Left-Caudate)(Left-Putamen)(lh.inferiorparietal_4)(lh.supramarginal_1)                  |
| 0.00066 | 1.00E-05 | 0.68592 | 0.82412 | (lh.inferiorparietal_4)(lh.parahippocampal_3)(lh.superiortemporal_2)(lh.supramarginal_1) |
| 0.00066 | 1.00E-05 | 0.68592 | 0.82412 | (lh.inferiorparietal_4)(lh.isthmuscingulate_2)(lh.lingual_8)(lh.supramarginal_1)         |
| 0.00066 | 1.00E-05 | 0.68592 | 0.82412 | (lh.inferiorparietal_4)(lh.insula_1)(lh.precuneus_11)(lh.supramarginal_1)                |
| 0.00066 | 1.00E-05 | 0.68592 | 0.82412 | (lh.inferiorparietal_4)(lh.isthmuscingulate_2)(lh.lingual_6)(lh.supramarginal_1)         |
| 0.00066 | 1.00E-05 | 0.68592 | 0.82412 | (lh.inferiorparietal_4)(lh.parahippocampal_3)(lh.supramarginal_1)                        |
| 0.00066 | 1.00E-05 | 0.68592 | 0.82412 | (lh.inferiorparietal_4)(lh.isthmuscingulate_3)(lh.parahippocampal_3)(lh.supramarginal_1) |
| 0.00066 | 1.00E-05 | 0.68592 | 0.82412 | (Left-Putamen)(lh.inferiorparietal_4)(lh.parahippocampal_3)(lh.supramarginal_1)          |
| 0.00066 | 1.00E-05 | 0.68592 | 0.82412 | (Left-Thalamus-Proper)(lh.inferiorparietal_4)(lh.parahippocampal_3)(lh.supramarginal_1)  |
| 0.00068 | 1.00E-05 | 0.72924 | 0.8593  | (lh.inferiorparietal_4)(lh.inferiorparietal_5)(lh.precuneus_11)(lh.superiortemporal_8)   |
| 0.00068 | 1.00E-05 | 0.80144 | 0.91457 | (lh.inferiorparietal_4)(lh.inferiorparietal_5)(lh.lingual_8)(lh.precuneus_11)            |
| 0.00071 | 1.00E-05 | 0.81588 | 0.92462 | (lh.inferiorparietal_4)(lh.inferiorparietal_5)(lh.isthmuscingulate_3)(lh.precuneus_11)   |
| 0.00071 | 1.00E-05 | 0.81588 | 0.92462 | (Left-Thalamus-Proper)(lh.inferiorparietal_4)(lh.inferiorparietal_5)(lh.precuneus_11)    |
| 0.00071 | 1.00E-05 | 0.81588 | 0.92462 | (lh.inferiorparietal_4)(lh.inferiorparietal_5)(lh.precuneus_11)                          |
| 0.00072 | 1.00E-05 | 0.67509 | 0.81407 | (lh.inferiorparietal_4)(lh.lingual_8)(lh.parahippocampal_3)(lh.supramarginal_1)          |
| 0.00072 | 1.00E-05 | 0.67509 | 0.81407 | (lh.inferiorparietal_4)(lh.lingual_6)(lh.parahippocampal_3)(lh.supramarginal_1)          |
| 0.00072 | 1.00E-05 | 0.69314 | 0.82915 | (lh.fusiform_5)(lh.inferiorparietal_4)(lh.lingual_6)(lh.supramarginal_1)                 |
| 0.00072 | 1.00E-05 | 0.69314 | 0.82915 | (lh.fusiform_5)(lh.inferiorparietal_4)(lh.isthmuscingulate_2)(lh.supramarginal_1)        |
| 0.00074 | 1.00E-05 | 0.78873 | 0.90452 | (Left-Putamen)(lh.bankssts_3)(lh.inferiorparietal_4)(lh.inferiorparietal_5)              |
| 0.00076 | 1.00E-05 | 0.79577 | 0.90955 | (Left-Putamen)(lh.bankssts_3)(lh.inferiorparietal_4)(lh.precuneus_11)                    |
| 0.00078 | 1.00E-05 | 0.66426 | 0.80402 | (Left-Pallidum)(lh.inferiorparietal_4)(lh.parahippocampal_3)(lh.supramarginal_1)         |
| 0.00083 | 1.00E-05 | 0.78339 | 0.8995  | (lh.inferiorparietal_4)(lh.inferiorparietal_5)(lh.precuneus_11)(lh.transversetemporal_2) |
| 0.00087 | 1.00E-05 | 0.67148 | 0.80905 | (Left-Caudate)(lh.inferiorparietal_4)(lh.superiortemporal_2)(lh.supramarginal_1)         |
| 0.00087 | 1.00E-05 | 0.67148 | 0.80905 | (Left-Caudate)(lh.inferiorparietal_4)(lh.supramarginal_1)                                |
| 0.00087 | 1.00E-05 | 0.67148 | 0.80905 | (Left-Caudate)(lh.inferiorparietal_4)(lh.isthmuscingulate_3)(lh.supramarginal_1)         |
| 0.00087 | 1.00E-05 | 0.67148 | 0.80905 | (Left-Caudate)(Left-Thalamus-Proper)(lh.inferiorparietal_4)(lh.supramarginal_1)          |
| 0.00091 | 1.00E-05 | 0.79783 | 0.90955 | (lh.inferiorparietal_4)(lh.inferiorparietal_5)(lh.insula_2)(lh.lingual_6)                |
| 0.00091 | 1.00E-05 | 0.79783 | 0.90955 | (lh.inferiorparietal_4)(lh.inferiorparietal_5)(lh.precuneus_11)(lh.superiortemporal_3)   |
| 0.00094 | 1.00E-05 | 0.80505 | 0.91457 | (Left-Putamen)(lh.inferiorparietal_4)(lh.inferiorparietal_5)(lh.lingual_6)               |

|         |          |         |         |                                                                                          |
|---------|----------|---------|---------|------------------------------------------------------------------------------------------|
| 0.00094 | 1.00E-05 | 0.80505 | 0.91457 | (lh.inferiorparietal_4)(lh.insula_2)(lh.lingual_6)(lh.precuneus_11)                      |
| 0.00096 | 1.00E-05 | 0.6787  | 0.81407 | (lh.bankssts_3)(lh.inferiorparietal_4)(lh.isthmuscingulate_2)(lh.supramarginal_1)        |
| 0.00097 | 1.00E-05 | 0.81227 | 0.9196  | (Left-Putamen)(lh.inferiorparietal_4)(lh.lingual_6)(lh.precuneus_11)                     |
| 0.00106 | 1.00E-05 | 0.68592 | 0.8191  | (lh.bankssts_3)(lh.fusiform_5)(lh.inferiorparietal_4)(lh.supramarginal_1)                |
| 0.00106 | 1.00E-05 | 0.74729 | 0.86935 | (lh.inferiorparietal_4)(lh.inferiorparietal_5)(lh.lingual_7)(lh.precuneus_11)            |
| 0.00109 | 1.00E-05 | 0.90614 | 0.9799  | (Left-Putamen)(lh.inferiorparietal_5)(lh.lingual_6)(lh.precuneus_11)                     |
| 0.00113 | 1.00E-05 | 0.88087 | 0.96482 | (Left-Putamen)(lh.inferiorparietal_5)(lh.precuneus_11)(lh.transversetemporal_2)          |
| 0.00115 | 1.00E-05 | 0.67509 | 0.80905 | (lh.inferiorparietal_4)(lh.isthmuscingulate_2)(lh.parahippocampal_3)(lh.supramarginal_1) |
| 0.00117 | 1.00E-05 | 0.76761 | 0.88442 | (Left-Pallidum)(lh.bankssts_3)(lh.inferiorparietal_4)(lh.inferiorparietal_5)             |
| 0.00122 | 1.00E-05 | 0.77465 | 0.88945 | (Left-Pallidum)(lh.bankssts_3)(lh.inferiorparietal_4)(lh.precuneus_11)                   |
| 0.00127 | 1.00E-05 | 0.68231 | 0.81407 | (lh.inferiorparietal_4)(lh.insula_1)(lh.superiortemporal_3)(lh.supramarginal_1)          |
| 0.00127 | 1.00E-05 | 0.68231 | 0.81407 | (lh.fusiform_5)(lh.inferiorparietal_4)(lh.parahippocampal_3)(lh.supramarginal_1)         |
| 0.00129 | 1.00E-05 | 0.89892 | 0.97487 | (lh.inferiorparietal_5)(lh.insula_2)(lh.lingual_6)(lh.precuneus_11)                      |
| 0.00129 | 1.00E-05 | 0.86643 | 0.95477 | (lh.inferiorparietal_5)(lh.lingual_6)(lh.precuneus_11)(lh.transversetemporal_2)          |
| 0.0013  | 1.00E-05 | 0.76895 | 0.88442 | (lh.inferiorparietal_5)(lh.precuneus_11)(lh.superiortemporal_3)(lh.supramarginal_1)      |
| 0.00132 | 1.00E-05 | 0.78873 | 0.8995  | (lh.bankssts_3)(lh.inferiorparietal_4)(lh.inferiorparietal_5)(lh.insula_2)               |
| 0.00133 | 1.00E-05 | 0.81588 | 0.9196  | (lh.inferiorparietal_4)(lh.inferiorparietal_5)(lh.precuneus_11)(lh.superiortemporal_2)   |
| 0.00136 | 1.00E-05 | 0.79577 | 0.90452 | (lh.bankssts_3)(lh.inferiorparietal_4)(lh.inferiorparietal_5)(lh.precuneus_11)           |
| 0.00136 | 1.00E-05 | 0.79577 | 0.90452 | (lh.bankssts_3)(lh.inferiorparietal_4)(lh.insula_2)(lh.precuneus_11)                     |
| 0.00139 | 1.00E-05 | 0.72563 | 0.84925 | (lh.inferiorparietal_4)(lh.inferiorparietal_5)(lh.lingual_6)(lh.superiortemporal_8)      |
| 0.00141 | 1.00E-05 | 0.68953 | 0.8191  | (lh.inferiorparietal_4)(lh.insula_1)(lh.insula_2)(lh.supramarginal_1)                    |
| 0.00141 | 1.00E-05 | 0.68953 | 0.8191  | (lh.inferiorparietal_4)(lh.inferiorparietal_5)(lh.insula_1)(lh.supramarginal_1)          |
| 0.00143 | 1.00E-05 | 0.7509  | 0.86935 | (lh.inferiorparietal_5)(lh.precuneus_11)(lh.supramarginal_1)(lh.transversetemporal_2)    |
| 0.00144 | 1.00E-05 | 0.9278  | 0.98995 | (Left-Putamen)(Left-Thalamus-Proper)(lh.inferiorparietal_5)(lh.precuneus_11)             |
| 0.00144 | 1.00E-05 | 0.9278  | 0.98995 | (Left-Putamen)(lh.inferiorparietal_5)(lh.precuneus_11)                                   |
| 0.00144 | 1.00E-05 | 0.9278  | 0.98995 | (Left-Putamen)(lh.inferiorparietal_5)(lh.isthmuscingulate_3)(lh.precuneus_11)            |
| 0.00151 | 1.00E-05 | 0.73285 | 0.85427 | (lh.inferiorparietal_4)(lh.lingual_6)(lh.precuneus_11)(lh.superiortemporal_8)            |
| 0.00155 | 1.00E-05 | 0.79061 | 0.8995  | (lh.inferiorparietal_4)(lh.inferiorparietal_5)(lh.parahippocampal_3)(lh.precuneus_11)    |
| 0.00155 | 1.00E-05 | 0.69675 | 0.82412 | (Left-Putamen)(lh.inferiorparietal_4)(lh.insula_1)(lh.supramarginal_1)                   |
| 0.00163 | 1.00E-05 | 0.79783 | 0.90452 | (Left-Pallidum)(lh.inferiorparietal_4)(lh.inferiorparietal_5)(lh.insula_2)               |
| 0.0017  | 1.00E-05 | 0.80505 | 0.90955 | (lh.inferiorparietal_4)(lh.inferiorparietal_5)(lh.insula_2)(lh.lingual_8)                |
| 0.0017  | 1.00E-05 | 0.80505 | 0.90955 | (Left-Pallidum)(lh.inferiorparietal_4)(lh.insula_2)(lh.precuneus_11)                     |
| 0.00174 | 1.00E-05 | 0.87726 | 0.9598  | (lh.inferiorparietal_5)(lh.insula_2)(lh.precuneus_11)(lh.transversetemporal_2)           |
| 0.00177 | 1.00E-05 | 0.81227 | 0.91457 | (Left-Putamen)(lh.inferiorparietal_4)(lh.inferiorparietal_5)(lh.lingual_8)               |
| 0.00177 | 1.00E-05 | 0.81227 | 0.91457 | (lh.fusiform_5)(lh.inferiorparietal_4)(lh.inferiorparietal_5)(lh.precuneus_11)           |
| 0.00177 | 1.00E-05 | 0.81227 | 0.91457 | (lh.inferiorparietal_4)(lh.inferiorparietal_5)(lh.isthmuscingulate_3)(lh.lingual_6)      |

|         |          |         |         |                                                                                        |
|---------|----------|---------|---------|----------------------------------------------------------------------------------------|
| 0.00177 | 1.00E-05 | 0.81227 | 0.91457 | (lh.inferiorparietal_4)(lh.insula_2)(lh.lingual_8)(lh.precuneus_11)                    |
| 0.00177 | 1.00E-05 | 0.81227 | 0.91457 | (Left-Thalamus-Proper)(lh.inferiorparietal_4)(lh.inferiorparietal_5)(lh.lingual_6)     |
| 0.00177 | 1.00E-05 | 0.81227 | 0.91457 | (lh.inferiorparietal_4)(lh.inferiorparietal_5)(lh.lingual_6)                           |
| 0.00177 | 1.00E-05 | 0.74729 | 0.86432 | (lh.precuneus_11)(lh.superiortemporal_3)(lh.supramarginal_1)(lh.transversetemporal_2)  |
| 0.00183 | 1.00E-05 | 0.81949 | 0.9196  | (Left-Thalamus-Proper)(lh.inferiorparietal_4)(lh.lingual_6)(lh.precuneus_11)           |
| 0.00183 | 1.00E-05 | 0.81949 | 0.9196  | (lh.inferiorparietal_4)(lh.inferiorparietal_5)(lh.insula_2)                            |
| 0.00183 | 1.00E-05 | 0.81949 | 0.9196  | (lh.inferiorparietal_4)(lh.inferiorparietal_5)(lh.insula_2)(lh.isthmuscingulate_3)     |
| 0.00183 | 1.00E-05 | 0.81949 | 0.9196  | (Left-Thalamus-Proper)(lh.inferiorparietal_4)(lh.inferiorparietal_5)(lh.insula_2)      |
| 0.00183 | 1.00E-05 | 0.81949 | 0.9196  | (Left-Putamen)(lh.inferiorparietal_4)(lh.lingual_8)(lh.precuneus_11)                   |
| 0.00183 | 1.00E-05 | 0.81949 | 0.9196  | (lh.inferiorparietal_4)(lh.isthmuscingulate_3)(lh.lingual_6)(lh.precuneus_11)          |
| 0.00183 | 1.00E-05 | 0.81949 | 0.9196  | (lh.inferiorparietal_4)(lh.lingual_6)(lh.precuneus_11)                                 |
| 0.00183 | 1.00E-05 | 0.81949 | 0.9196  | (Left-Putamen)(lh.inferiorparietal_4)(lh.inferiorparietal_5)(lh.insula_2)              |
| 0.00184 | 1.00E-05 | 0.72924 | 0.84925 | (lh.fusiform_6)(lh.inferiorparietal_4)(lh.inferiorparietal_5)(lh.precuneus_11)         |
| 0.00187 | 1.00E-05 | 0.77978 | 0.88945 | (lh.inferiorparietal_5)(lh.insula_2)(lh.precuneus_11)(lh.supramarginal_1)              |
| 0.00188 | 1.00E-05 | 0.82671 | 0.92462 | (lh.inferiorparietal_4)(lh.insula_2)(lh.isthmuscingulate_3)(lh.precuneus_11)           |
| 0.00188 | 1.00E-05 | 0.82671 | 0.92462 | (lh.inferiorparietal_4)(lh.insula_2)(lh.precuneus_11)                                  |
| 0.00188 | 1.00E-05 | 0.82671 | 0.92462 | (Left-Putamen)(lh.inferiorparietal_4)(lh.inferiorparietal_5)(lh.isthmuscingulate_3)    |
| 0.00188 | 1.00E-05 | 0.82671 | 0.92462 | (Left-Thalamus-Proper)(lh.inferiorparietal_4)(lh.insula_2)(lh.precuneus_11)            |
| 0.00188 | 1.00E-05 | 0.82671 | 0.92462 | (Left-Putamen)(lh.inferiorparietal_4)(lh.inferiorparietal_5)                           |
| 0.00188 | 1.00E-05 | 0.82671 | 0.92462 | (Left-Putamen)(lh.inferiorparietal_4)(lh.insula_2)(lh.precuneus_11)                    |
| 0.00188 | 1.00E-05 | 0.82671 | 0.92462 | (Left-Putamen)(Left-Thalamus-Proper)(lh.inferiorparietal_4)(lh.inferiorparietal_5)     |
| 0.00191 | 1.00E-05 | 0.92058 | 0.98492 | (Left-Thalamus-Proper)(lh.inferiorparietal_5)(lh.insula_2)(lh.precuneus_11)            |
| 0.00191 | 1.00E-05 | 0.92058 | 0.98492 | (Left-Putamen)(lh.inferiorparietal_5)(lh.insula_2)(lh.precuneus_11)                    |
| 0.00191 | 1.00E-05 | 0.92058 | 0.98492 | (lh.inferiorparietal_5)(lh.insula_2)(lh.precuneus_11)                                  |
| 0.00191 | 1.00E-05 | 0.92058 | 0.98492 | (lh.inferiorparietal_5)(lh.insula_2)(lh.isthmuscingulate_3)(lh.precuneus_11)           |
| 0.00191 | 1.00E-05 | 0.83394 | 0.92965 | (Left-Putamen)(lh.inferiorparietal_4)(lh.precuneus_11)                                 |
| 0.00191 | 1.00E-05 | 0.83394 | 0.92965 | (Left-Putamen)(lh.inferiorparietal_4)(lh.isthmuscingulate_3)(lh.precuneus_11)          |
| 0.00191 | 1.00E-05 | 0.83394 | 0.92965 | (Left-Putamen)(Left-Thalamus-Proper)(lh.inferiorparietal_4)(lh.precuneus_11)           |
| 0.00198 | 1.00E-05 | 0.76761 | 0.8794  | (lh.bankssts_3)(lh.inferiorparietal_4)(lh.inferiorparietal_5)(lh.parahippocampal_3)    |
| 0.00198 | 1.00E-05 | 0.76761 | 0.8794  | (lh.bankssts_3)(lh.inferiorparietal_4)(lh.inferiorparietal_5)(lh.transversetemporal_2) |
| 0.00198 | 1.00E-05 | 0.787   | 0.89447 | (Left-Putamen)(lh.inferiorparietal_5)(lh.precuneus_11)(lh.supramarginal_1)             |
| 0.002   | 1.00E-05 | 0.73646 | 0.85427 | (lh.inferiorparietal_4)(lh.inferiorparietal_5)(lh.parahippocampal_1)(lh.precuneus_11)  |
| 0.00204 | 1.00E-05 | 0.70036 | 0.82412 | (Left-Thalamus-Proper)(lh.inferiorparietal_4)(lh.insula_1)(lh.supramarginal_1)         |
| 0.00204 | 1.00E-05 | 0.70036 | 0.82412 | (lh.inferiorparietal_4)(lh.insula_1)(lh.superiortemporal_2)(lh.supramarginal_1)        |
| 0.00204 | 1.00E-05 | 0.70036 | 0.82412 | (lh.inferiorparietal_4)(lh.insula_1)(lh.isthmuscingulate_3)(lh.supramarginal_1)        |
| 0.00204 | 1.00E-05 | 0.70036 | 0.82412 | (lh.inferiorparietal_4)(lh.insula_1)(lh.supramarginal_1)                               |

|         |          |         |         |                                                                                          |
|---------|----------|---------|---------|------------------------------------------------------------------------------------------|
| 0.00205 | 1.00E-05 | 0.71841 | 0.8392  | (lh.inferiorparietal_4)(lh.parahippocampal_1)(lh.precuneus_11)(lh.superiortemporal_8)    |
| 0.00205 | 1.00E-05 | 0.76173 | 0.87437 | (Left-Putamen)(lh.precuneus_11)(lh.supramarginal_1)(lh.transversetemporal_2)             |
| 0.00205 | 1.00E-05 | 0.76173 | 0.87437 | (Brain_Stem)(lh.inferiorparietal_4)(lh.inferiorparietal_5)(lh.precuneus_11)              |
| 0.00208 | 1.00E-05 | 0.77465 | 0.88442 | (lh.bankssts_3)(lh.inferiorparietal_4)(lh.precuneus_11)(lh.transversetemporal_2)         |
| 0.00208 | 1.00E-05 | 0.77465 | 0.88442 | (lh.bankssts_3)(lh.inferiorparietal_4)(lh.parahippocampal_3)(lh.precuneus_11)            |
| 0.00209 | 1.00E-05 | 0.79422 | 0.8995  | (Left-Pallidum)(lh.inferiorparietal_4)(lh.lingual_8)(lh.precuneus_11)                    |
| 0.00209 | 1.00E-05 | 0.79422 | 0.8995  | (lh.inferiorparietal_4)(lh.inferiorparietal_5)(lh.lingual_6)(lh.superiortemporal_3)      |
| 0.00217 | 1.00E-05 | 0.74368 | 0.8593  | (lh.fusiform_7)(lh.inferiorparietal_4)(lh.parahippocampal_1)(lh.precuneus_11)            |
| 0.00217 | 1.00E-05 | 0.74368 | 0.8593  | (lh.inferiorparietal_4)(lh.insula_4)(lh.parahippocampal_1)(lh.precuneus_11)              |
| 0.0022  | 1.00E-05 | 0.68953 | 0.81407 | (lh.inferiorparietal_4)(lh.insula_1)(lh.lingual_8)(lh.supramarginal_1)                   |
| 0.0022  | 1.00E-05 | 0.68953 | 0.81407 | (lh.inferiorparietal_4)(lh.insula_1)(lh.lingual_6)(lh.supramarginal_1)                   |
| 0.0022  | 1.00E-05 | 0.80144 | 0.90452 | (Left-Pallidum)(Left-Putamen)(lh.inferiorparietal_4)(lh.inferiorparietal_5)              |
| 0.0022  | 1.00E-05 | 0.80144 | 0.90452 | (lh.inferiorparietal_4)(lh.inferiorparietal_5)(lh.lingual_6)(lh.lingual_8)               |
| 0.0022  | 1.00E-05 | 0.80144 | 0.90452 | (Left-Pallidum)(lh.inferiorparietal_4)(lh.inferiorparietal_5)(lh.isthmuscingulate_3)     |
| 0.0022  | 1.00E-05 | 0.80144 | 0.90452 | (Left-Pallidum)(lh.inferiorparietal_4)(lh.inferiorparietal_5)                            |
| 0.0022  | 1.00E-05 | 0.80144 | 0.90452 | (Left-Putamen)(lh.inferiorparietal_4)(lh.precuneus_11)(lh.transversetemporal_2)          |
| 0.0022  | 1.00E-05 | 0.80144 | 0.90452 | (lh.inferiorparietal_4)(lh.lingual_6)(lh.precuneus_11)(lh.superiortemporal_3)            |
| 0.0022  | 1.00E-05 | 0.80144 | 0.90452 | (Left-Pallidum)(Left-Thalamus-Propor)(lh.inferiorparietal_4)(lh.inferiorparietal_5)      |
| 0.00223 | 1.00E-05 | 0.72563 | 0.84422 | (lh.bankssts_3)(lh.inferiorparietal_4)(lh.inferiorparietal_5)(lh.superiortemporal_8)     |
| 0.00229 | 1.00E-05 | 0.78873 | 0.89447 | (lh.bankssts_3)(lh.inferiorparietal_4)(lh.inferiorparietal_5)(lh.lingual_6)              |
| 0.00229 | 1.00E-05 | 0.78873 | 0.89447 | (lh.bankssts_3)(lh.inferiorparietal_4)(lh.inferiorparietal_5)(lh.lingual_8)              |
| 0.00229 | 1.00E-05 | 0.78873 | 0.89447 | (Left-Pallidum)(lh.inferiorparietal_4)(lh.inferiorparietal_5)(lh.lingual_6)              |
| 0.00231 | 1.00E-05 | 0.80866 | 0.90955 | (Left-Pallidum)(lh.inferiorparietal_4)(lh.precuneus_11)                                  |
| 0.00231 | 1.00E-05 | 0.80866 | 0.90955 | (Left-Pallidum)(Left-Thalamus-Propor)(lh.inferiorparietal_4)(lh.precuneus_11)            |
| 0.00231 | 1.00E-05 | 0.80866 | 0.90955 | (Left-Pallidum)(lh.inferiorparietal_4)(lh.isthmuscingulate_3)(lh.precuneus_11)           |
| 0.00231 | 1.00E-05 | 0.80866 | 0.90955 | (lh.inferiorparietal_4)(lh.lingual_6)(lh.lingual_8)(lh.precuneus_11)                     |
| 0.00231 | 1.00E-05 | 0.80866 | 0.90955 | (Left-Pallidum)(Left-Putamen)(lh.inferiorparietal_4)(lh.precuneus_11)                    |
| 0.00231 | 1.00E-05 | 0.88809 | 0.96482 | (lh.inferiorparietal_5)(lh.isthmuscingulate_3)(lh.precuneus_11)(lh.transversetemporal_2) |
| 0.00231 | 1.00E-05 | 0.88809 | 0.96482 | (lh.inferiorparietal_5)(lh.precuneus_11)(lh.transversetemporal_2)                        |
| 0.00231 | 1.00E-05 | 0.88809 | 0.96482 | (Left-Thalamus-Propor)(lh.inferiorparietal_5)(lh.precuneus_11)(lh.transversetemporal_2)  |
| 0.00234 | 1.00E-05 | 0.91336 | 0.9799  | (lh.inferiorparietal_5)(lh.lingual_6)(lh.precuneus_11)                                   |
| 0.00234 | 1.00E-05 | 0.91336 | 0.9799  | (Left-Thalamus-Propor)(lh.inferiorparietal_5)(lh.lingual_6)(lh.precuneus_11)             |
| 0.00234 | 1.00E-05 | 0.91336 | 0.9799  | (lh.inferiorparietal_5)(lh.isthmuscingulate_3)(lh.lingual_6)(lh.precuneus_11)            |
| 0.00235 | 1.00E-05 | 0.7509  | 0.86432 | (lh.inferiorparietal_4)(lh.inferiorparietal_5)(lh.insula_4)(lh.precuneus_11)             |
| 0.00235 | 1.00E-05 | 0.7509  | 0.86432 | (lh.inferiorparietal_4)(lh.inferiorparietal_5)(lh.insula_2)(lh.lingual_7)                |
| 0.00238 | 1.00E-05 | 0.79577 | 0.8995  | (lh.bankssts_3)(lh.inferiorparietal_4)(lh.lingual_8)(lh.precuneus_11)                    |

|         |          |         |         |                                                                                             |
|---------|----------|---------|---------|---------------------------------------------------------------------------------------------|
| 0.00238 | 1.00E-05 | 0.79577 | 0.8995  | (lh.bankssts_3)(lh.inferiorparietal_4)(lh.lingual_6)(lh.precuneus_11)                       |
| 0.00238 | 1.00E-05 | 0.79577 | 0.8995  | (Left-Putamen)(lh.bankssts_3)(lh.inferiorparietal_4)(lh.lingual_6)                          |
| 0.00238 | 1.00E-05 | 0.79577 | 0.8995  | (Left-Pallidum)(lh.inferiorparietal_4)(lh.lingual_6)(lh.precuneus_11)                       |
| 0.00238 | 1.00E-05 | 0.79577 | 0.8995  | (Left-Putamen)(lh.bankssts_3)(lh.inferiorparietal_4)(lh.lingual_8)                          |
| 0.00238 | 1.00E-05 | 0.79577 | 0.8995  | (Left-Putamen)(lh.inferiorparietal_4)(lh.inferiorparietal_5)(lh.transversetemporal_2)       |
| 0.00244 | 1.00E-05 | 0.73285 | 0.84925 | (lh.bankssts_3)(lh.inferiorparietal_4)(lh.precuneus_11)(lh.superiortemporal_8)              |
| 0.00244 | 1.00E-05 | 0.73285 | 0.84925 | (lh.fusiform_7)(lh.inferiorparietal_4)(lh.inferiorparietal_5)(lh.superiortemporal_8)        |
| 0.00244 | 1.00E-05 | 0.73285 | 0.84925 | (lh.inferiorparietal_4)(lh.inferiorparietal_5)(lh.lingual_8)(lh.superiortemporal_8)         |
| 0.00244 | 1.00E-05 | 0.73285 | 0.84925 | (Left-Pallidum)(lh.inferiorparietal_4)(lh.inferiorparietal_5)(lh.lingual_7)                 |
| 0.00246 | 1.00E-05 | 0.7148  | 0.83417 | (lh.inferiorparietal_4)(lh.inferiorparietal_5)(lh.parahippocampal_1)(lh.superiortemporal_8) |
| 0.00247 | 1.00E-05 | 0.88087 | 0.9598  | (Left-Pallidum)(lh.inferiorparietal_5)(lh.lingual_6)(lh.precuneus_11)                       |
| 0.00251 | 1.00E-05 | 0.78339 | 0.88945 | (lh.precuneus_11)(lh.superiortemporal_3)(lh.supramarginal_1)                                |
| 0.00251 | 1.00E-05 | 0.78339 | 0.88945 | (lh.precuneus_11)(lh.superiortemporal_2)(lh.superiortemporal_3)(lh.supramarginal_1)         |
| 0.00251 | 1.00E-05 | 0.78339 | 0.88945 | (Left-Thalamus-Proper)(lh.precuneus_11)(lh.superiortemporal_3)(lh.supramarginal_1)          |
| 0.00251 | 1.00E-05 | 0.78339 | 0.88945 | (Left-Putamen)(lh.precuneus_11)(lh.superiortemporal_3)(lh.supramarginal_1)                  |
| 0.00251 | 1.00E-05 | 0.78339 | 0.88945 | (lh.isthmuscingulate_3)(lh.precuneus_11)(lh.superiortemporal_3)(lh.supramarginal_1)         |
| 0.00254 | 1.00E-05 | 0.75812 | 0.86935 | (lh.inferiorparietal_4)(lh.insula_2)(lh.lingual_7)(lh.precuneus_11)                         |
| 0.00254 | 1.00E-05 | 0.75812 | 0.86935 | (lh.insula_2)(lh.precuneus_11)(lh.supramarginal_1)(lh.transversetemporal_2)                 |
| 0.00254 | 1.00E-05 | 0.75812 | 0.86935 | (Left-Putamen)(lh.inferiorparietal_4)(lh.inferiorparietal_5)(lh.lingual_7)                  |
| 0.0026  | 1.00E-05 | 0.68592 | 0.80905 | (lh.inferiorparietal_4)(lh.lingual_7)(lh.precuneus_11)(lh.superiortemporal_8)               |
| 0.00265 | 1.00E-05 | 0.74007 | 0.85427 | (lh.inferiorparietal_4)(lh.inferiorparietal_5)(lh.insula_4)(lh.parahippocampal_1)           |
| 0.00265 | 1.00E-05 | 0.74007 | 0.85427 | (Left-Pallidum)(lh.inferiorparietal_4)(lh.lingual_7)(lh.precuneus_11)                       |
| 0.00265 | 1.00E-05 | 0.74007 | 0.85427 | (Left-Pallidum)(lh.inferiorparietal_4)(lh.inferiorparietal_5)(lh.superiortemporal_8)        |
| 0.00265 | 1.00E-05 | 0.74007 | 0.85427 | (lh.fusiform_7)(lh.inferiorparietal_4)(lh.precuneus_11)(lh.superiortemporal_8)              |
| 0.00265 | 1.00E-05 | 0.74007 | 0.85427 | (lh.inferiorparietal_4)(lh.lingual_8)(lh.precuneus_11)(lh.superiortemporal_8)               |
| 0.00265 | 1.00E-05 | 0.74007 | 0.85427 | (Left-Amygdala)(lh.inferiorparietal_4)(lh.inferiorparietal_5)(lh.precuneus_11)              |
| 0.00265 | 1.00E-05 | 0.74007 | 0.85427 | (lh.fusiform_7)(lh.inferiorparietal_4)(lh.inferiorparietal_5)(lh.parahippocampal_1)         |
| 0.00265 | 1.00E-05 | 0.74007 | 0.85427 | (Left-Pallidum)(lh.precuneus_11)(lh.supramarginal_1)(lh.transversetemporal_2)               |
| 0.00266 | 1.00E-05 | 0.79061 | 0.89447 | (lh.inferiorparietal_5)(lh.precuneus_11)(lh.supramarginal_1)                                |
| 0.00266 | 1.00E-05 | 0.79061 | 0.89447 | (lh.inferiorparietal_5)(lh.precuneus_11)(lh.superiortemporal_2)(lh.supramarginal_1)         |
| 0.00266 | 1.00E-05 | 0.79061 | 0.89447 | (lh.inferiorparietal_5)(lh.isthmuscingulate_3)(lh.precuneus_11)(lh.supramarginal_1)         |
| 0.00266 | 1.00E-05 | 0.79061 | 0.89447 | (Left-Thalamus-Proper)(lh.inferiorparietal_5)(lh.precuneus_11)(lh.supramarginal_1)          |
| 0.00269 | 1.00E-05 | 0.85921 | 0.94472 | (Left-Pallidum)(lh.inferiorparietal_5)(lh.precuneus_11)(lh.transversetemporal_2)            |
| 0.00269 | 1.00E-05 | 0.72202 | 0.8392  | (lh.fusiform_6)(lh.inferiorparietal_4)(lh.inferiorparietal_5)(lh.lingual_6)                 |
| 0.00269 | 1.00E-05 | 0.72202 | 0.8392  | (lh.lingual_7)(lh.precuneus_11)(lh.superiortemporal_3)(lh.supramarginal_1)                  |
| 0.00273 | 1.00E-05 | 0.76534 | 0.87437 | (Left-Putamen)(lh.inferiorparietal_4)(lh.lingual_7)(lh.precuneus_11)                        |



|         |          |         |         |                                                                                              |
|---------|----------|---------|---------|----------------------------------------------------------------------------------------------|
| 0.00273 | 1.00E-05 | 0.76534 | 0.87437 | (lh.precuneus_11)(lh.superiortemporal_2)(lh.supramarginal_1)(lh.transversetemporal_2)        |
| 0.00273 | 1.00E-05 | 0.76534 | 0.87437 | (Left-Thalamus-Proper)(lh.precuneus_11)(lh.supramarginal_1)(lh.transversetemporal_2)         |
| 0.00282 | 1.00E-05 | 0.79783 | 0.8995  | (lh.inferiorparietal_4)(lh.insula_2)(lh.precuneus_11)(lh.transversetemporal_2)               |
| 0.00287 | 1.00E-05 | 0.74729 | 0.8593  | (Left-Thalamus-Proper)(lh.inferiorparietal_4)(lh.inferiorparietal_5)(lh.superiortemporal_8)  |
| 0.00287 | 1.00E-05 | 0.74729 | 0.8593  | (Left-Putamen)(lh.inferiorparietal_4)(lh.inferiorparietal_5)(lh.superiortemporal_8)          |
| 0.00287 | 1.00E-05 | 0.74729 | 0.8593  | (lh.inferiorparietal_4)(lh.inferiorparietal_5)(lh.insula_2)(lh.superiortemporal_8)           |
| 0.00287 | 1.00E-05 | 0.74729 | 0.8593  | (lh.inferiorparietal_4)(lh.inferiorparietal_5)(lh.lingual_6)(lh.lingual_7)                   |
| 0.00287 | 1.00E-05 | 0.74729 | 0.8593  | (Left-Pallidum)(lh.inferiorparietal_4)(lh.precuneus_11)(lh.superiortemporal_8)               |
| 0.00287 | 1.00E-05 | 0.74729 | 0.8593  | (lh.inferiorparietal_4)(lh.inferiorparietal_5)(lh.superiortemporal_8)                        |
| 0.00287 | 1.00E-05 | 0.74729 | 0.8593  | (lh.inferiorparietal_4)(lh.inferiorparietal_5)(lh.isthmuscingulate_3)(lh.superiortemporal_8) |
| 0.00293 | 2.00E-05 | 0.77256 | 0.8794  | (Left-Pallidum)(lh.insula_2)(lh.precuneus_11)(lh.supramarginal_1)                            |
| 0.00293 | 2.00E-05 | 0.77256 | 0.8794  | (lh.lingual_6)(lh.precuneus_11)(lh.superiortemporal_3)(lh.supramarginal_1)                   |
| 0.00294 | 2.00E-05 | 0.72924 | 0.84422 | (lh.inferiorparietal_5)(lh.lingual_7)(lh.precuneus_11)(lh.supramarginal_1)                   |
| 0.00294 | 2.00E-05 | 0.72924 | 0.84422 | (lh.fusiform_6)(lh.inferiorparietal_4)(lh.lingual_6)(lh.precuneus_11)                        |
| 0.00294 | 2.00E-05 | 0.72924 | 0.84422 | (lh.fusiform_6)(lh.inferiorparietal_4)(lh.inferiorparietal_5)(lh.lingual_8)                  |
| 0.00297 | 2.00E-05 | 0.80505 | 0.90452 | (lh.inferiorparietal_4)(lh.inferiorparietal_5)(lh.isthmuscingulate_2)(lh.precuneus_11)       |
| 0.00304 | 2.00E-05 | 0.89892 | 0.96985 | (Left-Pallidum)(lh.inferiorparietal_5)(lh.insula_2)(lh.precuneus_11)                         |
| 0.00311 | 2.00E-05 | 0.75451 | 0.86432 | (lh.inferiorparietal_4)(lh.isthmuscingulate_3)(lh.precuneus_11)(lh.superiortemporal_8)       |
| 0.00311 | 2.00E-05 | 0.75451 | 0.86432 | (Brain_Stem)(lh.inferiorparietal_4)(lh.inferiorparietal_5)(lh.lingual_6)                     |
| 0.00311 | 2.00E-05 | 0.75451 | 0.86432 | (lh.inferiorparietal_4)(lh.precuneus_11)(lh.superiortemporal_8)                              |
| 0.00311 | 2.00E-05 | 0.75451 | 0.86432 | (lh.inferiorparietal_5)(lh.superiortemporal_3)(lh.supramarginal_1)(lh.transversetemporal_2)  |
| 0.00311 | 2.00E-05 | 0.75451 | 0.86432 | (Left-Thalamus-Proper)(lh.inferiorparietal_4)(lh.precuneus_11)(lh.superiortemporal_8)        |
| 0.00311 | 2.00E-05 | 0.75451 | 0.86432 | (lh.inferiorparietal_4)(lh.insula_2)(lh.precuneus_11)(lh.superiortemporal_8)                 |
| 0.00311 | 2.00E-05 | 0.75451 | 0.86432 | (Left-Putamen)(lh.inferiorparietal_4)(lh.precuneus_11)(lh.superiortemporal_8)                |
| 0.00311 | 2.00E-05 | 0.75451 | 0.86432 | (lh.lingual_6)(lh.precuneus_11)(lh.supramarginal_1)(lh.transversetemporal_2)                 |
| 0.00311 | 2.00E-05 | 0.75451 | 0.86432 | (lh.inferiorparietal_4)(lh.lingual_6)(lh.lingual_7)(lh.precuneus_11)                         |
| 0.00312 | 2.00E-05 | 0.81227 | 0.90955 | (lh.inferiorparietal_4)(lh.inferiorparietal_5)(lh.lingual_6)(lh.superiortemporal_2)          |
| 0.00312 | 2.00E-05 | 0.81227 | 0.90955 | (Left-Putamen)(lh.inferiorparietal_4)(lh.inferiorparietal_5)(lh.superiortemporal_3)          |
| 0.00314 | 2.00E-05 | 0.77978 | 0.88442 | (lh.inferiorparietal_5)(lh.lingual_6)(lh.precuneus_11)(lh.supramarginal_1)                   |
| 0.00314 | 2.00E-05 | 0.77978 | 0.88442 | (lh.insula_2)(lh.precuneus_11)(lh.superiortemporal_3)(lh.supramarginal_1)                    |
| 0.0032  | 2.00E-05 | 0.73646 | 0.84925 | (lh.fusiform_6)(lh.inferiorparietal_4)(lh.lingual_8)(lh.precuneus_11)                        |
| 0.00321 | 2.00E-05 | 0.93502 | 0.98995 | (Left-Thalamus-Proper)(lh.inferiorparietal_5)(lh.isthmuscingulate_3)(lh.precuneus_11)        |
| 0.00321 | 2.00E-05 | 0.93502 | 0.98995 | (lh.inferiorparietal_5)(lh.isthmuscingulate_3)(lh.precuneus_11)                              |
| 0.00321 | 2.00E-05 | 0.93502 | 0.98995 | (lh.inferiorparietal_5)(lh.precuneus_11)                                                     |
| 0.00321 | 2.00E-05 | 0.93502 | 0.98995 | (Left-Thalamus-Proper)(lh.inferiorparietal_5)(lh.precuneus_11)                               |
| 0.00326 | 2.00E-05 | 0.81949 | 0.91457 | (lh.inferiorparietal_4)(lh.inferiorparietal_5)(lh.insula_2)(lh.superiortemporal_2)           |

|         |          |         |         |                                                                                             |
|---------|----------|---------|---------|---------------------------------------------------------------------------------------------|
| 0.00326 | 2.00E-05 | 0.81949 | 0.91457 | (Left-Thalamus-Proper)(lh.inferiorparietal_4)(lh.inferiorparietal_5)(lh.lingual_8)          |
| 0.00326 | 2.00E-05 | 0.81949 | 0.91457 | (lh.inferiorparietal_4)(lh.inferiorparietal_5)(lh.isthmuscingulate_3)(lh.lingual_8)         |
| 0.00326 | 2.00E-05 | 0.81949 | 0.91457 | (lh.inferiorparietal_4)(lh.lingual_6)(lh.precuneus_11)(lh.superiortemporal_2)               |
| 0.00326 | 2.00E-05 | 0.81949 | 0.91457 | (lh.inferiorparietal_4)(lh.inferiorparietal_5)(lh.lingual_8)                                |
| 0.00326 | 2.00E-05 | 0.81949 | 0.91457 | (Left-Putamen)(lh.inferiorparietal_4)(lh.precuneus_11)(lh.superiortemporal_3)               |
| 0.00329 | 2.00E-05 | 0.8917  | 0.96482 | (lh.inferiorparietal_5)(lh.lingual_6)(lh.precuneus_11)(lh.superiortemporal_3)               |
| 0.00339 | 2.00E-05 | 0.68953 | 0.80905 | (lh.inferiorparietal_4)(lh.insula_1)(lh.isthmuscingulate_2)(lh.supramarginal_1)             |
| 0.00339 | 2.00E-05 | 0.82671 | 0.9196  | (lh.inferiorparietal_4)(lh.insula_2)(lh.precuneus_11)(lh.superiortemporal_2)                |
| 0.00339 | 2.00E-05 | 0.82671 | 0.9196  | (Left-Thalamus-Proper)(lh.inferiorparietal_4)(lh.lingual_8)(lh.precuneus_11)                |
| 0.00339 | 2.00E-05 | 0.82671 | 0.9196  | (lh.inferiorparietal_4)(lh.isthmuscingulate_3)(lh.lingual_8)(lh.precuneus_11)               |
| 0.00339 | 2.00E-05 | 0.82671 | 0.9196  | (Left-Putamen)(lh.inferiorparietal_4)(lh.inferiorparietal_5)(lh.superiortemporal_2)         |
| 0.00339 | 2.00E-05 | 0.82671 | 0.9196  | (lh.inferiorparietal_4)(lh.lingual_8)(lh.precuneus_11)                                      |
| 0.00345 | 2.00E-05 | 0.77465 | 0.8794  | (Left-Pallidum)(lh.bankssts_3)(lh.inferiorparietal_4)(lh.lingual_6)                         |
| 0.00345 | 2.00E-05 | 0.77465 | 0.8794  | (Left-Pallidum)(lh.bankssts_3)(lh.inferiorparietal_4)(lh.lingual_8)                         |
| 0.00345 | 2.00E-05 | 0.77465 | 0.8794  | (Left-Pallidum)(lh.inferiorparietal_4)(lh.inferiorparietal_5)(lh.transversetemporal_2)      |
| 0.00348 | 2.00E-05 | 0.88448 | 0.9598  | (Left-Putamen)(lh.lingual_6)(lh.precuneus_11)(lh.transversetemporal_2)                      |
| 0.00348 | 2.00E-05 | 0.88448 | 0.9598  | (Left-Putamen)(lh.inferiorparietal_5)(lh.lingual_6)(lh.transversetemporal_2)                |
| 0.00348 | 2.00E-05 | 0.74368 | 0.85427 | (lh.bankssts_3)(lh.precuneus_11)(lh.supramarginal_1)(lh.transversetemporal_2)               |
| 0.00349 | 2.00E-05 | 0.70758 | 0.82412 | (lh.lingual_7)(lh.precuneus_11)(lh.supramarginal_1)(lh.transversetemporal_2)                |
| 0.0035  | 2.00E-05 | 0.83394 | 0.92462 | (lh.inferiorparietal_4)(lh.inferiorparietal_5)                                              |
| 0.0035  | 2.00E-05 | 0.83394 | 0.92462 | (Left-Thalamus-Proper)(lh.inferiorparietal_4)(lh.inferiorparietal_5)(lh.isthmuscingulate_3) |
| 0.0035  | 2.00E-05 | 0.83394 | 0.92462 | (Left-Putamen)(lh.inferiorparietal_4)(lh.precuneus_11)(lh.superiortemporal_2)               |
| 0.0035  | 2.00E-05 | 0.83394 | 0.92462 | (lh.inferiorparietal_4)(lh.inferiorparietal_5)(lh.isthmuscingulate_3)                       |
| 0.0035  | 2.00E-05 | 0.83394 | 0.92462 | (Left-Thalamus-Proper)(lh.inferiorparietal_4)(lh.inferiorparietal_5)                        |
| 0.00352 | 2.00E-05 | 0.72563 | 0.8392  | (lh.fusiform_7)(lh.inferiorparietal_4)(lh.parahippocampal_1)(lh.superiortemporal_8)         |
| 0.00356 | 2.00E-05 | 0.79422 | 0.89447 | (lh.inferiorparietal_4)(lh.lingual_8)(lh.precuneus_11)(lh.transversetemporal_2)             |
| 0.00356 | 2.00E-05 | 0.79422 | 0.89447 | (lh.insula_2)(lh.precuneus_11)(lh.superiortemporal_2)(lh.supramarginal_1)                   |
| 0.00356 | 2.00E-05 | 0.79422 | 0.89447 | (Left-Putamen)(lh.insula_2)(lh.precuneus_11)(lh.supramarginal_1)                            |
| 0.00356 | 2.00E-05 | 0.79422 | 0.89447 | (Left-Thalamus-Proper)(lh.insula_2)(lh.precuneus_11)(lh.supramarginal_1)                    |
| 0.00356 | 2.00E-05 | 0.79422 | 0.89447 | (lh.insula_2)(lh.precuneus_11)(lh.supramarginal_1)                                          |
| 0.00356 | 2.00E-05 | 0.79422 | 0.89447 | (lh.insula_2)(lh.isthmuscingulate_3)(lh.precuneus_11)(lh.supramarginal_1)                   |
| 0.0036  | 2.00E-05 | 0.84116 | 0.92965 | (lh.inferiorparietal_4)(lh.precuneus_11)                                                    |
| 0.0036  | 2.00E-05 | 0.84116 | 0.92965 | (Left-Thalamus-Proper)(lh.inferiorparietal_4)(lh.isthmuscingulate_3)(lh.precuneus_11)       |
| 0.0036  | 2.00E-05 | 0.84116 | 0.92965 | (lh.inferiorparietal_4)(lh.isthmuscingulate_3)(lh.precuneus_11)                             |
| 0.0036  | 2.00E-05 | 0.84116 | 0.92965 | (Left-Thalamus-Proper)(lh.inferiorparietal_4)(lh.precuneus_11)                              |
| 0.00362 | 2.00E-05 | 0.76895 | 0.87437 | (Left-Putamen)(lh.inferiorparietal_5)(lh.supramarginal_1)(lh.transversetemporal_2)          |

|         |          |         |         |                                                                                                |
|---------|----------|---------|---------|------------------------------------------------------------------------------------------------|
| 0.00365 | 2.00E-05 | 0.78169 | 0.88442 | (Left-Pallidum)(lh.inferiorparietal_4)(lh.precuneus_11)(lh.transversetemporal_2)               |
| 0.00369 | 2.00E-05 | 0.87004 | 0.94975 | (lh.inferiorparietal_5)(lh.precuneus_11)(lh.superiortemporal_3)(lh.transversetemporal_2)       |
| 0.00372 | 2.00E-05 | 0.86282 | 0.94472 | (lh.bankssts_3)(lh.inferiorparietal_5)(lh.precuneus_11)(lh.transversetemporal_2)               |
| 0.00374 | 2.00E-05 | 0.69675 | 0.81407 | (lh.fusiform_5)(lh.inferiorparietal_4)(lh.insula_1)(lh.supramarginal_1)                        |
| 0.00378 | 2.00E-05 | 0.80144 | 0.8995  | (Left-Putamen)(lh.isthmuscingulate_3)(lh.precuneus_11)(lh.supramarginal_1)                     |
| 0.00378 | 2.00E-05 | 0.80144 | 0.8995  | (Left-Putamen)(lh.precuneus_11)(lh.superiortemporal_2)(lh.supramarginal_1)                     |
| 0.00378 | 2.00E-05 | 0.80144 | 0.8995  | (lh.inferiorparietal_4)(lh.inferiorparietal_5)(lh.lingual_8)(lh.superiortemporal_3)            |
| 0.00378 | 2.00E-05 | 0.80144 | 0.8995  | (Left-Putamen)(lh.precuneus_11)(lh.supramarginal_1)                                            |
| 0.00378 | 2.00E-05 | 0.80144 | 0.8995  | (Left-Thalamus-Proper)(lh.inferiorparietal_4)(lh.inferiorparietal_5)(lh.transversetemporal_2)  |
| 0.00378 | 2.00E-05 | 0.80144 | 0.8995  | (Left-Pallidum)(lh.inferiorparietal_4)(lh.inferiorparietal_5)(lh.superiortemporal_2)           |
| 0.00378 | 2.00E-05 | 0.80144 | 0.8995  | (lh.inferiorparietal_4)(lh.inferiorparietal_5)(lh.transversetemporal_2)                        |
| 0.00378 | 2.00E-05 | 0.80144 | 0.8995  | (lh.inferiorparietal_4)(lh.inferiorparietal_5)(lh.isthmuscingulate_3)(lh.transversetemporal_2) |
| 0.00378 | 2.00E-05 | 0.80144 | 0.8995  | (Left-Putamen)(Left-Thalamus-Proper)(lh.precuneus_11)(lh.supramarginal_1)                      |
| 0.00378 | 2.00E-05 | 0.7509  | 0.8593  | (Brain_Stem)(Left-Pallidum)(lh.inferiorparietal_4)(lh.inferiorparietal_5)                      |
| 0.00378 | 2.00E-05 | 0.7509  | 0.8593  | (lh.fusiform_7)(lh.inferiorparietal_4)(lh.insula_4)(lh.parahippocampal_1)                      |
| 0.00383 | 2.00E-05 | 0.7148  | 0.82915 | (Left-Pallidum)(lh.lingual_7)(lh.precuneus_11)(lh.supramarginal_1)                             |
| 0.00384 | 2.00E-05 | 0.78873 | 0.88945 | (Left-Pallidum)(lh.bankssts_3)(lh.inferiorparietal_4)                                          |
| 0.00384 | 2.00E-05 | 0.78873 | 0.88945 | (Left-Pallidum)(lh.bankssts_3)(lh.inferiorparietal_4)(lh.isthmuscingulate_3)                   |
| 0.00384 | 2.00E-05 | 0.78873 | 0.88945 | (lh.bankssts_3)(lh.inferiorparietal_4)(lh.inferiorparietal_5)(lh.superiortemporal_3)           |
| 0.00384 | 2.00E-05 | 0.78873 | 0.88945 | (lh.inferiorparietal_4)(lh.inferiorparietal_5)(lh.lingual_6)(lh.parahippocampal_3)             |
| 0.00384 | 2.00E-05 | 0.78873 | 0.88945 | (lh.inferiorparietal_4)(lh.inferiorparietal_5)(lh.lingual_6)(lh.transversetemporal_2)          |
| 0.00385 | 2.00E-05 | 0.73285 | 0.84422 | (lh.insula_2)(lh.lingual_7)(lh.precuneus_11)(lh.supramarginal_1)                               |
| 0.00385 | 2.00E-05 | 0.73285 | 0.84422 | (Left-Amygdala)(lh.inferiorparietal_4)(lh.inferiorparietal_5)(lh.lingual_6)                    |
| 0.00385 | 2.00E-05 | 0.73285 | 0.84422 | (lh.inferiorparietal_4)(lh.inferiorparietal_5)(lh.lingual_7)(lh.transversetemporal_2)          |
| 0.00389 | 2.00E-05 | 0.77617 | 0.8794  | (Left-Pallidum)(Left-Thalamus-Proper)(lh.precuneus_11)(lh.supramarginal_1)                     |
| 0.00389 | 2.00E-05 | 0.77617 | 0.8794  | (Left-Pallidum)(lh.precuneus_11)(lh.superiortemporal_2)(lh.supramarginal_1)                    |
| 0.00389 | 2.00E-05 | 0.77617 | 0.8794  | (Left-Pallidum)(lh.isthmuscingulate_3)(lh.precuneus_11)(lh.supramarginal_1)                    |
| 0.00389 | 2.00E-05 | 0.77617 | 0.8794  | (lh.fusiform_5)(lh.precuneus_11)(lh.superiortemporal_3)(lh.supramarginal_1)                    |
| 0.00389 | 2.00E-05 | 0.77617 | 0.8794  | (Left-Pallidum)(lh.precuneus_11)(lh.supramarginal_1)                                           |
| 0.00389 | 2.00E-05 | 0.77617 | 0.8794  | (Left-Pallidum)(Left-Putamen)(lh.precuneus_11)(lh.supramarginal_1)                             |
| 0.00393 | 2.00E-05 | 0.90975 | 0.97487 | (Left-Putamen)(lh.inferiorparietal_5)(lh.precuneus_11)(lh.superiortemporal_3)                  |
| 0.00399 | 2.00E-05 | 0.80866 | 0.90452 | (Left-Pallidum)(lh.inferiorparietal_4)(lh.precuneus_11)(lh.superiortemporal_2)                 |
| 0.00399 | 2.00E-05 | 0.80866 | 0.90452 | (lh.inferiorparietal_4)(lh.precuneus_11)(lh.transversetemporal_2)                              |
| 0.00399 | 2.00E-05 | 0.80866 | 0.90452 | (lh.inferiorparietal_4)(lh.lingual_8)(lh.precuneus_11)(lh.superiortemporal_3)                  |
| 0.00399 | 2.00E-05 | 0.80866 | 0.90452 | (lh.inferiorparietal_4)(lh.isthmuscingulate_3)(lh.precuneus_11)(lh.transversetemporal_2)       |
| 0.00399 | 2.00E-05 | 0.80866 | 0.90452 | (lh.fusiform_5)(lh.inferiorparietal_4)(lh.inferiorparietal_5)(lh.lingual_6)                    |

|         |          |         |         |                                                                                              |
|---------|----------|---------|---------|----------------------------------------------------------------------------------------------|
| 0.00399 | 2.00E-05 | 0.80866 | 0.90452 | (Left-Thalamus-Proper)(lh.inferiorparietal_4)(lh.precuneus_11)(lh.transversetemporal_2)      |
| 0.00399 | 2.00E-05 | 0.80866 | 0.90452 | (lh.inferiorparietal_4)(lh.inferiorparietal_5)(lh.insula_2)(lh.superiortemporal_3)           |
| 0.004   | 2.00E-05 | 0.73944 | 0.84925 | (lh.inferiorparietal_4)(lh.isthmuscingulate_3)(lh.supramarginal_1)                           |
| 0.004   | 2.00E-05 | 0.73944 | 0.84925 | (lh.inferiorparietal_4)(lh.supramarginal_1)                                                  |
| 0.00403 | 2.00E-05 | 0.79577 | 0.89447 | (lh.bankssts_3)(lh.fusiform_5)(lh.inferiorparietal_4)(lh.inferiorparietal_5)                 |
| 0.00403 | 2.00E-05 | 0.79577 | 0.89447 | (lh.bankssts_3)(lh.inferiorparietal_4)(lh.precuneus_11)(lh.superiortemporal_3)               |
| 0.00403 | 2.00E-05 | 0.79577 | 0.89447 | (lh.inferiorparietal_4)(lh.lingual_6)(lh.parahippocampal_3)(lh.precuneus_11)                 |
| 0.00403 | 2.00E-05 | 0.79577 | 0.89447 | (lh.bankssts_3)(lh.inferiorparietal_4)(lh.insula_2)(lh.lingual_8)                            |
| 0.00403 | 2.00E-05 | 0.79577 | 0.89447 | (Left-Putamen)(lh.inferiorparietal_4)(lh.lingual_6)(lh.transversetemporal_2)                 |
| 0.00403 | 2.00E-05 | 0.79577 | 0.89447 | (lh.bankssts_3)(lh.inferiorparietal_4)(lh.insula_2)(lh.lingual_6)                            |
| 0.00403 | 2.00E-05 | 0.79577 | 0.89447 | (lh.inferiorparietal_4)(lh.inferiorparietal_5)(lh.insula_2)(lh.transversetemporal_2)         |
| 0.00403 | 2.00E-05 | 0.79577 | 0.89447 | (lh.inferiorparietal_4)(lh.lingual_6)(lh.precuneus_11)(lh.transversetemporal_2)              |
| 0.00403 | 2.00E-05 | 0.79577 | 0.89447 | (Left-Pallidum)(lh.inferiorparietal_4)(lh.inferiorparietal_5)(lh.lingual_8)                  |
| 0.00412 | 2.00E-05 | 0.70397 | 0.8191  | (lh.fusiform_6)(lh.inferiorparietal_5)(lh.precuneus_11)(lh.supramarginal_1)                  |
| 0.00415 | 2.00E-05 | 0.9278  | 0.98492 | (Left-Putamen)(lh.inferiorparietal_5)(lh.precuneus_11)(lh.superiortemporal_2)                |
| 0.00417 | 2.00E-05 | 0.78339 | 0.88442 | (lh.fusiform_5)(lh.inferiorparietal_5)(lh.precuneus_11)(lh.supramarginal_1)                  |
| 0.00417 | 2.00E-05 | 0.78339 | 0.88442 | (lh.insula_2)(lh.lingual_6)(lh.precuneus_11)(lh.supramarginal_1)                             |
| 0.00419 | 2.00E-05 | 0.74007 | 0.84925 | (lh.inferiorparietal_4)(lh.lingual_7)(lh.precuneus_11)(lh.transversetemporal_2)              |
| 0.00419 | 2.00E-05 | 0.74007 | 0.84925 | (lh.inferiorparietal_4)(lh.inferiorparietal_5)(lh.lingual_7)(lh.parahippocampal_3)           |
| 0.00419 | 2.00E-05 | 0.74007 | 0.84925 | (lh.inferiorparietal_4)(lh.lingual_6)(lh.parahippocampal_1)(lh.precuneus_11)                 |
| 0.00419 | 2.00E-05 | 0.74007 | 0.84925 | (lh.inferiorparietal_4)(lh.inferiorparietal_5)(lh.superiortemporal_3)(lh.superiortemporal_8) |
| 0.00419 | 2.00E-05 | 0.74007 | 0.84925 | (Left-Putamen)(lh.lingual_7)(lh.precuneus_11)(lh.supramarginal_1)                            |
| 0.0042  | 2.00E-05 | 0.72202 | 0.83417 | (lh.inferiorparietal_4)(lh.inferiorparietal_5)(lh.superiortemporal_8)(lh.transversetemporal_ |
| 0.0042  | 2.00E-05 | 0.81588 | 0.90955 | (lh.fusiform_5)(lh.inferiorparietal_4)(lh.lingual_6)(lh.precuneus_11)                        |
| 0.0042  | 2.00E-05 | 0.81588 | 0.90955 | (Left-Thalamus-Proper)(lh.inferiorparietal_4)(lh.inferiorparietal_5)(lh.superiortemporal_3)  |
| 0.0042  | 2.00E-05 | 0.81588 | 0.90955 | (lh.fusiform_5)(lh.inferiorparietal_4)(lh.inferiorparietal_5)(lh.insula_2)                   |
| 0.0042  | 2.00E-05 | 0.81588 | 0.90955 | (lh.inferiorparietal_4)(lh.inferiorparietal_5)(lh.superiortemporal_3)                        |
| 0.0042  | 2.00E-05 | 0.81588 | 0.90955 | (lh.inferiorparietal_4)(lh.insula_2)(lh.precuneus_11)(lh.superiortemporal_3)                 |
| 0.0042  | 2.00E-05 | 0.81588 | 0.90955 | (lh.inferiorparietal_4)(lh.inferiorparietal_5)(lh.superiortemporal_2)(lh.superiortemporal_3) |
| 0.0042  | 2.00E-05 | 0.81588 | 0.90955 | (lh.fusiform_5)(lh.inferiorparietal_4)(lh.inferiorparietal_5)(lh.lingual_8)                  |
| 0.0042  | 2.00E-05 | 0.81588 | 0.90955 | (lh.inferiorparietal_4)(lh.inferiorparietal_5)(lh.isthmuscingulate_3)(lh.superiortemporal_3) |
| 0.00434 | 2.00E-05 | 0.90253 | 0.96985 | (Left-Pallidum)(Left-Putamen)(lh.inferiorparietal_5)(lh.precuneus_11)                        |
| 0.00434 | 2.00E-05 | 0.90253 | 0.96985 | (Left-Pallidum)(Left-Thalamus-Proper)(lh.inferiorparietal_5)(lh.precuneus_11)                |
| 0.00434 | 2.00E-05 | 0.90253 | 0.96985 | (Left-Pallidum)(lh.inferiorparietal_5)(lh.isthmuscingulate_3)(lh.precuneus_11)               |
| 0.00434 | 2.00E-05 | 0.90253 | 0.96985 | (Left-Putamen)(lh.bankssts_3)(lh.inferiorparietal_5)(lh.precuneus_11)                        |
| 0.00434 | 2.00E-05 | 0.90253 | 0.96985 | (Left-Pallidum)(lh.inferiorparietal_5)(lh.precuneus_11)                                      |

|         |          |         |         |                                                                                              |
|---------|----------|---------|---------|----------------------------------------------------------------------------------------------|
| 0.00438 | 2.00E-05 | 0.69314 | 0.80905 | (lh.fusiform_7)(lh.inferiorparietal_4)(lh.precuneus_11)(lh.superiortemporal_11)              |
| 0.0044  | 2.00E-05 | 0.8231  | 0.91457 | (Left-Thalamus-Propri)(lh.inferiorparietal_4)(lh.precuneus_11)(lh.superiortemporal_3)        |
| 0.0044  | 2.00E-05 | 0.8231  | 0.91457 | (lh.fusiform_5)(lh.inferiorparietal_4)(lh.insula_2)(lh.precuneus_11)                         |
| 0.0044  | 2.00E-05 | 0.8231  | 0.91457 | (Left-Putamen)(lh.fusiform_5)(lh.inferiorparietal_4)(lh.inferiorparietal_5)                  |
| 0.0044  | 2.00E-05 | 0.8231  | 0.91457 | (lh.inferiorparietal_4)(lh.precuneus_11)(lh.superiortemporal_3)                              |
| 0.0044  | 2.00E-05 | 0.8231  | 0.91457 | (lh.inferiorparietal_4)(lh.isthmuscingulate_3)(lh.precuneus_11)(lh.superiortemporal_3)       |
| 0.0044  | 2.00E-05 | 0.8231  | 0.91457 | (lh.inferiorparietal_4)(lh.precuneus_11)(lh.superiortemporal_2)(lh.superiortemporal_3)       |
| 0.0044  | 2.00E-05 | 0.8231  | 0.91457 | (lh.fusiform_5)(lh.inferiorparietal_4)(lh.lingual_8)(lh.precuneus_11)                        |
| 0.00442 | 2.00E-05 | 0.76534 | 0.86935 | (Brain_Stem)(lh.inferiorparietal_4)(lh.inferiorparietal_5)(lh.insula_2)                      |
| 0.00442 | 2.00E-05 | 0.76534 | 0.86935 | (lh.inferiorparietal_4)(lh.inferiorparietal_5)(lh.lingual_7)                                 |
| 0.00442 | 2.00E-05 | 0.76534 | 0.86935 | (lh.inferiorparietal_5)(lh.insula_2)(lh.supramarginal_1)(lh.transversetemporal_2)            |
| 0.00442 | 2.00E-05 | 0.76534 | 0.86935 | (lh.inferiorparietal_4)(lh.inferiorparietal_5)(lh.isthmuscingulate_3)(lh.lingual_7)          |
| 0.00442 | 2.00E-05 | 0.76534 | 0.86935 | (Brain_Stem)(lh.inferiorparietal_4)(lh.lingual_6)(lh.precuneus_11)                           |
| 0.00442 | 2.00E-05 | 0.76534 | 0.86935 | (Left-Thalamus-Propri)(lh.inferiorparietal_4)(lh.inferiorparietal_5)(lh.lingual_7)           |
| 0.00445 | 2.00E-05 | 0.79061 | 0.88945 | (Left-Putamen)(lh.lingual_6)(lh.precuneus_11)(lh.supramarginal_1)                            |
| 0.00456 | 2.00E-05 | 0.74729 | 0.85427 | (lh.inferiorparietal_4)(lh.inferiorparietal_5)(lh.insula_4)(lh.lingual_6)                    |
| 0.00456 | 2.00E-05 | 0.74729 | 0.85427 | (lh.inferiorparietal_4)(lh.precuneus_11)(lh.superiortemporal_3)(lh.superiortemporal_8)       |
| 0.00456 | 2.00E-05 | 0.74729 | 0.85427 | (Left-Pallidum)(lh.inferiorparietal_5)(lh.supramarginal_1)(lh.transversetemporal_2)          |
| 0.00456 | 2.00E-05 | 0.74729 | 0.85427 | (lh.inferiorparietal_4)(lh.inferiorparietal_5)(lh.superiortemporal_2)(lh.superiortemporal_8) |
| 0.00456 | 2.00E-05 | 0.74729 | 0.85427 | (lh.inferiorparietal_4)(lh.lingual_7)(lh.parahippocampal_3)(lh.precuneus_11)                 |
| 0.00456 | 2.00E-05 | 0.74729 | 0.85427 | (lh.inferiorparietal_4)(lh.inferiorparietal_5)(lh.lingual_7)(lh.superiortemporal_3)          |
| 0.00458 | 2.00E-05 | 0.83032 | 0.9196  | (Left-Putamen)(lh.fusiform_5)(lh.inferiorparietal_4)(lh.precuneus_11)                        |
| 0.00459 | 2.00E-05 | 0.72924 | 0.8392  | (lh.inferiorparietal_4)(lh.inferiorparietal_5)(lh.parahippocampal_3)(lh.superiortemporal_8)  |
| 0.00459 | 2.00E-05 | 0.72924 | 0.8392  | (lh.entorhinal_1)(lh.inferiorparietal_4)(lh.inferiorparietal_5)(lh.precuneus_11)             |
| 0.00459 | 2.00E-05 | 0.72924 | 0.8392  | (lh.inferiorparietal_4)(lh.precuneus_11)(lh.superiortemporal_8)(lh.transversetemporal_2)     |
| 0.00466 | 2.00E-05 | 0.89531 | 0.96482 | (lh.bankssts_3)(lh.inferiorparietal_5)(lh.insula_2)(lh.precuneus_11)                         |
| 0.00474 | 2.00E-05 | 0.79783 | 0.89447 | (Left-Pallidum)(lh.fusiform_5)(lh.inferiorparietal_4)(lh.inferiorparietal_5)                 |
| 0.00474 | 2.00E-05 | 0.79783 | 0.89447 | (lh.inferiorparietal_4)(lh.inferiorparietal_5)(lh.insula_2)(lh.parahippocampal_3)            |
| 0.00477 | 2.00E-05 | 0.77256 | 0.87437 | (lh.inferiorparietal_5)(lh.superiortemporal_2)(lh.supramarginal_1)(lh.transversetemporal_2)  |
| 0.00477 | 2.00E-05 | 0.77256 | 0.87437 | (Brain_Stem)(Left-Putamen)(lh.inferiorparietal_4)(lh.inferiorparietal_5)                     |
| 0.00477 | 2.00E-05 | 0.77256 | 0.87437 | (Left-Thalamus-Propri)(lh.inferiorparietal_4)(lh.lingual_7)(lh.precuneus_11)                 |
| 0.00477 | 2.00E-05 | 0.77256 | 0.87437 | (lh.inferiorparietal_4)(lh.isthmuscingulate_3)(lh.lingual_7)(lh.precuneus_11)                |
| 0.00477 | 2.00E-05 | 0.77256 | 0.87437 | (lh.inferiorparietal_4)(lh.lingual_7)(lh.precuneus_11)                                       |
| 0.00477 | 2.00E-05 | 0.77256 | 0.87437 | (Left-Thalamus-Propri)(lh.inferiorparietal_5)(lh.supramarginal_1)(lh.transversetemporal_2)   |
| 0.00483 | 2.00E-05 | 0.70036 | 0.81407 | (lh.fusiform_6)(lh.precuneus_11)(lh.superiortemporal_3)(lh.supramarginal_1)                  |
| 0.0049  | 2.00E-05 | 0.88809 | 0.9598  | (lh.inferiorparietal_5)(lh.precuneus_11)(lh.superiortemporal_2)(lh.transversetemporal_2)     |

|         |          |         |         |                                                                                        |
|---------|----------|---------|---------|----------------------------------------------------------------------------------------|
| 0.00495 | 2.00E-05 | 0.75451 | 0.8593  | (lh.inferiorparietal_4)(lh.lingual_7)(lh.precuneus_11)(lh.superiortemporal_3)          |
| 0.00495 | 2.00E-05 | 0.75451 | 0.8593  | (lh.inferiorparietal_4)(lh.precuneus_11)(lh.superiortemporal_2)(lh.superiortemporal_8) |
| 0.00495 | 2.00E-05 | 0.75451 | 0.8593  | (lh.fusiform_7)(lh.inferiorparietal_4)(lh.inferiorparietal_5)(lh.insula_4)             |
| 0.00495 | 2.00E-05 | 0.75451 | 0.8593  | (lh.inferiorparietal_4)(lh.inferiorparietal_5)(lh.lingual_7)(lh.lingual_8)             |
| 0.00495 | 2.00E-05 | 0.75451 | 0.8593  | (lh.inferiorparietal_4)(lh.inferiorparietal_5)(lh.parahippocampal_2)(lh.precuneus_11)  |
| 0.00497 | 2.00E-05 | 0.92058 | 0.9799  | (lh.inferiorparietal_5)(lh.insula_2)(lh.precuneus_11)(lh.superiortemporal_2)           |
| 0.00497 | 2.00E-05 | 0.92058 | 0.9799  | (Left-Putamen)(lh.fusiform_5)(lh.inferiorparietal_5)(lh.precuneus_11)                  |
| 0.00501 | 2.00E-05 | 0.73646 | 0.84422 | (lh.fusiform_6)(lh.inferiorparietal_4)(lh.inferiorparietal_5)(lh.insula_2)             |
| 0.00501 | 2.00E-05 | 0.73646 | 0.84422 | (lh.inferiorparietal_4)(lh.inferiorparietal_5)(lh.lingual_6)(lh.parahippocampal_1)     |
| 0.00501 | 2.00E-05 | 0.73646 | 0.84422 | (lh.inferiorparietal_4)(lh.parahippocampal_3)(lh.precuneus_11)(lh.superiortemporal_8)  |
| 0.00503 | 2.00E-05 | 0.80505 | 0.8995  | (Left-Pallidum)(lh.fusiform_5)(lh.inferiorparietal_4)(lh.precuneus_11)                 |
| 0.00503 | 2.00E-05 | 0.80505 | 0.8995  | (lh.isthmuscingulate_3)(lh.precuneus_11)(lh.superiortemporal_2)(lh.supramarginal_1)    |
| 0.00503 | 2.00E-05 | 0.80505 | 0.8995  | (Left-Thalamus-Proper)(lh.isthmuscingulate_3)(lh.precuneus_11)(lh.supramarginal_1)     |
| 0.00503 | 2.00E-05 | 0.80505 | 0.8995  | (Left-Putamen)(lh.inferiorparietal_4)(lh.inferiorparietal_5)(lh.parahippocampal_3)     |
| 0.00503 | 2.00E-05 | 0.80505 | 0.8995  | (Left-Thalamus-Proper)(lh.precuneus_11)(lh.superiortemporal_2)(lh.supramarginal_1)     |
| 0.00503 | 2.00E-05 | 0.80505 | 0.8995  | (Left-Pallidum)(lh.inferiorparietal_4)(lh.insula_2)(lh.lingual_6)                      |
| 0.00503 | 2.00E-05 | 0.80505 | 0.8995  | (lh.inferiorparietal_4)(lh.insula_2)(lh.parahippocampal_3)(lh.precuneus_11)            |
| 0.00503 | 2.00E-05 | 0.80505 | 0.8995  | (lh.isthmuscingulate_3)(lh.precuneus_11)(lh.supramarginal_1)                           |
| 0.00503 | 2.00E-05 | 0.80505 | 0.8995  | (lh.precuneus_11)(lh.superiortemporal_2)(lh.supramarginal_1)                           |
| 0.00503 | 2.00E-05 | 0.80505 | 0.8995  | (Left-Thalamus-Proper)(lh.precuneus_11)(lh.supramarginal_1)                            |
| 0.00503 | 2.00E-05 | 0.80505 | 0.8995  | (lh.precuneus_11)(lh.supramarginal_1)                                                  |
| 0.00505 | 2.00E-05 | 0.88087 | 0.95477 | (lh.insula_2)(lh.lingual_6)(lh.precuneus_11)(lh.transversetemporal_2)                  |
| 0.00505 | 2.00E-05 | 0.88087 | 0.95477 | (lh.inferiorparietal_5)(lh.insula_2)(lh.lingual_6)(lh.transversetemporal_2)            |
| 0.00524 | 2.00E-05 | 0.76761 | 0.86935 | (lh.bankssts_3)(lh.fusiform_6)(lh.precuneus_11)(lh.transversetemporal_2)               |
| 0.00532 | 2.00E-05 | 0.70758 | 0.8191  | (lh.fusiform_6)(lh.insula_2)(lh.precuneus_11)(lh.supramarginal_1)                      |
| 0.00533 | 2.00E-05 | 0.81227 | 0.90452 | (lh.inferiorparietal_5)(lh.lingual_7)(lh.precuneus_11)(lh.transversetemporal_2)        |
| 0.00533 | 2.00E-05 | 0.81227 | 0.90452 | (Left-Thalamus-Proper)(lh.bankssts_3)(lh.inferiorparietal_4)(lh.inferiorparietal_5)    |
| 0.00533 | 2.00E-05 | 0.81227 | 0.90452 | (lh.bankssts_3)(lh.inferiorparietal_4)(lh.inferiorparietal_5)                          |
| 0.00533 | 2.00E-05 | 0.81227 | 0.90452 | (lh.bankssts_3)(lh.inferiorparietal_4)(lh.inferiorparietal_5)(lh.isthmuscingulate_3)   |
| 0.00533 | 2.00E-05 | 0.81227 | 0.90452 | (Left-Putamen)(lh.inferiorparietal_4)(lh.parahippocampal_3)(lh.precuneus_11)           |
| 0.00536 | 2.00E-05 | 0.76173 | 0.86432 | (Brain_Stem)(lh.inferiorparietal_4)(lh.inferiorparietal_5)(lh.lingual_8)               |
| 0.00536 | 2.00E-05 | 0.76173 | 0.86432 | (lh.inferiorparietal_4)(lh.lingual_7)(lh.lingual_8)(lh.precuneus_11)                   |
| 0.00536 | 2.00E-05 | 0.76173 | 0.86432 | (lh.fusiform_5)(lh.precuneus_11)(lh.supramarginal_1)(lh.transversetemporal_2)          |
| 0.00536 | 2.00E-05 | 0.76173 | 0.86432 | (Brain_Stem)(Left-Pallidum)(lh.inferiorparietal_4)(lh.precuneus_11)                    |
| 0.00536 | 2.00E-05 | 0.76173 | 0.86432 | (lh.inferiorparietal_5)(lh.lingual_6)(lh.supramarginal_1)(lh.transversetemporal_2)     |
| 0.00544 | 2.00E-05 | 0.72563 | 0.83417 | (lh.inferiorparietal_5)(lh.parahippocampal_2)(lh.precuneus_11)(lh.supramarginal_1)     |

|         |          |         |         |                                                                                               |
|---------|----------|---------|---------|-----------------------------------------------------------------------------------------------|
| 0.00544 | 2.00E-05 | 0.72563 | 0.83417 | (lh.fusiform_7)(lh.insula_4)(lh.precuneus_11)(lh.supramarginal_1)                             |
| 0.00544 | 2.00E-05 | 0.72563 | 0.83417 | (lh.insula_4)(lh.parahippocampal_1)(lh.precuneus_11)(lh.supramarginal_1)                      |
| 0.00544 | 2.00E-05 | 0.72563 | 0.83417 | (lh.fusiform_7)(lh.parahippocampal_1)(lh.precuneus_11)(lh.supramarginal_1)                    |
| 0.00546 | 2.00E-05 | 0.74368 | 0.84925 | (lh.fusiform_5)(lh.inferiorparietal_4)(lh.inferiorparietal_5)(lh.superiortemporal_8)          |
| 0.00546 | 2.00E-05 | 0.74368 | 0.84925 | (lh.fusiform_6)(lh.inferiorparietal_4)(lh.inferiorparietal_5)                                 |
| 0.00546 | 2.00E-05 | 0.74368 | 0.84925 | (lh.lingual_7)(lh.precuneus_11)(lh.supramarginal_1)                                           |
| 0.00546 | 2.00E-05 | 0.74368 | 0.84925 | (lh.parahippocampal_3)(lh.precuneus_11)(lh.supramarginal_1)(lh.transversetemporal_2)          |
| 0.00546 | 2.00E-05 | 0.74368 | 0.84925 | (lh.fusiform_6)(lh.inferiorparietal_4)(lh.insula_2)(lh.precuneus_11)                          |
| 0.00546 | 2.00E-05 | 0.74368 | 0.84925 | (Brain_Stem)(lh.precuneus_11)(lh.superiortemporal_3)(lh.supramarginal_1)                      |
| 0.00546 | 2.00E-05 | 0.74368 | 0.84925 | (lh.isthmuscingulate_3)(lh.lingual_7)(lh.precuneus_11)(lh.supramarginal_1)                    |
| 0.00546 | 2.00E-05 | 0.74368 | 0.84925 | (lh.lingual_7)(lh.precuneus_11)(lh.superiortemporal_2)(lh.supramarginal_1)                    |
| 0.00546 | 2.00E-05 | 0.74368 | 0.84925 | (Left-Thalamus-Proper)(lh.lingual_7)(lh.precuneus_11)(lh.supramarginal_1)                     |
| 0.00546 | 2.00E-05 | 0.74368 | 0.84925 | (Left-Amygdala)(Left-Pallidum)(lh.inferiorparietal_4)(lh.inferiorparietal_5)                  |
| 0.00546 | 2.00E-05 | 0.74368 | 0.84925 | (lh.fusiform_6)(lh.inferiorparietal_4)(lh.inferiorparietal_5)(lh.isthmuscingulate_3)          |
| 0.00546 | 2.00E-05 | 0.74368 | 0.84925 | (Left-Putamen)(lh.fusiform_6)(lh.inferiorparietal_4)(lh.inferiorparietal_5)                   |
| 0.00546 | 2.00E-05 | 0.74368 | 0.84925 | (lh.inferiorparietal_4)(lh.lingual_8)(lh.parahippocampal_1)(lh.precuneus_11)                  |
| 0.00546 | 2.00E-05 | 0.74368 | 0.84925 | (Left-Thalamus-Proper)(lh.fusiform_6)(lh.inferiorparietal_4)(lh.inferiorparietal_5)           |
| 0.00546 | 2.00E-05 | 0.74368 | 0.84925 | (Left-Amygdala)(lh.inferiorparietal_4)(lh.lingual_6)(lh.precuneus_11)                         |
| 0.0055  | 2.00E-05 | 0.787   | 0.88442 | (lh.fusiform_5)(lh.insula_2)(lh.precuneus_11)(lh.supramarginal_1)                             |
| 0.00558 | 2.00E-05 | 0.77465 | 0.87437 | (Left-Pallidum)(lh.inferiorparietal_4)(lh.lingual_6)(lh.transversetemporal_2)                 |
| 0.00558 | 2.00E-05 | 0.77465 | 0.87437 | (lh.bankssts_3)(lh.inferiorparietal_4)(lh.lingual_6)(lh.parahippocampal_3)                    |
| 0.00558 | 2.00E-05 | 0.77465 | 0.87437 | (lh.inferiorparietal_4)(lh.inferiorparietal_5)(lh.parahippocampal_3)(lh.transversetemporal_2) |
| 0.00558 | 2.00E-05 | 0.77465 | 0.87437 | (lh.bankssts_3)(lh.inferiorparietal_4)(lh.lingual_8)(lh.parahippocampal_3)                    |
| 0.00558 | 2.00E-05 | 0.77465 | 0.87437 | (lh.bankssts_3)(lh.inferiorparietal_4)(lh.lingual_8)(lh.transversetemporal_2)                 |
| 0.00558 | 2.00E-05 | 0.77465 | 0.87437 | (lh.bankssts_3)(lh.inferiorparietal_4)(lh.lingual_6)(lh.transversetemporal_2)                 |
| 0.00562 | 2.00E-05 | 0.81949 | 0.90955 | (Left-Thalamus-Proper)(lh.bankssts_3)(lh.inferiorparietal_4)(lh.precuneus_11)                 |
| 0.00562 | 2.00E-05 | 0.81949 | 0.90955 | (lh.bankssts_3)(lh.inferiorparietal_4)(lh.precuneus_11)                                       |
| 0.00562 | 2.00E-05 | 0.81949 | 0.90955 | (lh.inferiorparietal_4)(lh.inferiorparietal_5)(lh.lingual_8)(lh.superiortemporal_2)           |
| 0.00562 | 2.00E-05 | 0.81949 | 0.90955 | (lh.bankssts_3)(lh.inferiorparietal_4)(lh.isthmuscingulate_3)(lh.precuneus_11)                |
| 0.00565 | 2.00E-05 | 0.91336 | 0.97487 | (Left-Thalamus-Proper)(lh.inferiorparietal_5)(lh.precuneus_11)(lh.superiortemporal_3)         |
| 0.00565 | 2.00E-05 | 0.91336 | 0.97487 | (lh.inferiorparietal_5)(lh.precuneus_11)(lh.superiortemporal_2)(lh.superiortemporal_3)        |
| 0.00565 | 2.00E-05 | 0.91336 | 0.97487 | (lh.inferiorparietal_5)(lh.lingual_6)(lh.precuneus_11)(lh.superiortemporal_2)                 |
| 0.00565 | 2.00E-05 | 0.91336 | 0.97487 | (lh.inferiorparietal_5)(lh.precuneus_11)(lh.superiortemporal_3)                               |
| 0.00565 | 2.00E-05 | 0.91336 | 0.97487 | (lh.fusiform_5)(lh.inferiorparietal_5)(lh.insula_2)(lh.precuneus_11)                          |
| 0.00565 | 2.00E-05 | 0.91336 | 0.97487 | (lh.inferiorparietal_5)(lh.isthmuscingulate_3)(lh.precuneus_11)(lh.superiortemporal_3)        |
| 0.0058  | 2.00E-05 | 0.76895 | 0.86935 | (Left-Putamen)(lh.superiortemporal_3)(lh.supramarginal_1)(lh.transversetemporal_2)            |

|         |          |         |         |                                                                                             |
|---------|----------|---------|---------|---------------------------------------------------------------------------------------------|
| 0.0058  | 2.00E-05 | 0.76895 | 0.86935 | (Left-Pallidum)(lh.fusiform_5)(lh.precuneus_11)(lh.supramarginal_1)                         |
| 0.0058  | 2.00E-05 | 0.76895 | 0.86935 | (Left-Caudate)(lh.inferiorparietal_4)(lh.inferiorparietal_5)(lh.precuneus_11)               |
| 0.0058  | 2.00E-05 | 0.76895 | 0.86935 | (Left-Thalamus-Proper)(lh.superiortemporal_3)(lh.supramarginal_1)(lh.transversetemporal     |
| 0.00584 | 2.00E-05 | 0.7148  | 0.82412 | (lh.inferiorparietal_4)(lh.inferiorparietal_5)(lh parahippocampal_2)(lh.superiortemporal_8) |
| 0.00584 | 2.00E-05 | 0.7148  | 0.82412 | (lh.inferiorparietal_5)(lh.lingual_7)(lh.supramarginal_1)(lh.transversetemporal_2)          |
| 0.00584 | 2.00E-05 | 0.7148  | 0.82412 | (lh.fusiform_6)(lh.isthmuscingulate_3)(lh.precuneus_11)(lh.supramarginal_1)                 |
| 0.00584 | 2.00E-05 | 0.7148  | 0.82412 | (Left-Putamen)(lh.fusiform_6)(lh.precuneus_11)(lh.supramarginal_1)                          |
| 0.00584 | 2.00E-05 | 0.7148  | 0.82412 | (lh.fusiform_6)(lh.precuneus_11)(lh.superiortemporal_2)(lh.supramarginal_1)                 |
| 0.00584 | 2.00E-05 | 0.7148  | 0.82412 | (lh.fusiform_6)(lh.inferiorparietal_4)(lh.inferiorparietal_5)(lh.transversetemporal_2)      |
| 0.00584 | 2.00E-05 | 0.7148  | 0.82412 | (lh.fusiform_6)(lh.precuneus_11)(lh.supramarginal_1)                                        |
| 0.00584 | 2.00E-05 | 0.7148  | 0.82412 | (Left-Thalamus-Proper)(lh.fusiform_6)(lh.precuneus_11)(lh.supramarginal_1)                  |
| 0.00588 | 2.00E-05 | 0.79422 | 0.88945 | (Left-Thalamus-Proper)(lh.inferiorparietal_5)(lh.superiortemporal_3)(lh.supramarginal_1)    |
| 0.00588 | 2.00E-05 | 0.79422 | 0.88945 | (lh.lingual_6)(lh.precuneus_11)(lh.superiortemporal_2)(lh.supramarginal_1)                  |
| 0.00588 | 2.00E-05 | 0.79422 | 0.88945 | (lh.inferiorparietal_5)(lh.superiortemporal_3)(lh.supramarginal_1)                          |
| 0.00588 | 2.00E-05 | 0.79422 | 0.88945 | (lh.lingual_6)(lh.precuneus_11)(lh.supramarginal_1)                                         |
| 0.00588 | 2.00E-05 | 0.79422 | 0.88945 | (lh.inferiorparietal_4)(lh.inferiorparietal_5)(lh.insula_1)(lh.precuneus_11)                |
| 0.00588 | 2.00E-05 | 0.79422 | 0.88945 | (lh.inferiorparietal_5)(lh.superiortemporal_2)(lh.superiortemporal_3)(lh.supramarginal_1)   |
| 0.00588 | 2.00E-05 | 0.79422 | 0.88945 | (Left-Thalamus-Proper)(lh.lingual_6)(lh.precuneus_11)(lh.supramarginal_1)                   |
| 0.00588 | 2.00E-05 | 0.79422 | 0.88945 | (Left-Putamen)(lh.fusiform_5)(lh.precuneus_11)(lh.supramarginal_1)                          |
| 0.00588 | 2.00E-05 | 0.79422 | 0.88945 | (lh.isthmuscingulate_3)(lh.lingual_6)(lh.precuneus_11)(lh.supramarginal_1)                  |
| 0.00588 | 2.00E-05 | 0.79422 | 0.88945 | (Left-Putamen)(lh.inferiorparietal_5)(lh.superiortemporal_3)(lh.supramarginal_1)            |
| 0.00588 | 2.00E-05 | 0.79422 | 0.88945 | (lh.inferiorparietal_5)(lh.isthmuscingulate_3)(lh.superiortemporal_3)(lh.supramarginal_1)   |
| 0.00588 | 2.00E-05 | 0.79422 | 0.88945 | (Left-Pallidum)(lh.inferiorparietal_4)(lh.inferiorparietal_5)(lh.superiortemporal_3)        |
| 0.00588 | 2.00E-05 | 0.79422 | 0.88945 | (lh.inferiorparietal_4)(lh.precuneus_11)(lh.superiortemporal_3)(lh.transversetemporal_2)    |
| 0.0059  | 3.00E-05 | 0.82671 | 0.91457 | (lh.inferiorparietal_4)(lh.insula_2)(lh.lingual_6)                                          |
| 0.0059  | 3.00E-05 | 0.82671 | 0.91457 | (Left-Thalamus-Proper)(lh.inferiorparietal_4)(lh.insula_2)(lh.lingual_6)                    |
| 0.0059  | 3.00E-05 | 0.82671 | 0.91457 | (lh.inferiorparietal_5)(lh.lingual_6)(lh.precuneus_11)(lh.superiortemporal_8)               |
| 0.0059  | 3.00E-05 | 0.82671 | 0.91457 | (lh.inferiorparietal_4)(lh.lingual_8)(lh.precuneus_11)(lh.superiortemporal_2)               |
| 0.0059  | 3.00E-05 | 0.82671 | 0.91457 | (lh.inferiorparietal_4)(lh.insula_2)(lh.isthmuscingulate_3)(lh.lingual_6)                   |
| 0.0059  | 3.00E-05 | 0.82671 | 0.91457 | (Left-Putamen)(lh.inferiorparietal_4)(lh.insula_2)(lh.lingual_6)                            |
| 0.00592 | 3.00E-05 | 0.78169 | 0.8794  | (lh.inferiorparietal_4)(lh parahippocampal_3)(lh.precuneus_11)(lh.transversetemporal_2)     |
| 0.00592 | 3.00E-05 | 0.78169 | 0.8794  | (Left-Pallidum)(lh.bankssts_3)(lh.fusiform_5)(lh.inferiorparietal_4)                        |
| 0.00592 | 3.00E-05 | 0.78169 | 0.8794  | (Left-Pallidum)(lh.inferiorparietal_4)(lh.inferiorparietal_5)(lh parahippocampal_3)         |
| 0.00594 | 3.00E-05 | 0.7509  | 0.85427 | (Left-Thalamus-Proper)(lh.fusiform_6)(lh.inferiorparietal_4)(lh.precuneus_11)               |
| 0.00594 | 3.00E-05 | 0.7509  | 0.85427 | (lh.fusiform_6)(lh.inferiorparietal_4)(lh.precuneus_11)                                     |
| 0.00594 | 3.00E-05 | 0.7509  | 0.85427 | (lh.bankssts_3)(lh.inferiorparietal_5)(lh.supramarginal_1)(lh.transversetemporal_2)         |



|         |          |         |         |                                                                                              |
|---------|----------|---------|---------|----------------------------------------------------------------------------------------------|
| 0.00594 | 3.00E-05 | 0.7509  | 0.85427 | (lh.fusiform_5)(lh.inferiorparietal_4)(lh.precuneus_11)(lh.superiortemporal_8)               |
| 0.00594 | 3.00E-05 | 0.7509  | 0.85427 | (Brain_Stem)(lh.inferiorparietal_5)(lh.precuneus_11)(lh.supramarginal_1)                     |
| 0.00594 | 3.00E-05 | 0.7509  | 0.85427 | (Left-Putamen)(lh.fusiform_6)(lh.inferiorparietal_4)(lh.precuneus_11)                        |
| 0.00594 | 3.00E-05 | 0.7509  | 0.85427 | (lh.fusiform_6)(lh.inferiorparietal_4)(lh.isthmuscingulate_3)(lh.precuneus_11)               |
| 0.00594 | 3.00E-05 | 0.7509  | 0.85427 | (Left-Pallidum)(lh.inferiorparietal_4)(lh.parahippocampal_1)(lh.precuneus_11)                |
| 0.00595 | 3.00E-05 | 0.73285 | 0.8392  | (lh.inferiorparietal_4)(lh.insula_4)(lh.parahippocampal_1)(lh.superiortemporal_8)            |
| 0.00595 | 3.00E-05 | 0.73285 | 0.8392  | (lh.inferiorparietal_4)(lh.inferiorparietal_5)(lh.lateraloccipital_9)(lh.precuneus_11)       |
| 0.00595 | 3.00E-05 | 0.73285 | 0.8392  | (lh.inferiorparietal_4)(lh.inferiorparietal_5)(lh.insula_4)(lh.superiortemporal_8)           |
| 0.00595 | 3.00E-05 | 0.73285 | 0.8392  | (lh.entorhinal_1)(lh.fusiform_7)(lh.inferiorparietal_4)(lh.inferiorparietal_5)               |
| 0.00595 | 3.00E-05 | 0.73285 | 0.8392  | (lh.fusiform_6)(lh.inferiorparietal_4)(lh.lingual_6)(lh.lingual_8)                           |
| 0.00595 | 3.00E-05 | 0.73285 | 0.8392  | (lh.inferiorparietal_5)(lh.lingual_7)(lh.superiortemporal_3)(lh.supramarginal_1)             |
| 0.00609 | 3.00E-05 | 0.93141 | 0.98492 | (Left-Putamen)(lh.lingual_6)(lh.precuneus_11)                                                |
| 0.00609 | 3.00E-05 | 0.93141 | 0.98492 | (Left-Putamen)(lh.isthmuscingulate_3)(lh.lingual_6)(lh.precuneus_11)                         |
| 0.00609 | 3.00E-05 | 0.93141 | 0.98492 | (Left-Putamen)(Left-Thalamus-Proper)(lh.lingual_6)(lh.precuneus_11)                          |
| 0.00617 | 3.00E-05 | 0.83394 | 0.9196  | (lh.inferiorparietal_4)(lh.inferiorparietal_5)(lh.superiortemporal_2)                        |
| 0.00617 | 3.00E-05 | 0.83394 | 0.9196  | (Left-Putamen)(lh.inferiorparietal_4)(lh.lingual_6)                                          |
| 0.00617 | 3.00E-05 | 0.83394 | 0.9196  | (Left-Putamen)(Left-Thalamus-Proper)(lh.inferiorparietal_4)(lh.lingual_6)                    |
| 0.00617 | 3.00E-05 | 0.83394 | 0.9196  | (Left-Thalamus-Proper)(lh.inferiorparietal_4)(lh.inferiorparietal_5)(lh.superiortemporal_2)  |
| 0.00617 | 3.00E-05 | 0.83394 | 0.9196  | (lh.inferiorparietal_4)(lh.inferiorparietal_5)(lh.isthmuscingulate_3)(lh.superiortemporal_2) |
| 0.00617 | 3.00E-05 | 0.83394 | 0.9196  | (Left-Putamen)(lh.inferiorparietal_4)(lh.isthmuscingulate_3)(lh.lingual_6)                   |
| 0.00618 | 3.00E-05 | 0.90614 | 0.96985 | (Left-Putamen)(lh.isthmuscingulate_3)(lh.precuneus_11)(lh.transversetemporal_2)              |
| 0.00618 | 3.00E-05 | 0.90614 | 0.96985 | (Left-Putamen)(Left-Thalamus-Proper)(lh.inferiorparietal_5)(lh.transversetemporal_2)         |
| 0.00618 | 3.00E-05 | 0.90614 | 0.96985 | (Left-Putamen)(lh.precuneus_11)(lh.transversetemporal_2)                                     |
| 0.00618 | 3.00E-05 | 0.90614 | 0.96985 | (Left-Putamen)(lh.inferiorparietal_5)(lh.isthmuscingulate_3)(lh.transversetemporal_2)        |
| 0.00618 | 3.00E-05 | 0.90614 | 0.96985 | (lh.fusiform_5)(lh.inferiorparietal_5)(lh.lingual_6)(lh.precuneus_11)                        |
| 0.00618 | 3.00E-05 | 0.90614 | 0.96985 | (Left-Putamen)(lh.inferiorparietal_5)(lh.transversetemporal_2)                               |
| 0.00618 | 3.00E-05 | 0.90614 | 0.96985 | (lh.inferiorparietal_5)(lh.insula_2)(lh.precuneus_11)(lh.superiortemporal_3)                 |
| 0.00618 | 3.00E-05 | 0.90614 | 0.96985 | (Left-Putamen)(Left-Thalamus-Proper)(lh.precuneus_11)(lh.transversetemporal_2)               |
| 0.00622 | 3.00E-05 | 0.70397 | 0.81407 | (lh.fusiform_6)(lh.lingual_6)(lh.precuneus_11)(lh.supramarginal_1)                           |
| 0.00625 | 3.00E-05 | 0.77617 | 0.87437 | (Brain_Stem)(lh.inferiorparietal_4)(lh.insula_2)(lh.precuneus_11)                            |
| 0.00625 | 3.00E-05 | 0.77617 | 0.87437 | (Brain_Stem)(Left-Thalamus-Proper)(lh.inferiorparietal_4)(lh.inferiorparietal_5)             |
| 0.00627 | 3.00E-05 | 0.78873 | 0.88442 | (lh.bankssts_3)(lh.inferiorparietal_4)(lh.isthmuscingulate_3)(lh.parahippocampal_3)          |
| 0.00627 | 3.00E-05 | 0.78873 | 0.88442 | (Left-Putamen)(lh.inferiorparietal_5)(lh.lateraloccipital_9)(lh.transversetemporal_2)        |
| 0.00627 | 3.00E-05 | 0.78873 | 0.88442 | (lh.bankssts_3)(lh.inferiorparietal_4)(lh.transversetemporal_2)                              |
| 0.00627 | 3.00E-05 | 0.78873 | 0.88442 | (Left-Pallidum)(lh.inferiorparietal_4)(lh.parahippocampal_3)(lh.precuneus_11)                |
| 0.00627 | 3.00E-05 | 0.78873 | 0.88442 | (lh.bankssts_3)(lh.inferiorparietal_4)(lh.parahippocampal_3)                                 |

|         |          |         |         |                                                                                                |
|---------|----------|---------|---------|------------------------------------------------------------------------------------------------|
| 0.00627 | 3.00E-05 | 0.78873 | 0.88442 | (lh.bankssts_3)(lh.inferiorparietal_4)(lh.isthmuscingulate_3)(lh.transversetemporal_2)         |
| 0.00627 | 3.00E-05 | 0.80144 | 0.89447 | (lh.inferiorparietal_4)(lh.inferiorparietal_5)(lh.superiortemporal_2)(lh.transversetemporal_2) |
| 0.00627 | 3.00E-05 | 0.80144 | 0.89447 | (lh.inferiorparietal_4)(lh.lingual_8)(lh.parahippocampal_3)(lh.precuneus_11)                   |
| 0.00627 | 3.00E-05 | 0.80144 | 0.89447 | (Left-Pallidum)(lh.inferiorparietal_4)(lh.precuneus_11)(lh.superiortemporal_3)                 |
| 0.00627 | 3.00E-05 | 0.80144 | 0.89447 | (lh.inferiorparietal_4)(lh.inferiorparietal_5)(lh.isthmuscingulate_2)(lh.lingual_6)            |
| 0.00641 | 3.00E-05 | 0.72202 | 0.82915 | (lh.inferiorparietal_4)(lh.lingual_6)(lh.parahippocampal_1)(lh.superiortemporal_8)             |
| 0.00641 | 3.00E-05 | 0.72202 | 0.82915 | (lh.bankssts_3)(lh.fusiform_6)(lh.inferiorparietal_4)(lh.inferiorparietal_5)                   |
| 0.00641 | 3.00E-05 | 0.72202 | 0.82915 | (lh.lingual_7)(lh.parahippocampal_3)(lh.precuneus_11)(lh.supramarginal_1)                      |
| 0.00641 | 3.00E-05 | 0.72202 | 0.82915 | (lh.inferiorparietal_4)(lh.inferiorparietal_5)(lh.lateraloccipital_9)(lh.lingual_6)            |
| 0.00641 | 3.00E-05 | 0.72202 | 0.82915 | (lh.fusiform_6)(lh.inferiorparietal_4)(lh.precuneus_11)(lh.transversetemporal_2)               |
| 0.00641 | 3.00E-05 | 0.84116 | 0.92462 | (lh.inferiorparietal_5)(lh.insula_2)(lh.lingual_7)(lh.precuneus_11)                            |
| 0.00641 | 3.00E-05 | 0.84116 | 0.92462 | (lh.inferiorparietal_4)(lh.precuneus_11)(lh.superiortemporal_2)                                |
| 0.00641 | 3.00E-05 | 0.84116 | 0.92462 | (lh.fusiform_7)(lh.insula_4)(lh.parahippocampal_1)(lh.precuneus_11)                            |
| 0.00641 | 3.00E-05 | 0.84116 | 0.92462 | (Left-Thalamus-Proper)(lh.inferiorparietal_4)(lh.precuneus_11)(lh.superiortemporal_2)          |
| 0.00641 | 3.00E-05 | 0.84116 | 0.92462 | (lh.inferiorparietal_4)(lh.isthmuscingulate_3)(lh.precuneus_11)(lh.superiortemporal_2)         |
| 0.00645 | 3.00E-05 | 0.75812 | 0.8593  | (Left-Pallidum)(lh.insula_2)(lh.supramarginal_1)(lh.transversetemporal_2)                      |
| 0.00645 | 3.00E-05 | 0.75812 | 0.8593  | (Left-Thalamus-Proper)(lh.inferiorparietal_4)(lh.parahippocampal_1)(lh.precuneus_11)           |
| 0.00645 | 3.00E-05 | 0.75812 | 0.8593  | (lh.lingual_6)(lh.superiortemporal_3)(lh.supramarginal_1)(lh.transversetemporal_2)             |
| 0.00645 | 3.00E-05 | 0.75812 | 0.8593  | (Left-Putamen)(lh.inferiorparietal_4)(lh.parahippocampal_1)(lh.precuneus_11)                   |
| 0.00645 | 3.00E-05 | 0.75812 | 0.8593  | (Brain_Stem)(lh.inferiorparietal_4)(lh.inferiorparietal_5)(lh.superiortemporal_3)              |
| 0.00645 | 3.00E-05 | 0.75812 | 0.8593  | (lh.inferiorparietal_4)(lh.insula_2)(lh.parahippocampal_1)(lh.precuneus_11)                    |
| 0.00649 | 3.00E-05 | 0.74007 | 0.84422 | (lh.entorhinal_1)(lh.fusiform_7)(lh.inferiorparietal_4)(lh.precuneus_11)                       |
| 0.00649 | 3.00E-05 | 0.74007 | 0.84422 | (lh.fusiform_7)(lh.inferiorparietal_4)(lh.lingual_6)(lh.superiortemporal_8)                    |
| 0.00649 | 3.00E-05 | 0.74007 | 0.84422 | (lh.inferiorparietal_4)(lh.inferiorparietal_5)(lh.lingual_8)(lh.parahippocampal_1)             |
| 0.00649 | 3.00E-05 | 0.74007 | 0.84422 | (Left-Amygdala)(lh.inferiorparietal_4)(lh.inferiorparietal_5)(lh.lingual_8)                    |
| 0.00649 | 3.00E-05 | 0.74007 | 0.84422 | (lh.inferiorparietal_4)(lh.insula_4)(lh.precuneus_11)(lh.superiortemporal_8)                   |
| 0.00649 | 3.00E-05 | 0.74007 | 0.84422 | (Brain_Stem)(Left-Pallidum)(lh.precuneus_11)(lh.supramarginal_1)                               |
| 0.00662 | 3.00E-05 | 0.79577 | 0.88945 | (lh.inferiorparietal_4)(lh.inferiorparietal_5)(lh.lingual_8)(lh.parahippocampal_3)             |
| 0.00662 | 3.00E-05 | 0.79577 | 0.88945 | (lh.inferiorparietal_4)(lh.insula_2)(lh.lingual_6)(lh.transversetemporal_2)                    |
| 0.00662 | 3.00E-05 | 0.79577 | 0.88945 | (lh.inferiorparietal_4)(lh.inferiorparietal_5)(lh.lingual_8)(lh.transversetemporal_2)          |
| 0.00662 | 3.00E-05 | 0.79577 | 0.88945 | (lh.bankssts_3)(lh.inferiorparietal_4)(lh.lingual_6)(lh.lingual_8)                             |
| 0.00662 | 3.00E-05 | 0.79577 | 0.88945 | (Left-Pallidum)(lh.inferiorparietal_4)(lh.lingual_6)(lh.lingual_8)                             |
| 0.00664 | 3.00E-05 | 0.84838 | 0.92965 | (Left-Putamen)(lh.inferiorparietal_5)(lh.lingual_7)(lh.precuneus_11)                           |
| 0.00667 | 3.00E-05 | 0.80866 | 0.8995  | (Left-Pallidum)(lh.inferiorparietal_4)(lh.lingual_6)                                           |
| 0.00667 | 3.00E-05 | 0.80866 | 0.8995  | (lh.inferiorparietal_5)(lh.precuneus_11)(lh.superiortemporal_8)(lh.transversetemporal_2)       |
| 0.00667 | 3.00E-05 | 0.80866 | 0.8995  | (lh.inferiorparietal_4)(lh.precuneus_11)(lh.superiortemporal_2)(lh.transversetemporal_2)       |

|         |          |         |                                                                                                    |
|---------|----------|---------|----------------------------------------------------------------------------------------------------|
| 0.00667 | 3.00E-05 | 0.80866 | 0.8995 (Left-Pallidum)(Left-Thalamus-Propri)(lh.inferiorparietal_4)(lh.lingual_6)                  |
| 0.00667 | 3.00E-05 | 0.80866 | 0.8995 (lh.inferiorparietal_4)(lh.inferiorparietal_5)(lh.insula_2)(lh.isthmuscingulate_2)          |
| 0.00667 | 3.00E-05 | 0.80866 | 0.8995 (Left-Pallidum)(lh.inferiorparietal_4)(lh.isthmuscingulate_3)(lh.lingual_6)                 |
| 0.00667 | 3.00E-05 | 0.80866 | 0.8995 (lh.inferiorparietal_4)(lh.inferiorparietal_5)(lh.isthmuscingulate_3)(lh.parahippocampal_3) |
| 0.00667 | 3.00E-05 | 0.80866 | 0.8995 (Left-Pallidum)(Left-Putamen)(lh.inferiorparietal_4)(lh.lingual_6)                          |
| 0.00667 | 3.00E-05 | 0.80866 | 0.8995 (Left-Thalamus-Propri)(lh.inferiorparietal_4)(lh.inferiorparietal_5)(lh.parahippocampal_3)  |
| 0.00667 | 3.00E-05 | 0.80866 | 0.8995 (lh.inferiorparietal_4)(lh.isthmuscingulate_2)(lh.lingual_6)(lh.precuneus_11)               |
| 0.00667 | 3.00E-05 | 0.80866 | 0.8995 (lh.inferiorparietal_4)(lh.inferiorparietal_5)(lh.parahippocampal_3)                        |
| 0.00673 | 3.00E-05 | 0.78339 | 0.8794 (Left-Putamen)(lh.superiortemporal_2)(lh.supramarginal_1)(lh.transversetemporal_2)          |
| 0.00673 | 3.00E-05 | 0.78339 | 0.8794 (lh.inferiorparietal_5)(lh.lingual_6)(lh.superiortemporal_3)(lh.supramarginal_1)            |
| 0.00673 | 3.00E-05 | 0.78339 | 0.8794 (Left-Thalamus-Propri)(lh.bankssts_3)(lh.precuneus_11)(lh.supramarginal_1)                  |
| 0.00673 | 3.00E-05 | 0.78339 | 0.8794 (lh.bankssts_3)(lh.isthmuscingulate_3)(lh.precuneus_11)(lh.supramarginal_1)                 |
| 0.00673 | 3.00E-05 | 0.78339 | 0.8794 (Left-Putamen)(Left-Thalamus-Propri)(lh.supramarginal_1)(lh.transversetemporal_2)           |
| 0.00673 | 3.00E-05 | 0.78339 | 0.8794 (lh.bankssts_3)(lh.precuneus_11)(lh.supramarginal_1)                                        |
| 0.00673 | 3.00E-05 | 0.78339 | 0.8794 (lh.bankssts_3)(lh.precuneus_11)(lh.superiortemporal_2)(lh.supramarginal_1)                 |
| 0.00673 | 3.00E-05 | 0.78339 | 0.8794 (Left-Putamen)(lh.supramarginal_1)(lh.transversetemporal_2)                                 |
| 0.00673 | 3.00E-05 | 0.78339 | 0.8794 (Brain_Stem)(Left-Putamen)(lh.inferiorparietal_4)(lh.precuneus_11)                          |
| 0.00673 | 3.00E-05 | 0.78339 | 0.8794 (Left-Putamen)(lh.isthmuscingulate_3)(lh.supramarginal_1)(lh.transversetemporal_2)          |
| 0.00684 | 3.00E-05 | 0.71119 | 0.8191 (lh.fusiform_5)(lh.fusiform_6)(lh.precuneus_11)(lh.supramarginal_1)                         |
| 0.00684 | 3.00E-05 | 0.71119 | 0.8191 (lh.lingual_7)(lh.superiortemporal_3)(lh.supramarginal_1)(lh.transversetemporal_2)          |
| 0.00685 | 3.00E-05 | 0.8917  | 0.9598 (lh.inferiorparietal_5)(lh.lingual_6)(lh.transversetemporal_2)                              |
| 0.00685 | 3.00E-05 | 0.8917  | 0.9598 (Left-Thalamus-Propri)(lh.inferiorparietal_5)(lh.lingual_6)(lh.transversetemporal_2)        |
| 0.00685 | 3.00E-05 | 0.8917  | 0.9598 (lh.lingual_6)(lh.precuneus_11)(lh.transversetemporal_2)                                    |
| 0.00685 | 3.00E-05 | 0.8917  | 0.9598 (lh.isthmuscingulate_3)(lh.lingual_6)(lh.precuneus_11)(lh.transversetemporal_2)             |
| 0.00685 | 3.00E-05 | 0.8917  | 0.9598 (lh.bankssts_3)(lh.inferiorparietal_5)(lh.lingual_6)(lh.precuneus_11)                       |
| 0.00685 | 3.00E-05 | 0.8917  | 0.9598 (Left-Thalamus-Propri)(lh.lingual_6)(lh.precuneus_11)(lh.transversetemporal_2)              |
| 0.00685 | 3.00E-05 | 0.8917  | 0.9598 (lh.inferiorparietal_5)(lh.isthmuscingulate_3)(lh.lingual_6)(lh.transversetemporal_2)       |
| 0.00697 | 3.00E-05 | 0.86282 | 0.9397 (lh.inferiorparietal_5)(lh.parahippocampal_3)(lh.precuneus_11)(lh.transversetemporal_2)     |
| 0.00697 | 3.00E-05 | 0.86282 | 0.9397 (Left-Pallidum)(lh.lingual_6)(lh.precuneus_11)(lh.transversetemporal_2)                     |
| 0.00697 | 3.00E-05 | 0.86282 | 0.9397 (Left-Pallidum)(lh.inferiorparietal_5)(lh.lingual_6)(lh.transversetemporal_2)               |
| 0.00699 | 3.00E-05 | 0.76534 | 0.86432 (lh.inferiorparietal_4)(lh.inferiorparietal_5)(lh.lingual_7)(lh.superiortemporal_2)        |
| 0.00699 | 4.00E-05 | 0.76534 | 0.86432 (lh.insula_2)(lh.superiortemporal_3)(lh.supramarginal_1)(lh.transversetemporal_2)          |
| 0.00701 | 4.00E-05 | 0.88448 | 0.95477 (lh.fusiform_5)(lh.inferiorparietal_5)(lh.precuneus_11)(lh.transversetemporal_2)           |
| 0.00702 | 4.00E-05 | 0.72924 | 0.83417 (lh.bankssts_3)(lh.fusiform_6)(lh.inferiorparietal_4)(lh.precuneus_11)                     |
| 0.00702 | 4.00E-05 | 0.72924 | 0.83417 (Left-Caudate)(lh.precuneus_11)(lh.supramarginal_1)(lh.transversetemporal_2)               |
| 0.00702 | 4.00E-05 | 0.72924 | 0.83417 (lh.inferiorparietal_5)(lh.insula_4)(lh.precuneus_11)(lh.supramarginal_1)                  |

|         |          |         |         |                                                                                         |
|---------|----------|---------|---------|-----------------------------------------------------------------------------------------|
| 0.00702 | 4.00E-05 | 0.72924 | 0.83417 | (Brain_Stem)(lh.precuneus_11)(lh.supramarginal_1)(lh.transversetemporal_2)              |
| 0.00702 | 4.00E-05 | 0.72924 | 0.83417 | (lh.inferiorparietal_4)(lh.insula_1)(lh.precuneus_11)(lh.superiortemporal_8)            |
| 0.00702 | 4.00E-05 | 0.72924 | 0.83417 | (lh.inferiorparietal_4)(lh.inferiorparietal_5)(lh.insula_2)(lh.lateraloccipital_9)      |
| 0.00702 | 4.00E-05 | 0.72924 | 0.83417 | (lh.inferiorparietal_4)(lh.parahippocampal_1)(lh.precuneus_11)(lh.transversetemporal_2) |
| 0.00702 | 4.00E-05 | 0.72924 | 0.83417 | (lh.inferiorparietal_4)(lh.inferiorparietal_5)(lh.lateraloccipital_9)(lh.lingual_8)     |
| 0.00702 | 4.00E-05 | 0.72924 | 0.83417 | (Left-Amygdala)(lh.inferiorparietal_5)(lh.precuneus_11)(lh.supramarginal_1)             |
| 0.00705 | 4.00E-05 | 0.87004 | 0.94472 | (lh.inferiorparietal_5)(lh.lingual_8)(lh.precuneus_11)(lh.transversetemporal_2)         |
| 0.00707 | 4.00E-05 | 0.87726 | 0.94975 | (Left-Pallidum)(lh.bankssts_3)(lh.inferiorparietal_5)(lh.precuneus_11)                  |
| 0.00708 | 4.00E-05 | 0.74729 | 0.84925 | (Left-Pallidum)(lh.inferiorparietal_4)(lh.lingual_6)(lh.superiortemporal_8)             |
| 0.00708 | 4.00E-05 | 0.74729 | 0.84925 | (lh.fusiform_7)(lh.inferiorparietal_4)(lh.lingual_6)(lh.parahippocampal_1)              |
| 0.00708 | 4.00E-05 | 0.74729 | 0.84925 | (lh.bankssts_3)(lh.superiortemporal_3)(lh.supramarginal_1)(lh.transversetemporal_2)     |
| 0.00708 | 4.00E-05 | 0.74729 | 0.84925 | (Brain_Stem)(lh.inferiorparietal_4)(lh.inferiorparietal_5)(lh.transversetemporal_2)     |
| 0.00708 | 4.00E-05 | 0.74729 | 0.84925 | (lh.inferiorparietal_4)(lh.insula_4)(lh.lingual_6)(lh.parahippocampal_1)                |
| 0.00708 | 4.00E-05 | 0.74729 | 0.84925 | (Left-Pallidum)(lh.inferiorparietal_4)(lh.inferiorparietal_5)(lh.parahippocampal_1)     |
| 0.00708 | 4.00E-05 | 0.81588 | 0.90452 | (lh.inferiorparietal_4)(lh.insula_2)(lh.isthmuscingulate_2)(lh.precuneus_11)            |
| 0.00708 | 4.00E-05 | 0.81588 | 0.90452 | (Left-Thalamus-Proper)(lh.inferiorparietal_4)(lh.parahippocampal_3)(lh.precuneus_11)    |
| 0.00708 | 4.00E-05 | 0.81588 | 0.90452 | (lh.inferiorparietal_4)(lh.isthmuscingulate_3)(lh.parahippocampal_3)(lh.precuneus_11)   |
| 0.00708 | 4.00E-05 | 0.81588 | 0.90452 | (lh.inferiorparietal_4)(lh.insula_2)(lh.lingual_6)(lh.lingual_8)                        |
| 0.00708 | 4.00E-05 | 0.81588 | 0.90452 | (Left-Putamen)(lh.inferiorparietal_4)(lh.inferiorparietal_5)(lh.isthmuscingulate_2)     |
| 0.00708 | 4.00E-05 | 0.81588 | 0.90452 | (lh.inferiorparietal_4)(lh.parahippocampal_3)(lh.precuneus_11)                          |
| 0.0072  | 4.00E-05 | 0.92419 | 0.9799  | (lh.insula_2)(lh.isthmuscingulate_3)(lh.lingual_6)(lh.precuneus_11)                     |
| 0.0072  | 4.00E-05 | 0.92419 | 0.9799  | (Left-Thalamus-Proper)(lh.insula_2)(lh.lingual_6)(lh.precuneus_11)                      |
| 0.0072  | 4.00E-05 | 0.92419 | 0.9799  | (lh.insula_2)(lh.lingual_6)(lh.precuneus_11)                                            |
| 0.0072  | 4.00E-05 | 0.92419 | 0.9799  | (Left-Putamen)(lh.insula_2)(lh.lingual_6)(lh.precuneus_11)                              |
| 0.00722 | 4.00E-05 | 0.79061 | 0.88442 | (Left-Pallidum)(lh.inferiorparietal_4)(lh.inferiorparietal_5)(lh.isthmuscingulate_2)    |
| 0.00722 | 4.00E-05 | 0.79061 | 0.88442 | (lh.inferiorparietal_5)(lh.insula_2)(lh.superiortemporal_3)(lh.supramarginal_1)         |
| 0.00722 | 4.00E-05 | 0.79061 | 0.88442 | (lh.fusiform_6)(lh.inferiorparietal_5)(lh.precuneus_11)(lh.transversetemporal_2)        |
| 0.00748 | 4.00E-05 | 0.8231  | 0.90955 | (lh.bankssts_3)(lh.inferiorparietal_5)(lh.precuneus_11)(lh.superiortemporal_8)          |
| 0.00748 | 4.00E-05 | 0.8231  | 0.90955 | (Left-Pallidum)(lh.inferiorparietal_5)(lh.lingual_7)(lh.precuneus_11)                   |
| 0.00748 | 4.00E-05 | 0.8231  | 0.90955 | (Left-Putamen)(lh.inferiorparietal_4)(lh.isthmuscingulate_2)(lh.precuneus_11)           |
| 0.00748 | 4.00E-05 | 0.8231  | 0.90955 | (Left-Putamen)(lh.inferiorparietal_4)(lh.lingual_6)(lh.lingual_8)                       |
| 0.00751 | 4.00E-05 | 0.71841 | 0.82412 | (lh.bankssts_3)(lh.inferiorparietal_4)(lh.parahippocampal_1)(lh.superiortemporal_8)     |
| 0.00751 | 4.00E-05 | 0.71841 | 0.82412 | (Brain_Stem)(lh.inferiorparietal_4)(lh.inferiorparietal_5)(lh.lingual_7)                |
| 0.00756 | 4.00E-05 | 0.77256 | 0.86935 | (Left-Putamen)(lh.lingual_6)(lh.supramarginal_1)(lh.transversetemporal_2)               |
| 0.00756 | 4.00E-05 | 0.77256 | 0.86935 | (lh.isthmuscingulate_2)(lh.precuneus_11)(lh.superiortemporal_3)(lh.supramarginal_1)     |
| 0.00756 | 4.00E-05 | 0.77256 | 0.86935 | (lh.lingual_8)(lh.precuneus_11)(lh.superiortemporal_3)(lh.supramarginal_1)              |

|         |          |         |         |                                                                                              |
|---------|----------|---------|---------|----------------------------------------------------------------------------------------------|
| 0.00756 | 4.00E-05 | 0.77256 | 0.86935 | (lh.inferiorparietal_4)(lh.lingual_7)(lh.precuneus_11)(lh.superiortemporal_2)                |
| 0.00756 | 4.00E-05 | 0.77256 | 0.86935 | (Brain_Stem)(lh.inferiorparietal_4)(lh.lingual_8)(lh.precuneus_11)                           |
| 0.00761 | 4.00E-05 | 0.95307 | 0.99497 | (Left-Putamen)(Left-Thalamus-Proper)(lh.isthmuscingulate_3)(lh.precuneus_11)                 |
| 0.00761 | 4.00E-05 | 0.95307 | 0.99497 | (Left-Putamen)(Left-Thalamus-Proper)(lh.precuneus_11)                                        |
| 0.00761 | 4.00E-05 | 0.95307 | 0.99497 | (Left-Putamen)(lh.isthmuscingulate_3)(lh.precuneus_11)                                       |
| 0.00761 | 4.00E-05 | 0.95307 | 0.99497 | (Left-Putamen)(lh.precuneus_11)                                                              |
| 0.00767 | 4.00E-05 | 0.73646 | 0.8392  | (lh.bankssts_3)(lh.inferiorparietal_4)(lh.lingual_6)(lh.superiortemporal_8)                  |
| 0.00767 | 4.00E-05 | 0.73646 | 0.8392  | (Left-Putamen)(lh.inferiorparietal_4)(lh.inferiorparietal_5)(lh.lateraloccipital_9)          |
| 0.00767 | 4.00E-05 | 0.73646 | 0.8392  | (lh.fusiform_7)(lh.insula_4)(lh.parahippocampal_1)(lh.supramarginal_1)                       |
| 0.00767 | 4.00E-05 | 0.73646 | 0.8392  | (lh.inferiorparietal_4)(lh.inferiorparietal_5)(lh.isthmuscingulate_2)(lh.superiortemporal_8) |
| 0.00767 | 4.00E-05 | 0.73646 | 0.8392  | (lh.bankssts_3)(lh.inferiorparietal_4)(lh.parahippocampal_1)(lh.precuneus_11)                |
| 0.00767 | 4.00E-05 | 0.73646 | 0.8392  | (lh.fusiform_6)(lh.inferiorparietal_4)(lh.insula_2)(lh.lingual_6)                            |
| 0.00767 | 4.00E-05 | 0.73646 | 0.8392  | (lh.lingual_6)(lh.lingual_7)(lh.precuneus_11)(lh.supramarginal_1)                            |
| 0.00769 | 4.00E-05 | 0.76056 | 0.8593  | (lh.bankssts_3)(lh.fusiform_6)(lh.lingual_8)(lh.transversetemporal_2)                        |
| 0.0077  | 4.00E-05 | 0.75451 | 0.85427 | (Left-Amygdala)(lh.inferiorparietal_4)(lh.inferiorparietal_5)                                |
| 0.0077  | 4.00E-05 | 0.75451 | 0.85427 | (Brain_Stem)(Left-Amygdala)(lh.inferiorparietal_4)(lh.inferiorparietal_5)                    |
| 0.0077  | 4.00E-05 | 0.75451 | 0.85427 | (Left-Thalamus-Proper)(lh.inferiorparietal_4)(lh.lingual_6)(lh.superiortemporal_8)           |
| 0.0077  | 4.00E-05 | 0.75451 | 0.85427 | (lh.inferiorparietal_4)(lh.isthmuscingulate_3)(lh.lingual_6)(lh.superiortemporal_8)          |
| 0.0077  | 4.00E-05 | 0.75451 | 0.85427 | (Left-Amygdala)(lh.inferiorparietal_4)(lh.inferiorparietal_5)(lh.isthmuscingulate_3)         |
| 0.0077  | 4.00E-05 | 0.75451 | 0.85427 | (lh.inferiorparietal_4)(lh.insula_2)(lh.lingual_6)(lh.superiortemporal_8)                    |
| 0.0077  | 4.00E-05 | 0.75451 | 0.85427 | (Left-Putamen)(lh.inferiorparietal_4)(lh.lingual_6)(lh.superiortemporal_8)                   |
| 0.0077  | 4.00E-05 | 0.75451 | 0.85427 | (Left-Amygdala)(lh.inferiorparietal_4)(lh.inferiorparietal_5)(lh.insula_2)                   |
| 0.0077  | 5.00E-05 | 0.75451 | 0.85427 | (Left-Putamen)(lh.inferiorparietal_4)(lh.inferiorparietal_5)(lh.parahippocampal_1)           |
| 0.0077  | 5.00E-05 | 0.75451 | 0.85427 | (lh.inferiorparietal_4)(lh.inferiorparietal_5)(lh.insula_2)(lh.parahippocampal_1)            |
| 0.0077  | 5.00E-05 | 0.75451 | 0.85427 | (lh.inferiorparietal_4)(lh.lingual_6)(lh.superiortemporal_8)                                 |
| 0.0077  | 5.00E-05 | 0.75451 | 0.85427 | (Left-Caudate)(lh.inferiorparietal_5)(lh.precuneus_11)(lh.supramarginal_1)                   |
| 0.0077  | 5.00E-05 | 0.75451 | 0.85427 | (Left-Amygdala)(Left-Thalamus-Proper)(lh.inferiorparietal_4)(lh.inferiorparietal_5)          |
| 0.0077  | 5.00E-05 | 0.75451 | 0.85427 | (Left-Amygdala)(Left-Putamen)(lh.inferiorparietal_4)(lh.inferiorparietal_5)                  |
| 0.0077  | 5.00E-05 | 0.75451 | 0.85427 | (Left-Amygdala)(Left-Pallidum)(lh.inferiorparietal_4)(lh.precuneus_11)                       |
| 0.0077  | 5.00E-05 | 0.75451 | 0.85427 | (lh.inferiorparietal_4)(lh.inferiorparietal_5)(lh.insula_4)(lh.lingual_8)                    |
| 0.0077  | 5.00E-05 | 0.75451 | 0.85427 | (Brain_Stem)(lh.insula_2)(lh.precuneus_11)(lh.supramarginal_1)                               |
| 0.0077  | 5.00E-05 | 0.75451 | 0.85427 | (lh.lingual_8)(lh.precuneus_11)(lh.supramarginal_1)(lh.transversetemporal_2)                 |
| 0.0077  | 5.00E-05 | 0.75451 | 0.85427 | (Left-Thalamus-Proper)(lh.inferiorparietal_4)(lh.inferiorparietal_5)(lh.parahippocampal_1)   |
| 0.00774 | 5.00E-05 | 0.79783 | 0.88945 | (Left-Thalamus-Proper)(lh.fusiform_5)(lh.precuneus_11)(lh.supramarginal_1)                   |
| 0.00774 | 5.00E-05 | 0.79783 | 0.88945 | (lh.inferiorparietal_4)(lh.inferiorparietal_5)(lh.parahippocampal_3)(lh.superiortemporal_3)  |
| 0.00774 | 5.00E-05 | 0.79783 | 0.88945 | (lh.fusiform_5)(lh.isthmuscingulate_3)(lh.precuneus_11)(lh.supramarginal_1)                  |

|         |          |         |         |                                                                                               |
|---------|----------|---------|---------|-----------------------------------------------------------------------------------------------|
| 0.00774 | 5.00E-05 | 0.79783 | 0.88945 | (lh.fusiform_5)(lh.precuneus_11)(lh.supramarginal_1)                                          |
| 0.00774 | 5.00E-05 | 0.79783 | 0.88945 | (lh.fusiform_5)(lh.inferiorparietal_4)(lh.inferiorparietal_5)(lh.transversetemporal_2)        |
| 0.00774 | 5.00E-05 | 0.79783 | 0.88945 | (lh.fusiform_5)(lh.precuneus_11)(lh.superiortemporal_2)(lh.supramarginal_1)                   |
| 0.00774 | 5.00E-05 | 0.79783 | 0.88945 | (Left-Pallidum)(lh.inferiorparietal_4)(lh.isthmuscingulate_2)(lh.precuneus_11)                |
| 0.00787 | 5.00E-05 | 0.83032 | 0.91457 | (lh.fusiform_5)(lh.inferiorparietal_4)(lh.inferiorparietal_5)                                 |
| 0.00787 | 5.00E-05 | 0.83032 | 0.91457 | (lh.fusiform_7)(lh.inferiorparietal_5)(lh.precuneus_11)(lh.superiortemporal_8)                |
| 0.00787 | 5.00E-05 | 0.83032 | 0.91457 | (lh.fusiform_5)(lh.inferiorparietal_4)(lh.inferiorparietal_5)(lh.isthmuscingulate_3)          |
| 0.00787 | 5.00E-05 | 0.83032 | 0.91457 | (Left-Thalamus-Proper)(lh.fusiform_5)(lh.inferiorparietal_4)(lh.inferiorparietal_5)           |
| 0.00815 | 5.00E-05 | 0.77978 | 0.87437 | (Left-Putamen)(lh.insula_2)(lh.supramarginal_1)(lh.transversetemporal_2)                      |
| 0.00815 | 5.00E-05 | 0.77978 | 0.87437 | (lh.inferiorparietal_4)(lh.insula_2)(lh.precuneus_11)(lh.superiortemporal_6)                  |
| 0.00815 | 5.00E-05 | 0.77978 | 0.87437 | (lh.insula_2)(lh.isthmuscingulate_3)(lh.supramarginal_1)(lh.transversetemporal_2)             |
| 0.00815 | 5.00E-05 | 0.77978 | 0.87437 | (lh.insula_2)(lh.supramarginal_1)(lh.transversetemporal_2)                                    |
| 0.00815 | 5.00E-05 | 0.77978 | 0.87437 | (Left-Putamen)(lh.inferiorparietal_4)(lh.precuneus_11)(lh.superiortemporal_6)                 |
| 0.00815 | 5.00E-05 | 0.77978 | 0.87437 | (lh.inferiorparietal_5)(lh.lingual_8)(lh.precuneus_11)(lh.supramarginal_1)                    |
| 0.00815 | 5.00E-05 | 0.77978 | 0.87437 | (Left-Thalamus-Proper)(lh.insula_2)(lh.supramarginal_1)(lh.transversetemporal_2)              |
| 0.00815 | 5.00E-05 | 0.77978 | 0.87437 | (lh.inferiorparietal_5)(lh.isthmuscingulate_2)(lh.precuneus_11)(lh.supramarginal_1)           |
| 0.00815 | 5.00E-05 | 0.77978 | 0.87437 | (lh.insula_2)(lh.superiortemporal_2)(lh.supramarginal_1)(lh.transversetemporal_2)             |
| 0.00823 | 5.00E-05 | 0.76761 | 0.86432 | (lh.bankssts_3)(lh.fusiform_6)(lh.lingual_6)(lh.transversetemporal_2)                         |
| 0.00823 | 5.00E-05 | 0.72563 | 0.82915 | (lh.entorhinal_1)(lh.inferiorparietal_4)(lh.inferiorparietal_5)(lh.lingual_6)                 |
| 0.00823 | 5.00E-05 | 0.72563 | 0.82915 | (lh.inferiorparietal_5)(lh.precuneus_11)(lh.precuneus_6)(lh.transversetemporal_2)             |
| 0.00823 | 5.00E-05 | 0.72563 | 0.82915 | (lh.inferiorparietal_4)(lh.lingual_8)(lh.parahippocampal_1)(lh.superiortemporal_8)            |
| 0.00823 | 5.00E-05 | 0.72563 | 0.82915 | (lh.inferiorparietal_4)(lh.inferiorparietal_5)(lh.parahippocampal_1)(lh.parahippocampal_2)    |
| 0.00823 | 5.00E-05 | 0.72563 | 0.82915 | (Left-Putamen)(lh.lingual_7)(lh.supramarginal_1)(lh.transversetemporal_2)                     |
| 0.00823 | 5.00E-05 | 0.72563 | 0.82915 | (lh.parahippocampal_2)(lh.precuneus_11)(lh.superiortemporal_3)(lh.supramarginal_1)            |
| 0.00823 | 5.00E-05 | 0.72563 | 0.82915 | (Left-Pallidum)(lh.fusiform_6)(lh.inferiorparietal_4)(lh.inferiorparietal_5)                  |
| 0.00823 | 5.00E-05 | 0.72563 | 0.82915 | (lh.inferiorparietal_4)(lh.inferiorparietal_5)(lh.superiortemporal_6)(lh.superiortemporal_8)  |
| 0.00823 | 5.00E-05 | 0.72563 | 0.82915 | (lh.inferiorparietal_4)(lh.inferiorparietal_5)(lh.parahippocampal_1)(lh.transversetemporal_2) |
| 0.00823 | 6.00E-05 | 0.72563 | 0.82915 | (lh.inferiorparietal_4)(lh.inferiorparietal_5)(lh.insula_1)(lh.superiortemporal_8)            |
| 0.00825 | 6.00E-05 | 0.83755 | 0.9196  | (lh.fusiform_5)(lh.inferiorparietal_4)(lh.isthmuscingulate_3)(lh.precuneus_11)                |
| 0.00825 | 6.00E-05 | 0.83755 | 0.9196  | (lh.inferiorparietal_5)(lh.insula_4)(lh.parahippocampal_1)(lh.precuneus_11)                   |
| 0.00825 | 6.00E-05 | 0.83755 | 0.9196  | (Left-Thalamus-Proper)(lh.fusiform_5)(lh.inferiorparietal_4)(lh.precuneus_11)                 |
| 0.00825 | 6.00E-05 | 0.83755 | 0.9196  | (lh.fusiform_5)(lh.inferiorparietal_4)(lh.precuneus_11)                                       |
| 0.00825 | 6.00E-05 | 0.83755 | 0.9196  | (lh.inferiorparietal_5)(lh.lingual_6)(lh.lingual_7)(lh.precuneus_11)                          |
| 0.00825 | 6.00E-05 | 0.83755 | 0.9196  | (lh.fusiform_7)(lh.inferiorparietal_5)(lh.parahippocampal_1)(lh.precuneus_11)                 |
| 0.00826 | 6.00E-05 | 0.80505 | 0.89447 | (lh.inferiorparietal_4)(lh.inferiorparietal_5)(lh.isthmuscingulate_2)(lh.superiortemporal_3)  |
| 0.00826 | 6.00E-05 | 0.80505 | 0.89447 | (lh.inferiorparietal_4)(lh.parahippocampal_3)(lh.precuneus_11)(lh.superiortemporal_3)         |

|         |          |         |         |                                                                                             |
|---------|----------|---------|---------|---------------------------------------------------------------------------------------------|
| 0.00826 | 6.00E-05 | 0.80505 | 0.89447 | (lh.fusiform_5)(lh.inferiorparietal_4)(lh.precuneus_11)(lh.transversetemporal_2)            |
| 0.00836 | 6.00E-05 | 0.76173 | 0.8593  | (Left-Pallidum)(lh.inferiorparietal_4)(lh.inferiorparietal_5)(lh.insula_4)                  |
| 0.00836 | 6.00E-05 | 0.76173 | 0.8593  | (lh.inferiorparietal_4)(lh.insula_2)(lh.lingual_6)(lh.lingual_7)                            |
| 0.00836 | 6.00E-05 | 0.76173 | 0.8593  | (Left-Putamen)(lh.bankssts_3)(lh.supramarginal_1)(lh.transversetemporal_2)                  |
| 0.00836 | 6.00E-05 | 0.76173 | 0.8593  | (Left-Pallidum)(Left-Thalamus-Proper)(lh.supramarginal_1)(lh.transversetemporal_2)          |
| 0.00836 | 6.00E-05 | 0.76173 | 0.8593  | (Left-Pallidum)(Left-Putamen)(lh.supramarginal_1)(lh.transversetemporal_2)                  |
| 0.00836 | 6.00E-05 | 0.76173 | 0.8593  | (lh.fusiform_5)(lh.inferiorparietal_4)(lh.inferiorparietal_5)(lh.lingual_7)                 |
| 0.00836 | 6.00E-05 | 0.76173 | 0.8593  | (Brain_Stem)(Left-Putamen)(lh.precuneus_11)(lh.supramarginal_1)                             |
| 0.00837 | 6.00E-05 | 0.74368 | 0.84422 | (Left-Pallidum)(lh.inferiorparietal_4)(lh.lingual_6)(lh.lingual_7)                          |
| 0.00837 | 6.00E-05 | 0.74368 | 0.84422 | (lh.fusiform_6)(lh.inferiorparietal_4)(lh.inferiorparietal_5)(lh.superiortemporal_2)        |
| 0.00837 | 6.00E-05 | 0.74368 | 0.84422 | (lh.inferiorparietal_4)(lh.lingual_6)(lh.lingual_8)(lh.superiortemporal_8)                  |
| 0.00837 | 6.00E-05 | 0.74368 | 0.84422 | (lh.fusiform_6)(lh.inferiorparietal_4)(lh.insula_2)(lh.lingual_8)                           |
| 0.00837 | 6.00E-05 | 0.74368 | 0.84422 | (Left-Thalamus-Proper)(lh.fusiform_6)(lh.inferiorparietal_4)(lh.lingual_6)                  |
| 0.00837 | 6.00E-05 | 0.74368 | 0.84422 | (Left-Putamen)(lh.fusiform_6)(lh.inferiorparietal_4)(lh.lingual_6)                          |
| 0.00837 | 6.00E-05 | 0.74368 | 0.84422 | (lh.fusiform_5)(lh.fusiform_6)(lh.inferiorparietal_4)(lh.inferiorparietal_5)                |
| 0.00837 | 6.00E-05 | 0.74368 | 0.84422 | (lh.fusiform_6)(lh.inferiorparietal_4)(lh.isthmuscingulate_3)(lh.lingual_6)                 |
| 0.00837 | 6.00E-05 | 0.74368 | 0.84422 | (lh.fusiform_6)(lh.inferiorparietal_4)(lh.lingual_6)                                        |
| 0.00837 | 6.00E-05 | 0.74368 | 0.84422 | (lh.inferiorparietal_4)(lh.isthmuscingulate_2)(lh.precuneus_11)(lh.superiortemporal_8)      |
| 0.00873 | 6.00E-05 | 0.73239 | 0.83417 | (lh.inferiorparietal_4)(lh.isthmuscingulate_2)(lh.isthmuscingulate_3)(lh.supramarginal_1)   |
| 0.00873 | 7.00E-05 | 0.73239 | 0.83417 | (lh.inferiorparietal_4)(lh.isthmuscingulate_2)(lh.supramarginal_1)                          |
| 0.00874 | 7.00E-05 | 0.7148  | 0.8191  | (lh.fusiform_6)(lh.inferiorparietal_4)(lh.lingual_6)(lh.transversetemporal_2)               |
| 0.00876 | 7.00E-05 | 0.90975 | 0.96985 | (lh.bankssts_3)(lh.inferiorparietal_5)(lh.precuneus_11)                                     |
| 0.00876 | 7.00E-05 | 0.90975 | 0.96985 | (Left-Thalamus-Proper)(lh.bankssts_3)(lh.inferiorparietal_5)(lh.precuneus_11)               |
| 0.00876 | 7.00E-05 | 0.90975 | 0.96985 | (Left-Putamen)(lh.inferiorparietal_5)(lh.lingual_8)(lh.precuneus_11)                        |
| 0.00876 | 7.00E-05 | 0.90975 | 0.96985 | (lh.bankssts_3)(lh.inferiorparietal_5)(lh.isthmuscingulate_3)(lh.precuneus_11)              |
| 0.00878 | 7.00E-05 | 0.787   | 0.8794  | (lh.fusiform_5)(lh.lingual_6)(lh.precuneus_11)(lh.supramarginal_1)                          |
| 0.00878 | 7.00E-05 | 0.787   | 0.8794  | (lh.fusiform_7)(lh.inferiorparietal_4)(lh.inferiorparietal_5)(lh.insula_2)                  |
| 0.00878 | 7.00E-05 | 0.787   | 0.8794  | (Left-Pallidum)(lh.inferiorparietal_5)(lh.insula_2)(lh.supramarginal_1)                     |
| 0.00878 | 7.00E-05 | 0.787   | 0.8794  | (lh.fusiform_5)(lh.inferiorparietal_5)(lh.superiortemporal_3)(lh.supramarginal_1)           |
| 0.00878 | 7.00E-05 | 0.787   | 0.8794  | (Left-Thalamus-Proper)(lh.isthmuscingulate_3)(lh.supramarginal_1)(lh.transversetemporal_2)  |
| 0.00878 | 7.00E-05 | 0.787   | 0.8794  | (lh.isthmuscingulate_3)(lh.superiortemporal_2)(lh.supramarginal_1)(lh.transversetemporal_2) |
| 0.00878 | 7.00E-05 | 0.787   | 0.8794  | (lh.supramarginal_1)(lh.transversetemporal_2)                                               |
| 0.00878 | 7.00E-05 | 0.787   | 0.8794  | (Brain_Stem)(Left-Thalamus-Proper)(lh.inferiorparietal_4)(lh.precuneus_11)                  |
| 0.00878 | 7.00E-05 | 0.787   | 0.8794  | (lh.isthmuscingulate_3)(lh.supramarginal_1)(lh.transversetemporal_2)                        |
| 0.00878 | 7.00E-05 | 0.787   | 0.8794  | (Left-Thalamus-Proper)(lh.supramarginal_1)(lh.transversetemporal_2)                         |
| 0.00878 | 7.00E-05 | 0.787   | 0.8794  | (Left-Thalamus-Proper)(lh.superiortemporal_2)(lh.supramarginal_1)(lh.transversetemporal_2)  |

|         |          |         |         |                                                                                           |
|---------|----------|---------|---------|-------------------------------------------------------------------------------------------|
| 0.00878 | 7.00E-05 | 0.787   | 0.8794  | (lh.superiortemporal_2)(lh.supramarginal_1)(lh.transversetemporal_2)                      |
| 0.00878 | 7.00E-05 | 0.77465 | 0.86935 | (lh.bankssts_3)(lh.inferioparietal_5)(lh.lateraloccipital_9)(lh.transversetemporal_2)     |
| 0.00878 | 7.00E-05 | 0.77465 | 0.86935 | (lh.inferioparietal_4)(lh.lingual_6)(lh.parahippocampal_3)(lh.transversetemporal_2)       |
| 0.00878 | 8.00E-05 | 0.77465 | 0.86935 | (lh.bankssts_3)(lh.fusiform_6)(lh.inferioparietal_5)(lh.transversetemporal_2)             |
| 0.0088  | 8.00E-05 | 0.81227 | 0.8995  | (lh.fusiform_6)(lh.inferioparietal_5)(lh.lingual_6)(lh.precuneus_11)                      |
| 0.0088  | 8.00E-05 | 0.81227 | 0.8995  | (Left-Pallidum)(lh.inferioparietal_4)(lh.insula_2)(lh.lingual_8)                          |
| 0.0088  | 8.00E-05 | 0.81227 | 0.8995  | (lh.inferioparietal_4)(lh.isthmuscingulate_2)(lh.precuneus_11)(lh.superiortemporal_3)     |
| 0.0088  | 8.00E-05 | 0.81227 | 0.8995  | (lh.fusiform_5)(lh.inferioparietal_4)(lh.inferioparietal_5)(lh.superiortemporal_3)        |
| 0.0088  | 8.00E-05 | 0.81227 | 0.8995  | (lh.bankssts_3)(lh.inferioparietal_4)(lh.inferioparietal_5)(lh.superiortemporal_2)        |
| 0.00892 | 8.00E-05 | 0.93502 | 0.98492 | (Left-Putamen)(lh.inferioparietal_5)(lh.lingual_6)                                        |
| 0.00892 | 8.00E-05 | 0.93502 | 0.98492 | (Left-Putamen)(Left-Thalamus-Proper)(lh.inferioparietal_5)(lh.lingual_6)                  |
| 0.00892 | 8.00E-05 | 0.93502 | 0.98492 | (Left-Putamen)(lh.inferioparietal_5)(lh.isthmuscingulate_3)(lh.lingual_6)                 |
| 0.00892 | 8.00E-05 | 0.93502 | 0.98492 | (lh.inferioparietal_5)(lh.isthmuscingulate_3)(lh.precuneus_11)(lh.superiortemporal_2)     |
| 0.00892 | 8.00E-05 | 0.93502 | 0.98492 | (Left-Thalamus-Proper)(lh.inferioparietal_5)(lh.precuneus_11)(lh.superiortemporal_2)      |
| 0.00892 | 8.00E-05 | 0.93502 | 0.98492 | (lh.inferioparietal_5)(lh.precuneus_11)(lh.superiortemporal_2)                            |
| 0.009   | 8.00E-05 | 0.73285 | 0.83417 | (Left-Pallidum)(lh.inferioparietal_4)(lh.parahippocampal_1)(lh.superiortemporal_8)        |
| 0.009   | 8.00E-05 | 0.73285 | 0.83417 | (lh.entorhinal_1)(lh.inferioparietal_4)(lh.lingual_6)(lh.precuneus_11)                    |
| 0.009   | 8.00E-05 | 0.73285 | 0.83417 | (lh.fusiform_6)(lh.inferioparietal_4)(lh.inferioparietal_5)(lh.superiortemporal_3)        |
| 0.009   | 8.00E-05 | 0.73285 | 0.83417 | (Left-Putamen)(lh.precuneus_11)(lh.precuneus_6)(lh.transversetemporal_2)                  |
| 0.009   | 9.00E-05 | 0.73285 | 0.83417 | (Left-Putamen)(lh.inferioparietal_5)(lh.precuneus_6)(lh.transversetemporal_2)             |
| 0.009   | 9.00E-05 | 0.73285 | 0.83417 | (Left-Amygdala)(Left-Pallidum)(lh.precuneus_11)(lh.supramarginal_1)                       |
| 0.009   | 9.00E-05 | 0.73285 | 0.83417 | (lh.inferioparietal_4)(lh.precuneus_11)(lh.superiortemporal_6)(lh.superiortemporal_8)     |
| 0.009   | 9.00E-05 | 0.73285 | 0.83417 | (Left-Pallidum)(lh.fusiform_6)(lh.inferioparietal_4)(lh.precuneus_11)                     |
| 0.009   | 9.00E-05 | 0.73285 | 0.83417 | (lh.bankssts_3)(lh.inferioparietal_4)(lh.inferioparietal_5)(lh.parahippocampal_1)         |
| 0.00906 | 9.00E-05 | 0.76895 | 0.86432 | (Brain_Stem)(lh.inferioparietal_4)(lh.precuneus_11)(lh.superiortemporal_3)                |
| 0.00906 | 9.00E-05 | 0.76895 | 0.86432 | (Left-Putamen)(lh.inferioparietal_4)(lh.lingual_6)(lh.lingual_7)                          |
| 0.00906 | 9.00E-05 | 0.76895 | 0.86432 | (Left-Thalamus-Proper)(lh.inferioparietal_4)(lh.inferioparietal_5)(lh.insula_4)           |
| 0.00906 | 9.00E-05 | 0.76895 | 0.86432 | (Left-Putamen)(lh.inferioparietal_4)(lh.inferioparietal_5)(lh.insula_4)                   |
| 0.00906 | 9.00E-05 | 0.76895 | 0.86432 | (lh.fusiform_5)(lh.inferioparietal_4)(lh.lingual_7)(lh.precuneus_11)                      |
| 0.00906 | 9.00E-05 | 0.76895 | 0.86432 | (lh.inferioparietal_4)(lh.inferioparietal_5)(lh.insula_2)(lh.insula_4)                    |
| 0.00906 | 9.00E-05 | 0.76895 | 0.86432 | (lh.fusiform_5)(lh.inferioparietal_5)(lh.supramarginal_1)(lh.transversetemporal_2)        |
| 0.00906 | 0.0001   | 0.76895 | 0.86432 | (lh.insula_2)(lh.lingual_6)(lh.supramarginal_1)(lh.transversetemporal_2)                  |
| 0.00912 | 0.0001   | 0.7509  | 0.84925 | (lh.insula_2)(lh.precuneus_11)(lh.superiortemporal_6)(lh.supramarginal_1)                 |
| 0.00912 | 0.0001   | 0.7509  | 0.84925 | (Left-Thalamus-Proper)(lh.fusiform_6)(lh.inferioparietal_4)(lh.lingual_8)                 |
| 0.00912 | 0.0001   | 0.7509  | 0.84925 | (lh.inferioparietal_5)(lh.parahippocampal_3)(lh.supramarginal_1)(lh.transversetemporal_2) |
| 0.00912 | 0.0001   | 0.7509  | 0.84925 | (lh.inferioparietal_4)(lh.insula_4)(lh.lingual_8)(lh.parahippocampal_1)                   |



|         |         |         |         |                                                                                           |
|---------|---------|---------|---------|-------------------------------------------------------------------------------------------|
| 0.00912 | 0.0001  | 0.7509  | 0.84925 | (Left-Pallidum)(lh.superiortemporal_3)(lh.supramarginal_1)(lh.transversetemporal_2)       |
| 0.00912 | 0.0001  | 0.7509  | 0.84925 | (lh.fusiform_6)(lh.inferiorparietal_4)(lh.precuneus_11)(lh.superiortemporal_2)            |
| 0.00912 | 0.0001  | 0.7509  | 0.84925 | (lh.fusiform_6)(lh.inferiorparietal_4)(lh.isthmuscingulate_3)(lh.lingual_8)               |
| 0.00912 | 0.0001  | 0.7509  | 0.84925 | (Brain_Stem)(lh.inferiorparietal_4)(lh.inferiorparietal_5)(lh.parahippocampal_3)          |
| 0.00912 | 0.0001  | 0.7509  | 0.84925 | (lh.precuneus_11)(lh.superiortemporal_2)(lh.superiortemporal_6)(lh.supramarginal_1)       |
| 0.00912 | 0.00011 | 0.7509  | 0.84925 | (Left-Amygdala)(lh.inferiorparietal_4)(lh.lingual_8)(lh.precuneus_11)                     |
| 0.00912 | 0.00011 | 0.7509  | 0.84925 | (Left-Pallidum)(lh.lingual_6)(lh.supramarginal_1)(lh.transversetemporal_2)                |
| 0.00912 | 0.00011 | 0.7509  | 0.84925 | (lh.fusiform_7)(lh.inferiorparietal_4)(lh.lingual_8)(lh.parahippocampal_1)                |
| 0.00912 | 0.00011 | 0.7509  | 0.84925 | (lh.inferiorparietal_4)(lh.inferiorparietal_5)(lh.lingual_6)(lh.parahippocampal_2)        |
| 0.00912 | 0.00011 | 0.7509  | 0.84925 | (Left-Putamen)(lh.fusiform_6)(lh.inferiorparietal_4)(lh.lingual_8)                        |
| 0.00912 | 0.00011 | 0.7509  | 0.84925 | (lh.fusiform_5)(lh.fusiform_6)(lh.inferiorparietal_4)(lh.precuneus_11)                    |
| 0.00912 | 0.00011 | 0.7509  | 0.84925 | (lh.precuneus_11)(lh.superiortemporal_6)(lh.supramarginal_1)                              |
| 0.00912 | 0.00011 | 0.7509  | 0.84925 | (Left-Thalamus-Proper)(lh.precuneus_11)(lh.superiortemporal_6)(lh.supramarginal_1)        |
| 0.00912 | 0.00011 | 0.7509  | 0.84925 | (lh.fusiform_6)(lh.inferiorparietal_4)(lh.lingual_8)                                      |
| 0.00912 | 0.00012 | 0.7509  | 0.84925 | (lh.isthmuscingulate_3)(lh.precuneus_11)(lh.superiortemporal_6)(lh.supramarginal_1)       |
| 0.00912 | 0.00012 | 0.7509  | 0.84925 | (Left-Putamen)(lh.precuneus_11)(lh.superiortemporal_6)(lh.supramarginal_1)                |
| 0.00921 | 0.00012 | 0.70397 | 0.80905 | (lh.fusiform_6)(lh.lingual_8)(lh.precuneus_11)(lh.supramarginal_1)                        |
| 0.00921 | 0.00012 | 0.70397 | 0.80905 | (Left-Pallidum)(lh.lingual_7)(lh.supramarginal_1)(lh.transversetemporal_2)                |
| 0.00921 | 0.00012 | 0.70397 | 0.80905 | (lh.lateraloccipital_9)(lh.precuneus_11)(lh.superiortemporal_3)(lh.supramarginal_1)       |
| 0.00921 | 0.00012 | 0.70397 | 0.80905 | (lh.inferiorparietal_5)(lh.lateraloccipital_9)(lh.superiortemporal_3)(lh.supramarginal_1) |
| 0.00924 | 0.00013 | 0.90253 | 0.96482 | (Left-Thalamus-Proper)(lh.insula_2)(lh.precuneus_11)(lh.transversetemporal_2)             |
| 0.00924 | 0.00013 | 0.90253 | 0.96482 | (lh.insula_2)(lh.precuneus_11)(lh.transversetemporal_2)                                   |
| 0.00924 | 0.00013 | 0.90253 | 0.96482 | (Left-Thalamus-Proper)(lh.inferiorparietal_5)(lh.insula_2)(lh.transversetemporal_2)       |
| 0.00924 | 0.00013 | 0.90253 | 0.96482 | (Left-Pallidum)(lh.insula_2)(lh.lingual_6)(lh.precuneus_11)                               |
| 0.00924 | 0.00013 | 0.90253 | 0.96482 | (lh.inferiorparietal_5)(lh.insula_2)(lh.isthmuscingulate_3)(lh.transversetemporal_2)      |
| 0.00924 | 0.00013 | 0.90253 | 0.96482 | (lh.inferiorparietal_5)(lh.insula_2)(lh.transversetemporal_2)                             |
| 0.00924 | 0.00014 | 0.90253 | 0.96482 | (lh.inferiorparietal_5)(lh.insula_2)(lh.lingual_8)(lh.precuneus_11)                       |
| 0.00924 | 0.00014 | 0.90253 | 0.96482 | (Left-Pallidum)(lh.inferiorparietal_5)(lh.precuneus_11)(lh.superiortemporal_2)            |
| 0.00924 | 0.00014 | 0.90253 | 0.96482 | (Left-Putamen)(lh.inferiorparietal_5)(lh.insula_2)(lh.transversetemporal_2)               |
| 0.00924 | 0.00014 | 0.90253 | 0.96482 | (Left-Putamen)(lh.insula_2)(lh.precuneus_11)(lh.transversetemporal_2)                     |
| 0.00924 | 0.00014 | 0.90253 | 0.96482 | (lh.insula_2)(lh.isthmuscingulate_3)(lh.precuneus_11)(lh.transversetemporal_2)            |
| 0.00935 | 0.00014 | 0.81949 | 0.90452 | (lh.fusiform_5)(lh.inferiorparietal_4)(lh.precuneus_11)(lh.superiortemporal_3)            |
| 0.00935 | 0.00015 | 0.81949 | 0.90452 | (lh.bankssts_3)(lh.inferiorparietal_4)(lh.precuneus_11)(lh.superiortemporal_2)            |
| 0.00935 | 0.00015 | 0.81949 | 0.90452 | (lh.fusiform_7)(lh.parahippocampal_1)(lh.precuneus_11)(lh.superiortemporal_8)             |
| 0.00935 | 0.00015 | 0.81949 | 0.90452 | (Left-Putamen)(lh.inferiorparietal_4)(lh.lingual_6)(lh.superiortemporal_3)                |
| 0.00936 | 0.00015 | 0.78169 | 0.87437 | (lh.bankssts_3)(lh.fusiform_5)(lh.inferiorparietal_4)(lh.parahippocampal_3)               |

|         |         |         |         |                                                                                              |
|---------|---------|---------|---------|----------------------------------------------------------------------------------------------|
| 0.00936 | 0.00016 | 0.78169 | 0.87437 | (lh.bankssts_3)(lh.fusiform_6)(lh.isthmuscingulate_3)(lh.transversetemporal_2)               |
| 0.00936 | 0.00016 | 0.78169 | 0.87437 | (Left-Pallidum)(lh.inferiorparietal_4)(lh.lingual_6)(lh.parahippocampal_3)                   |
| 0.00936 | 0.00016 | 0.78169 | 0.87437 | (lh.bankssts_3)(lh.fusiform_6)(lh.transversetemporal_2)                                      |
| 0.00936 | 0.00016 | 0.78169 | 0.87437 | (lh.inferiorparietal_5)(lh.lateraloccipital_9)(lh.lingual_6)(lh.transversetemporal_2)        |
| 0.00936 | 0.00017 | 0.78169 | 0.87437 | (lh.bankssts_3)(lh.fusiform_5)(lh.inferiorparietal_4)(lh.transversetemporal_2)               |
| 0.00936 | 0.00017 | 0.78169 | 0.87437 | (Left-Pallidum)(lh.inferiorparietal_4)(lh.lingual_8)(lh.transversetemporal_2)                |
| 0.00944 | 0.00017 | 0.79422 | 0.88442 | (lh.inferiorparietal_4)(lh.insula_1)(lh.lingual_6)(lh.precuneus_11)                          |
| 0.00944 | 0.00018 | 0.79422 | 0.88442 | (lh.inferiorparietal_5)(lh.insula_2)(lh.lingual_6)(lh.supramarginal_1)                       |
| 0.00944 | 0.00018 | 0.79422 | 0.88442 | (lh.fusiform_7)(lh.inferiorparietal_4)(lh.insula_2)(lh.precuneus_11)                         |
| 0.00954 | 0.00018 | 0.89531 | 0.9598  | (Left-Pallidum)(lh.fusiform_5)(lh.inferiorparietal_5)(lh.precuneus_11)                       |
| 0.00959 | 0.00019 | 0.72202 | 0.82412 | (lh.inferiorparietal_4)(lh.parahippocampal_2)(lh.precuneus_11)(lh.superiortemporal_8)        |
| 0.00959 | 0.00019 | 0.72202 | 0.82412 | (lh.fusiform_6)(lh.inferiorparietal_4)(lh.lingual_8)(lh.transversetemporal_2)                |
| 0.00959 | 0.00019 | 0.72202 | 0.82412 | (lh.fusiform_7)(lh.inferiorparietal_4)(lh.inferiorparietal_5)(lh.lingual_7)                  |
| 0.00959 | 0.0002  | 0.72202 | 0.82412 | (lh.insula_2)(lh.lingual_7)(lh.supramarginal_1)(lh.transversetemporal_2)                     |
| 0.00963 | 0.0002  | 0.87365 | 0.94472 | (lh.inferiorparietal_5)(lh.lingual_6)(lh.superiortemporal_3)(lh.transversetemporal_2)        |
| 0.00963 | 0.0002  | 0.87365 | 0.94472 | (lh.lingual_6)(lh.precuneus_11)(lh.superiortemporal_3)(lh.transversetemporal_2)              |
| 0.00969 | 0.00021 | 0.88809 | 0.95477 | (lh.inferiorparietal_5)(lh.lingual_6)(lh.parahippocampal_3)(lh.precuneus_11)                 |
| 0.00969 | 0.00021 | 0.88809 | 0.95477 | (lh.bankssts_3)(lh.inferiorparietal_5)(lh.precuneus_11)(lh.superiortemporal_3)               |
| 0.00971 | 0.00022 | 0.88087 | 0.94975 | (Left-Putamen)(lh.bankssts_3)(lh.precuneus_11)(lh.transversetemporal_2)                      |
| 0.00971 | 0.00022 | 0.88087 | 0.94975 | (Left-Putamen)(lh.bankssts_3)(lh.inferiorparietal_5)(lh.transversetemporal_2)                |
| 0.00971 | 0.00023 | 0.88087 | 0.94975 | (Left-Pallidum)(lh.insula_2)(lh.precuneus_11)(lh.transversetemporal_2)                       |
| 0.00971 | 0.00023 | 0.88087 | 0.94975 | (Left-Pallidum)(lh.inferiorparietal_5)(lh.insula_2)(lh.transversetemporal_2)                 |
| 0.0098  | 0.00024 | 0.77617 | 0.86935 | (Left-Putamen)(lh.inferiorparietal_4)(lh.insula_4)(lh.precuneus_11)                          |
| 0.0098  | 0.00024 | 0.77617 | 0.86935 | (Brain_Stem)(lh.inferiorparietal_4)(lh.inferiorparietal_5)(lh.superiortemporal_2)            |
| 0.0098  | 0.00025 | 0.77617 | 0.86935 | (lh.insula_2)(lh.parahippocampal_3)(lh.precuneus_11)(lh.supramarginal_1)                     |
| 0.0098  | 0.00026 | 0.77617 | 0.86935 | (Left-Thalamus-Proper)(lh.inferiorparietal_4)(lh.insula_4)(lh.precuneus_11)                  |
| 0.0098  | 0.00026 | 0.77617 | 0.86935 | (Left-Thalamus-Proper)(lh.inferiorparietal_4)(lh.inferiorparietal_5)(lh.superiortemporal_6)  |
| 0.0098  | 0.00027 | 0.77617 | 0.86935 | (lh.inferiorparietal_4)(lh.insula_4)(lh.precuneus_11)                                        |
| 0.0098  | 0.00028 | 0.77617 | 0.86935 | (lh.inferiorparietal_4)(lh.inferiorparietal_5)(lh.superiortemporal_6)                        |
| 0.0098  | 0.00029 | 0.77617 | 0.86935 | (lh.inferiorparietal_4)(lh.inferiorparietal_5)(lh.isthmuscingulate_3)(lh.superiortemporal_6) |
| 0.0098  | 0.00029 | 0.77617 | 0.86935 | (lh.inferiorparietal_4)(lh.insula_4)(lh.isthmuscingulate_3)(lh.precuneus_11)                 |
| 0.0098  | 0.0003  | 0.77617 | 0.86935 | (Left-Thalamus-Proper)(lh.lingual_6)(lh.supramarginal_1)(lh.transversetemporal_2)            |
| 0.0098  | 0.00031 | 0.77617 | 0.86935 | (lh.inferiorparietal_4)(lh.insula_2)(lh.insula_4)(lh.precuneus_11)                           |
| 0.0098  | 0.00032 | 0.77617 | 0.86935 | (Left-Caudate)(lh.inferiorparietal_4)(lh.insula_2)(lh.precuneus_11)                          |
| 0.0098  | 0.00033 | 0.77617 | 0.86935 | (lh.lingual_6)(lh.superiortemporal_2)(lh.supramarginal_1)(lh.transversetemporal_2)           |
| 0.00984 | 0.00034 | 0.74007 | 0.8392  | (lh.inferiorparietal_4)(lh.inferiorparietal_5)(lh.insula_4)(lh.transversetemporal_2)         |

|         |         |         |         |                                                                                           |
|---------|---------|---------|---------|-------------------------------------------------------------------------------------------|
| 0.00984 | 0.00036 | 0.74007 | 0.8392  | (lh.fusiform_6)(lh.inferiorparietal_4)(lh.precuneus_11)(lh.superiortemporal_3)            |
| 0.00984 | 0.00037 | 0.74007 | 0.8392  | (Left-Pallidum)(lh.bankssts_3)(lh.supramarginal_1)(lh.transversetemporal_2)               |
| 0.00984 | 0.00038 | 0.74007 | 0.8392  | (lh.fusiform_5)(lh.lingual_7)(lh.precuneus_11)(lh.supramarginal_1)                        |
| 0.00984 | 0.0004  | 0.74007 | 0.8392  | (lh.inferiorparietal_4)(lh.parahippocampal_1)(lh.superiortemporal_8)                      |
| 0.00984 | 0.00042 | 0.74007 | 0.8392  | (Left-Thalamus-Proper)(lh.inferiorparietal_4)(lh.parahippocampal_1)(lh.superiortemporal_  |
| 0.00984 | 0.00043 | 0.74007 | 0.8392  | (lh.entorhinal_1)(lh.inferiorparietal_4)(lh.parahippocampal_1)(lh.precuneus_11)           |
| 0.00984 | 0.00045 | 0.74007 | 0.8392  | (lh.inferiorparietal_4)(lh.parahippocampal_1)(lh.parahippocampal_3)(lh.precuneus_11)      |
| 0.00984 | 0.00048 | 0.74007 | 0.8392  | (lh.bankssts_3)(lh.inferiorparietal_4)(lh.lingual_8)(lh.superiortemporal_8)               |
| 0.00984 | 0.0005  | 0.74007 | 0.8392  | (lh.inferiorparietal_4)(lh.isthmuscingulate_3)(lh.parahippocampal_1)(lh.superiortemporal_ |
| 0.00984 | 0.00053 | 0.74007 | 0.8392  | (lh.inferiorparietal_4)(lh.insula_2)(lh.parahippocampal_1)(lh.superiortemporal_8)         |
| 0.00984 | 0.00056 | 0.74007 | 0.8392  | (Left-Putamen)(lh.inferiorparietal_4)(lh.parahippocampal_1)(lh.superiortemporal_8)        |
| 0.0099  | 0.00059 | 0.82671 | 0.90955 | (Left-Pallidum)(Left-Thalamus-Proper)(lh.inferiorparietal_4)(lh.insula_2)                 |
| 0.0099  | 0.00063 | 0.82671 | 0.90955 | (Left-Pallidum)(lh.inferiorparietal_4)(lh.insula_2)                                       |
| 0.0099  | 0.00067 | 0.82671 | 0.90955 | (lh.inferiorparietal_4)(lh.insula_2)(lh.lingual_6)(lh.superiortemporal_2)                 |
| 0.0099  | 0.00071 | 0.82671 | 0.90955 | (Left-Pallidum)(lh.inferiorparietal_4)(lh.insula_2)(lh.isthmuscingulate_3)                |
| 0.0099  | 0.00077 | 0.82671 | 0.90955 | (Left-Pallidum)(Left-Putamen)(lh.inferiorparietal_4)(lh.insula_2)                         |
| 0.00992 | 0.00083 | 0.75812 | 0.85427 | (Brain_Stem)(lh.inferiorparietal_4)(lh.precuneus_11)(lh.transversetemporal_2)             |
| 0.00992 | 0.00091 | 0.75812 | 0.85427 | (Left-Pallidum)(lh.inferiorparietal_4)(lh.insula_2)(lh.lingual_7)                         |
| 0.00992 | 0.001   | 0.75812 | 0.85427 | (lh.bankssts_3)(lh.inferiorparietal_4)(lh.lingual_7)(lh.precuneus_11)                     |
| 0.00992 | 0.00111 | 0.75812 | 0.85427 | (lh.inferiorparietal_4)(lh.parahippocampal_1)(lh.precuneus_11)(lh.superiortemporal_2)     |
| 0.00992 | 0.00125 | 0.75812 | 0.85427 | (Brain_Stem)(lh.bankssts_3)(lh.inferiorparietal_4)(lh.inferiorparietal_5)                 |
| 0.00992 | 0.00143 | 0.75812 | 0.85427 | (Brain_Stem)(Left-Pallidum)(lh.inferiorparietal_4)(lh.lingual_6)                          |
| 0.00992 | 0.00167 | 0.75812 | 0.85427 | (lh.bankssts_3)(lh.insula_2)(lh.supramarginal_1)(lh.transversetemporal_2)                 |
| 0.00992 | 0.002   | 0.75812 | 0.85427 | (lh.insula_1)(lh.precuneus_11)(lh.supramarginal_1)(lh.transversetemporal_2)               |
| 0.00992 | 0.0025  | 0.75812 | 0.85427 | (Left-Pallidum)(lh.fusiform_7)(lh.inferiorparietal_4)(lh.parahippocampal_1)               |
| 0.00992 | 0.00333 | 0.75812 | 0.85427 | (Left-Caudate)(lh.insula_2)(lh.precuneus_11)(lh.supramarginal_1)                          |
| 0.00996 | 0.005   | 0.78873 | 0.8794  | (lh.fusiform_6)(lh.lingual_6)(lh.precuneus_11)(lh.transversetemporal_2)                   |
| 0.00996 | 0.01    | 0.78873 | 0.8794  | (lh.inferiorparietal_5)(lh.insula_2)(lh.lateraloccipital_9)(lh.transversetemporal_2)      |





- 1)
- 2)
- 3)













2)



2)

2)

1

2)

1

1)

1)

2)

3)





2)

|\_2)

|



2)









1  
\_2)

\_2)  
|\_2)

|\_2)

2)





8)

8)
