# Supplementary material for: Good neighbors, bad neighbors: the frequent network neighborhood mapping of the hippocampus enlightens several structural factors of the human intelligence on a 414-subject cohort
Source: PubMed Central journal article supplement (PMC7371878; doi:10.1038/s41598-020-68914-2), 2020-07-20
Supplement: 41598_2020_68914_MOESM9_ESM.pdf [file 41598_2020_68914_MOESM9_ESM.pdf]

| p-value | Holm-Bonferroni | frequency_upper | frequency_lower | name                                                                                |
|---------|-----------------|-----------------|-----------------|-------------------------------------------------------------------------------------|
| 0.00503 | 3.00E-05        | 0.80505         | 0.69347         | (Right-Accumbens-area)(Right-Pallidum)(rh.bankssts_3)                               |
| 0.00503 | 3.00E-05        | 0.80505         | 0.69347         | (Right-Accumbens-area)(Right-Thalamus-Proper)(rh.bankssts_3)(rh.isthmuscingulate_2) |
| 0.00503 | 3.00E-05        | 0.80505         | 0.69347         | (Right-Accumbens-area)(Right-Pallidum)(Right-Putamen)(rh.bankssts_3)                |
| 0.00503 | 3.00E-05        | 0.80505         | 0.69347         | (Right-Accumbens-area)(Right-Putamen)(rh.bankssts_3)(rh.insula_2)                   |
| 0.00503 | 3.00E-05        | 0.80505         | 0.69347         | (Right-Accumbens-area)(Right-Thalamus-Proper)(rh.bankssts_3)(rh.lingual_7)          |
| 0.00503 | 3.00E-05        | 0.80505         | 0.69347         | (Right-Accumbens-area)(rh.bankssts_3)(rh.insula_2)(rh.lingual_7)                    |
| 0.00503 | 3.00E-05        | 0.80505         | 0.69347         | (Right-Accumbens-area)(rh.bankssts_3)(rh.isthmuscingulate_2)                        |
| 0.00503 | 3.00E-05        | 0.80505         | 0.69347         | (Right-Accumbens-area)(Right-Putamen)(Right-Thalamus-Proper)(rh.bankssts_3)         |
| 0.00503 | 3.00E-05        | 0.80505         | 0.69347         | (Right-Accumbens-area)(Right-Pallidum)(rh.bankssts_3)(rh.insula_2)                  |
| 0.00503 | 3.00E-05        | 0.80505         | 0.69347         | (Right-Accumbens-area)(Right-Putamen)(rh.bankssts_3)                                |
| 0.00503 | 3.00E-05        | 0.80505         | 0.69347         | (Right-Accumbens-area)(Right-Thalamus-Proper)(rh.bankssts_3)                        |
| 0.00503 | 3.00E-05        | 0.80505         | 0.69347         | (Right-Accumbens-area)(Right-Pallidum)(Right-Thalamus-Proper)(rh.bankssts_3)        |
| 0.00503 | 3.00E-05        | 0.80505         | 0.69347         | (Right-Accumbens-area)(Right-Putamen)(rh.bankssts_3)(rh.lingual_7)                  |
| 0.00503 | 3.00E-05        | 0.80505         | 0.69347         | (Right-Accumbens-area)(Right-Putamen)(rh.bankssts_3)(rh.isthmuscingulate_2)         |
| 0.00503 | 3.00E-05        | 0.80505         | 0.69347         | (Right-Accumbens-area)(rh.bankssts_3)(rh.isthmuscingulate_2)(rh.lingual_7)          |
| 0.00503 | 3.00E-05        | 0.80505         | 0.69347         | (Right-Accumbens-area)(rh.bankssts_2)(rh.bankssts_3)(rh.insula_2)                   |
| 0.00503 | 4.00E-05        | 0.80505         | 0.69347         | (Right-Accumbens-area)(Right-Pallidum)(rh.bankssts_3)(rh.lingual_7)                 |
| 0.00503 | 4.00E-05        | 0.80505         | 0.69347         | (Right-Accumbens-area)(Right-Thalamus-Proper)(rh.bankssts_3)(rh.insula_2)           |
| 0.00503 | 4.00E-05        | 0.80505         | 0.69347         | (Right-Accumbens-area)(Right-Putamen)(rh.bankssts_2)(rh.bankssts_3)                 |
| 0.00503 | 4.00E-05        | 0.80505         | 0.69347         | (Right-Accumbens-area)(Right-Pallidum)(rh.bankssts_3)(rh.isthmuscingulate_2)        |
| 0.00503 | 4.00E-05        | 0.80505         | 0.69347         | (Right-Accumbens-area)(Right-Pallidum)(rh.bankssts_2)(rh.bankssts_3)                |
| 0.00503 | 4.00E-05        | 0.80505         | 0.69347         | (Right-Accumbens-area)(rh.bankssts_3)(rh.insula_2)(rh.isthmuscingulate_2)           |
| 0.00503 | 4.00E-05        | 0.80505         | 0.69347         | (Right-Accumbens-area)(rh.bankssts_2)(rh.bankssts_3)(rh.isthmuscingulate_2)         |
| 0.00503 | 4.00E-05        | 0.80505         | 0.69347         | (Right-Accumbens-area)(rh.bankssts_3)(rh.insula_2)                                  |
| 0.00503 | 4.00E-05        | 0.80505         | 0.69347         | (Right-Accumbens-area)(Right-Thalamus-Proper)(rh.bankssts_2)(rh.bankssts_3)         |
| 0.0068  | 5.00E-05        | 0.80144         | 0.69347         | (Right-Accumbens-area)(rh.bankssts_3)(rh.insula_5)                                  |
| 0.0068  | 5.00E-05        | 0.80144         | 0.69347         | (Right-Accumbens-area)(Right-Putamen)(rh.bankssts_3)(rh.superiortemporal_9)         |
| 0.0068  | 5.00E-05        | 0.80144         | 0.69347         | (Right-Accumbens-area)(rh.bankssts_3)(rh.insula_5)(rh.lingual_7)                    |
| 0.0068  | 5.00E-05        | 0.80144         | 0.69347         | (Right-Accumbens-area)(rh.bankssts_3)(rh.superiortemporal_9)                        |
| 0.0068  | 5.00E-05        | 0.80144         | 0.69347         | (Right-Accumbens-area)(rh.bankssts_3)(rh.insula_2)(rh.superiortemporal_9)           |
| 0.0068  | 5.00E-05        | 0.80144         | 0.69347         | (Right-Accumbens-area)(Right-Pallidum)(rh.bankssts_3)(rh.superiortemporal_9)        |
| 0.0068  | 5.00E-05        | 0.80144         | 0.69347         | (Right-Accumbens-area)(rh.bankssts_3)(rh.insula_2)(rh.insula_5)                     |
| 0.0068  | 5.00E-05        | 0.80144         | 0.69347         | (Right-Accumbens-area)(rh.bankssts_2)(rh.bankssts_3)(rh.insula_5)                   |

|        |          |         |                                                                                             |
|--------|----------|---------|---------------------------------------------------------------------------------------------|
| 0.0068 | 5.00E-05 | 0.80144 | 0.69347 (Right-Accumbens-area)(Right-Putamen)(rh.bankssts_3)(rh.insula_5)                   |
| 0.0068 | 5.00E-05 | 0.80144 | 0.69347 (Right-Accumbens-area)(rh.bankssts_3)(rh.lingual_7)(rh.superiortemporal_9)          |
| 0.0068 | 5.00E-05 | 0.80144 | 0.69347 (Right-Accumbens-area)(rh.bankssts_3)(rh.isthmuscingulate_2)(rh.superiortemporal_9) |
| 0.0068 | 5.00E-05 | 0.80144 | 0.69347 (Right-Accumbens-area)(Right-Thalamus-Proper)(rh.bankssts_3)(rh.insula_5)           |
| 0.0068 | 5.00E-05 | 0.80144 | 0.69347 (Right-Accumbens-area)(Right-Thalamus-Proper)(rh.bankssts_3)(rh.superiortemporal_9) |
| 0.0068 | 5.00E-05 | 0.80144 | 0.69347 (Right-Accumbens-area)(rh.bankssts_2)(rh.bankssts_3)(rh.superiortemporal_9)         |
| 0.0068 | 5.00E-05 | 0.80144 | 0.69347 (Right-Accumbens-area)(rh.bankssts_3)(rh.insula_5)(rh.isthmuscingulate_2)           |
| 0.0068 | 5.00E-05 | 0.80144 | 0.69347 (Right-Accumbens-area)(Right-Pallidum)(rh.bankssts_3)(rh.insula_5)                  |
