# Supplementary material for: Good neighbors, bad neighbors: the frequent network neighborhood mapping of the hippocampus enlightens several structural factors of the human intelligence on a 414-subject cohort
Source: PubMed Central journal article supplement (PMC7371878; doi:10.1038/s41598-020-68914-2), 2020-07-20
Supplement: 41598_2020_68914_MOESM10_ESM.pdf [file 41598_2020_68914_MOESM10_ESM.pdf]

| p-value | Holm-Bonferroni | frequency_upper | frequency_lower | name                                                                                 |
|---------|-----------------|-----------------|-----------------|--------------------------------------------------------------------------------------|
| 0.00044 | 2.00E-05        | 0.8556          | 0.95477         | (rh.insula_4)(rh.precuneus_2)(rh.precuneus_3)(rh.superiortemporal_1)                 |
| 0.00059 | 2.00E-05        | 0.86643         | 0.9598          | (rh.insula_2)(rh.insula_4)(rh.precuneus_3)(rh.superiortemporal_1)                    |
| 0.00059 | 2.00E-05        | 0.86643         | 0.9598          | (Right-Putamen)(rh.insula_4)(rh.precuneus_3)(rh.superiortemporal_1)                  |
| 0.00059 | 2.00E-05        | 0.86643         | 0.9598          | (Right-Thalamus-Proper)(rh.insula_4)(rh.precuneus_3)(rh.superiortemporal_1)          |
| 0.00059 | 2.00E-05        | 0.86643         | 0.9598          | (rh.insula_4)(rh.precuneus_3)(rh.superiortemporal_1)                                 |
| 0.00059 | 2.00E-05        | 0.86643         | 0.9598          | (rh.insula_4)(rh.isthmuscingulate_2)(rh.precuneus_3)(rh.superiortemporal_1)          |
| 0.00064 | 2.00E-05        | 0.85921         | 0.95477         | (rh.insula_4)(rh.precuneus_3)(rh.superiortemporal_1)(rh.superiortemporal_3)          |
| 0.00067 | 2.00E-05        | 0.85199         | 0.94975         | (rh.inferiorparietal_4)(rh.insula_4)(rh.precuneus_3)(rh.superiortemporal_1)          |
| 0.00129 | 2.00E-05        | 0.86643         | 0.95477         | (rh.insula_4)(rh.lingual_7)(rh.precuneus_3)(rh.superiortemporal_1)                   |
| 0.00129 | 2.00E-05        | 0.86643         | 0.95477         | (rh.bankssts_2)(rh.insula_4)(rh.precuneus_3)(rh.superiortemporal_1)                  |
| 0.00129 | 2.00E-05        | 0.86643         | 0.95477         | (Right-Pallidum)(rh.insula_4)(rh.precuneus_3)(rh.superiortemporal_1)                 |
| 0.00138 | 2.00E-05        | 0.85199         | 0.94472         | (rh.inferiorparietal_10)(rh.insula_4)(rh.precuneus_3)(rh.superiortemporal_1)         |
| 0.00147 | 2.00E-05        | 0.8917          | 0.96985         | (Right-Pallidum)(rh.precuneus_2)(rh.precuneus_3)(rh.superiortemporal_1)              |
| 0.00162 | 2.00E-05        | 0.88448         | 0.96482         | (rh.inferiorparietal_4)(rh.precuneus_2)(rh.precuneus_3)(rh.superiortemporal_1)       |
| 0.00162 | 2.00E-05        | 0.88448         | 0.96482         | (Right-Pallidum)(rh.inferiorparietal_4)(rh.precuneus_3)(rh.superiortemporal_1)       |
| 0.00187 | 2.00E-05        | 0.76056         | 0.87437         | (rh.insula_4)(rh.precuneus_3)(rh.superiortemporal_1)(rh.transversetemporal_1)        |
| 0.00187 | 2.00E-05        | 0.76056         | 0.87437         | (rh.insula_4)(rh.precuneus_3)(rh.supramarginal_9)(rh.transversetemporal_1)           |
| 0.00187 | 2.00E-05        | 0.76056         | 0.87437         | (rh.insula_4)(rh.parahippocampal_1)(rh.precuneus_3)(rh.superiortemporal_1)           |
| 0.00187 | 2.00E-05        | 0.77978         | 0.88945         | (Right-Putamen)(rh.insula_4)(rh.superiortemporal_1)(rh.transversetemporal_1)         |
| 0.00187 | 2.00E-05        | 0.77978         | 0.88945         | (rh.insula_2)(rh.insula_4)(rh.superiortemporal_1)(rh.transversetemporal_1)           |
| 0.00187 | 2.00E-05        | 0.77978         | 0.88945         | (Right-Thalamus-Proper)(rh.insula_4)(rh.superiortemporal_1)(rh.transversetemporal_1) |
| 0.00187 | 2.00E-05        | 0.77978         | 0.88945         | (rh.insula_4)(rh.isthmuscingulate_2)(rh.superiortemporal_1)(rh.transversetemporal_1) |
| 0.00188 | 2.00E-05        | 0.90253         | 0.97487         | (Right-Pallidum)(rh.isthmuscingulate_2)(rh.precuneus_3)(rh.superiortemporal_1)       |
| 0.00188 | 2.00E-05        | 0.90253         | 0.97487         | (Right-Pallidum)(Right-Thalamus-Proper)(rh.precuneus_3)(rh.superiortemporal_1)       |
| 0.00188 | 2.00E-05        | 0.90253         | 0.97487         | (Right-Putamen)(rh.insula_4)(rh.isthmuscingulate_2)(rh.superiortemporal_1)           |
| 0.00188 | 2.00E-05        | 0.90253         | 0.97487         | (rh.insula_2)(rh.insula_4)(rh.isthmuscingulate_2)(rh.superiortemporal_1)             |
| 0.00188 | 2.00E-05        | 0.90253         | 0.97487         | (Right-Pallidum)(Right-Putamen)(rh.precuneus_3)(rh.superiortemporal_1)               |
| 0.00188 | 2.00E-05        | 0.90253         | 0.97487         | (rh.insula_4)(rh.isthmuscingulate_2)(rh.superiortemporal_1)                          |
| 0.00188 | 2.00E-05        | 0.90253         | 0.97487         | (Right-Thalamus-Proper)(rh.insula_2)(rh.insula_4)(rh.superiortemporal_1)             |
| 0.00188 | 2.00E-05        | 0.90253         | 0.97487         | (Right-Thalamus-Proper)(rh.insula_4)(rh.superiortemporal_1)                          |
| 0.00188 | 2.00E-05        | 0.90253         | 0.97487         | (Right-Thalamus-Proper)(rh.insula_4)(rh.isthmuscingulate_2)(rh.superiortemporal_1)   |
| 0.00188 | 2.00E-05        | 0.90253         | 0.97487         | (Right-Putamen)(rh.insula_4)(rh.superiortemporal_1)                                  |
| 0.00188 | 2.00E-05        | 0.90253         | 0.97487         | (Right-Pallidum)(rh.precuneus_3)(rh.superiortemporal_1)                              |
| 0.00188 | 2.00E-05        | 0.90253         | 0.97487         | (rh.insula_4)(rh.superiortemporal_1)                                                 |
| 0.00188 | 2.00E-05        | 0.90253         | 0.97487         | (rh.insula_2)(rh.insula_4)(rh.superiortemporal_1)                                    |

|         |          |         |         |                                                                                       |
|---------|----------|---------|---------|---------------------------------------------------------------------------------------|
| 0.00188 | 2.00E-05 | 0.90253 | 0.97487 | (Right-Putamen)(rh.insula_2)(rh.insula_4)(rh.superiortemporal_1)                      |
| 0.00188 | 2.00E-05 | 0.90253 | 0.97487 | (Right-Putamen)(Right-Thalamus-Proper)(rh.insula_4)(rh.superiortemporal_1)            |
| 0.00198 | 2.00E-05 | 0.76761 | 0.8794  | (rh.inferiorparietal_4)(rh.insula_4)(rh.supramarginal_9)(rh.transversetemporal_1)     |
| 0.00198 | 2.00E-05 | 0.76761 | 0.8794  | (rh.inferiorparietal_4)(rh.insula_4)(rh.superiortemporal_1)(rh.transversetemporal_1)  |
| 0.00208 | 2.00E-05 | 0.77465 | 0.88442 | (rh.insula_4)(rh.precuneus_2)(rh.supramarginal_9)(rh.transversetemporal_1)            |
| 0.00208 | 2.00E-05 | 0.77465 | 0.88442 | (rh.insula_4)(rh.superiortemporal_1)(rh.superiortemporal_3)(rh.transversetemporal_1)  |
| 0.00208 | 2.00E-05 | 0.77465 | 0.88442 | (rh.insula_4)(rh.superiortemporal_1)(rh.supramarginal_9)(rh.transversetemporal_1)     |
| 0.00208 | 2.00E-05 | 0.77465 | 0.88442 | (rh.insula_4)(rh.precuneus_2)(rh.superiortemporal_1)(rh.transversetemporal_1)         |
| 0.00208 | 2.00E-05 | 0.77465 | 0.88442 | (rh.insula_4)(rh.superiortemporal_3)(rh.supramarginal_9)(rh.transversetemporal_1)     |
| 0.00212 | 2.00E-05 | 0.89531 | 0.96985 | (rh.insula_2)(rh.insula_4)(rh.superiortemporal_1)(rh.superiortemporal_3)              |
| 0.00212 | 2.00E-05 | 0.89531 | 0.96985 | (Right-Putamen)(rh.insula_4)(rh.superiortemporal_1)(rh.superiortemporal_3)            |
| 0.00212 | 2.00E-05 | 0.89531 | 0.96985 | (rh.insula_4)(rh.isthmuscingulate_2)(rh.superiortemporal_1)(rh.superiortemporal_3)    |
| 0.00212 | 2.00E-05 | 0.89531 | 0.96985 | (Right-Putamen)(rh.inferiorparietal_4)(rh.precuneus_3)(rh.superiortemporal_1)         |
| 0.00212 | 2.00E-05 | 0.89531 | 0.96985 | (Right-Thalamus-Proper)(rh.inferiorparietal_4)(rh.precuneus_3)(rh.superiortemporal_1) |
| 0.00212 | 2.00E-05 | 0.89531 | 0.96985 | (rh.insula_2)(rh.precuneus_2)(rh.precuneus_3)(rh.superiortemporal_1)                  |
| 0.00212 | 2.00E-05 | 0.89531 | 0.96985 | (rh.inferiorparietal_4)(rh.isthmuscingulate_2)(rh.precuneus_3)(rh.superiortemporal_1) |
| 0.00212 | 2.00E-05 | 0.89531 | 0.96985 | (rh.inferiorparietal_4)(rh.precuneus_3)(rh.superiortemporal_1)                        |
| 0.00212 | 2.00E-05 | 0.89531 | 0.96985 | (Right-Thalamus-Proper)(rh.insula_4)(rh.superiortemporal_1)(rh.superiortemporal_3)    |
| 0.00212 | 2.00E-05 | 0.89531 | 0.96985 | (rh.insula_4)(rh.superiortemporal_1)(rh.superiortemporal_3)                           |
| 0.00218 | 2.00E-05 | 0.78169 | 0.88945 | (rh.insula_4)(rh.supramarginal_9)(rh.transversetemporal_1)                            |
| 0.00218 | 2.00E-05 | 0.78169 | 0.88945 | (rh.insula_4)(rh.superiortemporal_1)(rh.transversetemporal_1)                         |
| 0.00231 | 3.00E-05 | 0.88809 | 0.96482 | (Right-Putamen)(rh.inferiorparietal_4)(rh.insula_4)(rh.superiortemporal_1)            |
| 0.00231 | 3.00E-05 | 0.88809 | 0.96482 | (rh.insula_2)(rh.insula_4)(rh.precuneus_2)(rh.superiortemporal_1)                     |
| 0.00231 | 3.00E-05 | 0.88809 | 0.96482 | (rh.inferiorparietal_4)(rh.insula_4)(rh.superiortemporal_1)                           |
| 0.00231 | 3.00E-05 | 0.88809 | 0.96482 | (Right-Thalamus-Proper)(rh.insula_4)(rh.precuneus_2)(rh.superiortemporal_1)           |
| 0.00231 | 3.00E-05 | 0.88809 | 0.96482 | (rh.inferiorparietal_4)(rh.insula_2)(rh.precuneus_3)(rh.superiortemporal_1)           |
| 0.00231 | 3.00E-05 | 0.88809 | 0.96482 | (rh.insula_4)(rh.isthmuscingulate_2)(rh.precuneus_2)(rh.superiortemporal_1)           |
| 0.00231 | 3.00E-05 | 0.88809 | 0.96482 | (Right-Thalamus-Proper)(rh.inferiorparietal_4)(rh.insula_4)(rh.superiortemporal_1)    |
| 0.00231 | 3.00E-05 | 0.88809 | 0.96482 | (rh.insula_4)(rh.precuneus_2)(rh.superiortemporal_1)                                  |
| 0.00231 | 3.00E-05 | 0.88809 | 0.96482 | (Right-Putamen)(rh.insula_4)(rh.precuneus_2)(rh.superiortemporal_1)                   |
| 0.00231 | 3.00E-05 | 0.88809 | 0.96482 | (rh.inferiorparietal_4)(rh.insula_4)(rh.isthmuscingulate_2)(rh.superiortemporal_1)    |
| 0.00231 | 3.00E-05 | 0.88809 | 0.96482 | (rh.inferiorparietal_4)(rh.insula_2)(rh.insula_4)(rh.superiortemporal_1)              |
| 0.00247 | 3.00E-05 | 0.88087 | 0.9598  | (rh.inferiorparietal_4)(rh.insula_4)(rh.superiortemporal_1)(rh.superiortemporal_3)    |
| 0.00247 | 3.00E-05 | 0.88087 | 0.9598  | (rh.insula_4)(rh.precuneus_2)(rh.superiortemporal_1)(rh.superiortemporal_3)           |
| 0.00258 | 3.00E-05 | 0.87365 | 0.95477 | (rh.inferiorparietal_4)(rh.insula_4)(rh.precuneus_2)(rh.superiortemporal_1)           |
| 0.00269 | 3.00E-05 | 0.85921 | 0.94472 | (Right-Caudate)(rh.insula_4)(rh.precuneus_3)(rh.superiortemporal_1)                   |

|         |          |         |         |                                                                                       |
|---------|----------|---------|---------|---------------------------------------------------------------------------------------|
| 0.00269 | 3.00E-05 | 0.85921 | 0.94472 | (rh.insula_4)(rh.precuneus_3)(rh.superiortemporal_1)(rh.supramarginal_9)              |
| 0.00269 | 3.00E-05 | 0.85199 | 0.9397  | (rh.insula_4)(rh.parahippocampal_2)(rh.precuneus_3)(rh.superiortemporal_1)            |
| 0.00272 | 3.00E-05 | 0.90614 | 0.97487 | (rh.precuneus_2)(rh.precuneus_3)(rh.superiortemporal_1)                               |
| 0.00272 | 3.00E-05 | 0.90614 | 0.97487 | (rh.isthmuscingulate_2)(rh.precuneus_2)(rh.precuneus_3)(rh.superiortemporal_1)        |
| 0.00272 | 3.00E-05 | 0.90614 | 0.97487 | (Right-Putamen)(rh.precuneus_2)(rh.precuneus_3)(rh.superiortemporal_1)                |
| 0.00272 | 3.00E-05 | 0.90614 | 0.97487 | (rh.insula_2)(rh.isthmuscingulate_2)(rh.precuneus_3)(rh.superiortemporal_1)           |
| 0.00272 | 3.00E-05 | 0.90614 | 0.97487 | (Right-Thalamus-Proper)(rh.insula_2)(rh.precuneus_3)(rh.superiortemporal_1)           |
| 0.00272 | 3.00E-05 | 0.90614 | 0.97487 | (Right-Putamen)(rh.insula_2)(rh.precuneus_3)(rh.superiortemporal_1)                   |
| 0.00272 | 3.00E-05 | 0.90614 | 0.97487 | (Right-Thalamus-Proper)(rh.precuneus_2)(rh.precuneus_3)(rh.superiortemporal_1)        |
| 0.00272 | 3.00E-05 | 0.90614 | 0.97487 | (rh.insula_2)(rh.precuneus_3)(rh.superiortemporal_1)                                  |
| 0.00293 | 3.00E-05 | 0.77256 | 0.8794  | (Right-Caudate)(rh.insula_4)(rh.superiortemporal_1)(rh.transversetemporal_1)          |
| 0.00304 | 3.00E-05 | 0.89892 | 0.96985 | (Right-Pallidum)(rh.insula_2)(rh.precuneus_3)(rh.superiortemporal_1)                  |
| 0.00314 | 3.00E-05 | 0.77978 | 0.88442 | (Right-Pallidum)(rh.insula_4)(rh.superiortemporal_1)(rh.transversetemporal_1)         |
| 0.00326 | 3.00E-05 | 0.76761 | 0.87437 | (rh.inferiorparietal_10)(rh.insula_4)(rh.superiortemporal_1)(rh.transversetemporal_1) |
| 0.00326 | 3.00E-05 | 0.76761 | 0.87437 | (rh.inferiorparietal_10)(rh.insula_4)(rh.supramarginal_9)(rh.transversetemporal_1)    |
| 0.00335 | 3.00E-05 | 0.787   | 0.88945 | (Right-Thalamus-Proper)(rh.insula_4)(rh.supramarginal_9)(rh.transversetemporal_1)     |
| 0.00335 | 3.00E-05 | 0.787   | 0.88945 | (rh.insula_4)(rh.isthmuscingulate_2)(rh.supramarginal_9)(rh.transversetemporal_1)     |
| 0.00335 | 3.00E-05 | 0.787   | 0.88945 | (Right-Putamen)(rh.insula_4)(rh.supramarginal_9)(rh.transversetemporal_1)             |
| 0.00335 | 3.00E-05 | 0.787   | 0.88945 | (rh.insula_2)(rh.insula_4)(rh.supramarginal_9)(rh.transversetemporal_1)               |
| 0.00341 | 3.00E-05 | 0.91697 | 0.9799  | (Right-Putamen)(rh.precuneus_3)(rh.superiortemporal_1)                                |
| 0.00341 | 3.00E-05 | 0.91697 | 0.9799  | (Right-Putamen)(Right-Thalamus-Proper)(rh.precuneus_3)(rh.superiortemporal_1)         |
| 0.00341 | 3.00E-05 | 0.91697 | 0.9799  | (Right-Thalamus-Proper)(rh.isthmuscingulate_2)(rh.precuneus_3)(rh.superiortemporal_1) |
| 0.00341 | 3.00E-05 | 0.91697 | 0.9799  | (Right-Thalamus-Proper)(rh.precuneus_3)(rh.superiortemporal_1)                        |
| 0.00341 | 3.00E-05 | 0.91697 | 0.9799  | (rh.precuneus_3)(rh.superiortemporal_1)                                               |
| 0.00341 | 3.00E-05 | 0.91697 | 0.9799  | (rh.isthmuscingulate_2)(rh.precuneus_3)(rh.superiortemporal_1)                        |
| 0.00341 | 3.00E-05 | 0.91697 | 0.9799  | (Right-Putamen)(rh.isthmuscingulate_2)(rh.precuneus_3)(rh.superiortemporal_1)         |
| 0.00345 | 3.00E-05 | 0.77465 | 0.8794  | (rh.insula_4)(rh.precuneus_2)(rh.precuneus_3)(rh.transversetemporal_1)                |
| 0.00365 | 3.00E-05 | 0.78169 | 0.88442 | (rh.insula_4)(rh.lingual_7)(rh.superiortemporal_1)(rh.transversetemporal_1)           |
| 0.00365 | 3.00E-05 | 0.78169 | 0.88442 | (rh.bankssts_2)(rh.insula_4)(rh.supramarginal_9)(rh.transversetemporal_1)             |
| 0.00365 | 3.00E-05 | 0.78169 | 0.88442 | (rh.insula_4)(rh.isthmuscingulate_1)(rh.precuneus_3)(rh.superiortemporal_1)           |
| 0.00365 | 3.00E-05 | 0.78169 | 0.88442 | (rh.bankssts_2)(rh.insula_4)(rh.superiortemporal_1)(rh.transversetemporal_1)          |
| 0.00365 | 3.00E-05 | 0.78169 | 0.88442 | (rh.insula_4)(rh.lingual_7)(rh.supramarginal_9)(rh.transversetemporal_1)              |
| 0.00384 | 3.00E-05 | 0.78873 | 0.88945 | (rh.insula_2)(rh.parahippocampal_1)(rh.precuneus_3)(rh.superiortemporal_1)            |
| 0.00434 | 3.00E-05 | 0.90253 | 0.96985 | (rh.bankssts_2)(rh.insula_2)(rh.insula_4)(rh.superiortemporal_1)                      |
| 0.00434 | 3.00E-05 | 0.90253 | 0.96985 | (rh.insula_2)(rh.insula_4)(rh.lingual_7)(rh.superiortemporal_1)                       |
| 0.00434 | 3.00E-05 | 0.90253 | 0.96985 | (Right-Pallidum)(Right-Thalamus-Proper)(rh.insula_4)(rh.superiortemporal_1)           |

|         |          |         |         |                                                                                        |
|---------|----------|---------|---------|----------------------------------------------------------------------------------------|
| 0.00434 | 3.00E-05 | 0.90253 | 0.96985 | (rh.bankssts_2)(rh.insula_4)(rh.isthmuscingulate_2)(rh.superiortemporal_1)             |
| 0.00434 | 3.00E-05 | 0.90253 | 0.96985 | (Right-Pallidum)(Right-Putamen)(rh.insula_4)(rh.superiortemporal_1)                    |
| 0.00434 | 3.00E-05 | 0.90253 | 0.96985 | (Right-Putamen)(rh.bankssts_2)(rh.insula_4)(rh.superiortemporal_1)                     |
| 0.00434 | 3.00E-05 | 0.90253 | 0.96985 | (rh.insula_4)(rh.isthmuscingulate_2)(rh.lingual_7)(rh.superiortemporal_1)              |
| 0.00434 | 3.00E-05 | 0.90253 | 0.96985 | (Right-Thalamus-Proper)(rh.bankssts_2)(rh.insula_4)(rh.superiortemporal_1)             |
| 0.00434 | 3.00E-05 | 0.90253 | 0.96985 | (Right-Pallidum)(rh.lingual_7)(rh.precuneus_3)(rh.superiortemporal_1)                  |
| 0.00434 | 3.00E-05 | 0.90253 | 0.96985 | (Right-Putamen)(rh.insula_4)(rh.lingual_7)(rh.superiortemporal_1)                      |
| 0.00434 | 3.00E-05 | 0.90253 | 0.96985 | (Right-Pallidum)(rh.insula_4)(rh.isthmuscingulate_2)(rh.superiortemporal_1)            |
| 0.00434 | 3.00E-05 | 0.90253 | 0.96985 | (rh.insula_4)(rh.lingual_7)(rh.superiortemporal_1)                                     |
| 0.00434 | 3.00E-05 | 0.90253 | 0.96985 | (Right-Pallidum)(rh.insula_2)(rh.insula_4)(rh.superiortemporal_1)                      |
| 0.00434 | 3.00E-05 | 0.90253 | 0.96985 | (Right-Thalamus-Proper)(rh.insula_4)(rh.lingual_7)(rh.superiortemporal_1)              |
| 0.00434 | 3.00E-05 | 0.90253 | 0.96985 | (Right-Pallidum)(rh.bankssts_2)(rh.precuneus_3)(rh.superiortemporal_1)                 |
| 0.00434 | 3.00E-05 | 0.90253 | 0.96985 | (Right-Pallidum)(rh.insula_4)(rh.superiortemporal_1)                                   |
| 0.00434 | 3.00E-05 | 0.90253 | 0.96985 | (rh.bankssts_2)(rh.insula_4)(rh.superiortemporal_1)                                    |
| 0.00445 | 3.00E-05 | 0.79061 | 0.88945 | (Right-Putamen)(rh.insula_4)(rh.precuneus_2)(rh.transversetemporal_1)                  |
| 0.00445 | 3.00E-05 | 0.79061 | 0.88945 | (Right-Thalamus-Proper)(rh.insula_4)(rh.precuneus_2)(rh.transversetemporal_1)          |
| 0.00445 | 3.00E-05 | 0.79061 | 0.88945 | (rh.insula_2)(rh.insula_4)(rh.precuneus_2)(rh.transversetemporal_1)                    |
| 0.00445 | 3.00E-05 | 0.79061 | 0.88945 | (rh.insula_4)(rh.isthmuscingulate_2)(rh.precuneus_2)(rh.transversetemporal_1)          |
| 0.00452 | 3.00E-05 | 0.71119 | 0.82412 | (rh.fusiform_5)(rh.insula_4)(rh.superiortemporal_1)(rh.transversetemporal_1)           |
| 0.00466 | 3.00E-05 | 0.89531 | 0.96482 | (rh.insula_4)(rh.lingual_7)(rh.superiortemporal_1)(rh.superiortemporal_3)              |
| 0.00466 | 3.00E-05 | 0.89531 | 0.96482 | (rh.inferiorparietal_4)(rh.lingual_7)(rh.precuneus_3)(rh.superiortemporal_1)           |
| 0.00466 | 3.00E-05 | 0.89531 | 0.96482 | (rh.bankssts_2)(rh.inferiorparietal_4)(rh.precuneus_3)(rh.superiortemporal_1)          |
| 0.00466 | 3.00E-05 | 0.89531 | 0.96482 | (rh.bankssts_2)(rh.insula_4)(rh.superiortemporal_1)(rh.superiortemporal_3)             |
| 0.00466 | 3.00E-05 | 0.89531 | 0.96482 | (Right-Pallidum)(rh.insula_4)(rh.superiortemporal_1)(rh.superiortemporal_3)            |
| 0.00478 | 3.00E-05 | 0.93863 | 0.98995 | (Right-Pallidum)(rh.superiortemporal_1)                                                |
| 0.00478 | 3.00E-05 | 0.93863 | 0.98995 | (Right-Pallidum)(Right-Putamen)(rh.isthmuscingulate_2)(rh.superiortemporal_1)          |
| 0.00478 | 3.00E-05 | 0.93863 | 0.98995 | (Right-Pallidum)(Right-Thalamus-Proper)(rh.isthmuscingulate_2)(rh.superiortemporal_1)  |
| 0.00478 | 3.00E-05 | 0.93863 | 0.98995 | (Right-Pallidum)(Right-Thalamus-Proper)(rh.superiortemporal_1)                         |
| 0.00478 | 3.00E-05 | 0.93863 | 0.98995 | (Right-Pallidum)(Right-Putamen)(Right-Thalamus-Proper)(rh.superiortemporal_1)          |
| 0.00478 | 3.00E-05 | 0.93863 | 0.98995 | (Right-Pallidum)(rh.isthmuscingulate_2)(rh.superiortemporal_1)                         |
| 0.00478 | 3.00E-05 | 0.93863 | 0.98995 | (Right-Pallidum)(Right-Putamen)(rh.superiortemporal_1)                                 |
| 0.00483 | 3.00E-05 | 0.70036 | 0.81407 | (rh.lateraloccipital_10)(rh.precuneus_3)(rh.superiortemporal_1)(rh.superiortemporal_6) |
| 0.0049  | 3.00E-05 | 0.88809 | 0.9598  | (rh.bankssts_2)(rh.insula_4)(rh.precuneus_2)(rh.superiortemporal_1)                    |
| 0.0049  | 3.00E-05 | 0.88809 | 0.9598  | (Right-Pallidum)(rh.insula_4)(rh.precuneus_2)(rh.superiortemporal_1)                   |
| 0.0049  | 3.00E-05 | 0.88809 | 0.9598  | (rh.inferiorparietal_10)(rh.insula_4)(rh.superiortemporal_1)                           |
| 0.0049  | 3.00E-05 | 0.88809 | 0.9598  | (Right-Thalamus-Proper)(rh.inferiorparietal_10)(rh.insula_4)(rh.superiortemporal_1)    |

|         |          |         |         |                                                                                        |
|---------|----------|---------|---------|----------------------------------------------------------------------------------------|
| 0.0049  | 3.00E-05 | 0.88809 | 0.9598  | (rh.inferiorparietal_10)(rh.insula_2)(rh.insula_4)(rh.superiortemporal_1)              |
| 0.0049  | 3.00E-05 | 0.88809 | 0.9598  | (rh.insula_4)(rh.lingual_7)(rh.precuneus_2)(rh.superiortemporal_1)                     |
| 0.0049  | 3.00E-05 | 0.88809 | 0.9598  | (rh.inferiorparietal_4)(rh.insula_4)(rh.lingual_7)(rh.superiortemporal_1)              |
| 0.0049  | 3.00E-05 | 0.88809 | 0.9598  | (Right-Putamen)(rh.inferiorparietal_10)(rh.insula_4)(rh.superiortemporal_1)            |
| 0.0049  | 3.00E-05 | 0.88809 | 0.9598  | (Right-Pallidum)(rh.inferiorparietal_10)(rh.precuneus_3)(rh.superiortemporal_1)        |
| 0.0049  | 3.00E-05 | 0.88809 | 0.9598  | (rh.inferiorparietal_10)(rh.insula_4)(rh.isthmuscingulate_2)(rh.superiortemporal_1)    |
| 0.0049  | 3.00E-05 | 0.88809 | 0.9598  | (rh.bankssts_2)(rh.inferiorparietal_4)(rh.insula_4)(rh.superiortemporal_1)             |
| 0.0049  | 3.00E-05 | 0.88809 | 0.9598  | (Right-Pallidum)(rh.inferiorparietal_4)(rh.insula_4)(rh.superiortemporal_1)            |
| 0.00497 | 3.00E-05 | 0.92058 | 0.9799  | (Right-Pallidum)(Right-Thalamus-Proper)(rh.inferiorparietal_4)(rh.superiortemporal_1)  |
| 0.00497 | 3.00E-05 | 0.92058 | 0.9799  | (Right-Pallidum)(Right-Putamen)(rh.inferiorparietal_4)(rh.superiortemporal_1)          |
| 0.00497 | 3.00E-05 | 0.92058 | 0.9799  | (Right-Pallidum)(rh.inferiorparietal_4)(rh.isthmuscingulate_2)(rh.superiortemporal_1)  |
| 0.00497 | 3.00E-05 | 0.92058 | 0.9799  | (Right-Pallidum)(rh.inferiorparietal_4)(rh.superiortemporal_1)                         |
| 0.00505 | 4.00E-05 | 0.88087 | 0.95477 | (rh.inferiorparietal_10)(rh.insula_4)(rh.superiortemporal_1)(rh.superiortemporal_3)    |
| 0.00505 | 4.00E-05 | 0.88087 | 0.95477 | (rh.inferiorparietal_4)(rh.precuneus_3)(rh.superiortemporal_1)(rh.superiortemporal_3)  |
| 0.00505 | 4.00E-05 | 0.88087 | 0.95477 | (rh.insula_4)(rh.precuneus_2)(rh.superiortemporal_1)(rh.supramarginal_9)               |
| 0.00505 | 4.00E-05 | 0.88087 | 0.95477 | (rh.inferiorparietal_10)(rh.inferiorparietal_4)(rh.precuneus_3)(rh.superiortemporal_1) |
| 0.00512 | 4.00E-05 | 0.87365 | 0.94975 | (rh.inferiorparietal_10)(rh.insula_4)(rh.precuneus_2)(rh.superiortemporal_1)           |
| 0.00512 | 4.00E-05 | 0.87365 | 0.94975 | (rh.inferiorparietal_10)(rh.inferiorparietal_4)(rh.insula_4)(rh.superiortemporal_1)    |
| 0.00512 | 4.00E-05 | 0.87365 | 0.94975 | (rh.insula_4)(rh.precuneus_2)(rh.precuneus_3)(rh.supramarginal_9)                      |
| 0.00512 | 4.00E-05 | 0.87365 | 0.94975 | (rh.inferiorparietal_4)(rh.insula_4)(rh.precuneus_2)(rh.precuneus_3)                   |
| 0.00513 | 4.00E-05 | 0.77978 | 0.8794  | (Right-Putamen)(rh.insula_4)(rh.precuneus_3)(rh.transversetemporal_1)                  |
| 0.00513 | 4.00E-05 | 0.77978 | 0.8794  | (Right-Caudate)(rh.insula_4)(rh.supramarginal_9)(rh.transversetemporal_1)              |
| 0.00513 | 4.00E-05 | 0.77978 | 0.8794  | (rh.insula_2)(rh.insula_4)(rh.precuneus_3)(rh.transversetemporal_1)                    |
| 0.00513 | 4.00E-05 | 0.77978 | 0.8794  | (rh.insula_4)(rh.isthmuscingulate_2)(rh.precuneus_3)(rh.transversetemporal_1)          |
| 0.00513 | 4.00E-05 | 0.77978 | 0.8794  | (Right-Thalamus-Proper)(rh.insula_4)(rh.precuneus_3)(rh.transversetemporal_1)          |
| 0.00524 | 4.00E-05 | 0.76761 | 0.86935 | (rh.inferiorparietal_4)(rh.middletemporal_1)(rh.precuneus_3)(rh.superiortemporal_1)    |
| 0.00524 | 4.00E-05 | 0.76761 | 0.86935 | (rh.inferiorparietal_4)(rh.insula_4)(rh.precuneus_3)(rh.transversetemporal_1)          |
| 0.0055  | 4.00E-05 | 0.787   | 0.88442 | (Right-Pallidum)(rh.insula_4)(rh.supramarginal_9)(rh.transversetemporal_1)             |
| 0.0055  | 4.00E-05 | 0.787   | 0.88442 | (rh.inferiorparietal_4)(rh.insula_4)(rh.isthmuscingulate_2)(rh.transversetemporal_1)   |
| 0.0055  | 4.00E-05 | 0.787   | 0.88442 | (Right-Thalamus-Proper)(rh.inferiorparietal_4)(rh.insula_4)(rh.transversetemporal_1)   |
| 0.0055  | 4.00E-05 | 0.787   | 0.88442 | (Right-Putamen)(rh.inferiorparietal_4)(rh.insula_4)(rh.transversetemporal_1)           |
| 0.0055  | 4.00E-05 | 0.787   | 0.88442 | (rh.inferiorparietal_4)(rh.insula_2)(rh.insula_4)(rh.transversetemporal_1)             |
| 0.00558 | 4.00E-05 | 0.77465 | 0.87437 | (rh.insula_4)(rh.precuneus_3)(rh.superiortemporal_3)(rh.transversetemporal_1)          |
| 0.0058  | 4.00E-05 | 0.76895 | 0.86935 | (rh.inferiorparietal_4)(rh.lateraloccipital_10)(rh.precuneus_3)(rh.superiortemporal_1) |
| 0.00592 | 4.00E-05 | 0.78169 | 0.8794  | (rh.insula_4)(rh.precuneus_3)(rh.transversetemporal_1)                                 |
| 0.00592 | 4.00E-05 | 0.78169 | 0.8794  | (rh.inferiorparietal_10)(rh.inferiortemporal_2)(rh.precuneus_3)(rh.superiortemporal_1) |

|         |          |         |         |                                                                                          |
|---------|----------|---------|---------|------------------------------------------------------------------------------------------|
| 0.00592 | 4.00E-05 | 0.78169 | 0.8794  | (rh.inferiorparietal_4)(rh.insula_4)(rh.superiortemporal_3)(rh.transversetemporal_1)     |
| 0.00592 | 4.00E-05 | 0.78169 | 0.8794  | (rh.inferiorparietal_4)(rh.inferiortemporal_2)(rh.precuneus_3)(rh.superiortemporal_1)    |
| 0.00592 | 4.00E-05 | 0.78169 | 0.8794  | (rh.inferiorparietal_4)(rh.insula_4)(rh.precuneus_2)(rh.transversetemporal_1)            |
| 0.00609 | 4.00E-05 | 0.93141 | 0.98492 | (Right-Putamen)(Right-Thalamus-Proper)(rh.inferiorparietal_4)(rh.superiortemporal_1)     |
| 0.00609 | 4.00E-05 | 0.93141 | 0.98492 | (Right-Putamen)(rh.inferiorparietal_4)(rh.superiortemporal_1)                            |
| 0.00609 | 4.00E-05 | 0.93141 | 0.98492 | (Right-Thalamus-Proper)(rh.inferiorparietal_4)(rh.isthmuscingulate_2)(rh.superiortempora |
| 0.00609 | 4.00E-05 | 0.93141 | 0.98492 | (Right-Putamen)(rh.inferiorparietal_4)(rh.isthmuscingulate_2)(rh.superiortemporal_1)     |
| 0.00609 | 4.00E-05 | 0.93141 | 0.98492 | (rh.inferiorparietal_4)(rh.isthmuscingulate_2)(rh.superiortemporal_1)                    |
| 0.00609 | 4.00E-05 | 0.93141 | 0.98492 | (Right-Thalamus-Proper)(rh.inferiorparietal_4)(rh.superiortemporal_1)                    |
| 0.00609 | 4.00E-05 | 0.93141 | 0.98492 | (rh.inferiorparietal_4)(rh.superiortemporal_1)                                           |
| 0.00617 | 4.00E-05 | 0.83394 | 0.9196  | (rh.insula_4)(rh.middletemporal_4)(rh.precuneus_3)(rh.superiortemporal_1)                |
| 0.00618 | 4.00E-05 | 0.90614 | 0.96985 | (rh.insula_2)(rh.lingual_7)(rh.precuneus_3)(rh.superiortemporal_1)                       |
| 0.00618 | 4.00E-05 | 0.90614 | 0.96985 | (rh.bankssts_2)(rh.insula_2)(rh.precuneus_3)(rh.superiortemporal_1)                      |
| 0.00618 | 4.00E-05 | 0.90614 | 0.96985 | (Right-Pallidum)(rh.inferiorparietal_4)(rh.precuneus_2)(rh.superiortemporal_1)           |
| 0.00618 | 4.00E-05 | 0.90614 | 0.96985 | (rh.bankssts_2)(rh.precuneus_2)(rh.precuneus_3)(rh.superiortemporal_1)                   |
| 0.00618 | 4.00E-05 | 0.90614 | 0.96985 | (rh.lingual_7)(rh.precuneus_2)(rh.precuneus_3)(rh.superiortemporal_1)                    |
| 0.00625 | 4.00E-05 | 0.77617 | 0.87437 | (Right-Pallidum)(rh.lateraloccipital_10)(rh.precuneus_3)(rh.superiortemporal_1)          |
| 0.00627 | 4.00E-05 | 0.78873 | 0.88442 | (rh.inferiortemporal_2)(rh.precuneus_2)(rh.precuneus_3)(rh.superiortemporal_1)           |
| 0.00627 | 4.00E-05 | 0.78873 | 0.88442 | (rh.inferiorparietal_4)(rh.insula_4)(rh.transversetemporal_1)                            |
| 0.00627 | 4.00E-05 | 0.78873 | 0.88442 | (rh.insula_2)(rh.precuneus_3)(rh.superiortemporal_1)(rh.transversetemporal_1)            |
| 0.00627 | 4.00E-05 | 0.78873 | 0.88442 | (rh.insula_4)(rh.precuneus_2)(rh.superiortemporal_3)(rh.transversetemporal_1)            |
| 0.00627 | 4.00E-05 | 0.80144 | 0.89447 | (Right-Thalamus-Proper)(rh.insula_4)(rh.isthmuscingulate_2)(rh.transversetemporal_1)     |
| 0.00627 | 4.00E-05 | 0.80144 | 0.89447 | (rh.fusiform_5)(rh.inferiorparietal_4)(rh.insula_4)(rh.superiortemporal_1)               |
| 0.00627 | 4.00E-05 | 0.80144 | 0.89447 | (rh.insula_4)(rh.isthmuscingulate_2)(rh.transversetemporal_1)                            |
| 0.00627 | 4.00E-05 | 0.80144 | 0.89447 | (rh.insula_2)(rh.insula_4)(rh.isthmuscingulate_2)(rh.transversetemporal_1)               |
| 0.00627 | 4.00E-05 | 0.80144 | 0.89447 | (Right-Putamen)(rh.insula_2)(rh.insula_4)(rh.transversetemporal_1)                       |
| 0.00627 | 4.00E-05 | 0.80144 | 0.89447 | (Right-Putamen)(rh.insula_4)(rh.isthmuscingulate_2)(rh.transversetemporal_1)             |
| 0.00627 | 4.00E-05 | 0.80144 | 0.89447 | (rh.insula_2)(rh.insula_4)(rh.transversetemporal_1)                                      |
| 0.00627 | 4.00E-05 | 0.80144 | 0.89447 | (Right-Thalamus-Proper)(rh.insula_2)(rh.insula_4)(rh.transversetemporal_1)               |
| 0.00627 | 4.00E-05 | 0.80144 | 0.89447 | (Right-Thalamus-Proper)(rh.insula_4)(rh.transversetemporal_1)                            |
| 0.00627 | 5.00E-05 | 0.80144 | 0.89447 | (Right-Putamen)(Right-Thalamus-Proper)(rh.insula_4)(rh.transversetemporal_1)             |
| 0.00627 | 5.00E-05 | 0.80144 | 0.89447 | (Right-Putamen)(rh.insula_4)(rh.transversetemporal_1)                                    |
| 0.00627 | 5.00E-05 | 0.80144 | 0.89447 | (rh.insula_4)(rh.transversetemporal_1)                                                   |
| 0.00645 | 5.00E-05 | 0.75812 | 0.8593  | (rh.inferiorparietal_4)(rh.insula_4)(rh.lateraloccipital_10)(rh.precuneus_3)             |
| 0.00658 | 5.00E-05 | 0.89892 | 0.96482 | (rh.insula_2)(rh.precuneus_3)(rh.superiortemporal_1)(rh.superiortemporal_3)              |
| 0.00658 | 5.00E-05 | 0.89892 | 0.96482 | (rh.precuneus_2)(rh.precuneus_3)(rh.superiortemporal_1)(rh.supramarginal_9)              |

|         |          |         |         |                                                                                      |
|---------|----------|---------|---------|--------------------------------------------------------------------------------------|
| 0.00662 | 5.00E-05 | 0.79577 | 0.88945 | (rh.insula_4)(rh.superiortemporal_3)(rh.transversetemporal_1)                        |
| 0.00662 | 5.00E-05 | 0.79577 | 0.88945 | (Right-Pallidum)(rh.parahippocampal_1)(rh.precuneus_3)(rh.superiortemporal_1)        |
| 0.00662 | 5.00E-05 | 0.79577 | 0.88945 | (rh.inferiorparietal_4)(rh.insula_2)(rh.superiortemporal_1)(rh.transversetemporal_1) |
| 0.00662 | 5.00E-05 | 0.79577 | 0.88945 | (rh.fusiform_5)(rh.insula_4)(rh.precuneus_3)(rh.superiortemporal_1)                  |
| 0.00662 | 5.00E-05 | 0.79577 | 0.88945 | (rh.inferiortemporal_2)(rh.precuneus_3)(rh.superiortemporal_1)                       |
| 0.00662 | 5.00E-05 | 0.79577 | 0.88945 | (rh.insula_4)(rh.precuneus_2)(rh.transversetemporal_1)                               |
| 0.00667 | 5.00E-05 | 0.80866 | 0.8995  | (rh.fusiform_5)(rh.inferiorparietal_4)(rh.precuneus_3)(rh.superiortemporal_1)        |
| 0.00673 | 5.00E-05 | 0.78339 | 0.8794  | (Right-Caudate)(rh.insula_4)(rh.precuneus_2)(rh.transversetemporal_1)                |
| 0.00682 | 5.00E-05 | 0.8556  | 0.93467 | (rh.insula_4)(rh.insula_5)(rh.precuneus_3)(rh.superiortemporal_1)                    |
| 0.00684 | 5.00E-05 | 0.71119 | 0.8191  | (rh.fusiform_5)(rh.insula_4)(rh.precuneus_3)(rh.transversetemporal_1)                |
| 0.00685 | 5.00E-05 | 0.8917  | 0.9598  | (rh.inferiorparietal_10)(rh.insula_2)(rh.precuneus_3)(rh.superiortemporal_1)         |
| 0.00685 | 5.00E-05 | 0.8917  | 0.9598  | (rh.precuneus_2)(rh.precuneus_3)(rh.superiortemporal_1)(rh.superiortemporal_3)       |
| 0.00685 | 5.00E-05 | 0.8917  | 0.9598  | (rh.insula_4)(rh.isthmuscingulate_2)(rh.precuneus_2)(rh.precuneus_3)                 |
| 0.00685 | 5.00E-05 | 0.8917  | 0.9598  | (rh.inferiorparietal_10)(rh.precuneus_2)(rh.precuneus_3)(rh.superiortemporal_1)      |
| 0.00685 | 5.00E-05 | 0.8917  | 0.9598  | (rh.insula_2)(rh.insula_4)(rh.precuneus_2)(rh.precuneus_3)                           |
| 0.00685 | 5.00E-05 | 0.8917  | 0.9598  | (Right-Putamen)(rh.insula_4)(rh.precuneus_2)(rh.precuneus_3)                         |
| 0.00685 | 5.00E-05 | 0.8917  | 0.9598  | (Right-Thalamus-Proper)(rh.insula_4)(rh.precuneus_2)(rh.precuneus_3)                 |
| 0.00685 | 5.00E-05 | 0.8917  | 0.9598  | (Right-Pallidum)(rh.precuneus_3)(rh.superiortemporal_1)(rh.superiortemporal_3)       |
| 0.00685 | 5.00E-05 | 0.8917  | 0.9598  | (rh.insula_4)(rh.precuneus_2)(rh.precuneus_3)                                        |
| 0.00699 | 6.00E-05 | 0.76534 | 0.86432 | (rh.inferiorparietal_4)(rh.insula_4)(rh.lateraloccipital_10)(rh.superiortemporal_1)  |
| 0.00699 | 6.00E-05 | 0.76534 | 0.86432 | (rh.insula_4)(rh.lateraloccipital_10)(rh.precuneus_2)(rh.precuneus_3)                |
| 0.00699 | 6.00E-05 | 0.76534 | 0.86432 | (rh.insula_4)(rh.lateraloccipital_10)(rh.precuneus_2)(rh.superiortemporal_1)         |
| 0.00701 | 6.00E-05 | 0.88448 | 0.95477 | (Right-Putamen)(rh.inferiorparietal_4)(rh.insula_4)(rh.precuneus_3)                  |
| 0.00701 | 6.00E-05 | 0.88448 | 0.95477 | (rh.inferiorparietal_4)(rh.insula_2)(rh.insula_4)(rh.precuneus_3)                    |
| 0.00701 | 6.00E-05 | 0.88448 | 0.95477 | (rh.insula_4)(rh.precuneus_2)(rh.precuneus_3)(rh.superiortemporal_3)                 |
| 0.00701 | 6.00E-05 | 0.88448 | 0.95477 | (rh.inferiorparietal_4)(rh.insula_4)(rh.isthmuscingulate_2)(rh.precuneus_3)          |
| 0.00701 | 6.00E-05 | 0.88448 | 0.95477 | (Right-Thalamus-Proper)(rh.inferiorparietal_4)(rh.insula_4)(rh.precuneus_3)          |
| 0.00701 | 6.00E-05 | 0.88448 | 0.95477 | (rh.inferiorparietal_4)(rh.insula_4)(rh.precuneus_3)                                 |
| 0.00702 | 6.00E-05 | 0.72924 | 0.83417 | (rh.insula_4)(rh.precuneus_4)(rh.superiortemporal_1)(rh.transversetemporal_1)        |
| 0.00705 | 6.00E-05 | 0.87004 | 0.94472 | (rh.inferiorparietal_10)(rh.insula_4)(rh.precuneus_2)(rh.precuneus_3)                |
| 0.00707 | 6.00E-05 | 0.87726 | 0.94975 | (rh.inferiorparietal_4)(rh.insula_4)(rh.precuneus_3)(rh.superiortemporal_3)          |
| 0.00708 | 6.00E-05 | 0.74729 | 0.84925 | (rh.insula_4)(rh.middletemporal_4)(rh.superiortemporal_1)(rh.transversetemporal_1)   |
| 0.00711 | 6.00E-05 | 0.94224 | 0.98995 | (rh.insula_2)(rh.superiortemporal_1)                                                 |
| 0.00711 | 6.00E-05 | 0.94224 | 0.98995 | (Right-Thalamus-Proper)(rh.insula_2)(rh.superiortemporal_1)                          |
| 0.00711 | 6.00E-05 | 0.94224 | 0.98995 | (Right-Putamen)(rh.insula_2)(rh.superiortemporal_1)                                  |
| 0.00711 | 6.00E-05 | 0.94224 | 0.98995 | (Right-Putamen)(rh.insula_2)(rh.isthmuscingulate_2)(rh.superiortemporal_1)           |

|         |          |         |         |                                                                                         |
|---------|----------|---------|---------|-----------------------------------------------------------------------------------------|
| 0.00711 | 6.00E-05 | 0.94224 | 0.98995 | (Right-Putamen)(Right-Thalamus-Proper)(rh.insula_2)(rh.superiortemporal_1)              |
| 0.00711 | 6.00E-05 | 0.94224 | 0.98995 | (Right-Thalamus-Proper)(rh.insula_2)(rh.isthmuscingulate_2)(rh.superiortemporal_1)      |
| 0.00711 | 6.00E-05 | 0.94224 | 0.98995 | (rh.insula_2)(rh.isthmuscingulate_2)(rh.superiortemporal_1)                             |
| 0.0072  | 6.00E-05 | 0.92419 | 0.9799  | (Right-Putamen)(rh.inferiorparietal_4)(rh.insula_2)(rh.superiortemporal_1)              |
| 0.0072  | 6.00E-05 | 0.92419 | 0.9799  | (Right-Thalamus-Proper)(rh.inferiorparietal_4)(rh.insula_2)(rh.superiortemporal_1)      |
| 0.0072  | 6.00E-05 | 0.92419 | 0.9799  | (Right-Pallidum)(Right-Thalamus-Proper)(rh.precuneus_2)(rh.superiortemporal_1)          |
| 0.0072  | 6.00E-05 | 0.92419 | 0.9799  | (Right-Pallidum)(rh.precuneus_2)(rh.superiortemporal_1)                                 |
| 0.0072  | 6.00E-05 | 0.92419 | 0.9799  | (Right-Pallidum)(Right-Putamen)(rh.precuneus_2)(rh.superiortemporal_1)                  |
| 0.0072  | 6.00E-05 | 0.92419 | 0.9799  | (Right-Pallidum)(rh.isthmuscingulate_2)(rh.precuneus_2)(rh.superiortemporal_1)          |
| 0.0072  | 6.00E-05 | 0.92419 | 0.9799  | (rh.inferiorparietal_4)(rh.insula_2)(rh.isthmuscingulate_2)(rh.superiortemporal_1)      |
| 0.0072  | 6.00E-05 | 0.92419 | 0.9799  | (rh.inferiorparietal_4)(rh.insula_2)(rh.superiortemporal_1)                             |
| 0.00722 | 7.00E-05 | 0.79061 | 0.88442 | (Right-Pallidum)(rh.insula_4)(rh.precuneus_2)(rh.transversetemporal_1)                  |
| 0.00751 | 7.00E-05 | 0.71841 | 0.82412 | (rh.fusiform_5)(rh.inferiorparietal_4)(rh.insula_4)(rh.transversetemporal_1)            |
| 0.00751 | 7.00E-05 | 0.71841 | 0.82412 | (rh.fusiform_5)(rh.insula_4)(rh.supramarginal_9)(rh.transversetemporal_1)               |
| 0.00756 | 7.00E-05 | 0.77256 | 0.86935 | (Right-Caudate)(rh.insula_4)(rh.precuneus_3)(rh.transversetemporal_1)                   |
| 0.00756 | 7.00E-05 | 0.77256 | 0.86935 | (rh.insula_4)(rh.lateraloccipital_10)(rh.superiortemporal_1)(rh.superiortemporal_3)     |
| 0.00761 | 7.00E-05 | 0.95307 | 0.99497 | (Right-Thalamus-Proper)(rh.superiortemporal_1)                                          |
| 0.00761 | 7.00E-05 | 0.95307 | 0.99497 | (Right-Putamen)(Right-Thalamus-Proper)(rh.superiortemporal_1)                           |
| 0.00761 | 7.00E-05 | 0.95307 | 0.99497 | (Right-Putamen)(rh.superiortemporal_1)                                                  |
| 0.00761 | 7.00E-05 | 0.95307 | 0.99497 | (rh.superiortemporal_1)                                                                 |
| 0.00761 | 7.00E-05 | 0.95307 | 0.99497 | (Right-Putamen)(rh.isthmuscingulate_2)(rh.superiortemporal_1)                           |
| 0.00761 | 7.00E-05 | 0.95307 | 0.99497 | (Right-Putamen)(Right-Thalamus-Proper)(rh.isthmuscingulate_2)(rh.superiortemporal_1)    |
| 0.00761 | 7.00E-05 | 0.95307 | 0.99497 | (Right-Thalamus-Proper)(rh.isthmuscingulate_2)(rh.superiortemporal_1)                   |
| 0.00761 | 7.00E-05 | 0.95307 | 0.99497 | (rh.isthmuscingulate_2)(rh.superiortemporal_1)                                          |
| 0.00774 | 7.00E-05 | 0.79783 | 0.88945 | (rh.insula_2)(rh.insula_4)(rh.superiortemporal_3)(rh.transversetemporal_1)              |
| 0.00774 | 7.00E-05 | 0.79783 | 0.88945 | (Right-Thalamus-Proper)(rh.insula_4)(rh.superiortemporal_3)(rh.transversetemporal_1)    |
| 0.00774 | 7.00E-05 | 0.79783 | 0.88945 | (Right-Pallidum)(rh.inferiorparietal_4)(rh.superiortemporal_1)(rh.transversetemporal_1) |
| 0.00774 | 7.00E-05 | 0.79783 | 0.88945 | (rh.insula_4)(rh.isthmuscingulate_2)(rh.superiortemporal_3)(rh.transversetemporal_1)    |
| 0.00774 | 7.00E-05 | 0.79783 | 0.88945 | (rh.inferiorparietal_4)(rh.precuneus_2)(rh.superiortemporal_1)(rh.transversetemporal_1) |
| 0.00774 | 7.00E-05 | 0.79783 | 0.88945 | (Right-Putamen)(rh.insula_4)(rh.superiortemporal_3)(rh.transversetemporal_1)            |
| 0.00809 | 7.00E-05 | 0.91697 | 0.97487 | (rh.bankssts_2)(rh.isthmuscingulate_2)(rh.precuneus_3)(rh.superiortemporal_1)           |
| 0.00809 | 8.00E-05 | 0.91697 | 0.97487 | (rh.lingual_7)(rh.precuneus_3)(rh.superiortemporal_1)                                   |
| 0.00809 | 8.00E-05 | 0.91697 | 0.97487 | (Right-Thalamus-Proper)(rh.bankssts_2)(rh.precuneus_3)(rh.superiortemporal_1)           |
| 0.00809 | 8.00E-05 | 0.91697 | 0.97487 | (rh.inferiorparietal_4)(rh.precuneus_2)(rh.superiortemporal_1)                          |
| 0.00809 | 8.00E-05 | 0.91697 | 0.97487 | (Right-Putamen)(rh.inferiorparietal_4)(rh.precuneus_2)(rh.superiortemporal_1)           |
| 0.00809 | 8.00E-05 | 0.91697 | 0.97487 | (rh.isthmuscingulate_2)(rh.lingual_7)(rh.precuneus_3)(rh.superiortemporal_1)            |



|         |          |         |         |                                                                                       |
|---------|----------|---------|---------|---------------------------------------------------------------------------------------|
| 0.00809 | 8.00E-05 | 0.91697 | 0.97487 | (Right-Putamen)(rh.lingual_7)(rh.precuneus_3)(rh.superiortemporal_1)                  |
| 0.00809 | 8.00E-05 | 0.91697 | 0.97487 | (rh.bankssts_2)(rh.precuneus_3)(rh.superiortemporal_1)                                |
| 0.00809 | 8.00E-05 | 0.91697 | 0.97487 | (Right-Thalamus-Propri)(rh.lingual_7)(rh.precuneus_3)(rh.superiortemporal_1)          |
| 0.00809 | 8.00E-05 | 0.91697 | 0.97487 | (Right-Pallidum)(rh.inferiorparietal_4)(rh.insula_2)(rh.superiortemporal_1)           |
| 0.00809 | 8.00E-05 | 0.91697 | 0.97487 | (Right-Putamen)(rh.bankssts_2)(rh.precuneus_3)(rh.superiortemporal_1)                 |
| 0.00809 | 8.00E-05 | 0.91697 | 0.97487 | (rh.inferiorparietal_4)(rh.isthmuscingulate_2)(rh.precuneus_2)(rh.superiortemporal_1) |
| 0.00809 | 8.00E-05 | 0.91697 | 0.97487 | (Right-Thalamus-Propri)(rh.inferiorparietal_4)(rh.precuneus_2)(rh.superiortemporal_1) |
| 0.00815 | 8.00E-05 | 0.77978 | 0.87437 | (rh.insula_4)(rh.isthmuscingulate_2)(rh.lateraloccipital_10)(rh.superiortemporal_1)   |
| 0.00815 | 8.00E-05 | 0.77978 | 0.87437 | (Right-Thalamus-Propri)(rh.insula_4)(rh.lateraloccipital_10)(rh.superiortemporal_1)   |
| 0.00815 | 8.00E-05 | 0.77978 | 0.87437 | (rh.insula_4)(rh.lateraloccipital_10)(rh.superiortemporal_1)                          |
| 0.00815 | 8.00E-05 | 0.77978 | 0.87437 | (Right-Pallidum)(rh.insula_4)(rh.precuneus_3)(rh.transversetemporal_1)                |
| 0.00815 | 9.00E-05 | 0.77978 | 0.87437 | (rh.insula_2)(rh.insula_4)(rh.lateraloccipital_10)(rh.superiortemporal_1)             |
| 0.00815 | 9.00E-05 | 0.77978 | 0.87437 | (rh.insula_2)(rh.lateraloccipital_10)(rh.precuneus_3)(rh.superiortemporal_1)          |
| 0.00815 | 9.00E-05 | 0.77978 | 0.87437 | (rh.lateraloccipital_10)(rh.precuneus_2)(rh.precuneus_3)(rh.superiortemporal_1)       |
| 0.00815 | 9.00E-05 | 0.77978 | 0.87437 | (Right-Caudate)(rh.inferiorparietal_4)(rh.insula_4)(rh.transversetemporal_1)          |
| 0.00815 | 9.00E-05 | 0.77978 | 0.87437 | (Right-Putamen)(rh.insula_4)(rh.lateraloccipital_10)(rh.superiortemporal_1)           |
| 0.00823 | 9.00E-05 | 0.76761 | 0.86432 | (rh.inferiorparietal_10)(rh.insula_4)(rh.precuneus_3)(rh.transversetemporal_1)        |
| 0.00823 | 9.00E-05 | 0.72563 | 0.82915 | (rh.fusiform_5)(rh.insula_4)(rh.precuneus_2)(rh.transversetemporal_1)                 |
| 0.00826 | 9.00E-05 | 0.80505 | 0.89447 | (rh.fusiform_5)(rh.insula_4)(rh.precuneus_2)(rh.superiortemporal_1)                   |
| 0.00826 | 9.00E-05 | 0.80505 | 0.89447 | (Right-Pallidum)(rh.precuneus_2)(rh.superiortemporal_1)(rh.transversetemporal_1)      |
| 0.00826 | 9.00E-05 | 0.80505 | 0.89447 | (rh.insula_4)(rh.precuneus_3)(rh.superiortemporal_1)(rh.superiortemporal_6)           |
| 0.00876 | 9.00E-05 | 0.90975 | 0.96985 | (rh.inferiorparietal_4)(rh.insula_2)(rh.precuneus_2)(rh.superiortemporal_1)           |
| 0.00878 | 9.00E-05 | 0.787   | 0.8794  | (Right-Putamen)(rh.inferiorparietal_10)(rh.insula_4)(rh.transversetemporal_1)         |
| 0.00878 | 0.0001   | 0.787   | 0.8794  | (Right-Pallidum)(rh.inferiorparietal_4)(rh.insula_4)(rh.transversetemporal_1)         |
| 0.00878 | 0.0001   | 0.787   | 0.8794  | (rh.inferiorparietal_10)(rh.insula_2)(rh.insula_4)(rh.transversetemporal_1)           |
| 0.00878 | 0.0001   | 0.787   | 0.8794  | (Right-Thalamus-Propri)(rh.inferiorparietal_10)(rh.insula_4)(rh.transversetemporal_1) |
| 0.00878 | 0.0001   | 0.787   | 0.8794  | (rh.inferiorparietal_10)(rh.insula_4)(rh.isthmuscingulate_2)(rh.transversetemporal_1) |
| 0.00878 | 0.0001   | 0.77465 | 0.86935 | (rh.inferiorparietal_10)(rh.inferiorparietal_4)(rh.insula_4)(rh.transversetemporal_1) |
| 0.00878 | 0.0001   | 0.77465 | 0.86935 | (rh.middletemporal_4)(rh.precuneus_3)(rh.precuneus_4)(rh.superiortemporal_1)          |
| 0.00892 | 0.0001   | 0.93502 | 0.98492 | (Right-Pallidum)(Right-Putamen)(rh.insula_2)(rh.superiortemporal_1)                   |
| 0.00892 | 0.0001   | 0.93502 | 0.98492 | (Right-Pallidum)(Right-Thalamus-Propri)(rh.insula_2)(rh.superiortemporal_1)           |
| 0.00892 | 0.0001   | 0.93502 | 0.98492 | (Right-Pallidum)(rh.insula_2)(rh.superiortemporal_1)                                  |
| 0.00892 | 0.0001   | 0.93502 | 0.98492 | (Right-Pallidum)(rh.insula_2)(rh.isthmuscingulate_2)(rh.superiortemporal_1)           |
| 0.009   | 0.00011  | 0.73285 | 0.83417 | (rh.insula_4)(rh.precuneus_4)(rh.supramarginal_9)(rh.transversetemporal_1)            |
| 0.00906 | 0.00011  | 0.76895 | 0.86432 | (rh.insula_4)(rh.insula_5)(rh.superiortemporal_1)(rh.transversetemporal_1)            |
| 0.00906 | 0.00011  | 0.76895 | 0.86432 | (rh.insula_4)(rh.lateraloccipital_10)(rh.precuneus_3)(rh.superiortemporal_3)          |

|         |         |         |         |                                                                                        |
|---------|---------|---------|---------|----------------------------------------------------------------------------------------|
| 0.00923 | 0.00011 | 0.85921 | 0.93467 | (rh.insula_5)(rh.precuneus_2)(rh.precuneus_3)(rh.superiortemporal_1)                   |
| 0.00924 | 0.00011 | 0.90253 | 0.96482 | (rh.inferiorparietal_10)(rh.precuneus_3)(rh.superiortemporal_1)                        |
| 0.00924 | 0.00011 | 0.90253 | 0.96482 | (Right-Thalamus-Proper)(rh.insula_2)(rh.insula_4)(rh.precuneus_3)                      |
| 0.00924 | 0.00011 | 0.90253 | 0.96482 | (Right-Thalamus-Proper)(rh.inferiorparietal_10)(rh.precuneus_3)(rh.superiortemporal_1) |
| 0.00924 | 0.00011 | 0.90253 | 0.96482 | (rh.isthmuscingulate_2)(rh.precuneus_3)(rh.superiortemporal_1)(rh.superiortemporal_3)  |
| 0.00924 | 0.00011 | 0.90253 | 0.96482 | (Right-Thalamus-Proper)(rh.insula_4)(rh.isthmuscingulate_2)(rh.precuneus_3)            |
| 0.00924 | 0.00012 | 0.90253 | 0.96482 | (Right-Putamen)(rh.insula_4)(rh.isthmuscingulate_2)(rh.precuneus_3)                    |
| 0.00924 | 0.00012 | 0.90253 | 0.96482 | (Right-Thalamus-Proper)(rh.precuneus_3)(rh.superiortemporal_1)(rh.superiortemporal_3)  |
| 0.00924 | 0.00012 | 0.90253 | 0.96482 | (Right-Thalamus-Proper)(rh.insula_4)(rh.precuneus_3)                                   |
| 0.00924 | 0.00012 | 0.90253 | 0.96482 | (Right-Pallidum)(rh.insula_4)(rh.lingual_7)(rh.superiortemporal_1)                     |
| 0.00924 | 0.00012 | 0.90253 | 0.96482 | (rh.precuneus_3)(rh.superiortemporal_1)(rh.superiortemporal_3)                         |
| 0.00924 | 0.00012 | 0.90253 | 0.96482 | (rh.insula_4)(rh.precuneus_3)                                                          |
| 0.00924 | 0.00013 | 0.90253 | 0.96482 | (rh.bankssts_2)(rh.insula_4)(rh.lingual_7)(rh.superiortemporal_1)                      |
| 0.00924 | 0.00013 | 0.90253 | 0.96482 | (Right-Putamen)(rh.precuneus_3)(rh.superiortemporal_1)(rh.superiortemporal_3)          |
| 0.00924 | 0.00013 | 0.90253 | 0.96482 | (Right-Putamen)(rh.insula_2)(rh.insula_4)(rh.precuneus_3)                              |
| 0.00924 | 0.00013 | 0.90253 | 0.96482 | (rh.insula_2)(rh.insula_4)(rh.precuneus_3)                                             |
| 0.00924 | 0.00013 | 0.90253 | 0.96482 | (Right-Putamen)(Right-Thalamus-Proper)(rh.insula_4)(rh.precuneus_3)                    |
| 0.00924 | 0.00013 | 0.90253 | 0.96482 | (Right-Putamen)(rh.inferiorparietal_10)(rh.precuneus_3)(rh.superiortemporal_1)         |
| 0.00924 | 0.00014 | 0.90253 | 0.96482 | (rh.insula_4)(rh.isthmuscingulate_2)(rh.precuneus_3)                                   |
| 0.00924 | 0.00014 | 0.90253 | 0.96482 | (Right-Putamen)(rh.insula_4)(rh.precuneus_3)                                           |
| 0.00924 | 0.00014 | 0.90253 | 0.96482 | (rh.insula_2)(rh.insula_4)(rh.isthmuscingulate_2)(rh.precuneus_3)                      |
| 0.00924 | 0.00014 | 0.90253 | 0.96482 | (rh.inferiorparietal_10)(rh.isthmuscingulate_2)(rh.precuneus_3)(rh.superiortemporal_1) |
| 0.00924 | 0.00014 | 0.90253 | 0.96482 | (Right-Pallidum)(rh.bankssts_2)(rh.insula_4)(rh.superiortemporal_1)                    |
| 0.00936 | 0.00014 | 0.78169 | 0.87437 | (rh.insula_4)(rh.lingual_7)(rh.precuneus_3)(rh.transversetemporal_1)                   |
| 0.00936 | 0.00015 | 0.78169 | 0.87437 | (rh.inferiorparietal_10)(rh.insula_4)(rh.precuneus_2)(rh.transversetemporal_1)         |
| 0.00936 | 0.00015 | 0.78169 | 0.87437 | (rh.bankssts_2)(rh.insula_4)(rh.precuneus_3)(rh.transversetemporal_1)                  |
| 0.00936 | 0.00015 | 0.78169 | 0.87437 | (rh.inferiorparietal_10)(rh.insula_4)(rh.superiortemporal_3)(rh.transversetemporal_1)  |
| 0.00944 | 0.00015 | 0.79422 | 0.88442 | (Right-Caudate)(Right-Thalamus-Proper)(rh.insula_4)(rh.transversetemporal_1)           |
| 0.00944 | 0.00016 | 0.79422 | 0.88442 | (Right-Caudate)(Right-Putamen)(rh.insula_4)(rh.transversetemporal_1)                   |
| 0.00944 | 0.00016 | 0.79422 | 0.88442 | (rh.inferiortemporal_2)(rh.insula_4)(rh.precuneus_3)(rh.superiortemporal_1)            |
| 0.00944 | 0.00016 | 0.79422 | 0.88442 | (Right-Caudate)(rh.insula_4)(rh.isthmuscingulate_2)(rh.transversetemporal_1)           |
| 0.00947 | 0.00016 | 0.86643 | 0.9397  | (rh.inferiorparietal_10)(rh.inferiorparietal_4)(rh.insula_4)(rh.precuneus_3)           |
| 0.00947 | 0.00017 | 0.86643 | 0.9397  | (rh.inferiorparietal_4)(rh.insula_4)(rh.precuneus_3)(rh.supramarginal_9)               |
| 0.00954 | 0.00017 | 0.89531 | 0.9598  | (Right-Pallidum)(rh.precuneus_3)(rh.superiortemporal_1)(rh.supramarginal_9)            |
| 0.00954 | 0.00017 | 0.89531 | 0.9598  | (rh.insula_4)(rh.precuneus_3)(rh.superiortemporal_3)                                   |
| 0.00954 | 0.00018 | 0.89531 | 0.9598  | (rh.insula_4)(rh.isthmuscingulate_2)(rh.superiortemporal_1)(rh.supramarginal_9)        |

|         |         |         |         |                                                                                      |
|---------|---------|---------|---------|--------------------------------------------------------------------------------------|
| 0.00954 | 0.00018 | 0.89531 | 0.9598  | (Right-Thalamus-Proper)(rh.insula_4)(rh.precuneus_3)(rh.superiortemporal_3)          |
| 0.00954 | 0.00018 | 0.89531 | 0.9598  | (Right-Putamen)(rh.insula_4)(rh.superiortemporal_1)(rh.supramarginal_9)              |
| 0.00954 | 0.00019 | 0.89531 | 0.9598  | (Right-Caudate)(rh.insula_2)(rh.insula_4)(rh.superiortemporal_1)                     |
| 0.00954 | 0.00019 | 0.89531 | 0.9598  | (Right-Thalamus-Proper)(rh.insula_4)(rh.superiortemporal_1)(rh.supramarginal_9)      |
| 0.00954 | 0.00019 | 0.89531 | 0.9598  | (rh.insula_2)(rh.insula_4)(rh.superiortemporal_1)(rh.supramarginal_9)                |
| 0.00954 | 0.0002  | 0.89531 | 0.9598  | (Right-Caudate)(Right-Putamen)(rh.insula_4)(rh.superiortemporal_1)                   |
| 0.00954 | 0.0002  | 0.89531 | 0.9598  | (rh.insula_4)(rh.isthmuscingulate_2)(rh.precuneus_3)(rh.superiortemporal_3)          |
| 0.00954 | 0.0002  | 0.89531 | 0.9598  | (Right-Caudate)(Right-Pallidum)(rh.precuneus_3)(rh.superiortemporal_1)               |
| 0.00954 | 0.00021 | 0.89531 | 0.9598  | (Right-Putamen)(rh.insula_4)(rh.precuneus_3)(rh.superiortemporal_3)                  |
| 0.00954 | 0.00021 | 0.89531 | 0.9598  | (Right-Caudate)(rh.insula_4)(rh.isthmuscingulate_2)(rh.superiortemporal_1)           |
| 0.00954 | 0.00022 | 0.89531 | 0.9598  | (rh.insula_2)(rh.insula_4)(rh.precuneus_3)(rh.superiortemporal_3)                    |
| 0.00954 | 0.00022 | 0.89531 | 0.9598  | (Right-Caudate)(Right-Thalamus-Proper)(rh.insula_4)(rh.superiortemporal_1)           |
| 0.00954 | 0.00023 | 0.89531 | 0.9598  | (Right-Caudate)(rh.insula_4)(rh.superiortemporal_1)                                  |
| 0.00954 | 0.00023 | 0.89531 | 0.9598  | (rh.insula_4)(rh.superiortemporal_1)(rh.supramarginal_9)                             |
| 0.00959 | 0.00024 | 0.72202 | 0.82412 | (rh.fusiform_5)(rh.inferiortemporal_2)(rh.precuneus_3)(rh.superiortemporal_1)        |
| 0.00963 | 0.00024 | 0.87365 | 0.94472 | (rh.inferiorparietal_10)(rh.insula_4)(rh.precuneus_3)(rh.superiortemporal_3)         |
| 0.00963 | 0.00025 | 0.87365 | 0.94472 | (rh.insula_4)(rh.parahippocampal_2)(rh.precuneus_2)(rh.superiortemporal_1)           |
| 0.00963 | 0.00026 | 0.87365 | 0.94472 | (rh.inferiorparietal_10)(rh.insula_4)(rh.parahippocampal_2)(rh.superiortemporal_1)   |
| 0.00963 | 0.00026 | 0.87365 | 0.94472 | (rh.inferiorparietal_4)(rh.insula_4)(rh.parahippocampal_2)(rh.superiortemporal_1)    |
| 0.00969 | 0.00027 | 0.88809 | 0.95477 | (rh.insula_4)(rh.parahippocampal_2)(rh.superiortemporal_1)                           |
| 0.00969 | 0.00028 | 0.88809 | 0.95477 | (Right-Putamen)(rh.insula_4)(rh.parahippocampal_2)(rh.superiortemporal_1)            |
| 0.00969 | 0.00029 | 0.88809 | 0.95477 | (rh.bankssts_2)(rh.inferiorparietal_10)(rh.insula_4)(rh.superiortemporal_1)          |
| 0.00969 | 0.00029 | 0.88809 | 0.95477 | (rh.inferiorparietal_4)(rh.precuneus_3)(rh.superiortemporal_1)(rh.supramarginal_9)   |
| 0.00969 | 0.0003  | 0.88809 | 0.95477 | (rh.insula_2)(rh.insula_4)(rh.parahippocampal_2)(rh.superiortemporal_1)              |
| 0.00969 | 0.00031 | 0.88809 | 0.95477 | (Right-Pallidum)(rh.parahippocampal_2)(rh.precuneus_3)(rh.superiortemporal_1)        |
| 0.00969 | 0.00032 | 0.88809 | 0.95477 | (Right-Caudate)(rh.inferiorparietal_4)(rh.precuneus_3)(rh.superiortemporal_1)        |
| 0.00969 | 0.00033 | 0.88809 | 0.95477 | (Right-Thalamus-Proper)(rh.insula_4)(rh.parahippocampal_2)(rh.superiortemporal_1)    |
| 0.00969 | 0.00034 | 0.88809 | 0.95477 | (rh.inferiorparietal_10)(rh.insula_4)(rh.lingual_7)(rh.superiortemporal_1)           |
| 0.00969 | 0.00036 | 0.88809 | 0.95477 | (rh.insula_4)(rh.superiortemporal_1)(rh.superiortemporal_3)(rh.supramarginal_9)      |
| 0.00969 | 0.00037 | 0.88809 | 0.95477 | (Right-Caudate)(rh.insula_4)(rh.superiortemporal_1)(rh.superiortemporal_3)           |
| 0.00969 | 0.00038 | 0.88809 | 0.95477 | (rh.insula_4)(rh.isthmuscingulate_2)(rh.parahippocampal_2)(rh.superiortemporal_1)    |
| 0.00969 | 0.0004  | 0.88809 | 0.95477 | (Right-Pallidum)(rh.inferiorparietal_10)(rh.insula_4)(rh.superiortemporal_1)         |
| 0.00971 | 0.00042 | 0.88087 | 0.94975 | (rh.inferiorparietal_4)(rh.parahippocampal_2)(rh.precuneus_3)(rh.superiortemporal_1) |
| 0.00971 | 0.00043 | 0.88087 | 0.94975 | (Right-Putamen)(rh.inferiorparietal_10)(rh.insula_4)(rh.precuneus_3)                 |
| 0.00971 | 0.00045 | 0.88087 | 0.94975 | (Right-Thalamus-Proper)(rh.inferiorparietal_10)(rh.insula_4)(rh.precuneus_3)         |
| 0.00971 | 0.00048 | 0.88087 | 0.94975 | (Right-Caudate)(rh.inferiorparietal_4)(rh.insula_4)(rh.superiortemporal_1)           |

|         |         |         |         |                                                                                                |
|---------|---------|---------|---------|------------------------------------------------------------------------------------------------|
| 0.00971 | 0.0005  | 0.88087 | 0.94975 | (rh.inferiorparietal_4)(rh.insula_4)(rh.superiortemporal_1)(rh.supramarginal_9)                |
| 0.00971 | 0.00053 | 0.88087 | 0.94975 | (rh.inferiorparietal_10)(rh.insula_4)(rh.isthmuscingulate_2)(rh.precuneus_3)                   |
| 0.00971 | 0.00056 | 0.88087 | 0.94975 | (rh.insula_4)(rh.parahippocampal_2)(rh.superiortemporal_1)(rh.superiortemporal_3)              |
| 0.00971 | 0.00059 | 0.88087 | 0.94975 | (rh.inferiorparietal_10)(rh.insula_2)(rh.insula_4)(rh.precuneus_3)                             |
| 0.00971 | 0.00063 | 0.88087 | 0.94975 | (rh.inferiorparietal_10)(rh.insula_4)(rh.precuneus_3)                                          |
| 0.00971 | 0.00067 | 0.88087 | 0.94975 | (Right-Caudate)(rh.insula_4)(rh.precuneus_2)(rh.superiortemporal_1)                            |
| 0.0098  | 0.00071 | 0.77617 | 0.86935 | (rh.insula_2)(rh.insula_4)(rh.lateraloccipital_10)(rh.precuneus_3)                             |
| 0.0098  | 0.00077 | 0.77617 | 0.86935 | (Right-Putamen)(rh.insula_4)(rh.lateraloccipital_10)(rh.precuneus_3)                           |
| 0.0098  | 0.00083 | 0.77617 | 0.86935 | (Right-Thalamus-Proper)(rh.insula_4)(rh.lateraloccipital_10)(rh.precuneus_3)                   |
| 0.0098  | 0.00091 | 0.77617 | 0.86935 | (rh.insula_4)(rh.lateraloccipital_10)(rh.precuneus_3)                                          |
| 0.0098  | 0.001   | 0.77617 | 0.86935 | (rh.insula_4)(rh.isthmuscingulate_2)(rh.lateraloccipital_10)(rh.precuneus_3)                   |
| 0.00992 | 0.00111 | 0.75812 | 0.85427 | (rh.inferiorparietal_10)(rh.insula_4)(rh.lateraloccipital_10)(rh.precuneus_3)                  |
| 0.00996 | 0.00125 | 0.78873 | 0.8794  | (rh.inferiorparietal_4)(rh.precuneus_3)(rh.superiortemporal_1)(rh.transversetemporal_1)        |
| 0.00996 | 0.00143 | 0.78873 | 0.8794  | (rh.bankssts_2)(rh.inferiorparietal_4)(rh.insula_4)(rh.transversetemporal_1)                   |
| 0.00996 | 0.00167 | 0.78873 | 0.8794  | (rh.inferiorparietal_4)(rh.superiortemporal_3)(rh.supramarginal_9)(rh.transversetemporal_1)    |
| 0.00996 | 0.002   | 0.78873 | 0.8794  | (rh.inferiorparietal_4)(rh.superiortemporal_1)(rh.superiortemporal_3)(rh.transversetemporal_1) |
| 0.00996 | 0.0025  | 0.78873 | 0.8794  | (rh.parahippocampal_1)(rh.precuneus_3)(rh.superiortemporal_1)(rh.superiortemporal_3)           |
| 0.00996 | 0.00333 | 0.78873 | 0.8794  | (rh.inferiorparietal_4)(rh.insula_4)(rh.isthmuscingulate_1)(rh.precuneus_3)                    |
| 0.00996 | 0.005   | 0.78873 | 0.8794  | (rh.inferiorparietal_10)(rh.insula_4)(rh.transversetemporal_1)                                 |
| 0.00996 | 0.01    | 0.78873 | 0.8794  | (rh.inferiorparietal_4)(rh.insula_4)(rh.lingual_7)(rh.transversetemporal_1)                    |













l\_1)











\_1)  
ral\_1)
