# Supplementary material for: Good neighbors, bad neighbors: the frequent network neighborhood mapping of the hippocampus enlightens several structural factors of the human intelligence on a 414-subject cohort
Source: PubMed Central journal article supplement (PMC7371878; doi:10.1038/s41598-020-68914-2), 2020-07-20
Supplement: 41598_2020_68914_MOESM12_ESM.pdf [file 41598_2020_68914_MOESM12_ESM.pdf]

| p-value  | Holm-Bonferroni | frequency_upper | frequency_lower | name                                                                                         |
|----------|-----------------|-----------------|-----------------|----------------------------------------------------------------------------------------------|
| 1.00E-05 | 0               | 0.74368         | 0.90452         | (lh.inferiorparietal_4)(lh.inferiorparietal_5)(rh.insula_4)(rh.superiortemporal_1)           |
| 1.00E-05 | 0               | 0.77617         | 0.92462         | (lh.inferiorparietal_4)(lh.inferiorparietal_5)(lh.precuneus_11)(rh.superiortemporal_1)       |
| 1.00E-05 | 0               | 0.75451         | 0.90955         | (lh.inferiorparietal_4)(lh.precuneus_11)(rh.insula_4)(rh.superiortemporal_1)                 |
| 2.00E-05 | 0               | 0.76534         | 0.91457         | (lh.inferiorparietal_4)(lh.inferiorparietal_5)(rh.precuneus_3)(rh.superiortemporal_1)        |
| 3.00E-05 | 0               | 0.77617         | 0.9196          | (lh.inferiorparietal_4)(lh.precuneus_11)(rh.precuneus_3)(rh.superiortemporal_1)              |
| 4.00E-05 | 0               | 0.84838         | 0.96482         | (lh.inferiorparietal_5)(lh.precuneus_11)(rh.insula_4)(rh.superiortemporal_1)                 |
| 4.00E-05 | 0               | 0.75812         | 0.90452         | (lh.inferiorparietal_4)(lh.inferiorparietal_5)(lh.precuneus_11)(rh.insula_4)                 |
| 4.00E-05 | 0               | 0.787           | 0.92462         | (Right-Pallidum)(lh.inferiorparietal_4)(lh.precuneus_11)(rh.superiortemporal_1)              |
| 4.00E-05 | 0               | 0.77256         | 0.91457         | (lh.inferiorparietal_4)(lh.inferiorparietal_5)(rh.inferiorparietal_4)(rh.superiortemporal_1) |
| 4.00E-05 | 0               | 0.77256         | 0.91457         | (lh.inferiorparietal_4)(lh.inferiorparietal_5)(lh.lingual_6)(rh.superiortemporal_1)          |
| 4.00E-05 | 0               | 0.77978         | 0.9196          | (lh.inferiorparietal_4)(lh.lingual_6)(lh.precuneus_11)(rh.superiortemporal_1)                |
| 4.00E-05 | 0               | 0.77978         | 0.9196          | (Right-Pallidum)(lh.inferiorparietal_4)(lh.inferiorparietal_5)(rh.superiortemporal_1)        |
| 6.00E-05 | 0               | 0.79783         | 0.92965         | (Left-Putamen)(lh.inferiorparietal_4)(lh.precuneus_11)(rh.superiortemporal_1)                |
| 6.00E-05 | 0               | 0.79061         | 0.92462         | (lh.inferiorparietal_4)(lh.insula_2)(lh.precuneus_11)(rh.superiortemporal_1)                 |
| 6.00E-05 | 0               | 0.79061         | 0.92462         | (Left-Putamen)(lh.inferiorparietal_4)(lh.inferiorparietal_5)(rh.superiortemporal_1)          |
| 6.00E-05 | 0               | 0.79061         | 0.92462         | (lh.inferiorparietal_4)(lh.precuneus_11)(rh.insula_2)(rh.superiortemporal_1)                 |
| 6.00E-05 | 0               | 0.78339         | 0.9196          | (lh.inferiorparietal_4)(lh.inferiorparietal_5)(lh.insula_2)(rh.superiortemporal_1)           |
| 6.00E-05 | 0               | 0.78339         | 0.9196          | (lh.inferiorparietal_4)(lh.precuneus_11)(rh.inferiorparietal_4)(rh.superiortemporal_1)       |
| 6.00E-05 | 0               | 0.78339         | 0.9196          | (lh.inferiorparietal_4)(lh.inferiorparietal_5)(rh.insula_2)(rh.superiortemporal_1)           |
| 6.00E-05 | 0               | 0.78339         | 0.9196          | (lh.inferiorparietal_4)(lh.inferiorparietal_5)(rh.precuneus_2)(rh.superiortemporal_1)        |
| 7.00E-05 | 0               | 0.88087         | 0.9799          | (Right-Pallidum)(lh.inferiorparietal_5)(lh.precuneus_11)(rh.superiortemporal_1)              |
| 7.00E-05 | 0               | 0.83755         | 0.95477         | (lh.inferiorparietal_5)(rh.insula_4)(rh.precuneus_3)(rh.superiortemporal_1)                  |
| 8.00E-05 | 0               | 0.8917          | 0.98492         | (Left-Putamen)(lh.inferiorparietal_5)(lh.precuneus_11)(rh.superiortemporal_1)                |
| 9.00E-05 | 0               | 0.76534         | 0.90452         | (Right-Amygdala)(lh.inferiorparietal_4)(lh.precuneus_11)(rh.superiortemporal_1)              |
| 9.00E-05 | 0               | 0.77256         | 0.90955         | (lh.inferiorparietal_4)(rh.inferiorparietal_4)(rh.precuneus_3)(rh.superiortemporal_1)        |
| 9.00E-05 | 0               | 0.77256         | 0.90955         | (Left-Thalamus-Proper)(lh.inferiorparietal_4)(rh.insula_4)(rh.superiortemporal_1)            |
| 9.00E-05 | 0               | 0.77256         | 0.90955         | (Right-Putamen)(lh.inferiorparietal_4)(rh.insula_4)(rh.superiortemporal_1)                   |
| 9.00E-05 | 0               | 0.77256         | 0.90955         | (Left-Putamen)(lh.inferiorparietal_4)(rh.insula_4)(rh.superiortemporal_1)                    |
| 9.00E-05 | 0               | 0.77256         | 0.90955         | (lh.inferiorparietal_4)(rh.insula_2)(rh.insula_4)(rh.superiortemporal_1)                     |
| 9.00E-05 | 0               | 0.77256         | 0.90955         | (lh.inferiorparietal_4)(rh.insula_4)(rh.superiortemporal_1)                                  |
| 9.00E-05 | 0               | 0.77256         | 0.90955         | (lh.inferiorparietal_4)(rh.insula_4)(rh.isthmuscingulate_2)(rh.superiortemporal_1)           |
| 9.00E-05 | 0               | 0.77256         | 0.90955         | (Right-Thalamus-Proper)(lh.inferiorparietal_4)(rh.insula_4)(rh.superiortemporal_1)           |
| 9.00E-05 | 0               | 0.77256         | 0.90955         | (lh.inferiorparietal_4)(lh.isthmuscingulate_3)(rh.insula_4)(rh.superiortemporal_1)           |
